# Supplementary material for: Transcriptomic analyses reveal the potential regulators of the storage root skin color in sweet potato
Source: PeerJ. 2025 Dec 1;13:e20231. doi: 10.7717/peerj.20231 (PMC12677044; doi:10.7717/peerj.20231)
Supplement: Supplemental Information 1 [file peerj-13-20231-s001.xlsx]

## Sheet: Sheet1
Sample	RawDatas	CleanData(%)	Adapter(%)	LowQuality(%)	GC content (%)
M1-125-F1	50730516	50477684 (99.50%)	14428 (0.03%)	230936 (0.46%)	0.453
M1-125-F2	56766264	56437956 (99.42%)	32132 (0.06%)	288040 (0.51%)	0.454
M1-125-F3	52399712	52100626 (99.43%)	26836 (0.05%)	264796 (0.51%)	0.4531
M1-125T-F1	50816670	50522432 (99.42%)	26464 (0.05%)	258224 (0.51%)	0.4562
M1-125T-F2	51848504	51576026 (99.47%)	14248 (0.03%)	250814 (0.48%)	0.4541
M1-125T-F3	44566608	44354672 (99.52%)	23274 (0.05%)	188634 (0.42%)	0.4561
M1-125-S1	43541722	43109946 (99.01%)	217062 (0.50%)	211268 (0.49%)	0.4438
M1-125-S2	60734208	60345046 (99.36%)	141272 (0.23%)	244370 (0.40%)	0.4453
M1-125-S3	39480568	39243066 (99.40%)	11498 (0.03%)	225802 (0.57%)	0.4476
M1-125T-S1	60049504	59724658 (99.46%)	26600 (0.04%)	297710 (0.50%)	0.4394
M1-125T-S2	55736454	55476220 (99.53%)	14218 (0.03%)	246012 (0.44%)	0.4412
M1-125T-S3	48948978	48717136 (99.53%)	11672 (0.02%)	220166 (0.45%)	0.4419
