# Supplementary material for: Transcriptomic analyses reveal the potential regulators of the storage root skin color in sweet potato
Source: PeerJ. 2025 Dec 1;13:e20231. doi: 10.7717/peerj.20231 (PMC12677044; doi:10.7717/peerj.20231)
Supplement: Supplemental Information 2 [file peerj-13-20231-s002.xlsx]

## Sheet: M1-125T-F_vs_M1-125-F
gene	baseMean	log2FoldChange	lfcSE	stat	pvalue	padj	M1-125-F-1counts	M1-125-F-2counts	M1-125-F-3counts	M1-125T-F-1 counts	M1-125T-F-2 counts	M1-125T-F-3 counts	significant
Ibat.Brg_v3.01AG003300	45.1644	2.41007	0.610464	3.94794	7.88267e-05	0.00190553	18	14	14	151	43	25	up
Ibat.Brg_v3.01AG003560	20.3009	2.82882	0.686363	4.12147	3.76463e-05	0.000990496	9	5	2	32	37	31	up
Ibat.Brg_v3.01AG003740	15.2945	3.34239	0.80856	4.13375	3.56888e-05	0.000943179	2	5	2	21	37	21	up
Ibat.Brg_v3.01AG003980	21.7032	2.79686	0.719451	3.88749	0.000101288	0.00236083	5	12	1	28	46	33	up
Ibat.Brg_v3.01AG004290	88.4724	1.75235	0.331468	5.28663	1.24594e-07	5.37188e-06	28	62	43	131	163	94	up
Ibat.Brg_v3.01AG004490	37.6633	1.86231	0.542568	3.43239	0.000598281	0.0107085	25	18	9	77	32	56	up
Ibat.Brg_v3.01AG004980	10.1225	6.89037	1.45949	4.72108	2.346e-06	8.08102e-05	0	0	0	12	27	18	up
Ibat.Brg_v3.01AG005090	838.376	1.01885	0.185239	5.50022	3.79326e-08	1.76797e-06	376	798	646	1283	1127	777	up
Ibat.Brg_v3.01AG005160	1515.67	1.20304	0.345345	3.48359	0.000494743	0.00913089	751	885	1338	2629	1490	1819	up
Ibat.Brg_v3.01AG005310	73.6455	2.74947	0.366463	7.50273	6.25014e-14	5.57666e-12	14	23	25	103	116	138	up
Ibat.Brg_v3.01AG006060	37.9978	-1.26183	0.435979	-2.89424	0.00380077	0.0472431	56	54	63	17	27	19	down
Ibat.Brg_v3.01AG006580	49.9855	-1.39471	0.456412	-3.05581	0.00224451	0.0314828	38	92	108	23	34	21	down
Ibat.Brg_v3.01AG007950	26.8214	-2.9686	0.835719	-3.55215	0.000382091	0.00734528	70	79	5	7	4	6	down
Ibat.Brg_v3.01AG008590	40.8944	7.03397	1.09462	6.42597	1.3103e-10	8.3411e-09	1	0	1	79	77	72	up
Ibat.Brg_v3.01AG008600	85.256	9.96315	1.22249	8.14989	3.64257e-16	3.91094e-14	0	0	0	170	121	183	up
Ibat.Brg_v3.01AG008720	59.787	1.30953	0.360386	3.63369	0.000279392	0.00565608	35	37	39	65	79	93	up
Ibat.Brg_v3.01AG008900	7.94701	6.54216	1.5047	4.34782	1.37497e-05	0.000402263	0	0	0	15	18	12	up
Ibat.Brg_v3.01AG008920	221.579	11.3429	1.30229	8.70995	3.04002e-18	3.64471e-16	0	0	0	572	497	204	up
Ibat.Brg_v3.01AG015810	24.1586	-1.81361	0.59528	-3.04665	0.00231407	0.0322652	30	52	41	15	5	10	down
Ibat.Brg_v3.01AG019780	14.2938	4.11807	0.922795	4.46261	8.09669e-06	0.00024937	2	1	2	23	22	30	up
Ibat.Brg_v3.01AG021150	13.1766	-2.99211	0.929298	-3.21975	0.00128301	0.0200867	21	30	25	0	2	6	down
Ibat.Brg_v3.01AG023050	55.2707	3.49659	0.470394	7.43333	1.05897e-13	9.23488e-12	13	10	6	113	119	58	up
Ibat.Brg_v3.01AG023740	23.7088	-4.69707	1.02427	-4.58576	4.5234e-06	0.000146887	24	16	107	0	4	1	down
Ibat.Brg_v3.01AG024400	71.6328	-1.96434	0.357471	-5.4951	3.90486e-08	1.81559e-06	127	114	126	18	36	28	down
Ibat.Brg_v3.01AG024750	35.8367	3.25285	0.84361	3.85587	0.000115319	0.00263781	7	8	7	4	47	122	up
Ibat.Brg_v3.01AG025860	75.831	1.27535	0.306838	4.15643	3.23256e-05	0.000863434	40	54	50	112	90	99	up
Ibat.Brg_v3.01AG027050	44.1192	4.21629	0.650794	6.47869	9.252e-11	6.04951e-09	2	13	0	90	75	71	up
Ibat.Brg_v3.01AG027280	34.0119	-3.18061	0.531772	-5.98115	2.21571e-09	1.23061e-07	57	74	68	8	5	6	down
Ibat.Brg_v3.01AG027670	121.223	-1.64435	0.28481	-5.77352	7.76333e-09	4.00854e-07	173	263	164	67	63	37	down
Ibat.Brg_v3.01AG027710	39.6432	-2.24335	0.647466	-3.46481	0.000530603	0.00968146	16	144	61	11	16	12	down
Ibat.Brg_v3.01AG029190	147.647	1.00239	0.261298	3.8362	0.000124951	0.0028256	64	131	127	186	193	175	up
Ibat.Brg_v3.01AG029280	958.768	2.05246	0.113286	18.1176	2.31591e-73	1.33234e-70	397	376	429	1641	1488	1231	up
Ibat.Brg_v3.01AG029380	65.3489	1.53564	0.32703	4.6957	2.65689e-06	9.05481e-05	30	42	37	103	91	80	up
Ibat.Brg_v3.01AG029810	29.9392	2.54041	0.620589	4.09354	4.24836e-05	0.00110309	7	19	3	46	39	57	up
Ibat.Brg_v3.01AG030410	1458.63	1.13494	0.0761291	14.9081	2.91745e-50	1.04608e-47	883	1050	1026	1981	2029	1643	up
Ibat.Brg_v3.01AG030640	95.6518	3.1188	0.395535	7.885	3.14527e-15	3.13267e-13	6	28	31	189	162	134	up
Ibat.Brg_v3.01AG030970	724.074	1.33065	0.115944	11.4766	1.72897e-30	3.70241e-28	370	487	481	1084	945	887	up
Ibat.Brg_v3.01BG001060	13.2609	3.75889	1.08593	3.46146	0.000537261	0.00979136	0	2	4	42	26	4	up
Ibat.Brg_v3.01BG002500	14.2136	7.38188	1.37566	5.36608	8.04666e-08	3.57944e-06	0	0	0	29	34	18	up
Ibat.Brg_v3.01BG002590	17.3764	7.67157	1.35237	5.67267	1.40588e-08	6.97872e-07	0	0	0	27	49	23	up
Ibat.Brg_v3.01BG002600	752.962	8.55033	0.418861	20.4133	1.27395e-92	8.3939e-90	2	9	2	1552	1283	1377	up
Ibat.Brg_v3.01BG002610	16.4087	4.65962	0.971031	4.79863	1.59752e-06	5.6674e-05	2	0	2	32	39	19	up
Ibat.Brg_v3.01BG003190	57.7429	-1.96845	0.483213	-4.07367	4.62778e-05	0.00119276	75	154	74	12	40	15	down
Ibat.Brg_v3.01BG004580	44.4908	1.76023	0.409216	4.30146	1.69678e-05	0.000485902	17	25	24	80	60	54	up
Ibat.Brg_v3.01BG005530	25.8682	3.04426	0.602066	5.05636	4.27343e-07	1.68943e-05	8	6	4	36	55	39	up
Ibat.Brg_v3.01BG006680	30.5781	1.52804	0.492351	3.10356	0.00191205	0.0276652	13	15	23	51	40	37	up
Ibat.Brg_v3.01BG006700	65.5616	1.27178	0.322911	3.93849	8.19947e-05	0.00197099	33	49	43	93	88	80	up
Ibat.Brg_v3.01BG006800	43.6499	8.99832	1.24281	7.24033	4.47599e-13	3.6747e-11	0	0	0	88	78	79	up
Ibat.Brg_v3.01BG006810	228.949	10.4268	1.1907	8.75689	2.00706e-18	2.44045e-16	0	1	0	432	448	406	up
Ibat.Brg_v3.01BG006910	725.945	1.13193	0.101134	11.1923	4.44604e-29	8.9724e-27	460	504	508	945	1006	855	up
Ibat.Brg_v3.01BG007260	1880.87	6.97721	0.164818	42.3328	0	0	23	32	41	3731	3478	3281	up
Ibat.Brg_v3.01BG007280	6295.27	10.1058	0.243075	41.5748	0	0	6	14	17	12859	11846	10703	up
Ibat.Brg_v3.01BG007290	2209.14	7.68913	0.185551	41.4395	0	0	20	19	30	4282	4213	3865	up
Ibat.Brg_v3.01BG007310	2149.17	11.7651	0.724804	16.2321	2.98823e-59	1.30148e-56	0	0	4	4405	4025	3664	up
Ibat.Brg_v3.01BG007320	4087.52	7.93309	0.15216	52.1365	0	0	24	40	44	8108	7504	7257	up
Ibat.Brg_v3.01BG007340	6647.59	9.69177	0.585955	16.5401	1.88661e-61	8.5052e-59	14	33	6	13783	11492	11990	up
Ibat.Brg_v3.01BG007350	7663.99	7.91618	0.11464	69.0523	0	0	47	83	75	15406	14134	13371	up
Ibat.Brg_v3.01BG007360	28.9657	8.40465	1.29077	6.51136	7.44743e-11	4.91543e-09	0	0	0	45	45	70	up
Ibat.Brg_v3.01BG007370	70.5296	7.82897	1.06661	7.34008	2.13474e-13	1.81441e-11	0	0	2	131	134	129	up
Ibat.Brg_v3.01BG007380	4101.64	11.3752	0.459809	24.7389	4.07706e-135	4.08182e-132	4	2	4	8171	7667	7210	up
Ibat.Brg_v3.01BG008420	50.7619	4.58616	0.56105	8.17425	2.97716e-16	3.20992e-14	7	2	4	121	79	75	up
Ibat.Brg_v3.01BG008660	17.59	4.78	1.33019	3.59347	0.000326304	0.00644829	2	2	0	2	94	4	up
Ibat.Brg_v3.01BG012460	9.52228	3.49916	1.17464	2.97893	0.00289252	0.0382412	2	2	1	2	29	18	up
Ibat.Brg_v3.01BG013780	18.347	-2.05048	0.643473	-3.18659	0.00143961	0.0220485	31	40	25	7	6	7	down
Ibat.Brg_v3.01BG018000	32.4418	1.70781	0.502148	3.401	0.000671388	0.0117657	12	27	11	45	52	43	up
Ibat.Brg_v3.01BG024590	14.4231	2.85645	0.890598	3.20734	0.00133969	0.0207842	8	2	1	13	34	24	up
Ibat.Brg_v3.01BG025640	173.428	-1.06956	0.206231	-5.18622	2.14603e-07	8.90357e-06	256	256	246	112	99	103	down
Ibat.Brg_v3.01BG026160	7159.38	3.87692	0.0687417	56.3983	0	0	793	1104	1069	13634	12708	11399	up
Ibat.Brg_v3.01BG028950	18.9698	-5.14064	1.38084	-3.72283	0.000197	0.00419755	7	2	110	2	1	0	down
Ibat.Brg_v3.01BG030400	54.3428	1.3108	0.381707	3.43405	0.000594643	0.0106632	35	36	30	65	101	54	up
Ibat.Brg_v3.01BG032050	97.9794	1.07278	0.27508	3.89987	9.62446e-05	0.0022648	56	87	63	139	137	100	up
Ibat.Brg_v3.01BG033220	167.536	2.90174	0.257693	11.2605	2.05658e-29	4.20536e-27	27	52	50	309	248	272	up
Ibat.Brg_v3.01BG033330	47.8203	-1.21941	0.406271	-3.00147	0.00268683	0.0361772	53	94	72	21	35	25	down
Ibat.Brg_v3.01BG033780	12.1021	-4.99428	1.41957	-3.51818	0.000434525	0.00817811	54	8	10	0	0	2	down
Ibat.Brg_v3.01BG034040	89.8293	-1.62555	0.298623	-5.4435	5.22431e-08	2.393e-06	153	167	119	48	41	35	down
Ibat.Brg_v3.01BG034480	127.066	1.22226	0.268975	4.54414	5.51608e-06	0.000176008	69	92	87	201	197	109	up
Ibat.Brg_v3.01BG034710	82.1916	-1.73268	0.446766	-3.87827	0.000105202	0.00243617	61	128	224	42	24	40	down
Ibat.Brg_v3.01BG035500	172.51	1.9059	0.231548	8.23113	1.85457e-16	2.01082e-14	79	100	57	272	272	224	up
Ibat.Brg_v3.01BG035590	15.4978	2.10467	0.730449	2.88134	0.00395994	0.0488044	5	8	6	18	17	34	up
Ibat.Brg_v3.01BG035610	170.226	1.97937	0.293692	6.73959	1.58831e-11	1.11009e-09	53	124	50	292	265	211	up
Ibat.Brg_v3.01BG035930	35.3209	2.7806	0.484192	5.74276	9.31459e-09	4.74909e-07	10	10	9	62	55	56	up
Ibat.Brg_v3.01BG035980	20.1615	2.36941	0.644607	3.67574	0.000237158	0.00493323	8	6	7	38	21	35	up
Ibat.Brg_v3.01BG036730	444.432	1.14826	0.13596	8.44556	3.02597e-17	3.4406e-15	259	313	324	647	564	514	up
Ibat.Brg_v3.01BG036940	8.9877	6.72239	1.52006	4.42244	9.75924e-06	0.000295881	0	0	0	23	23	6	up
Ibat.Brg_v3.01BG036950	44.4284	3.64426	0.520384	7.00302	2.505e-12	1.87123e-10	10	3	8	87	65	78	up
Ibat.Brg_v3.01BG037100	58.7048	1.67018	0.462157	3.61388	0.000301651	0.00604792	16	39	37	61	62	122	up
Ibat.Brg_v3.01BG038350	33.9186	1.44912	0.468044	3.09612	0.00196074	0.0282213	15	19	25	59	41	40	up
Ibat.Brg_v3.01BG038570	23.9439	3.13591	0.876558	3.57752	0.000346863	0.00678673	5	8	3	17	101	8	up
Ibat.Brg_v3.01BG039670	24.7058	1.58491	0.542061	2.92386	0.00345722	0.0439073	12	13	15	47	32	26	up
Ibat.Brg_v3.01BG039990	27.5414	-2.09443	0.572322	-3.65954	0.000252673	0.00520816	36	65	45	11	5	13	down
Ibat.Brg_v3.01CG000190	38.318	-2.98255	0.641739	-4.6476	3.35821e-06	0.000111829	116	73	27	11	4	9	down
Ibat.Brg_v3.01CG000680	191.795	1.0803	0.224449	4.81312	1.4859e-06	5.32191e-05	114	153	133	271	194	262	up
Ibat.Brg_v3.01CG000760	66.6908	-2.1394	0.619819	-3.45166	0.000557148	0.010106	237	58	42	39	16	15	down
Ibat.Brg_v3.01CG001730	18.5405	4.01539	0.825995	4.86127	1.16633e-06	4.27542e-05	2	3	2	30	21	45	up
Ibat.Brg_v3.01CG001850	26.7206	-5.23634	1.73704	-3.01453	0.00257379	0.0349689	5	162	13	3	1	0	down
Ibat.Brg_v3.01CG001960	20.9161	6.04186	1.17836	5.12736	2.93829e-07	1.19217e-05	2	0	0	47	28	40	up
Ibat.Brg_v3.01CG002010	17.4728	7.67735	1.335	5.75083	8.88064e-09	4.54588e-07	0	0	0	36	30	32	up
Ibat.Brg_v3.01CG002030	302.784	2.95322	0.177726	16.6167	5.27203e-62	2.43366e-59	62	89	74	532	490	484	up
Ibat.Brg_v3.01CG002050	43.032	8.97664	1.26411	7.10115	1.23724e-12	9.69294e-11	0	0	0	95	51	93	up
Ibat.Brg_v3.01CG002060	1439.21	9.37792	0.394179	23.791	4.13618e-125	3.93652e-122	4	7	3	2944	2671	2471	up
Ibat.Brg_v3.01CG002090	336.802	1.00014	0.218551	4.57623	4.73419e-06	0.000153409	140	325	273	449	426	389	up
Ibat.Brg_v3.01CG002130	433.655	7.37721	1.07482	6.86366	6.71185e-12	4.85381e-10	12	0	4	985	751	695	up
Ibat.Brg_v3.01CG002150	9436.21	1.36508	0.147875	9.2313	2.6737e-20	3.6288e-18	4551	6498	6134	14474	11392	12279	up
Ibat.Brg_v3.01CG002230	1641.44	1.45462	0.223467	6.50931	7.54969e-11	4.97016e-09	921	1042	878	1783	2278	2628	up
Ibat.Brg_v3.01CG003160	38.573	-2.97102	0.848637	-3.50094	0.000463622	0.00865601	8	30	185	9	12	4	down
Ibat.Brg_v3.01CG003880	76.4571	-1.07818	0.329436	-3.27279	0.0010649	0.0173302	114	109	112	55	57	28	down
Ibat.Brg_v3.01CG004100	79.4915	1.11507	0.295843	3.76912	0.000163825	0.00357263	52	49	61	108	105	93	up
Ibat.Brg_v3.01CG004110	15.1667	-3.09306	0.923003	-3.35108	0.000804975	0.0137687	18	49	23	7	0	2	down
Ibat.Brg_v3.01CG004200	265.022	1.11147	0.168161	6.60958	3.85408e-11	2.61772e-09	162	201	181	384	321	314	up
Ibat.Brg_v3.01CG004930	31.5887	4.25087	0.72304	5.87916	4.12343e-09	2.20135e-07	6	0	4	74	69	29	up
Ibat.Brg_v3.01CG004950	48.8944	2.75389	0.514884	5.34855	8.86603e-08	3.91008e-06	6	9	26	79	104	59	up
Ibat.Brg_v3.01CG004990	8.13066	4.65839	1.46	3.19067	0.00141942	0.021793	0	0	2	4	18	21	up
Ibat.Brg_v3.01CG005190	748.68	1.18601	0.105694	11.2212	3.20784e-29	6.49061e-27	477	516	486	947	1103	880	up
Ibat.Brg_v3.01CG005240	248.571	1.32963	0.183461	7.24752	4.24476e-13	3.49603e-11	138	189	133	352	320	326	up
Ibat.Brg_v3.01CG005870	503.518	1.42836	0.124109	11.5089	1.18949e-30	2.56139e-28	257	336	293	755	694	619	up
Ibat.Brg_v3.01CG006000	177.077	1.02066	0.261359	3.90521	9.41452e-05	0.00222287	134	154	91	197	304	172	up
Ibat.Brg_v3.01CG006220	6424.62	7.38627	0.261243	28.2736	7.30083e-176	1.06193e-172	51	90	108	12516	12002	11365	up
Ibat.Brg_v3.01CG006240	1756.5	14.3291	1.18019	12.1414	6.37024e-34	1.52985e-31	0	0	0	3416	3332	3122	up
Ibat.Brg_v3.01CG006250	3696.29	12.5478	0.72324	17.3494	1.99418e-67	1.02488e-64	0	2	2	7262	7209	6332	up
Ibat.Brg_v3.01CG006980	24.0145	1.9491	0.581171	3.35375	0.000797245	0.0136607	9	10	13	53	28	27	up
Ibat.Brg_v3.01CG008400	75.1428	1.18611	0.316794	3.74411	0.000181034	0.00389795	54	52	42	114	86	93	up
Ibat.Brg_v3.01CG012690	73.6863	-5.86874	1.41156	-4.15764	3.21552e-05	0.000859218	4	239	243	2	3	2	down
Ibat.Brg_v3.01CG016180	14.3494	2.62427	0.805511	3.25789	0.00112243	0.0180492	5	6	2	14	37	19	up
Ibat.Brg_v3.01CG017470	84.337	-1.66622	0.321005	-5.19065	2.09561e-07	8.71362e-06	140	111	161	37	45	32	down
Ibat.Brg_v3.01CG021690	2683.78	3.96059	0.0789684	50.1541	0	0	288	401	363	4997	4758	4425	up
Ibat.Brg_v3.01CG021970	50.2432	1.25978	0.381427	3.30282	0.000957173	0.0159074	31	39	26	59	67	72	up
Ibat.Brg_v3.01CG023250	16.3143	3.78635	1.22613	3.08805	0.00201473	0.0288536	2	0	5	6	3	70	up
Ibat.Brg_v3.01CG024320	19.2368	3.0993	0.921952	3.36167	0.000774716	0.0133221	3	4	6	8	13	70	up
Ibat.Brg_v3.01CG024510	11.2299	2.82745	0.86274	3.27729	0.00104808	0.0171324	3	4	2	15	20	20	up
Ibat.Brg_v3.01CG024700	6.61703	6.27988	1.59331	3.94139	8.10094e-05	0.00194852	0	0	0	19	13	6	up
Ibat.Brg_v3.01CG026640	84.7006	1.31256	0.320604	4.09403	4.23938e-05	0.00110113	34	64	61	141	104	96	up
Ibat.Brg_v3.01CG026800	1483.52	-1.18569	0.0836051	-14.182	1.18399e-45	3.66561e-43	1972	2514	2206	934	823	791	down
Ibat.Brg_v3.01CG027000	103.074	3.70826	0.345191	10.7426	6.4187e-27	1.18661e-24	9	25	14	187	207	148	up
Ibat.Brg_v3.01CG027830	13.2567	4.41716	1.40961	3.13359	0.0017268	0.0255411	0	4	0	2	6	58	up
Ibat.Brg_v3.01CG028380	299.63	2.04097	0.199457	10.2327	1.41589e-24	2.33228e-22	88	145	149	547	431	383	up
Ibat.Brg_v3.01CG028460	243.95	2.1219	0.216676	9.79293	1.20749e-22	1.811e-20	89	134	74	410	339	364	up
Ibat.Brg_v3.01CG028480	59.1292	2.05871	0.407118	5.05678	4.26385e-07	1.68651e-05	34	17	22	85	115	70	up
Ibat.Brg_v3.01CG028810	7.00273	3.83076	1.28242	2.98712	0.00281616	0.0375147	0	1	2	10	9	17	up
Ibat.Brg_v3.01CG029650	396.95	1.07119	0.14078	7.60896	2.76309e-14	2.54793e-12	241	322	269	488	574	454	up
Ibat.Brg_v3.01CG029830	28.9019	3.99465	0.634945	6.29134	3.14745e-10	1.92569e-08	4	3	4	54	45	53	up
Ibat.Brg_v3.01CG029990	383.14	1.40318	0.155282	9.03634	1.6201e-19	2.10258e-17	175	285	226	538	559	470	up
Ibat.Brg_v3.01DG000960	319.162	2.97782	0.176163	16.9038	4.22139e-64	2.03392e-61	65	100	69	559	552	484	up
Ibat.Brg_v3.01DG002720	36.9694	-2.5346	0.840683	-3.01493	0.00257042	0.0349344	163	14	15	12	13	6	down
Ibat.Brg_v3.01DG004490	216.583	1.01956	0.198771	5.12934	2.90762e-07	1.18097e-05	118	196	153	278	267	269	up
Ibat.Brg_v3.01DG005500	73.4529	1.4737	0.331324	4.4479	8.67133e-06	0.000265689	34	57	36	87	121	96	up
Ibat.Brg_v3.01DG006020	292.456	10.7796	1.19014	9.05745	1.33541e-19	1.7419e-17	1	0	0	567	509	560	up
Ibat.Brg_v3.01DG006040	10.8957	6.99806	1.43965	4.86095	1.16822e-06	4.27828e-05	0	0	0	16	31	15	up
Ibat.Brg_v3.01DG006120	454.861	1.10411	0.126012	8.76198	1.91853e-18	2.34018e-16	285	320	330	584	626	537	up
Ibat.Brg_v3.01DG006400	326.832	6.95483	0.393873	17.6576	8.90189e-70	4.70032e-67	1	10	6	600	553	657	up
Ibat.Brg_v3.01DG006420	2708.6	11.2912	0.548699	20.5782	4.30616e-94	2.91195e-91	2	0	5	5478	5209	4563	up
Ibat.Brg_v3.01DG006430	3146.26	11.7298	0.591428	19.833	1.54524e-87	9.92685e-85	4	1	1	6130	6197	5380	up
Ibat.Brg_v3.01DG007250	64.7648	-1.59682	0.392066	-4.07283	4.64454e-05	0.00119628	82	141	96	29	46	17	down
Ibat.Brg_v3.01DG010960	127.308	1.28693	0.256686	5.01363	5.34131e-07	2.07228e-05	64	111	67	176	180	153	up
Ibat.Brg_v3.01DG013520	95.9849	-1.19882	0.275023	-4.35897	1.30678e-05	0.000384063	120	166	149	49	64	51	down
Ibat.Brg_v3.01DG013530	122.043	-1.51051	0.256435	-5.89043	3.85197e-09	2.06214e-07	205	215	164	68	62	49	down
Ibat.Brg_v3.01DG017050	74.3228	-1.28296	0.315856	-4.06185	4.86859e-05	0.00124815	88	127	128	47	39	36	down
Ibat.Brg_v3.01DG019400	247.524	1.72512	0.178283	9.67629	3.80263e-22	5.54148e-20	127	123	121	368	350	348	up
Ibat.Brg_v3.01DG020910	85.871	3.95132	0.46389	8.5178	1.6261e-17	1.88506e-15	7	14	13	208	75	166	up
Ibat.Brg_v3.01DG025500	135.305	1.63838	0.267631	6.1218	9.2525e-10	5.34289e-08	52	89	74	215	234	134	up
Ibat.Brg_v3.01DG025610	98.7406	-1.14081	0.310554	-3.67345	0.000239294	0.00496982	147	144	147	72	38	62	down
Ibat.Brg_v3.01DG025980	109.342	2.32847	0.292136	7.97051	1.58017e-15	1.61131e-13	45	38	34	159	218	139	up
Ibat.Brg_v3.01DG026360	103.107	-1.03675	0.290001	-3.57499	0.000350239	0.00684235	126	196	131	77	71	44	down
Ibat.Brg_v3.01DG026570	18.3125	2.49327	0.724967	3.43915	0.000583538	0.0105228	2	5	11	35	22	30	up
Ibat.Brg_v3.01DG027190	194.157	1.14685	0.201712	5.68557	1.30377e-08	6.50536e-07	143	126	120	244	274	234	up
Ibat.Brg_v3.01DG027520	71.631	-1.52282	0.316818	-4.80663	1.53498e-06	5.47577e-05	96	137	113	37	34	33	down
Ibat.Brg_v3.01DG028210	20.3322	2.48579	0.633851	3.92172	8.79197e-05	0.00209055	7	9	4	28	38	31	up
Ibat.Brg_v3.01DG028590	72.4002	1.97857	0.344883	5.73693	9.6407e-09	4.8927e-07	34	23	37	108	104	111	up
Ibat.Brg_v3.01DG028980	40.5543	-2.19757	0.510703	-4.30304	1.68474e-05	0.000483532	36	116	69	13	16	12	down
Ibat.Brg_v3.01EG003110	171.916	1.5833	0.209353	7.56282	3.94421e-14	3.58983e-12	88	89	101	271	240	215	up
Ibat.Brg_v3.01EG003190	288.84	-1.13687	0.167247	-6.79753	1.06428e-11	7.52017e-10	354	472	465	190	179	141	down
Ibat.Brg_v3.01EG003530	107.461	-1.25237	0.2609	-4.80021	1.58499e-06	5.63331e-05	148	175	168	63	72	45	down
Ibat.Brg_v3.01EG003800	995.881	13.5105	1.18226	11.4277	3.03994e-30	6.40297e-28	0	0	0	2071	1783	1744	up
Ibat.Brg_v3.01EG003820	13.4912	7.30671	1.39779	5.22732	1.71982e-07	7.22514e-06	0	0	0	21	39	17	up
Ibat.Brg_v3.01EG003920	193.276	1.41187	0.241016	5.85798	4.68542e-09	2.48247e-07	138	107	94	330	253	211	up
Ibat.Brg_v3.01EG004140	226.883	9.51977	1.03577	9.19103	3.89091e-20	5.24389e-18	0	0	2	408	480	388	up
Ibat.Brg_v3.01EG004170	130.4	7.71601	0.757749	10.1828	2.36641e-24	3.8568e-22	2	2	0	276	245	211	up
Ibat.Brg_v3.01EG006030	23.3391	-4.94971	1.1502	-4.30334	1.68244e-05	0.00048311	106	6	26	0	1	3	down
Ibat.Brg_v3.01EG007570	15.5486	3.53502	1.08395	3.26125	0.00110922	0.0178891	2	2	4	6	73	5	up
Ibat.Brg_v3.01EG010310	17.6983	3.30068	1.00754	3.27596	0.00105302	0.0171876	10	0	0	27	41	23	up
Ibat.Brg_v3.01EG016190	64.631	-1.12985	0.366474	-3.08303	0.00204904	0.0292627	99	105	83	56	33	26	down
Ibat.Brg_v3.01EG017160	89.7964	-1.16752	0.311703	-3.74561	0.000179954	0.00387722	142	119	138	53	41	60	down
Ibat.Brg_v3.01EG018050	33.7336	-3.33616	0.954431	-3.49544	0.000473281	0.00881072	17	188	6	9	2	6	down
Ibat.Brg_v3.01EG019220	86.3789	4.08332	0.387266	10.544	5.41571e-26	9.7546e-24	10	6	15	156	156	146	up
Ibat.Brg_v3.01EG019820	22.8305	2.51753	0.850771	2.95912	0.00308523	0.0401976	4	6	12	6	27	71	up
Ibat.Brg_v3.01EG020080	7.54291	3.91728	1.24071	3.1573	0.00159236	0.0239615	1	0	2	11	18	11	up
Ibat.Brg_v3.01EG023360	430.082	-1.65205	0.423496	-3.90097	9.58061e-05	0.00225655	711	652	739	279	230	88	down
Ibat.Brg_v3.01EG024920	60.3314	1.5501	0.520275	2.97939	0.0028882	0.0382103	35	35	29	89	27	129	up
Ibat.Brg_v3.01EG028470	55.9231	2.76507	0.566396	4.88186	1.05088e-06	3.8762e-05	11	22	14	29	166	81	up
Ibat.Brg_v3.01EG028630	87.8611	1.74459	0.570801	3.0564	0.00224016	0.0314446	43	55	33	41	61	258	up
Ibat.Brg_v3.01EG028850	216.012	2.62456	0.800532	3.27852	0.00104353	0.0170726	59	65	71	70	422	526	up
Ibat.Brg_v3.01EG028980	63.9148	-1.11696	0.386118	-2.8928	0.00381829	0.0474149	93	125	67	37	54	24	down
Ibat.Brg_v3.01EG031640	351.687	2.47952	0.163123	15.2003	3.52184e-52	1.32438e-49	103	109	134	592	610	481	up
Ibat.Brg_v3.01EG032750	1273.65	1.00113	0.0800519	12.506	6.91992e-36	1.75479e-33	847	1003	900	1627	1618	1526	up
Ibat.Brg_v3.01EG032940	1444.98	1.98181	0.094259	21.0252	3.86046e-98	2.78134e-95	517	716	665	2355	2104	2024	up
Ibat.Brg_v3.01EG032950	288.752	1.02906	0.157516	6.53304	6.44496e-11	4.29423e-09	194	234	188	393	383	317	up
Ibat.Brg_v3.01EG033020	17.0643	3.00441	0.75043	4.00359	6.23887e-05	0.00155699	7	2	3	25	32	28	up
Ibat.Brg_v3.01EG033040	314.549	2.51946	0.172677	14.5906	3.2234e-48	1.07572e-45	86	105	112	579	514	420	up
Ibat.Brg_v3.01EG033110	53.6503	-1.39006	0.418807	-3.31909	0.000903111	0.0151396	72	109	72	18	26	38	down
Ibat.Brg_v3.01EG033410	230.319	3.21125	0.226887	14.1535	1.77632e-45	5.45565e-43	55	51	39	457	422	299	up
Ibat.Brg_v3.01EG033480	137.377	2.48131	0.256822	9.66161	4.38904e-22	6.37196e-20	46	48	41	269	208	181	up
Ibat.Brg_v3.01EG034240	44.6662	-1.24244	0.426735	-2.91151	0.00359685	0.0452482	59	94	52	24	21	29	down
Ibat.Brg_v3.01EG034250	45.7674	2.35147	0.446391	5.26773	1.38123e-07	5.91551e-06	14	25	10	73	65	76	up
Ibat.Brg_v3.01EG034310	49.0381	3.30538	0.478222	6.9118	4.7855e-12	3.49682e-10	12	10	7	87	61	99	up
Ibat.Brg_v3.01EG034550	43.4705	1.21293	0.422073	2.87374	0.00405643	0.0497419	26	32	27	78	43	50	up
Ibat.Brg_v3.01EG034670	8.39118	6.62194	1.51687	4.36552	1.26819e-05	0.000374003	0	0	0	12	26	10	up
Ibat.Brg_v3.01EG035310	137.959	1.10162	0.234475	4.69823	2.62427e-06	8.94757e-05	89	118	78	186	176	167	up
Ibat.Brg_v3.01EG035480	1644.56	1.01483	0.0931471	10.8949	1.21929e-27	2.34988e-25	976	1381	1186	2133	2001	2037	up
Ibat.Brg_v3.01EG036540	20.1683	1.96861	0.626792	3.14078	0.001685	0.0250331	5	14	8	34	25	31	up
Ibat.Brg_v3.01EG037000	146.257	-1.61738	0.356692	-4.53439	5.777e-06	0.000183422	276	125	300	59	95	50	down
Ibat.Brg_v3.01EG037320	120.061	1.89585	0.335447	5.6517	1.58865e-08	7.8155e-07	28	56	82	164	168	196	up
Ibat.Brg_v3.01EG037540	31.8338	2.16214	0.492524	4.38992	1.13395e-05	0.000338298	10	18	10	51	54	42	up
Ibat.Brg_v3.01EG039340	15.8105	-2.52573	0.749639	-3.36927	0.00075368	0.0130213	26	42	20	4	3	6	down
Ibat.Brg_v3.01EG039900	28.718	2.75085	0.540003	5.09414	3.50324e-07	1.4022e-05	8	8	8	53	40	47	up
Ibat.Brg_v3.01EG040250	124.618	2.29473	0.278054	8.25283	1.54685e-16	1.6819e-14	35	66	37	213	185	184	up
Ibat.Brg_v3.01FG000260	44.1576	1.34837	0.396738	3.39863	0.000677238	0.0118574	25	34	22	65	63	51	up
Ibat.Brg_v3.01FG001150	25.0706	2.8328	0.572648	4.94685	7.54254e-07	2.8629e-05	6	7	7	44	44	36	up
Ibat.Brg_v3.01FG001730	20.3235	2.06589	0.644083	3.2075	0.00133896	0.0207771	12	7	6	22	32	37	up
Ibat.Brg_v3.01FG002160	40.0008	-1.50386	0.483345	-3.11136	0.00186229	0.027108	37	81	76	21	13	24	down
Ibat.Brg_v3.01FG002400	21.185	2.26518	0.631332	3.58793	0.000333311	0.00656696	5	13	6	26	43	30	up
Ibat.Brg_v3.01FG002680	92.6854	-1.07767	0.374266	-2.87944	0.00398387	0.0490054	158	176	73	70	42	55	down
Ibat.Brg_v3.01FG005140	24.4191	-3.65242	0.956708	-3.8177	0.000134703	0.00301605	47	7	89	6	0	4	down
Ibat.Brg_v3.01FG005430	145.324	1.62124	0.234392	6.91677	4.62045e-12	3.37942e-10	64	74	93	227	216	176	up
Ibat.Brg_v3.01FG006360	125.752	-1.07584	0.23835	-4.5137	6.37066e-06	0.000200701	163	213	178	70	80	77	down
Ibat.Brg_v3.01FG006550	590.91	12.7572	1.18384	10.7761	4.46182e-27	8.40982e-25	0	0	0	1132	1097	1086	up
Ibat.Brg_v3.01FG006560	273.661	5.46676	0.30767	17.7683	1.24443e-70	6.80374e-68	19	11	9	644	460	408	up
Ibat.Brg_v3.01FG006570	417.74	12.2576	1.18525	10.3418	4.55764e-25	7.73895e-23	0	0	0	842	829	685	up
Ibat.Brg_v3.01FG006580	69.9368	9.67818	1.2192	7.93817	2.05179e-15	2.07576e-13	0	0	0	131	130	131	up
Ibat.Brg_v3.01FG007330	85.7969	-1.32303	0.290631	-4.55227	5.3069e-06	0.000170037	121	143	133	45	42	50	down
Ibat.Brg_v3.01FG009220	509.047	1.02137	0.139973	7.29693	2.94406e-13	2.46158e-11	320	384	385	720	569	624	up
Ibat.Brg_v3.01FG011690	9.83489	2.768	0.933379	2.96557	0.00302126	0.0395431	4	1	3	15	17	16	up
Ibat.Brg_v3.01FG012170	49.7949	1.59089	0.438269	3.62994	0.000283485	0.00572596	16	46	20	64	76	70	up
Ibat.Brg_v3.01FG012340	43.5677	2.055	0.446922	4.59811	4.2635e-06	0.000139209	23	13	18	73	54	69	up
Ibat.Brg_v3.01FG013710	11.4368	3.75352	1.0228	3.66985	0.000242696	0.00503348	4	1	0	21	22	17	up
Ibat.Brg_v3.01FG014890	76.6694	1.67404	0.348512	4.80339	1.56001e-06	5.55479e-05	32	29	57	107	117	104	up
Ibat.Brg_v3.01FG015460	29.6871	-1.66743	0.533461	-3.12568	0.00177394	0.0260895	55	31	58	12	16	12	down
Ibat.Brg_v3.01FG015800	105.002	1.13937	0.282485	4.0334	5.4975e-05	0.00138952	64	80	69	137	179	95	up
Ibat.Brg_v3.01FG016740	72.9337	-4.80216	1.20104	-3.99835	6.37862e-05	0.00158878	238	10	189	4	4	6	down
Ibat.Brg_v3.01FG017170	9.62548	4.93681	1.45117	3.40196	0.000669051	0.0117381	0	1	1	4	42	8	up
Ibat.Brg_v3.01FG018020	87.3789	-1.06019	0.324309	-3.26909	0.00107894	0.0174996	89	137	159	44	70	46	down
Ibat.Brg_v3.01FG018150	220.004	3.22243	0.228452	14.1055	3.51266e-45	1.07457e-42	38	48	52	386	328	396	up
Ibat.Brg_v3.01FG019840	71.7034	-2.97581	0.396687	-7.50166	6.30141e-14	5.61591e-12	157	117	134	17	21	8	down
Ibat.Brg_v3.01FG020790	17.3101	-2.92918	0.97695	-2.99829	0.00271502	0.0364699	66	6	22	4	1	6	down
Ibat.Brg_v3.01FG021390	184.043	1.09429	0.207316	5.27835	1.30355e-07	5.6046e-06	132	115	131	258	225	221	up
Ibat.Brg_v3.01FG023080	181.571	1.03593	0.275239	3.76374	0.00016739	0.003637	110	125	150	174	200	300	up
Ibat.Brg_v3.01FG023270	13.4665	-3.30158	0.853353	-3.86895	0.000109305	0.00251821	20	34	26	2	3	2	down
Ibat.Brg_v3.01FG023400	74.4888	-1.98141	0.537188	-3.68848	0.000225598	0.00472206	200	33	138	30	32	23	down
Ibat.Brg_v3.01FG024140	15.652	4.6222	0.967303	4.77844	1.76661e-06	6.21296e-05	0	2	2	32	29	24	up
Ibat.Brg_v3.01FG024850	20.7539	-2.06681	0.700506	-2.95045	0.00317308	0.0410286	17	44	49	4	6	12	down
Ibat.Brg_v3.01FG025190	733.714	2.42798	0.126339	19.218	2.61462e-82	1.63871e-79	276	243	222	1218	1222	1044	up
Ibat.Brg_v3.01FG026500	1458.66	1.89186	0.0785042	24.0988	2.57238e-128	2.47881e-125	577	741	692	2203	2299	1968	up
Ibat.Brg_v3.01FG026600	21.2441	2.44925	0.630789	3.88284	0.000103244	0.00239803	10	5	6	28	42	31	up
Ibat.Brg_v3.01FG026620	97.3755	3.59537	0.344022	10.451	1.45034e-25	2.54106e-23	15	12	21	195	151	159	up
Ibat.Brg_v3.01FG026970	48.9084	2.82542	0.501448	5.63452	1.75552e-08	8.59801e-07	8	26	6	81	75	84	up
Ibat.Brg_v3.01FG027100	96.554	2.46497	0.316301	7.79314	6.53656e-15	6.33044e-13	24	31	41	168	129	160	up
Ibat.Brg_v3.01FG027150	44.8527	1.37229	0.436489	3.14393	0.00166693	0.024822	18	40	24	52	56	72	up
Ibat.Brg_v3.01FG027430	56.0575	1.18993	0.391407	3.04014	0.00236469	0.0327455	30	43	38	53	71	92	up
Ibat.Brg_v3.01FG027730	83.3376	1.16257	0.323419	3.59462	0.000324871	0.00642327	34	76	59	110	126	90	up
Ibat.Brg_v3.01FG027880	1329.6	1.23706	0.088247	14.0181	1.20728e-44	3.66416e-42	767	1013	794	1891	1801	1568	up
Ibat.Brg_v3.01FG028210	15.4584	3.21024	0.868048	3.69823	0.000217108	0.00456295	0	6	4	24	18	35	up
Ibat.Brg_v3.01FG028390	2783.07	1.59518	0.0928622	17.1779	3.88517e-66	1.90769e-63	1217	1696	1589	4177	3631	3911	up
Ibat.Brg_v3.01FG028460	86.8054	2.44181	0.316903	7.70523	1.30605e-14	1.23085e-12	22	38	28	121	157	134	up
Ibat.Brg_v3.01FG028530	40.0967	1.52856	0.482093	3.17068	0.00152083	0.0230712	32	22	12	46	66	55	up
Ibat.Brg_v3.01FG029320	112.846	-1.07971	0.272907	-3.95632	7.61122e-05	0.00184861	131	174	193	61	88	56	down
Ibat.Brg_v3.01FG029710	565.746	2.65748	0.12728	20.8789	8.32022e-97	5.83096e-94	169	162	169	942	982	826	up
Ibat.Brg_v3.01FG030850	239.284	1.28888	0.183811	7.01197	2.34981e-12	1.7587e-10	130	177	145	374	325	261	up
Ibat.Brg_v3.01FG032370	24.914	2.15693	0.630638	3.42023	0.000625681	0.0110933	16	7	6	33	58	25	up
Ibat.Brg_v3.01FG033070	26.5424	-4.57405	1.07758	-4.24475	2.18834e-05	0.000607477	12	152	11	4	0	2	down
Ibat.Brg_v3.02AG000150	20.1545	3.42637	1.07477	3.18802	0.00143252	0.0219637	3	2	6	20	1	76	up
Ibat.Brg_v3.02AG002450	38.3598	3.66852	0.583212	6.29019	3.1707e-10	1.93838e-08	4	2	12	69	62	68	up
Ibat.Brg_v3.02AG003210	12.8703	7.23799	1.39189	5.20011	1.99174e-07	8.30861e-06	0	0	0	31	24	18	up
Ibat.Brg_v3.02AG003220	7115.16	1.40692	0.0480158	29.3013	9.99472e-189	1.60519e-185	3688	4735	4231	10263	10039	8792	up
Ibat.Brg_v3.02AG003380	36.1956	-3.00817	0.687209	-4.37738	1.20117e-05	0.000356009	119	48	35	2	8	12	down
Ibat.Brg_v3.02AG003660	54.9425	-1.09735	0.362985	-3.02312	0.00250181	0.034208	83	85	74	42	32	25	down
Ibat.Brg_v3.02AG004260	69.0707	2.51566	0.354925	7.08787	1.3619e-12	1.05943e-10	15	27	25	111	103	115	up
Ibat.Brg_v3.02AG005550	1960.49	-1.69259	0.0814478	-20.7813	6.38994e-96	4.43784e-93	2939	3522	3251	954	972	694	down
Ibat.Brg_v3.02AG005650	17.511	2.15682	0.737902	2.92291	0.0034678	0.0440126	4	10	7	21	15	42	up
Ibat.Brg_v3.02AG007450	107.768	-1.28125	0.279006	-4.5922	4.386e-06	0.000142786	183	147	160	65	52	59	down
Ibat.Brg_v3.02AG007710	14.373	-5.31986	1.55886	-3.41266	0.000643325	0.0113617	77	6	2	2	0	0	down
Ibat.Brg_v3.02AG008630	157.094	1.13458	0.216924	5.23028	1.6925e-07	7.12198e-06	110	104	103	193	210	202	up
Ibat.Brg_v3.02AG009050	10.4506	2.88468	0.903496	3.1928	0.00140899	0.0216843	3	2	3	15	15	21	up
Ibat.Brg_v3.02AG010130	66.6707	1.70866	0.561832	3.04122	0.00235621	0.0326515	27	60	16	116	30	134	up
Ibat.Brg_v3.02AG010350	9.07986	3.13956	1.02177	3.07267	0.00212152	0.0301138	2	2	2	15	25	7	up
Ibat.Brg_v3.02AG010710	706.397	1.38934	0.102648	13.535	9.7164e-42	2.79491e-39	384	453	428	962	1052	866	up
Ibat.Brg_v3.02AG010870	67.4981	1.1975	0.340301	3.51896	0.000433247	0.00816191	33	43	57	100	80	84	up
Ibat.Brg_v3.02AG011870	25.282	-3.0445	0.994025	-3.0628	0.00219275	0.0308996	6	10	130	4	3	8	down
Ibat.Brg_v3.02AG015250	67.2992	1.50245	0.43089	3.48684	0.000488762	0.00904216	25	32	57	144	85	55	up
Ibat.Brg_v3.02AG019980	60.1961	1.40606	0.364031	3.86247	0.000112245	0.00257683	34	41	32	111	70	66	up
Ibat.Brg_v3.02AG020400	16.5348	3.27835	0.779893	4.20359	2.62717e-05	0.000718186	2	2	6	26	37	22	up
Ibat.Brg_v3.02AG020730	49.6317	2.37462	0.397952	5.96711	2.41494e-09	1.33358e-07	16	19	17	69	91	74	up
Ibat.Brg_v3.02AG021610	110.684	1.43227	0.290733	4.92641	8.37537e-07	3.14495e-05	52	60	82	185	167	107	up
Ibat.Brg_v3.02AG022770	112.668	-1.09326	0.318248	-3.43524	0.000592019	0.0106235	148	235	119	74	88	43	down
Ibat.Brg_v3.02BG001270	22.0485	2.01154	0.630041	3.19271	0.00140943	0.0216843	5	17	7	44	29	27	up
Ibat.Brg_v3.02BG002540	1033.61	2.1139	0.0979951	21.5715	3.32594e-103	2.58986e-100	372	453	433	1765	1552	1412	up
Ibat.Brg_v3.02BG002850	33.3594	-1.68767	0.479807	-3.5174	0.000435797	0.00819805	53	59	53	15	21	9	down
Ibat.Brg_v3.02BG003630	527.564	1.7354	0.121661	14.2641	3.66041e-46	1.14708e-43	248	262	278	777	799	706	up
Ibat.Brg_v3.02BG003940	37.4283	1.63291	0.514933	3.17111	0.0015186	0.0230496	28	12	18	45	79	37	up
Ibat.Brg_v3.02BG004000	40.5409	2.09347	0.43427	4.82066	1.43081e-06	5.15424e-05	15	20	15	53	75	57	up
Ibat.Brg_v3.02BG004300	33.3144	-2.71934	0.933666	-2.91254	0.00358506	0.0451294	4	179	17	6	13	6	down
Ibat.Brg_v3.02BG004650	39.0842	2.28311	0.5729	3.98518	6.74278e-05	0.0016687	16	14	13	64	104	20	up
Ibat.Brg_v3.02BG005010	15.6092	2.759	0.722475	3.81882	0.00013409	0.00300494	4	4	5	30	27	20	up
Ibat.Brg_v3.02BG007140	120.548	1.68573	0.27195	6.19868	5.69375e-10	3.39205e-08	42	64	80	183	171	163	up
Ibat.Brg_v3.02BG008540	8.01612	5.56302	1.5295	3.63714	0.000275678	0.00559706	0	0	1	6	22	16	up
Ibat.Brg_v3.02BG008860	64.1324	-1.09519	0.366546	-2.98787	0.00280925	0.0374615	115	78	86	35	36	43	down
Ibat.Brg_v3.02BG010160	18.499	2.01458	0.63812	3.15705	0.00159374	0.0239682	6	11	7	24	37	23	up
Ibat.Brg_v3.02BG010900	84.2395	1.08403	0.320622	3.38102	0.000722168	0.0125557	51	79	46	97	100	122	up
Ibat.Brg_v3.02BG011240	122.551	-1.02568	0.252627	-4.06007	4.90578e-05	0.0012556	177	191	164	80	94	55	down
Ibat.Brg_v3.02BG011380	48.1335	2.70394	0.481103	5.62029	1.90637e-08	9.2779e-07	9	21	12	108	50	76	up
Ibat.Brg_v3.02BG011400	211.345	5.33634	0.797003	6.69551	2.1492e-11	1.48589e-09	4	4	25	418	406	339	up
Ibat.Brg_v3.02BG012240	258.446	-1.06923	0.181436	-5.89315	3.78898e-09	2.02983e-07	317	421	399	141	160	166	down
Ibat.Brg_v3.02BG012270	22.5194	6.18366	1.16824	5.29316	1.20223e-07	5.19508e-06	0	2	0	34	51	40	up
Ibat.Brg_v3.02BG012360	209.268	1.64888	0.19438	8.48277	2.19892e-17	2.52255e-15	107	125	96	340	298	257	up
Ibat.Brg_v3.02BG012580	2326.21	1.70157	0.0636554	26.7309	2.05889e-157	2.60196e-154	1143	1263	1135	3522	3490	3008	up
Ibat.Brg_v3.02BG012590	310.093	2.97038	0.174767	16.9962	8.75452e-65	4.24457e-62	62	86	80	567	547	439	up
Ibat.Brg_v3.02BG012600	142.213	1.0965	0.234256	4.68079	2.85774e-06	9.64973e-05	77	128	91	195	194	158	up
Ibat.Brg_v3.02BG013020	2921.95	-1.04478	0.0618784	-16.8844	5.86493e-64	2.79091e-61	3754	4639	4378	1946	1819	1608	down
Ibat.Brg_v3.02BG020350	39.119	2.36009	0.581132	4.0612	4.88211e-05	0.00125037	7	20	15	28	108	50	up
Ibat.Brg_v3.02BG021660	232.179	1.99018	0.195513	10.1793	2.45344e-24	3.9902e-22	105	113	84	324	376	341	up
Ibat.Brg_v3.02BG026390	159.519	1.30695	0.273355	4.78115	1.74294e-06	6.14091e-05	97	136	66	257	179	202	up
Ibat.Brg_v3.02BG026400	130.018	2.27428	0.280419	8.11028	5.05035e-16	5.3775e-14	34	72	40	210	197	198	up
Ibat.Brg_v3.02BG026970	89.2941	1.71758	0.310337	5.53456	3.12016e-08	1.47025e-06	34	41	60	128	151	108	up
Ibat.Brg_v3.02BG027290	298.761	2.70351	0.184759	14.6327	1.73853e-48	5.82708e-46	66	86	106	518	489	450	up
Ibat.Brg_v3.02BG027460	386.097	1.04071	0.158459	6.56765	5.11147e-11	3.43243e-09	290	248	275	493	562	412	up
Ibat.Brg_v3.02BG028300	253.496	1.20823	0.16743	7.21638	5.33915e-13	4.33714e-11	148	172	176	326	350	318	up
Ibat.Brg_v3.02BG028440	28.6711	-1.60104	0.529159	-3.02563	0.00248118	0.0339861	41	66	34	10	17	13	down
Ibat.Brg_v3.02BG028730	28.38	-1.52227	0.525488	-2.89687	0.0037691	0.0469554	33	63	42	16	10	15	down
Ibat.Brg_v3.02BG029530	62.188	-1.35532	0.354721	-3.8208	0.000133021	0.00298272	71	104	116	29	35	34	down
Ibat.Brg_v3.02BG029740	708.766	2.89649	0.13033	22.2242	2.00499e-109	1.64431e-106	147	201	197	1089	1264	1154	up
Ibat.Brg_v3.02BG030120	41.3298	3.00304	0.68553	4.38061	1.18346e-05	0.000351708	5	11	14	154	28	29	up
Ibat.Brg_v3.02BG030470	179.006	2.47585	0.220628	11.2218	3.18598e-29	6.46335e-27	59	55	62	291	274	285	up
Ibat.Brg_v3.02BG030620	226.256	2.60572	0.195509	13.3279	1.59293e-40	4.43317e-38	60	73	74	409	355	330	up
Ibat.Brg_v3.02CG001150	219.485	1.73506	0.200313	8.66171	4.6474e-18	5.52031e-16	89	113	127	288	367	295	up
Ibat.Brg_v3.02CG001220	256.878	-1.00041	0.18839	-5.31033	1.09429e-07	4.76335e-06	380	405	323	185	179	121	down
Ibat.Brg_v3.02CG001310	40.6184	1.9063	0.531534	3.58641	0.000335258	0.00659985	20	18	17	31	51	93	up
Ibat.Brg_v3.02CG001390	346.831	1.5695	0.150889	10.4017	2.43529e-25	4.20935e-23	166	188	212	490	522	448	up
Ibat.Brg_v3.02CG002490	4656.55	1.0173	0.0555264	18.3211	5.61849e-75	3.30633e-72	3269	3477	3211	5958	6375	5229	up
Ibat.Brg_v3.02CG002780	69.7787	-1.61492	0.437394	-3.69215	0.000222367	0.00466075	169	110	56	36	35	26	down
Ibat.Brg_v3.02CG004540	98.1694	1.94509	0.277076	7.02007	2.21754e-12	1.67107e-10	39	42	50	158	158	124	up
Ibat.Brg_v3.02CG005450	15.1094	2.27021	0.786136	2.88781	0.0038793	0.0479948	2	6	9	38	16	17	up
Ibat.Brg_v3.02CG005800	75.8449	2.93291	0.351079	8.35399	6.59953e-17	7.32025e-15	17	23	17	136	108	131	up
Ibat.Brg_v3.02CG009720	108.217	1.20333	0.277262	4.34003	1.42464e-05	0.000414475	48	83	83	160	152	115	up
Ibat.Brg_v3.02CG009920	1427.39	1.72473	0.0770393	22.3877	5.18277e-111	4.29612e-108	664	803	683	2098	2166	1902	up
Ibat.Brg_v3.02CG009990	348.898	1.84774	0.152456	12.1199	8.28847e-34	1.9782e-31	153	165	173	522	585	435	up
Ibat.Brg_v3.02CG010340	85.8931	-1.02295	0.316504	-3.23204	0.00122911	0.0193847	84	141	151	49	65	46	down
Ibat.Brg_v3.02CG010430	283.964	-1.00699	0.170039	-5.9221	3.17853e-09	1.72924e-07	417	406	400	161	198	171	down
Ibat.Brg_v3.02CG011840	90.1644	-1.1219	0.279492	-4.01405	5.96867e-05	0.00149634	124	139	137	64	50	46	down
Ibat.Brg_v3.02CG013070	72.2049	-1.38656	0.344566	-4.02407	5.72011e-05	0.00143964	115	115	107	25	48	39	down
Ibat.Brg_v3.02CG013170	125.912	-1.32192	0.340046	-3.88747	0.000101296	0.00236083	191	295	102	70	66	66	down
Ibat.Brg_v3.02CG016110	29.8959	2.06582	0.567054	3.64307	0.000269407	0.00549289	11	7	19	59	31	45	up
Ibat.Brg_v3.02CG023690	33.8685	2.16599	0.680643	3.18226	0.00146129	0.0222938	8	11	21	13	55	83	up
Ibat.Brg_v3.02CG023720	14.1956	-7.17333	1.56742	-4.57652	4.72785e-06	0.000153267	37	2	50	0	0	0	down
Ibat.Brg_v3.02CG025120	45.3626	1.21092	0.398438	3.03916	0.00237239	0.0328344	35	29	24	66	57	55	up
Ibat.Brg_v3.02CG025830	101.372	2.40865	0.297397	8.09908	5.53744e-16	5.87182e-14	29	34	41	149	152	175	up
Ibat.Brg_v3.02CG026880	227.033	1.4488	0.187082	7.74422	9.61731e-15	9.17573e-13	114	159	123	297	361	279	up
Ibat.Brg_v3.02CG027280	77.3184	-1.21915	0.305747	-3.98744	6.67914e-05	0.00165614	110	125	115	37	46	47	down
Ibat.Brg_v3.02CG027720	50.7325	-1.58115	0.41416	-3.81772	0.000134691	0.00301605	54	99	96	20	33	19	down
Ibat.Brg_v3.02CG027940	141.704	-1.1821	0.224789	-5.25874	1.45048e-07	6.18119e-06	205	219	212	94	77	73	down
Ibat.Brg_v3.02CG028210	48.6654	1.92565	0.458684	4.19819	2.69054e-05	0.000731877	14	39	14	87	64	66	up
Ibat.Brg_v3.02CG028260	23.734	2.69506	0.793357	3.39703	0.000681214	0.0119216	3	11	7	86	15	17	up
Ibat.Brg_v3.02CG028420	26.124	3.37768	0.924418	3.65384	0.000258346	0.00530807	3	7	5	17	6	102	up
Ibat.Brg_v3.02CG028650	95.1991	2.78918	0.308793	9.03252	1.67769e-19	2.17001e-17	22	28	28	164	138	163	up
Ibat.Brg_v3.02CG028690	60.2743	2.80252	0.657138	4.26473	2.00147e-05	0.000561679	8	26	16	22	221	60	up
Ibat.Brg_v3.02CG029000	21.7064	2.5256	0.728064	3.46892	0.00052255	0.00956849	3	8	10	13	41	48	up
Ibat.Brg_v3.02CG029030	17.8557	2.51282	0.815047	3.08304	0.00204897	0.0292627	8	4	5	60	14	13	up
Ibat.Brg_v3.02DG000500	53.2674	-1.06911	0.358548	-2.98177	0.00286583	0.0380169	66	80	88	32	37	28	down
Ibat.Brg_v3.02DG000840	115.177	3.75648	0.890433	4.21872	2.45697e-05	0.000675009	20	2	28	220	153	224	up
Ibat.Brg_v3.02DG001210	100.223	1.0529	0.301706	3.48981	0.000483356	0.00895288	71	95	46	123	135	122	up
Ibat.Brg_v3.02DG002380	38.4186	1.9469	0.59964	3.24678	0.00116717	0.0186135	21	18	12	90	72	15	up
Ibat.Brg_v3.02DG002500	48.1674	-1.41761	0.418083	-3.39073	0.000697057	0.0121602	77	73	76	16	36	22	down
Ibat.Brg_v3.02DG002560	4216.94	1.48818	0.0493403	30.1615	7.57922e-200	1.32791e-196	2209	2620	2355	6208	6059	5244	up
Ibat.Brg_v3.02DG002650	219.318	1.1573	0.258451	4.47783	7.5404e-06	0.000233637	98	134	209	240	336	275	up
Ibat.Brg_v3.02DG002890	148.886	1.66762	0.224238	7.4368	1.03156e-13	9.01618e-12	60	89	83	226	220	192	up
Ibat.Brg_v3.02DG004080	100.111	1.02923	0.259114	3.97212	7.12372e-05	0.00174672	63	84	67	129	139	111	up
Ibat.Brg_v3.02DG005260	15.1192	3.10147	0.872298	3.55552	0.000377238	0.00727396	4	0	6	19	25	31	up
Ibat.Brg_v3.02DG005860	11.5481	-6.88055	1.65767	-4.15074	3.31407e-05	0.000882494	9	68	2	0	0	0	down
Ibat.Brg_v3.02DG006110	35.0764	1.79312	0.47659	3.7624	0.000168289	0.00365346	17	21	13	41	70	43	up
Ibat.Brg_v3.02DG006220	18.6372	2.10203	0.655039	3.20902	0.0013319	0.0206799	4	8	11	34	32	20	up
Ibat.Brg_v3.02DG006490	187.967	1.28797	0.248273	5.18772	2.12881e-07	8.83735e-06	72	137	148	269	231	248	up
Ibat.Brg_v3.02DG006840	46.5546	1.36359	0.426151	3.19979	0.00137528	0.0212551	17	30	38	80	54	55	up
Ibat.Brg_v3.02DG007730	37.5634	2.03013	0.519981	3.90424	9.45222e-05	0.0022304	6	28	15	52	57	60	up
Ibat.Brg_v3.02DG007740	26.163	4.32771	0.785162	5.51187	3.55034e-08	1.66178e-06	1	0	7	58	46	37	up
Ibat.Brg_v3.02DG008870	55.8821	-1.61549	0.368699	-4.3816	1.1781e-05	0.000350686	80	110	84	21	28	28	down
Ibat.Brg_v3.02DG009060	246.146	1.2263	0.21663	5.66079	1.50681e-08	7.42709e-07	103	194	185	342	302	323	up
Ibat.Brg_v3.02DG009080	119.308	1.16663	0.274846	4.24468	2.18909e-05	0.000607477	57	113	71	153	154	156	up
Ibat.Brg_v3.02DG009430	42.7044	-2.24049	0.453143	-4.94432	7.64098e-07	2.89741e-05	79	72	76	9	20	13	down
Ibat.Brg_v3.02DG009720	13.903	5.48879	1.29305	4.24484	2.18753e-05	0.000607477	0	2	0	45	20	13	up
Ibat.Brg_v3.02DG010470	229.24	1.14485	0.186751	6.13038	8.76669e-10	5.08139e-08	123	187	155	286	307	293	up
Ibat.Brg_v3.02DG010640	19.6443	2.53434	0.662781	3.8238	0.00013141	0.00295003	4	10	5	43	28	24	up
Ibat.Brg_v3.02DG010940	122.588	1.27538	0.274693	4.64292	3.43518e-06	0.000114244	53	109	73	175	152	160	up
Ibat.Brg_v3.02DG010950	54.8306	3.76234	0.483019	7.78921	6.743e-15	6.51401e-13	12	3	9	111	89	87	up
Ibat.Brg_v3.02DG010970	32.161	1.57544	0.512859	3.07188	0.00212715	0.030177	22	20	10	36	46	52	up
Ibat.Brg_v3.02DG013510	16.7192	2.50908	0.793595	3.16167	0.00156869	0.0236655	6	4	6	9	30	39	up
Ibat.Brg_v3.02DG014760	26.4418	2.28815	0.547865	4.17649	2.96041e-05	0.000795741	9	9	11	37	37	48	up
Ibat.Brg_v3.02DG016560	74.4756	1.38906	0.421857	3.29272	0.000992242	0.0163654	33	46	55	112	156	43	up
Ibat.Brg_v3.02DG020000	31.1412	1.60483	0.529864	3.02875	0.00245566	0.0337325	14	17	19	28	70	35	up
Ibat.Brg_v3.02DG022030	300.694	-1.52036	0.501671	-3.03059	0.00244078	0.033558	703	491	228	169	126	141	down
Ibat.Brg_v3.02DG022120	78.134	-4.58226	1.57919	-2.90166	0.00371194	0.0464243	6	491	24	4	11	3	down
Ibat.Brg_v3.02DG022920	44.9443	1.2451	0.41149	3.02583	0.00247953	0.0339816	24	38	25	47	75	56	up
Ibat.Brg_v3.02DG023640	26.6944	2.39957	0.590299	4.06501	4.80311e-05	0.00123301	6	16	6	31	52	43	up
Ibat.Brg_v3.02DG023790	85.2036	-1.47185	0.505778	-2.91007	0.00361345	0.04542	256	72	62	46	43	38	down
Ibat.Brg_v3.02EG002400	15.4386	5.01344	1.08407	4.62463	3.75265e-06	0.000124213	1	1	1	14	41	29	up
Ibat.Brg_v3.02EG002570	257.038	1.86677	0.18876	9.88966	4.61606e-23	7.08869e-21	110	105	142	374	397	362	up
Ibat.Brg_v3.02EG003540	449.152	1.08867	0.138771	7.84506	4.32732e-15	4.2227e-13	269	332	331	665	554	503	up
Ibat.Brg_v3.02EG003550	20.5499	2.60605	0.872297	2.98757	0.00281204	0.0374907	15	3	0	26	41	32	up
Ibat.Brg_v3.02EG004070	47.0507	-1.16754	0.391588	-2.98154	0.00286801	0.0380345	53	90	70	30	30	22	down
Ibat.Brg_v3.02EG005140	12.8045	2.59229	0.836387	3.09939	0.00193917	0.0279578	1	6	5	20	16	25	up
Ibat.Brg_v3.02EG005200	36.5409	1.59245	0.473056	3.36631	0.000761812	0.0131383	11	31	18	56	54	45	up
Ibat.Brg_v3.02EG005900	249.29	1.08125	0.169218	6.3897	1.66213e-10	1.04186e-08	147	183	189	323	331	298	up
Ibat.Brg_v3.02EG006330	111.353	1.30569	0.256556	5.08932	3.59354e-07	1.43611e-05	65	63	79	148	153	144	up
Ibat.Brg_v3.02EG006410	73.8322	1.02579	0.322331	3.18242	0.00146051	0.0222908	60	44	52	105	86	87	up
Ibat.Brg_v3.02EG006580	137.775	1.37469	0.25127	5.47097	4.47578e-08	2.06486e-06	60	98	92	212	164	182	up
Ibat.Brg_v3.02EG007160	91.4644	1.24185	0.333821	3.7201	0.000199146	0.00423274	39	90	50	149	126	90	up
Ibat.Brg_v3.02EG007390	96.3322	1.12669	0.35687	3.15715	0.00159319	0.0239682	45	84	69	172	75	123	up
Ibat.Brg_v3.02EG007650	35.5336	7.73377	1.25579	6.15848	7.34457e-10	4.30213e-08	0	0	1	75	63	61	up
Ibat.Brg_v3.02EG008360	465.295	1.03956	0.141959	7.32293	2.42606e-13	2.05297e-11	267	382	342	665	554	542	up
Ibat.Brg_v3.02EG008630	287.215	1.16029	0.187485	6.18872	6.06562e-10	3.59691e-08	143	231	205	333	397	382	up
Ibat.Brg_v3.02EG008640	91.5707	1.00157	0.285593	3.50697	0.000453239	0.00848681	72	57	67	108	126	109	up
Ibat.Brg_v3.02EG008940	161.003	1.98303	0.230181	8.6151	6.98831e-18	8.22487e-16	79	61	69	240	263	220	up
Ibat.Brg_v3.02EG009400	2881.37	-1.0686	0.0567642	-18.8252	4.69583e-79	2.85041e-76	4021	4459	4147	1813	1810	1611	down
Ibat.Brg_v3.02EG010770	62.4252	-1.34204	0.333044	-4.0296	5.58716e-05	0.00140987	91	107	92	32	33	34	down
Ibat.Brg_v3.02EG011260	47.0812	2.26008	0.741672	3.04728	0.00230921	0.0322203	11	17	25	21	190	17	up
Ibat.Brg_v3.02EG013460	56.5405	-1.60671	0.374052	-4.2954	1.74375e-05	0.000497505	80	86	109	24	24	30	down
Ibat.Brg_v3.02EG015770	13.2	-2.37313	0.764786	-3.10299	0.00191576	0.0277136	20	28	24	4	4	4	down
Ibat.Brg_v3.02EG016180	57.3638	3.39882	0.4501	7.55125	4.31088e-14	3.91432e-12	10	8	14	104	73	114	up
Ibat.Brg_v3.02EG017130	22.8318	-5.94279	1.3377	-4.44255	8.88991e-06	0.000271415	44	5	93	0	0	2	down
Ibat.Brg_v3.02EG017750	13.2982	4.75246	1.29373	3.67344	0.000239304	0.00496982	2	0	1	3	15	50	up
Ibat.Brg_v3.02EG021880	89.2964	1.16143	0.355805	3.26423	0.00109762	0.0177441	32	58	90	108	136	104	up
Ibat.Brg_v3.02EG023740	42.8936	2.37469	0.481754	4.92925	8.25454e-07	3.10714e-05	15	20	10	69	46	84	up
Ibat.Brg_v3.02EG026100	62.4157	-1.11679	0.367002	-3.04301	0.00234227	0.0325558	93	96	87	25	52	34	down
Ibat.Brg_v3.02EG026270	351.953	2.82401	0.158828	17.7803	1.00473e-70	5.53247e-68	90	98	94	591	646	503	up
Ibat.Brg_v3.02FG000450	268.206	3.20318	0.216425	14.8004	1.45588e-49	5.10153e-47	36	61	74	496	444	421	up
Ibat.Brg_v3.02FG000820	505.007	1.21994	0.121389	10.0498	9.20255e-24	1.46575e-21	306	371	307	696	718	579	up
Ibat.Brg_v3.02FG002000	62.9457	1.77422	0.461981	3.84047	0.000122801	0.00278351	16	46	32	152	71	55	up
Ibat.Brg_v3.02FG002150	209.828	-1.04468	0.198606	-5.26004	1.44023e-07	6.1443e-06	322	314	276	150	133	104	down
Ibat.Brg_v3.02FG002220	7036.51	1.46006	0.0626312	23.312	3.34757e-120	3.03605e-117	3433	4661	4105	10547	9569	8918	up
Ibat.Brg_v3.02FG002310	30.0027	1.95455	0.596776	3.27518	0.00105596	0.0172247	4	24	13	60	46	30	up
Ibat.Brg_v3.02FG002600	524.315	1.66002	0.124952	13.2853	2.81759e-40	7.78524e-38	267	298	251	730	826	686	up
Ibat.Brg_v3.02FG003520	482.465	1.0342	0.134411	7.69431	1.42255e-14	1.3325e-12	341	374	309	635	584	599	up
Ibat.Brg_v3.02FG003530	53.5273	2.41876	0.422837	5.72032	1.06326e-08	5.37132e-07	21	11	22	79	107	69	up
Ibat.Brg_v3.02FG003540	2369.62	1.112	0.0653194	17.0241	5.44394e-65	2.65616e-62	1531	1753	1572	3120	3374	2646	up
Ibat.Brg_v3.02FG003950	327.701	2.20158	0.461785	4.76755	1.8648e-06	6.5196e-05	144	121	111	711	258	532	up
Ibat.Brg_v3.02FG004610	39.4405	3.08631	0.530277	5.82019	5.87808e-09	3.08259e-07	5	9	13	60	50	85	up
Ibat.Brg_v3.02FG005990	133.429	1.46698	0.279088	5.25634	1.46947e-07	6.25612e-06	60	93	78	238	137	175	up
Ibat.Brg_v3.02FG006400	71.0346	-1.15945	0.35633	-3.25387	0.00113845	0.0182612	77	119	124	58	32	34	down
Ibat.Brg_v3.02FG007070	47.0759	2.74404	0.76278	3.59742	0.000321395	0.00637251	8	17	15	22	18	175	up
Ibat.Brg_v3.02FG008050	95.5031	1.12877	0.296165	3.8113	0.000138237	0.00308263	56	75	64	157	133	83	up
Ibat.Brg_v3.02FG008330	9.19017	2.93735	1.01731	2.88738	0.00388468	0.0480305	0	3	4	15	18	13	up
Ibat.Brg_v3.02FG008710	36.584	2.73837	0.477062	5.74008	9.46336e-09	4.81221e-07	9	13	9	68	56	55	up
Ibat.Brg_v3.02FG009310	65.5065	1.11971	0.344652	3.24882	0.00115885	0.0185229	36	61	38	103	84	67	up
Ibat.Brg_v3.02FG009530	192.979	1.12857	0.197841	5.70444	1.16726e-08	5.87361e-07	105	150	139	235	276	234	up
Ibat.Brg_v3.02FG009540	118.98	1.93176	0.25399	7.60565	2.83467e-14	2.61081e-12	52	60	48	172	176	180	up
Ibat.Brg_v3.02FG009550	1139.43	1.10363	0.137444	8.02963	9.77651e-16	1.013e-13	562	894	904	1329	1541	1487	up
Ibat.Brg_v3.02FG009910	111.43	1.92279	0.469624	4.09432	4.2341e-05	0.00110012	45	56	50	58	332	114	up
Ibat.Brg_v3.02FG010250	401.844	1.08073	0.137727	7.84695	4.26285e-15	4.16506e-13	282	279	272	555	520	461	up
Ibat.Brg_v3.02FG010310	7.96817	4.68271	1.56653	2.98922	0.00279693	0.0373424	0	2	0	26	18	1	up
Ibat.Brg_v3.02FG010330	92.6314	5.45906	1.05575	5.1708	2.33094e-07	9.61796e-06	0	12	2	181	174	155	up
Ibat.Brg_v3.02FG010860	12.5691	2.51122	0.829594	3.02705	0.00246954	0.0338971	4	2	6	17	16	26	up
Ibat.Brg_v3.02FG011090	307.982	1.04232	0.166868	6.2464	4.2002e-10	2.53756e-08	175	253	227	416	363	384	up
Ibat.Brg_v3.02FG011410	180.22	1.48905	0.291083	5.11555	3.12831e-07	1.26263e-05	50	140	122	271	291	192	up
Ibat.Brg_v3.02FG011430	65.8799	1.22901	0.340445	3.61	0.000306192	0.00611988	28	56	45	87	92	81	up
Ibat.Brg_v3.02FG012100	18.3147	-3.78755	1.20194	-3.1512	0.00162599	0.0242922	9	3	98	0	5	2	down
Ibat.Brg_v3.02FG014470	1655.87	-1.04223	0.069217	-15.0575	3.08257e-51	1.14248e-48	2188	2667	2376	1065	1063	920	down
Ibat.Brg_v3.02FG017310	16.1257	3.40704	1.14604	2.97288	0.0029502	0.0388639	4	5	0	8	4	65	up
Ibat.Brg_v3.02FG020170	52.0276	-3.87544	0.522785	-7.41305	1.23425e-13	1.07149e-11	107	109	99	6	12	1	down
Ibat.Brg_v3.02FG025810	54.2987	2.61064	0.458433	5.69469	1.23595e-08	6.19907e-07	6	18	26	90	79	92	up
Ibat.Brg_v3.02FG026120	176.232	2.99869	0.262039	11.4437	2.52954e-30	5.37196e-28	31	39	57	302	261	312	up
Ibat.Brg_v3.02FG026980	206.476	1.44561	0.190141	7.60283	2.89727e-14	2.66211e-12	105	118	136	300	291	259	up
Ibat.Brg_v3.02FG028860	119.978	2.98901	0.305113	9.79641	1.16662e-22	1.75311e-20	34	18	34	219	204	177	up
Ibat.Brg_v3.03AG002500	21.9618	1.71323	0.578585	2.96107	0.00306573	0.0400165	14	11	8	38	31	26	up
Ibat.Brg_v3.03AG002970	212.058	1.06767	0.191618	5.57188	2.52007e-08	1.20741e-06	144	149	150	285	316	212	up
Ibat.Brg_v3.03AG003120	446.895	1.16414	0.164265	7.08694	1.37108e-12	1.06442e-10	212	370	319	603	560	571	up
Ibat.Brg_v3.03AG003470	36.0585	-1.82049	0.474454	-3.83703	0.000124532	0.00281696	74	54	52	18	16	11	down
Ibat.Brg_v3.03AG003650	27.1328	2.64982	0.555982	4.76601	1.87906e-06	6.56055e-05	8	6	10	39	47	45	up
Ibat.Brg_v3.03AG004750	128.6	1.08414	0.275422	3.93628	8.2754e-05	0.00198739	69	84	114	162	142	183	up
Ibat.Brg_v3.03AG005040	63.3836	2.32487	0.379365	6.12832	8.88102e-10	5.13615e-08	25	21	22	133	97	70	up
Ibat.Brg_v3.03AG009330	31.9088	-2.90006	0.545997	-5.3115	1.08728e-07	4.73818e-06	59	53	69	7	5	9	down
Ibat.Brg_v3.03AG010210	308.298	1.3511	0.171114	7.89593	2.8815e-15	2.88113e-13	161	243	162	440	441	368	up
Ibat.Brg_v3.03AG010280	301.034	1.24518	0.203543	6.11751	9.50461e-10	5.47616e-08	230	164	178	365	406	413	up
Ibat.Brg_v3.03AG010290	414.5	1.14846	0.135427	8.48028	2.24645e-17	2.56942e-15	262	285	287	538	611	463	up
Ibat.Brg_v3.03AG010610	69.0825	2.10698	0.343346	6.13661	8.42994e-10	4.89724e-08	20	37	28	117	97	101	up
Ibat.Brg_v3.03AG010690	75.6811	1.2969	0.318077	4.0773	4.55608e-05	0.00117507	42	54	46	85	102	113	up
Ibat.Brg_v3.03AG010700	876.247	-1.02253	0.104326	-9.80131	1.11134e-22	1.67331e-20	1109	1436	1270	618	524	486	down
Ibat.Brg_v3.03AG010850	5200.26	1.6694	0.0588793	28.353	7.68689e-177	1.13958e-173	2404	2963	2702	7478	7447	7274	up
Ibat.Brg_v3.03AG011590	774.242	1.53536	0.10476	14.656	1.23374e-48	4.15322e-46	400	469	418	1033	1201	1005	up
Ibat.Brg_v3.03AG011870	233.656	1.05585	0.202153	5.22301	1.76039e-07	7.38751e-06	131	157	204	340	295	255	up
Ibat.Brg_v3.03AG012590	1214.2	1.53014	0.0875732	17.4728	2.31067e-68	1.1955e-65	620	749	656	1851	1657	1565	up
Ibat.Brg_v3.03AG013300	70.5431	-5.41024	1.7666	-3.06252	0.00219481	0.0309207	187	3	241	0	5	4	down
Ibat.Brg_v3.03AG016670	8.57202	3.3477	1.11289	3.00811	0.00262874	0.0355339	0	1	4	17	14	13	up
Ibat.Brg_v3.03AG019710	104.249	2.09316	0.274761	7.61813	2.57373e-14	2.38186e-12	41	41	46	176	176	126	up
Ibat.Brg_v3.03AG020560	66.6429	1.61988	0.350988	4.6152	3.92723e-06	0.000129491	24	46	37	80	113	90	up
Ibat.Brg_v3.03AG024480	58.9647	-1.13864	0.34714	-3.28007	0.00103782	0.0170152	90	92	80	32	43	29	down
Ibat.Brg_v3.03AG024500	110.155	1.62172	0.262432	6.17959	6.42689e-10	3.78783e-08	64	54	56	171	165	133	up
Ibat.Brg_v3.03AG025210	48.3761	1.42422	0.464608	3.06542	0.00217362	0.0307064	23	28	34	69	36	89	up
Ibat.Brg_v3.03AG030360	75.2876	1.1552	0.369665	3.125	0.00177807	0.0261288	54	41	55	134	108	55	up
Ibat.Brg_v3.03AG031580	87.8139	1.04905	0.298201	3.51793	0.000434935	0.00818382	54	60	71	105	101	124	up
Ibat.Brg_v3.03AG032600	264.42	5.18986	1.01978	5.08922	3.59544e-07	1.43613e-05	12	4	29	144	976	349	up
Ibat.Brg_v3.03AG033020	21.4036	-3.34707	1.12252	-2.98174	0.00286619	0.0380169	108	7	3	6	4	1	down
Ibat.Brg_v3.03AG033410	32.1336	2.74139	0.692083	3.96107	7.4615e-05	0.00181568	8	7	12	26	115	21	up
Ibat.Brg_v3.03AG034600	44.5917	2.09089	0.702359	2.97696	0.00291124	0.0384623	18	21	16	167	26	16	up
Ibat.Brg_v3.03AG034980	342.056	2.38449	0.196251	12.1502	5.72303e-34	1.37871e-31	81	130	147	559	495	553	up
Ibat.Brg_v3.03AG035010	27.8265	2.42094	0.55552	4.35797	1.31272e-05	0.000385662	11	5	12	46	47	39	up
Ibat.Brg_v3.03AG035700	12.6229	2.43217	0.800831	3.03706	0.002389	0.0329948	2	7	4	17	24	19	up
Ibat.Brg_v3.03AG037660	17.9132	3.73293	1.04628	3.56782	0.00035997	0.00699524	2	0	6	4	53	36	up
Ibat.Brg_v3.03BG001270	471.885	1.06895	0.153202	6.9774	3.00699e-12	2.23108e-10	285	300	400	635	650	518	up
Ibat.Brg_v3.03BG002450	304.235	1.03035	0.153347	6.71913	1.82815e-11	1.2708e-09	201	216	230	402	417	333	up
Ibat.Brg_v3.03BG003590	20.0808	-4.42094	1.11179	-3.97642	6.99594e-05	0.00172141	98	11	8	1	2	2	down
Ibat.Brg_v3.03BG005400	83.7976	-1.35476	0.328817	-4.12011	3.78694e-05	0.000995008	143	112	132	50	56	28	down
Ibat.Brg_v3.03BG005660	39.912	1.63627	0.478214	3.42163	0.00062247	0.0110466	15	20	28	68	36	64	up
Ibat.Brg_v3.03BG007830	11.7883	4.17318	1.07648	3.87669	0.000105888	0.00244968	1	1	2	8	28	26	up
Ibat.Brg_v3.03BG008090	64.3441	1.12328	0.362061	3.10245	0.00191924	0.0277215	27	47	58	85	77	85	up
Ibat.Brg_v3.03BG008260	127.26	1.54609	0.23494	6.58078	4.67971e-11	3.15624e-09	66	72	72	182	177	173	up
Ibat.Brg_v3.03BG008890	68.5512	1.71082	0.340642	5.02234	5.10469e-07	1.98949e-05	27	32	45	111	106	80	up
Ibat.Brg_v3.03BG009330	787.349	-1.13534	0.0977125	-11.6192	3.29332e-31	7.27457e-29	1059	1302	1150	498	480	410	down
Ibat.Brg_v3.03BG009490	59.1539	1.93502	0.404673	4.7817	1.73819e-06	6.12697e-05	19	34	27	92	61	107	up
Ibat.Brg_v3.03BG009700	86.7971	1.82906	0.573597	3.18876	0.00142887	0.0219207	43	41	39	294	37	57	up
Ibat.Brg_v3.03BG011060	11.8956	2.73017	0.930433	2.9343	0.00334297	0.0427591	4	2	4	28	27	5	up
Ibat.Brg_v3.03BG011110	88.7519	1.35132	0.29942	4.51314	6.38734e-06	0.000201062	62	57	42	121	115	121	up
Ibat.Brg_v3.03BG013500	48.5973	-1.97587	0.462984	-4.26768	1.97518e-05	0.000554907	49	130	77	14	19	22	down
Ibat.Brg_v3.03BG013700	31.0313	-3.54074	0.731477	-4.84053	1.29494e-06	4.70881e-05	92	73	18	6	6	2	down
Ibat.Brg_v3.03BG028490	36.426	2.50394	0.635173	3.94214	8.07582e-05	0.00194309	13	10	12	22	42	103	up
Ibat.Brg_v3.03BG029030	46.8264	2.29467	0.525996	4.36252	1.28572e-05	0.000378741	11	23	18	44	134	45	up
Ibat.Brg_v3.03BG030290	87.0854	-1.02928	0.341895	-3.01051	0.00260808	0.0353253	84	130	167	73	47	42	down
Ibat.Brg_v3.03BG030650	206.145	2.61017	0.241972	10.7871	3.96166e-27	7.5038e-25	50	61	77	385	267	339	up
Ibat.Brg_v3.03BG031700	237.965	-1.16227	0.200285	-5.80307	6.51116e-09	3.39152e-07	315	355	394	133	122	155	down
Ibat.Brg_v3.03BG032570	83.3208	1.13938	0.330998	3.44227	0.000576847	0.0104265	72	56	39	123	115	86	up
Ibat.Brg_v3.03CG002420	99.3252	-1.13208	0.300824	-3.76326	0.000167716	0.00364306	136	181	127	78	61	38	down
Ibat.Brg_v3.03CG002470	153.877	1.24218	0.246571	5.03784	4.70813e-07	1.84613e-05	64	120	115	198	230	182	up
Ibat.Brg_v3.03CG003840	20.4219	-2.18027	0.738666	-2.95163	0.00316102	0.0409341	23	62	26	14	3	4	down
Ibat.Brg_v3.03CG005880	31.0708	1.79615	0.520767	3.44905	0.000562555	0.0102001	15	17	13	67	31	38	up
Ibat.Brg_v3.03CG006060	226.288	1.64481	0.186662	8.81169	1.23273e-18	1.52539e-16	93	138	126	337	353	278	up
Ibat.Brg_v3.03CG006160	65.0252	3.78678	1.16579	3.24826	0.00116113	0.0185555	6	15	8	175	175	6	up
Ibat.Brg_v3.03CG006700	82.0933	2.74812	0.402491	6.82779	8.62315e-12	6.18956e-10	34	20	14	128	188	91	up
Ibat.Brg_v3.03CG007320	58.8061	2.37974	0.381884	6.23158	4.61758e-10	2.77451e-08	16	30	16	102	100	77	up
Ibat.Brg_v3.03CG007410	78.4561	-2.0512	0.336166	-6.10175	1.04914e-09	6.02219e-08	147	126	133	24	27	34	down
Ibat.Brg_v3.03CG008060	69.4387	-1.03558	0.329775	-3.14026	0.00168798	0.0250725	108	101	92	53	45	31	down
Ibat.Brg_v3.03CG008840	5797.21	1.48791	0.0450748	33.0098	5.87464e-239	1.33199e-235	2982	3596	3302	8391	8231	7420	up
Ibat.Brg_v3.03CG009120	25.6302	-2.32497	0.561704	-4.13914	3.48603e-05	0.000922865	45	46	47	11	6	7	down
Ibat.Brg_v3.03CG009430	31.7655	-3.17939	0.896474	-3.54656	0.000390302	0.00747923	94	87	3	11	4	3	down
Ibat.Brg_v3.03CG009530	22.2767	2.718	0.921881	2.94832	0.00319507	0.0412646	5	5	9	86	3	21	up
Ibat.Brg_v3.03CG009750	54.1703	1.37059	0.421515	3.25157	0.00114768	0.0183824	24	47	28	47	95	77	up
Ibat.Brg_v3.03CG009970	11.683	2.83375	0.948146	2.98873	0.00280144	0.0373832	7	1	1	24	20	14	up
Ibat.Brg_v3.03CG010500	13.6189	3.75237	1.16626	3.21745	0.00129337	0.0202251	2	0	4	52	20	2	up
Ibat.Brg_v3.03CG011130	7.38625	-4.25406	1.48033	-2.87372	0.00405666	0.0497419	4	28	15	0	0	2	down
Ibat.Brg_v3.03CG012090	49.2115	2.52126	0.603653	4.17668	2.958e-05	0.000795645	19	16	12	26	163	51	up
Ibat.Brg_v3.03CG017180	43.4965	1.49176	0.43023	3.46735	0.000525616	0.00961051	29	17	27	73	58	50	up
Ibat.Brg_v3.03CG018110	44.8637	-1.72068	0.587931	-2.92667	0.00342611	0.0436199	67	22	130	20	23	16	down
Ibat.Brg_v3.03CG020350	625.797	1.24545	0.120493	10.3363	4.82871e-25	8.18121e-23	416	383	398	861	887	732	up
Ibat.Brg_v3.03CG022960	13.1463	2.71863	0.908862	2.99124	0.00277845	0.0371343	4	0	7	27	17	20	up
Ibat.Brg_v3.03CG025430	7.01438	5.36239	1.53642	3.49018	0.000482693	0.00894491	1	0	0	15	8	15	up
Ibat.Brg_v3.03CG025850	23.1348	2.86458	0.682875	4.19488	2.73017e-05	0.00074187	5	4	9	58	20	36	up
Ibat.Brg_v3.03CG027380	14.7771	-3.22448	0.958161	-3.36528	0.000764652	0.0131725	7	58	25	4	1	3	down
Ibat.Brg_v3.03CG028210	288.646	1.43413	0.182583	7.85467	4.00832e-15	3.93132e-13	160	147	196	425	442	324	up
Ibat.Brg_v3.03CG029780	69.8111	1.72447	0.488091	3.5331	0.000410713	0.00781002	27	59	21	135	138	37	up
Ibat.Brg_v3.03CG030180	26.4772	3.08882	0.619057	4.98955	6.05203e-07	2.33159e-05	6	6	6	64	28	41	up
Ibat.Brg_v3.03CG030220	85.8723	1.41407	0.291599	4.84936	1.23859e-06	4.51243e-05	44	54	54	141	109	102	up
Ibat.Brg_v3.03CG030410	12.0726	6.16391	1.41386	4.35964	1.30277e-05	0.000383177	0	0	1	13	32	22	up
Ibat.Brg_v3.03CG031420	121.143	-2.40072	0.469538	-5.11294	3.17181e-07	1.27817e-05	59	405	220	45	34	30	down
Ibat.Brg_v3.03CG031570	74.3152	1.28815	0.365554	3.52383	0.000425357	0.00805275	53	61	26	112	112	75	up
Ibat.Brg_v3.03DG001400	54.6923	1.09099	0.375817	2.90298	0.00369629	0.0462651	38	38	37	71	94	47	up
Ibat.Brg_v3.03DG001470	175.455	1.32521	0.235944	5.61662	1.94726e-08	9.46495e-07	78	104	143	239	251	216	up
Ibat.Brg_v3.03DG001980	111.893	1.18551	0.287619	4.12181	3.75914e-05	0.000989726	85	57	77	173	155	112	up
Ibat.Brg_v3.03DG002550	9.91771	3.87542	1.21225	3.19687	0.00138926	0.021441	2	0	2	16	4	30	up
Ibat.Brg_v3.03DG002890	82.8557	-4.33982	1.15563	-3.75536	0.000173092	0.00374297	11	218	297	11	5	6	down
Ibat.Brg_v3.03DG004720	31.4011	1.88548	0.506543	3.72224	0.00019746	0.00420502	8	22	14	43	51	45	up
Ibat.Brg_v3.03DG006350	31.8315	1.43008	0.494625	2.89125	0.00383713	0.0476106	15	22	19	48	30	51	up
Ibat.Brg_v3.03DG006430	214.057	-1.28865	0.210278	-6.12832	8.88115e-10	5.13615e-08	281	386	321	142	94	113	down
Ibat.Brg_v3.03DG007030	96.073	1.20201	0.285976	4.20317	2.63205e-05	0.00071851	73	57	57	144	122	111	up
Ibat.Brg_v3.03DG007210	22.2802	-5.86205	1.99925	-2.93212	0.00336654	0.0429751	59	2	76	0	0	2	down
Ibat.Brg_v3.03DG007690	15.9271	4.59918	1.3345	3.44638	0.000568147	0.0102886	2	0	2	2	84	4	up
Ibat.Brg_v3.03DG012160	5.35646	-5.77369	1.93806	-2.97911	0.00289088	0.0382326	2	34	1	0	0	0	down
Ibat.Brg_v3.03DG016300	51.3592	1.35866	0.46439	2.92569	0.00343697	0.0437149	46	30	16	56	96	57	up
Ibat.Brg_v3.03DG017700	9.97284	3.91756	1.17383	3.33741	0.000845627	0.0143747	0	0	4	20	12	20	up
Ibat.Brg_v3.03DG018780	55.4455	1.06726	0.354527	3.01038	0.00260918	0.0353253	38	41	37	79	82	52	up
Ibat.Brg_v3.03DG019120	63.605	5.22978	1.56339	3.34515	0.000822394	0.0140231	0	5	6	62	293	10	up
Ibat.Brg_v3.03DG020300	108.991	1.21353	0.269617	4.50094	6.76522e-06	0.000212091	75	75	62	165	123	139	up
Ibat.Brg_v3.03DG021940	148.839	1.12881	0.274163	4.11729	3.83351e-05	0.00100656	102	137	65	228	197	153	up
Ibat.Brg_v3.03DG022970	190.121	-1.15102	0.205676	-5.59629	2.18991e-08	1.05645e-06	244	305	302	136	103	94	down
Ibat.Brg_v3.03DG023540	488.877	1.13201	0.14048	8.05819	7.7432e-16	8.13247e-14	348	347	294	706	604	578	up
Ibat.Brg_v3.03DG023720	106.537	1.5271	0.517508	2.95087	0.00316883	0.0410012	57	58	62	75	56	291	up
Ibat.Brg_v3.03DG024960	18.8281	2.55041	0.881255	2.89407	0.00380283	0.0472519	5	9	4	73	12	8	up
Ibat.Brg_v3.03DG025500	39.8113	5.65448	0.774638	7.29951	2.88821e-13	2.41751e-11	3	2	0	60	79	79	up
Ibat.Brg_v3.03DG025580	89.4068	1.22577	0.345267	3.55021	0.000384924	0.00739073	67	66	40	158	125	74	up
Ibat.Brg_v3.03DG025970	20.3367	3.96902	0.829205	4.78654	1.69682e-06	5.9921e-05	0	3	5	50	21	36	up
Ibat.Brg_v3.03EG001980	43.6007	-1.53538	0.415541	-3.6949	0.000219977	0.0046182	54	91	67	25	19	19	down
Ibat.Brg_v3.03EG002800	62.0552	-1.04174	0.342295	-3.0434	0.00233924	0.0325333	87	107	77	45	33	36	down
Ibat.Brg_v3.03EG003150	22.9888	3.13701	0.94426	3.32219	0.000893125	0.0150264	5	3	7	10	8	90	up
Ibat.Brg_v3.03EG003170	54.8238	-1.92581	0.629093	-3.06125	0.00220412	0.0310179	55	212	25	33	18	14	down
Ibat.Brg_v3.03EG003360	20.203	1.98877	0.684355	2.90606	0.00366017	0.0458801	2	14	11	35	36	21	up
Ibat.Brg_v3.03EG003470	39.8778	2.26113	0.738426	3.0621	0.00219794	0.0309556	19	14	11	20	19	135	up
Ibat.Brg_v3.03EG003870	25.3355	1.61922	0.526406	3.07599	0.00209803	0.0298573	15	12	13	38	33	36	up
Ibat.Brg_v3.03EG003940	56.929	1.09705	0.375304	2.92308	0.00346583	0.0439949	30	59	30	76	79	64	up
Ibat.Brg_v3.03EG014090	22.4442	2.54481	0.713499	3.56666	0.000361562	0.0070191	2	16	4	49	34	26	up
Ibat.Brg_v3.03EG014470	57.7693	-1.59221	0.382218	-4.16571	3.10387e-05	0.000830825	87	105	89	29	18	33	down
Ibat.Brg_v3.03EG014690	276.702	2.02008	0.661707	3.05283	0.00226696	0.0317053	112	107	134	815	315	150	up
Ibat.Brg_v3.03EG015290	9.51113	3.25532	1.03226	3.15358	0.00161279	0.0241934	0	4	2	18	19	12	up
Ibat.Brg_v3.03EG017210	68.5106	1.49464	0.364881	4.09624	4.19906e-05	0.00109249	28	61	29	109	98	79	up
Ibat.Brg_v3.03EG017640	111.531	-1.52714	0.335538	-4.55133	5.33068e-06	0.000170586	225	166	139	78	40	44	down
Ibat.Brg_v3.03EG018580	8.40597	-3.47266	1.1796	-2.94393	0.00324078	0.0416803	11	12	27	1	3	0	down
Ibat.Brg_v3.03EG021420	15.5854	2.88888	0.846906	3.4111	0.000647022	0.0114113	4	5	3	29	8	38	up
Ibat.Brg_v3.03EG022590	58.5791	8.45778	1.22886	6.88263	5.87585e-12	4.25723e-10	1	0	0	100	136	94	up
Ibat.Brg_v3.03EG023000	31.4072	3.44267	0.593366	5.80193	6.55547e-09	3.40776e-07	7	4	6	41	79	43	up
Ibat.Brg_v3.03EG023960	42.7382	-1.94663	0.632	-3.08011	0.00206926	0.0295132	42	144	41	14	32	5	down
Ibat.Brg_v3.03FG001170	67.8972	-1.12	0.353181	-3.17117	0.00151828	0.0230492	95	97	108	28	42	49	down
Ibat.Brg_v3.03FG002570	39.4084	1.64939	0.436767	3.77636	0.000159136	0.00348318	16	24	22	70	46	52	up
Ibat.Brg_v3.03FG002940	49.3512	-1.1939	0.379106	-3.14925	0.00163692	0.0244223	62	82	79	30	24	30	down
Ibat.Brg_v3.03FG003370	27.2842	-1.91787	0.526351	-3.64371	0.000268739	0.00548072	43	54	43	13	8	11	down
Ibat.Brg_v3.03FG003540	214.881	2.15844	0.189731	11.3763	5.48836e-30	1.14351e-27	77	93	85	366	329	294	up
Ibat.Brg_v3.03FG003710	45.5823	-1.44062	0.397954	-3.62007	0.000294527	0.00592512	73	73	69	19	28	22	down
Ibat.Brg_v3.03FG004180	52.2153	1.60929	0.48201	3.3387	0.000841708	0.0143113	25	19	39	66	122	38	up
Ibat.Brg_v3.03FG004960	23.1703	-2.54007	0.610832	-4.15838	3.20513e-05	0.000856739	45	38	44	8	4	7	down
Ibat.Brg_v3.03FG005290	66.4436	1.79033	0.349649	5.12036	3.04949e-07	1.2321e-05	26	38	33	126	84	81	up
Ibat.Brg_v3.03FG005300	342.161	1.51362	0.151676	9.97931	1.87759e-23	2.94194e-21	187	182	204	502	483	440	up
Ibat.Brg_v3.03FG005440	36.3534	1.90384	0.480517	3.96207	7.43022e-05	0.00180978	10	19	21	42	57	61	up
Ibat.Brg_v3.03FG007000	22.4856	3.08268	0.716013	4.30534	1.66727e-05	0.000479054	10	3	2	27	43	42	up
Ibat.Brg_v3.03FG007140	303.854	1.612	0.154506	10.4333	1.74783e-25	3.05533e-23	158	176	151	454	453	383	up
Ibat.Brg_v3.03FG007800	322.505	-2.11554	0.177624	-11.9102	1.04706e-32	2.40949e-30	486	655	563	138	96	106	down
Ibat.Brg_v3.03FG007870	124.912	1.00019	0.271362	3.68581	0.000227975	0.00476792	59	103	110	168	181	123	up
Ibat.Brg_v3.03FG008510	18.7024	-2.35186	0.662096	-3.55214	0.000382111	0.00734528	32	35	34	4	5	8	down
Ibat.Brg_v3.03FG008990	30.5786	1.52277	0.492823	3.08989	0.00200232	0.0287018	19	18	14	43	56	30	up
Ibat.Brg_v3.03FG009750	20.8482	2.31429	0.732988	3.15733	0.00159219	0.0239615	2	9	12	52	34	14	up
Ibat.Brg_v3.03FG010150	39.5186	1.65219	0.562445	2.93752	0.00330847	0.0423952	17	21	24	76	82	16	up
Ibat.Brg_v3.03FG010430	114.494	-1.48907	0.282843	-5.26464	1.40463e-07	6.01239e-06	145	204	200	64	42	62	down
Ibat.Brg_v3.03FG010700	67.7361	2.16146	0.358541	6.02848	1.6551e-09	9.33368e-08	21	40	20	102	115	95	up
Ibat.Brg_v3.03FG010710	4771.04	1.39422	0.0509705	27.3535	9.81735e-165	1.30486e-161	2690	3044	2782	6713	7096	5683	up
Ibat.Brg_v3.03FG011220	44.089	1.90551	0.586309	3.25001	0.00115399	0.0184682	16	30	15	111	74	17	up
Ibat.Brg_v3.03FG011460	523.977	1.66512	0.162482	10.248	1.20815e-24	1.99863e-22	217	302	298	942	665	640	up
Ibat.Brg_v3.03FG011590	357.364	-1.22957	0.15445	-7.96099	1.70666e-15	1.73571e-13	510	560	552	221	231	153	down
Ibat.Brg_v3.03FG011600	76.4498	1.51639	0.353218	4.29308	1.7621e-05	0.000501995	44	28	55	116	124	81	up
Ibat.Brg_v3.03FG012000	21.466	2.16165	0.662077	3.26495	0.00109483	0.0177089	14	8	3	30	41	28	up
Ibat.Brg_v3.03FG013480	37.5803	-1.47277	0.448231	-3.28574	0.00101713	0.0167223	54	63	62	13	25	18	down
Ibat.Brg_v3.03FG014070	133.186	-1.12295	0.31176	-3.60196	0.000315826	0.00628148	162	205	226	60	127	52	down
Ibat.Brg_v3.03FG015300	12.201	5.24132	1.28522	4.07815	4.53958e-05	0.0011716	2	0	0	21	34	13	up
Ibat.Brg_v3.03FG018990	105.147	1.83305	0.419238	4.37235	1.22916e-05	0.000363608	39	54	57	271	141	61	up
Ibat.Brg_v3.03FG022040	258.307	1.12593	0.179643	6.26758	3.6671e-10	2.23123e-08	165	182	178	351	297	343	up
Ibat.Brg_v3.03FG022930	24.3273	-1.81949	0.589524	-3.08638	0.00202612	0.0289837	26	63	36	8	10	12	down
Ibat.Brg_v3.03FG024610	16.8085	3.6257	0.840242	4.31507	1.59553e-05	0.000460154	4	0	4	37	29	22	up
Ibat.Brg_v3.03FG024960	27.936	-1.75759	0.56521	-3.10962	0.00187329	0.0272116	58	56	25	11	15	10	down
Ibat.Brg_v3.03FG026030	83.0962	1.45359	0.310872	4.67586	2.92723e-06	9.86278e-05	40	45	59	137	121	87	up
Ibat.Brg_v3.03FG026060	51.5057	1.52563	0.410021	3.72087	0.000198537	0.00422214	16	36	35	87	61	67	up
Ibat.Brg_v3.03FG027690	41.0015	-1.44595	0.486418	-2.97264	0.00295252	0.0388877	84	49	58	31	14	17	down
Ibat.Brg_v3.03FG028540	16.5262	-3.65148	0.902319	-4.04677	5.19291e-05	0.00132338	27	54	20	5	2	0	down
Ibat.Brg_v3.03FG029670	7.69907	5.50657	1.60948	3.42133	0.000623148	0.011056	1	0	0	23	19	2	up
Ibat.Brg_v3.03FG031170	215.689	1.03214	0.187757	5.49722	3.85832e-08	1.79612e-06	162	155	140	299	269	247	up
Ibat.Brg_v3.03FG031730	365.101	2.69813	0.181545	14.8621	5.81125e-50	2.055e-47	117	119	79	620	571	583	up
Ibat.Brg_v3.03FG032320	160.856	1.60223	0.228018	7.02675	2.11405e-12	1.60248e-10	67	93	99	258	208	214	up
Ibat.Brg_v3.03FG032370	5.71944	5.07134	1.61398	3.14213	0.00167723	0.0249465	0	1	0	8	18	6	up
Ibat.Brg_v3.03FG032530	34.8634	5.19441	0.749743	6.92825	4.26067e-12	3.13113e-10	2	2	2	89	46	56	up
Ibat.Brg_v3.03FG033550	72.1259	1.90598	0.527206	3.61524	0.000300066	0.00602241	32	48	19	87	41	180	up
Ibat.Brg_v3.03FG033860	750.007	1.18646	0.110271	10.7595	5.34791e-27	9.98233e-25	472	503	506	1116	989	835	up
Ibat.Brg_v3.03FG033930	462.859	1.04044	0.14073	7.39318	1.43355e-13	1.24032e-11	296	335	350	671	630	462	up
Ibat.Brg_v3.03FG033990	134.347	1.67229	0.276079	6.05728	1.38442e-09	7.87058e-08	74	54	78	239	163	173	up
Ibat.Brg_v3.03FG034250	14.3871	5.48896	1.23435	4.44683	8.71457e-06	0.00026659	2	0	0	32	30	18	up
Ibat.Brg_v3.03FG034470	331.243	1.13532	0.149035	7.61782	2.57999e-14	2.38479e-12	214	255	203	451	461	372	up
Ibat.Brg_v3.04AG001730	22.6318	-3.26264	0.809366	-4.03111	5.55151e-05	0.00140133	20	96	22	6	2	4	down
Ibat.Brg_v3.04AG002410	52.7992	1.6231	0.387599	4.18757	2.81952e-05	0.000763277	30	20	33	71	83	70	up
Ibat.Brg_v3.04AG002940	20.3921	6.04022	1.20172	5.0263	5.00045e-07	1.9538e-05	0	2	0	48	23	41	up
Ibat.Brg_v3.04AG004720	608.197	1.16133	0.107814	10.7716	4.68577e-27	8.81039e-25	386	437	394	807	847	713	up
Ibat.Brg_v3.04AG005270	145.923	2.46921	0.240311	10.275	9.13194e-25	1.52377e-22	39	55	51	222	238	233	up
Ibat.Brg_v3.04AG005650	22.4065	-4.09016	1.00702	-4.06163	4.87308e-05	0.00124889	64	3	65	2	3	2	down
Ibat.Brg_v3.04AG006250	57.1134	3.51536	0.598478	5.87383	4.25835e-09	2.2671e-07	6	11	13	113	169	24	up
Ibat.Brg_v3.04AG006360	176.172	4.25088	0.287701	14.7754	2.11252e-49	7.33578e-47	15	20	22	344	267	325	up
Ibat.Brg_v3.04AG006370	67.0482	3.57748	0.453891	7.88181	3.22662e-15	3.19718e-13	18	7	8	125	89	130	up
Ibat.Brg_v3.04AG006380	422.173	1.1294	0.146595	7.70419	1.31675e-14	1.23941e-12	227	345	291	595	530	505	up
Ibat.Brg_v3.04AG006660	46.0967	-1.29454	0.422853	-3.06145	0.00220269	0.0310087	68	67	76	25	17	32	down
Ibat.Brg_v3.04AG007550	34.801	4.95752	0.735693	6.73857	1.5995e-11	1.1169e-09	1	0	6	77	58	55	up
Ibat.Brg_v3.04AG007560	574.06	4.35525	0.192182	22.6621	1.05992e-113	9.07879e-111	63	67	43	1048	890	1115	up
Ibat.Brg_v3.04AG007570	22.0587	5.11745	0.904866	5.65548	1.55409e-08	7.65526e-07	2	2	0	39	47	35	up
Ibat.Brg_v3.04AG007580	34.0115	4.93747	0.762723	6.47347	9.57755e-11	6.24647e-09	0	2	5	76	36	71	up
Ibat.Brg_v3.04AG007660	17.7637	2.60696	0.710677	3.66827	0.000244196	0.00505507	6	2	8	27	34	25	up
Ibat.Brg_v3.04AG007750	51.3614	1.43915	0.403934	3.56283	0.000366876	0.00710973	31	40	19	83	78	52	up
Ibat.Brg_v3.04AG007940	1685.1	-1.10494	0.0703172	-15.7136	1.2208e-55	4.9273e-53	2324	2576	2545	1053	1057	902	down
Ibat.Brg_v3.04AG009960	19.9978	6.90279	1.37544	5.0186	5.20485e-07	2.02545e-05	0	0	1	31	70	14	up
Ibat.Brg_v3.04AG013410	75.8399	2.03601	0.357798	5.69039	1.26747e-08	6.33652e-07	41	22	32	113	141	91	up
Ibat.Brg_v3.04AG014610	38.601	-1.77418	0.582316	-3.04677	0.00231314	0.0322635	23	88	87	26	16	8	down
Ibat.Brg_v3.04AG019460	841.918	1.58974	0.103199	15.4045	1.52683e-53	5.8269e-51	405	495	462	1339	1186	1038	up
Ibat.Brg_v3.04AG021960	41.5669	2.49456	0.538077	4.63607	3.55104e-06	0.000117894	22	14	4	77	58	63	up
Ibat.Brg_v3.04AG022640	213.512	-1.09996	0.196801	-5.58917	2.28152e-08	1.09721e-06	326	337	278	130	151	103	down
Ibat.Brg_v3.04AG022970	33.6542	-1.39228	0.472387	-2.94733	0.00320535	0.0413488	39	63	57	13	20	19	down
Ibat.Brg_v3.04AG023780	7.14697	6.39065	1.58833	4.02351	5.73379e-05	0.00144262	0	0	0	8	25	8	up
Ibat.Brg_v3.04AG024180	297.468	1.49455	0.164268	9.09823	9.1819e-20	1.21204e-17	167	182	155	390	430	411	up
Ibat.Brg_v3.04AG024940	11.7847	-3.34899	1.0946	-3.05956	0.00221664	0.0311655	3	24	44	3	2	1	down
Ibat.Brg_v3.04AG025200	26.5644	1.97162	0.538898	3.6586	0.000253593	0.00522434	9	12	14	31	42	45	up
Ibat.Brg_v3.04AG025840	58.8886	2.21984	0.382203	5.80801	6.32183e-09	3.30183e-07	21	16	30	99	93	81	up
Ibat.Brg_v3.04AG027440	34.4862	-2.01196	0.597293	-3.36847	0.000755862	0.0130503	22	108	55	12	18	9	down
Ibat.Brg_v3.04AG031560	196.447	-1.02926	0.195539	-5.2637	1.41188e-07	6.04005e-06	287	308	258	131	135	99	down
Ibat.Brg_v3.04AG032750	106.398	1.06987	0.334077	3.20246	0.00136257	0.0210883	77	79	66	104	215	92	up
Ibat.Brg_v3.04AG034430	777.832	1.3169	0.108268	12.1633	4.87519e-34	1.17814e-31	428	563	457	1147	1108	880	up
Ibat.Brg_v3.04AG034550	71.5482	1.6202	0.39504	4.10136	4.10721e-05	0.00107076	17	58	41	90	103	109	up
Ibat.Brg_v3.04AG034630	61.6499	9.49604	1.22694	7.73962	9.97181e-15	9.49492e-13	0	0	0	125	102	118	up
Ibat.Brg_v3.04AG034900	182.369	1.35099	0.307258	4.39694	1.0979e-05	0.000329198	82	83	167	334	243	168	up
Ibat.Brg_v3.04BG001810	141.972	1.11377	0.242083	4.6008	4.20875e-06	0.000137597	83	85	122	190	194	163	up
Ibat.Brg_v3.04BG002490	30.4061	2.50601	0.815894	3.0715	0.0021299	0.0302104	11	6	12	14	14	108	up
Ibat.Brg_v3.04BG003050	67.9752	-3.3649	1.09851	-3.06315	0.00219022	0.0308786	263	113	12	14	11	9	down
Ibat.Brg_v3.04BG003590	33.5777	2.8459	0.853554	3.33418	0.000855517	0.0145108	9	2	15	42	7	108	up
Ibat.Brg_v3.04BG004340	148.612	-4.22196	1.19443	-3.53471	0.000408216	0.00777245	529	16	326	11	14	17	down
Ibat.Brg_v3.04BG004700	10.1979	-6.69814	1.58788	-4.2183	2.46148e-05	0.000675767	7	8	51	0	0	0	down
Ibat.Brg_v3.04BG004780	21.4883	4.06372	1.08848	3.73341	0.000188908	0.00403965	1	4	3	4	107	8	up
Ibat.Brg_v3.04BG005060	19.3992	3.15181	0.737272	4.27495	1.91177e-05	0.000539057	2	9	2	31	42	26	up
Ibat.Brg_v3.04BG006180	17.9983	-3.24777	1.09511	-2.96571	0.00301984	0.0395312	2	77	32	3	7	0	down
Ibat.Brg_v3.04BG006310	89.2431	-3.59143	1.03159	-3.48147	0.000498676	0.00919908	17	289	247	15	8	15	down
Ibat.Brg_v3.04BG006440	56.6011	-2.08457	0.522964	-3.98606	6.71781e-05	0.00166448	99	62	132	7	36	18	down
Ibat.Brg_v3.04BG006990	92.9509	-4.61939	1.26663	-3.64699	0.00026533	0.00542124	172	13	380	10	9	2	down
Ibat.Brg_v3.04BG007110	31.8562	5.73716	1.7314	3.3136	0.000921031	0.0153751	0	4	0	8	72	91	up
Ibat.Brg_v3.04BG007870	147.272	1.17603	0.347431	3.38494	0.000711944	0.0124059	112	108	71	149	130	280	up
Ibat.Brg_v3.04BG008210	29.3951	3.44459	0.575443	5.98597	2.15103e-09	1.19814e-07	6	6	4	53	56	43	up
Ibat.Brg_v3.04BG008240	43.8593	-2.74465	0.80535	-3.40802	0.000654368	0.0115224	16	19	212	13	9	10	down
Ibat.Brg_v3.04BG008320	26.6823	-3.99165	0.934969	-4.26929	1.96099e-05	0.000551322	74	6	77	6	2	1	down
Ibat.Brg_v3.04BG008510	60.644	-2.29749	0.504049	-4.55808	5.16231e-06	0.000166095	60	215	62	19	23	16	down
Ibat.Brg_v3.04BG009410	192.198	7.95228	0.961244	8.2729	1.30736e-16	1.42956e-14	2	2	1	552	7	490	up
Ibat.Brg_v3.04BG010580	11.6742	4.61676	1.33558	3.45674	0.000546761	0.00993162	0	1	2	26	39	1	up
Ibat.Brg_v3.04BG011050	49.0979	2.50807	0.760255	3.29899	0.000970336	0.0160798	11	19	18	14	208	22	up
Ibat.Brg_v3.04BG011510	45.7086	-3.08961	0.737515	-4.18922	2.79917e-05	0.000758685	185	17	49	12	7	8	down
Ibat.Brg_v3.04BG012180	24.0396	-4.22836	0.899116	-4.70279	2.56625e-06	8.7614e-05	50	16	79	2	5	0	down
Ibat.Brg_v3.04BG012440	57.8068	-2.10563	0.613713	-3.43097	0.000601417	0.0107422	76	23	200	22	18	21	down
Ibat.Brg_v3.04BG012580	30.9947	3.43449	0.874007	3.92959	8.50905e-05	0.00203462	7	8	2	99	4	55	up
Ibat.Brg_v3.04BG014050	45.1084	3.00077	0.473485	6.33762	2.33341e-10	1.44833e-08	16	8	8	77	69	78	up
Ibat.Brg_v3.04BG014240	175.344	-2.18528	0.219484	-9.95645	2.36352e-23	3.68834e-21	306	329	294	59	55	63	down
Ibat.Brg_v3.04BG022280	90.6463	-1.94036	0.443377	-4.37633	1.20696e-05	0.000357588	197	197	70	56	24	26	down
Ibat.Brg_v3.04BG023640	25.2514	-2.99187	0.886193	-3.37609	0.000735238	0.0127542	4	43	101	4	8	4	down
Ibat.Brg_v3.04BG024800	8.1323	-3.80185	1.29509	-2.93558	0.00332923	0.0426187	6	34	11	1	0	2	down
Ibat.Brg_v3.04BG027180	208.313	-1.2055	0.271929	-4.43316	9.28637e-06	0.000282624	282	220	432	119	147	91	down
Ibat.Brg_v3.04BG027650	121.803	1.47058	0.301437	4.87856	1.06864e-06	3.93605e-05	51	90	70	117	197	186	up
Ibat.Brg_v3.04BG027830	12.8641	-4.13326	1.30752	-3.16114	0.00157152	0.0237034	1	17	62	2	2	0	down
Ibat.Brg_v3.04BG028090	39.0203	3.87674	0.766824	5.05557	4.29102e-07	1.69378e-05	5	4	7	78	10	110	up
Ibat.Brg_v3.04BG028490	34.1679	-2.89597	0.731573	-3.95855	7.54058e-05	0.00183261	75	102	19	6	2	14	down
Ibat.Brg_v3.04BG028910	59.8595	4.74169	1.40791	3.3679	0.000757432	0.0130744	4	5	5	8	311	20	up
Ibat.Brg_v3.04BG029490	36.0508	-1.73814	0.475875	-3.65252	0.000259681	0.00532982	47	58	75	22	13	12	down
Ibat.Brg_v3.04BG030440	326.22	-1.0319	0.159436	-6.47216	9.66115e-11	6.27975e-09	445	567	411	206	211	186	down
Ibat.Brg_v3.04BG030690	55.0006	1.14905	0.363282	3.16296	0.00156175	0.0235792	35	43	33	68	92	55	up
Ibat.Brg_v3.04BG031290	22.2301	-2.98095	0.997036	-2.98981	0.00279147	0.0372855	2	21	106	4	5	5	down
Ibat.Brg_v3.04BG031820	108.469	-5.20454	1.2998	-4.00411	6.22516e-05	0.00155407	11	579	135	4	6	6	down
Ibat.Brg_v3.04BG032050	24.6258	-1.95592	0.597298	-3.27462	0.00105804	0.0172513	39	50	38	4	11	13	down
Ibat.Brg_v3.04BG033000	1395.85	1.21889	0.0879114	13.865	1.03291e-43	3.06257e-41	773	1062	893	1982	1823	1689	up
Ibat.Brg_v3.04CG000250	35.0772	2.43111	0.83477	2.91232	0.00358759	0.0451392	8	16	12	148	9	14	up
Ibat.Brg_v3.04CG000570	104.216	2.53718	0.526537	4.81862	1.44557e-06	5.20013e-05	22	55	24	51	141	289	up
Ibat.Brg_v3.04CG000840	36.3838	2.87362	0.600553	4.78496	1.7102e-06	6.03384e-05	10	5	13	106	45	32	up
Ibat.Brg_v3.04CG002080	7.79996	6.51148	1.5408	4.22605	2.37827e-05	0.000654787	0	0	0	16	8	19	up
Ibat.Brg_v3.04CG002360	86.0831	1.06237	0.343504	3.09276	0.00198306	0.0284894	82	51	45	124	125	81	up
Ibat.Brg_v3.04CG003270	297.383	1.0877	0.184374	5.89945	3.64715e-09	1.95793e-07	222	197	194	464	373	306	up
Ibat.Brg_v3.04CG003550	148.506	1.09638	0.38142	2.87447	0.00404709	0.0496641	82	56	166	272	195	111	up
Ibat.Brg_v3.04CG003830	89.9359	2.50148	0.349414	7.15908	8.12186e-13	6.46145e-11	41	19	26	136	156	137	up
Ibat.Brg_v3.04CG004230	15.7059	-2.29947	0.709248	-3.24213	0.00118641	0.01885	22	31	32	4	7	4	down
Ibat.Brg_v3.04CG005900	22.4601	3.10004	0.998409	3.10498	0.00190294	0.027554	5	2	8	102	11	4	up
Ibat.Brg_v3.04CG005990	153.321	4.72684	0.325543	14.5199	9.06535e-48	3.01228e-45	15	11	10	303	252	273	up
Ibat.Brg_v3.04CG006000	111.325	3.59388	0.306932	11.7091	1.14553e-31	2.55228e-29	18	16	21	188	209	181	up
Ibat.Brg_v3.04CG006010	103.857	1.30047	0.265937	4.89014	1.00766e-06	3.73283e-05	59	80	56	157	134	125	up
Ibat.Brg_v3.04CG006940	42.2582	-1.36373	0.467902	-2.91457	0.00356176	0.0449462	55	64	78	11	29	26	down
Ibat.Brg_v3.04CG007280	156.923	5.31692	0.367385	14.4724	1.81156e-47	5.86778e-45	7	14	4	337	281	246	up
Ibat.Brg_v3.04CG007290	10.8316	5.12265	1.34244	3.81593	0.000135671	0.0030342	0	2	0	11	34	15	up
Ibat.Brg_v3.04CG007300	7.78855	5.5216	1.48803	3.71068	0.000206703	0.00436567	0	0	1	14	16	13	up
Ibat.Brg_v3.04CG007310	1576.27	3.95386	0.118374	33.4015	1.30585e-244	3.05054e-241	201	211	206	3070	2448	2776	up
Ibat.Brg_v3.04CG007320	16.4441	4.33121	0.941455	4.60055	4.21368e-06	0.000137699	1	0	4	31	22	34	up
Ibat.Brg_v3.04CG007330	33.8489	4.9256	0.73473	6.70396	2.02852e-11	1.40628e-09	0	1	6	58	66	60	up
Ibat.Brg_v3.04CG008130	44.5354	2.06278	0.500157	4.12426	3.71925e-05	0.000980228	6	30	21	55	80	67	up
Ibat.Brg_v3.04CG008520	19.3398	2.01594	0.640283	3.14852	0.00164101	0.0244692	7	12	6	24	26	36	up
Ibat.Brg_v3.04CG009520	13.5481	-3.03324	0.927377	-3.27077	0.00107254	0.0174288	21	25	32	2	0	6	down
Ibat.Brg_v3.04CG010660	116.252	3.39864	0.31579	10.7623	5.18329e-27	9.69855e-25	27	24	14	238	199	163	up
Ibat.Brg_v3.04CG010680	24.0117	3.4577	0.848121	4.0769	4.56399e-05	0.00117672	0	1	12	48	32	43	up
Ibat.Brg_v3.04CG010710	443.669	2.96956	0.144576	20.5398	9.50484e-94	6.37155e-91	105	112	108	780	736	695	up
Ibat.Brg_v3.04CG010940	141.257	1.07764	0.23571	4.57191	4.83295e-06	0.000156412	108	89	95	195	172	171	up
Ibat.Brg_v3.04CG011540	73.2999	-1.79655	0.349123	-5.14589	2.66255e-07	1.08947e-05	91	148	133	42	30	21	down
Ibat.Brg_v3.04CG012020	243.376	3.59386	0.208708	17.2196	1.89357e-66	9.41777e-64	32	48	41	437	461	370	up
Ibat.Brg_v3.04CG014680	59.2519	-1.4594	0.38063	-3.83417	0.00012599	0.00284493	89	119	75	38	34	18	down
Ibat.Brg_v3.04CG015540	221.669	1.56549	0.229151	6.83172	8.39024e-12	6.02799e-10	120	93	147	310	380	248	up
Ibat.Brg_v3.04CG015630	11.0402	7.01746	1.43893	4.87686	1.07786e-06	3.96812e-05	0	0	0	17	32	14	up
Ibat.Brg_v3.04CG016240	36.2041	-1.79404	0.523326	-3.42816	0.00060769	0.0108417	75	55	50	9	26	11	down
Ibat.Brg_v3.04CG016950	9.01297	4.19066	1.17886	3.55484	0.000378205	0.00728606	2	1	0	16	17	15	up
Ibat.Brg_v3.04CG021300	49.9555	-1.32112	0.443869	-2.97637	0.00291679	0.0385167	76	80	75	26	44	12	down
Ibat.Brg_v3.04CG022930	131.835	-1.02158	0.31494	-3.24375	0.00117969	0.0187743	102	233	245	70	90	84	down
Ibat.Brg_v3.04CG023880	5.41147	-5.78358	1.63256	-3.54264	0.000396143	0.00757783	12	13	10	0	0	0	down
Ibat.Brg_v3.04CG027400	57.1671	1.37829	0.429085	3.21216	0.00131741	0.0205103	15	53	37	82	67	82	up
Ibat.Brg_v3.04CG027740	107.562	-1.07261	0.266876	-4.01914	5.8411e-05	0.00146579	130	158	185	74	70	52	down
Ibat.Brg_v3.04CG027750	163.821	1.01702	0.207021	4.91265	8.9852e-07	3.35108e-05	103	122	126	202	209	204	up
Ibat.Brg_v3.04CG027830	353.941	1.03352	0.143776	7.18843	6.55414e-13	5.2686e-11	240	280	233	486	474	382	up
Ibat.Brg_v3.04CG028260	66.8544	-1.56725	0.372847	-4.20346	2.62865e-05	0.000718338	76	124	126	35	22	37	down
Ibat.Brg_v3.04CG030090	9.15336	3.18076	1.05367	3.01875	0.00253823	0.0346077	0	3	3	19	10	17	up
Ibat.Brg_v3.04DG001610	70.1495	1.01921	0.321687	3.16834	0.0015331	0.0232231	40	60	51	108	81	76	up
Ibat.Brg_v3.04DG003050	18.9702	3.0773	0.880399	3.49535	0.00047344	0.00881157	4	4	5	6	69	22	up
Ibat.Brg_v3.04DG003360	21.6354	3.67948	0.798351	4.60885	4.0491e-06	0.000132828	3	0	7	48	25	39	up
Ibat.Brg_v3.04DG004300	64.3063	2.23429	0.671449	3.32756	0.000876098	0.0148078	21	38	15	239	51	18	up
Ibat.Brg_v3.04DG005780	146.381	2.38639	0.247892	9.62671	6.16752e-22	8.90364e-20	36	58	59	217	247	226	up
Ibat.Brg_v3.04DG006220	78.8182	1.32368	0.347568	3.8084	0.000139867	0.00311449	33	73	42	104	136	80	up
Ibat.Brg_v3.04DG006930	66.0778	1.20267	0.336671	3.57223	0.000353953	0.00689744	39	53	38	78	83	96	up
Ibat.Brg_v3.04DG007390	20.8616	-2.77949	0.823465	-3.37536	0.000737192	0.0127708	52	59	7	4	7	4	down
Ibat.Brg_v3.04DG007430	169.703	1.13097	0.259523	4.35787	1.31333e-05	0.000385695	107	116	121	149	271	232	up
Ibat.Brg_v3.04DG007570	65.9947	1.12055	0.342996	3.26695	0.00108715	0.0176068	43	54	38	110	73	72	up
Ibat.Brg_v3.04DG007730	20.3224	7.89542	1.33328	5.92181	3.18414e-09	1.73107e-07	0	0	0	53	25	36	up
Ibat.Brg_v3.04DG007740	90.9549	4.3916	0.395496	11.104	1.199e-28	2.38225e-26	4	13	10	168	157	162	up
Ibat.Brg_v3.04DG007750	93.8816	1.4048	0.274641	5.11504	3.13666e-07	1.26533e-05	56	52	58	138	126	119	up
Ibat.Brg_v3.04DG008630	26.5922	4.54249	0.759745	5.97897	2.24559e-09	1.24631e-07	5	2	0	50	47	46	up
Ibat.Brg_v3.04DG008880	83.7423	6.07462	0.595703	10.1974	2.0365e-24	3.32614e-22	0	6	2	178	141	145	up
Ibat.Brg_v3.04DG008890	2522.59	5.35915	0.106258	50.4352	0	0	135	129	124	4979	4401	4443	up
Ibat.Brg_v3.04DG008900	6984.43	4.34511	0.053763	80.8198	0	0	658	759	705	12685	12959	11775	up
Ibat.Brg_v3.04DG008910	1169.79	4.9124	0.150777	32.5805	7.74486e-233	1.65848e-229	87	83	73	2470	1845	2038	up
Ibat.Brg_v3.04DG008920	23.4227	5.61013	1.05917	5.29673	1.17896e-07	5.09735e-06	2	0	1	60	16	51	up
Ibat.Brg_v3.04DG008940	132.768	3.89743	0.393413	9.90672	3.89214e-23	5.98892e-21	24	25	5	300	176	222	up
Ibat.Brg_v3.04DG008950	9.94305	3.91009	1.12116	3.48755	0.000487459	0.00902323	2	2	0	11	14	26	up
Ibat.Brg_v3.04DG009010	1188.24	1.38165	0.082176	16.8133	1.95134e-63	9.17249e-61	661	729	743	1669	1698	1467	up
Ibat.Brg_v3.04DG009790	102.833	-1.09504	0.273187	-4.0084	6.11327e-05	0.00152961	137	168	149	53	60	70	down
Ibat.Brg_v3.04DG009950	266.326	1.38357	0.180743	7.65489	1.93476e-14	1.8057e-12	135	160	183	358	350	370	up
Ibat.Brg_v3.04DG011150	57.2776	-2.65401	0.410926	-6.45861	1.05666e-10	6.828e-09	73	127	123	16	12	16	down
Ibat.Brg_v3.04DG012330	177.864	3.19469	0.23325	13.6964	1.06696e-42	3.15143e-40	28	46	40	310	325	269	up
Ibat.Brg_v3.04DG012410	248.536	3.29364	0.217153	15.1674	5.81541e-52	2.17626e-49	46	55	48	446	367	447	up
Ibat.Brg_v3.04DG013700	667.526	2.33694	0.109921	21.2602	2.65092e-100	1.94628e-97	215	258	242	1096	1080	960	up
Ibat.Brg_v3.04DG015240	82.2519	1.16441	0.353754	3.29159	0.000996235	0.0164172	66	41	55	93	91	131	up
Ibat.Brg_v3.04DG016330	106.391	2.32003	0.275664	8.41617	3.88989e-17	4.39051e-15	36	43	36	165	159	172	up
Ibat.Brg_v3.04DG019550	471.621	1.2443	0.13275	9.37328	7.03121e-21	9.76641e-19	276	357	276	614	642	606	up
Ibat.Brg_v3.04DG020290	26.3735	-8.06875	2.73461	-2.9506	0.00317155	0.0410226	21	1	147	0	0	0	down
Ibat.Brg_v3.04DG023470	24.7496	4.7316	1.03511	4.5711	4.85169e-06	0.000156952	0	5	1	5	74	54	up
Ibat.Brg_v3.04DG025240	103.263	1.25544	0.353435	3.55211	0.000382151	0.00734528	80	68	48	86	197	127	up
Ibat.Brg_v3.04DG026270	190.944	-1.10536	0.350696	-3.1519	0.00162211	0.0242624	414	181	229	104	172	70	down
Ibat.Brg_v3.04DG026290	85.5966	2.81497	0.350332	8.03515	9.34656e-16	9.7237e-14	16	19	34	164	132	126	up
Ibat.Brg_v3.04DG028440	161.027	1.07195	0.207045	5.17738	2.25023e-07	9.30136e-06	103	117	116	202	207	203	up
Ibat.Brg_v3.04DG028560	85.9784	1.1226	0.29717	3.77762	0.000158331	0.00347051	49	70	57	125	93	112	up
Ibat.Brg_v3.04DG028740	38.5164	1.53532	0.425769	3.60601	0.000310944	0.00620038	18	21	25	60	51	50	up
Ibat.Brg_v3.04DG032800	81.1662	1.29003	0.332646	3.87808	0.000105286	0.00243738	65	46	40	106	134	86	up
Ibat.Brg_v3.04DG034100	24.2156	2.17754	0.64636	3.36893	0.000754612	0.0130345	2	14	13	42	30	39	up
Ibat.Brg_v3.04DG035460	146.78	6.88403	0.5615	12.2601	1.48376e-34	3.66613e-32	0	2	6	323	277	223	up
Ibat.Brg_v3.04DG035780	108.078	1.07221	0.321112	3.33904	0.000840678	0.0143001	59	120	50	153	130	129	up
Ibat.Brg_v3.04EG000220	29.9878	-8.25425	2.24653	-3.67423	0.000238571	0.0049586	4	45	148	0	0	0	down
Ibat.Brg_v3.04EG000960	46.7847	1.2717	0.408064	3.11641	0.00183067	0.0267691	27	37	25	63	49	72	up
Ibat.Brg_v3.04EG002560	26.1835	5.8025	0.978411	5.93054	3.01945e-09	1.65202e-07	1	2	0	48	61	37	up
Ibat.Brg_v3.04EG003330	21.3927	-3.34146	1.0252	-3.25931	0.00111683	0.0179817	9	118	7	2	7	2	down
Ibat.Brg_v3.04EG004380	379.652	1.16522	0.14482	8.04601	8.5536e-16	8.9592e-14	245	242	269	481	539	457	up
Ibat.Brg_v3.04EG006830	14.2081	3.03269	0.788879	3.84431	0.000120893	0.00274836	3	3	4	18	29	24	up
Ibat.Brg_v3.04EG007060	61.0164	4.39591	1.28099	3.43165	0.000599916	0.0107326	0	17	2	103	102	120	up
Ibat.Brg_v3.04EG007070	108.927	4.7161	0.378499	12.46	1.23386e-35	3.10843e-33	4	11	11	212	200	179	up
Ibat.Brg_v3.04EG007080	66.9567	1.14076	0.32586	3.50076	0.000463934	0.00865973	44	43	48	100	95	66	up
Ibat.Brg_v3.04EG007800	47.2947	1.17851	0.404477	2.91366	0.0035722	0.0450337	35	24	34	64	76	46	up
Ibat.Brg_v3.04EG008210	491.199	4.83529	0.188797	25.611	1.14993e-144	1.2664e-141	27	44	37	1000	866	806	up
Ibat.Brg_v3.04EG008220	251.99	3.46275	0.212516	16.2941	1.08736e-59	4.8175e-57	44	57	35	472	415	411	up
Ibat.Brg_v3.04EG008230	79.8977	6.99287	0.790817	8.84258	9.35296e-19	1.17239e-16	4	0	0	178	120	146	up
Ibat.Brg_v3.04EG008240	49.1211	4.80601	0.56655	8.48295	2.19564e-17	2.52253e-15	4	5	2	91	102	75	up
Ibat.Brg_v3.04EG008250	204.654	3.85787	0.248037	15.5536	1.50401e-54	5.82636e-52	32	21	32	372	354	348	up
Ibat.Brg_v3.04EG008370	44.7095	1.12917	0.386971	2.91796	0.00352326	0.044577	27	33	31	68	55	50	up
Ibat.Brg_v3.04EG011820	151.499	-1.15338	0.379446	-3.03965	0.00236856	0.0327932	288	96	276	93	73	96	down
Ibat.Brg_v3.04EG014240	40.6817	1.62097	0.463549	3.49687	0.000470746	0.00876989	21	31	13	60	46	65	up
Ibat.Brg_v3.04EG014790	45.8751	-1.63389	0.404654	-4.03776	5.39642e-05	0.00136755	74	88	63	18	26	19	down
Ibat.Brg_v3.04EG015820	17.8571	3.10722	0.790611	3.93015	8.48945e-05	0.00203057	6	6	0	28	34	28	up
Ibat.Brg_v3.04EG016120	11.62	-6.88598	1.58666	-4.33993	1.42531e-05	0.000414475	36	37	2	0	0	0	down
Ibat.Brg_v3.04EG016130	34.2878	-2.35174	0.816154	-2.88149	0.00395796	0.0487879	10	167	20	13	12	7	down
Ibat.Brg_v3.04EG016220	79.0543	1.75671	0.546808	3.21265	0.00131514	0.0204983	13	91	18	86	166	94	up
Ibat.Brg_v3.04EG016870	225.238	3.84522	0.223615	17.1957	2.8604e-66	1.41351e-63	29	36	30	385	426	373	up
Ibat.Brg_v3.04EG018130	86.2226	-1.11889	0.29655	-3.77302	0.000161286	0.00352525	137	136	108	46	60	47	down
Ibat.Brg_v3.04EG018850	28.4431	2.32206	0.719661	3.2266	0.00125268	0.019704	13	2	15	64	58	15	up
Ibat.Brg_v3.04EG024350	32.8761	1.77751	0.46605	3.814	0.000136738	0.00305275	17	17	14	55	51	38	up
Ibat.Brg_v3.04EG025610	168.844	1.40929	0.216252	6.5169	7.17746e-11	4.74537e-09	74	118	109	231	242	217	up
Ibat.Brg_v3.04EG030250	37.8133	2.15384	0.474239	4.54166	5.58123e-06	0.000177792	13	17	15	68	40	64	up
Ibat.Brg_v3.04EG030420	26.3799	1.89297	0.542947	3.48648	0.000489416	0.00904775	11	8	17	41	41	35	up
Ibat.Brg_v3.04EG030800	337.328	1.89302	0.180449	10.4906	9.54247e-26	1.6911e-23	123	154	187	522	458	508	up
Ibat.Brg_v3.04EG031570	41.7318	2.81645	0.510062	5.52177	3.35599e-08	1.5756e-06	6	15	13	47	102	58	up
Ibat.Brg_v3.04EG032070	44.2059	2.546	0.62204	4.09298	4.25857e-05	0.00110536	6	9	27	44	134	39	up
Ibat.Brg_v3.04EG032470	20.415	2.79783	0.744879	3.75608	0.000172593	0.00373354	4	12	1	27	45	29	up
Ibat.Brg_v3.04EG032870	38.9416	1.86646	0.44013	4.24069	2.22834e-05	0.000617481	21	19	14	54	58	59	up
Ibat.Brg_v3.04EG033780	136.76	2.30498	0.257218	8.96118	3.21219e-19	4.08627e-17	37	62	51	226	193	218	up
Ibat.Brg_v3.04EG034070	31.7176	-1.81336	0.608766	-2.97875	0.00289431	0.0382583	59	80	22	9	22	9	down
Ibat.Brg_v3.04EG037780	18.8969	3.0635	0.868743	3.52636	0.000421318	0.00798019	5	5	3	19	9	62	up
Ibat.Brg_v3.04EG037890	9.14128	-3.59552	1.11066	-3.23728	0.00120676	0.0190908	22	14	18	2	2	0	down
Ibat.Brg_v3.04EG038170	52.542	-1.21624	0.399948	-3.041	0.00235796	0.0326698	47	99	95	30	31	28	down
Ibat.Brg_v3.04EG041220	16.8294	6.64974	1.34251	4.95322	7.29941e-07	2.77608e-05	0	1	0	24	41	29	up
Ibat.Brg_v3.04EG041390	29.6775	-3.32425	1.01245	-3.28338	0.00102569	0.0168378	10	4	160	5	4	6	down
Ibat.Brg_v3.04FG003190	1243.86	3.34856	0.103973	32.2059	1.45814e-227	2.9581e-224	232	259	229	2354	2024	1988	up
Ibat.Brg_v3.04FG003730	60.7243	2.35458	0.649436	3.62558	0.000288314	0.00581076	16	28	21	22	228	44	up
Ibat.Brg_v3.04FG003900	17.8465	6.73469	1.35266	4.97885	6.3962e-07	2.45559e-05	0	0	1	52	22	26	up
Ibat.Brg_v3.04FG007760	11.7667	-5.02266	1.42412	-3.52685	0.000420531	0.00797264	8	10	56	2	0	0	down
Ibat.Brg_v3.04FG008400	11.4422	-3.89361	1.10598	-3.52051	0.000430719	0.00812036	36	22	10	2	0	2	down
Ibat.Brg_v3.04FG009840	51.0518	4.30116	0.514376	8.36189	6.17222e-17	6.85614e-15	4	6	6	113	75	85	up
Ibat.Brg_v3.04FG010300	31.3448	2.71448	0.815955	3.32675	0.000878651	0.0148412	9	12	6	44	112	4	up
Ibat.Brg_v3.04FG013570	19.7204	3.4406	1.09389	3.14528	0.00165928	0.0247273	1	6	4	3	8	83	up
Ibat.Brg_v3.04FG013970	10.2583	4.35723	1.38812	3.13894	0.00169563	0.0251619	2	0	1	15	1	36	up
Ibat.Brg_v3.04FG014270	6.82852	6.32592	1.78791	3.53817	0.000402907	0.00769272	0	0	0	2	35	3	up
Ibat.Brg_v3.04FG016790	20.4595	-3.68877	1.17499	-3.1394	0.00169294	0.0251317	103	8	4	3	0	5	down
Ibat.Brg_v3.04FG017450	275.736	-1.27971	0.184706	-6.92835	4.25792e-12	3.13113e-10	375	508	387	128	167	156	down
Ibat.Brg_v3.04FG017910	80.7924	2.24821	0.391964	5.73575	9.70805e-09	4.92364e-07	48	19	22	125	134	116	up
Ibat.Brg_v3.04FG019500	35.497	2.53148	0.496563	5.09799	3.43272e-07	1.37469e-05	7	10	17	59	64	48	up
Ibat.Brg_v3.04FG022390	47.1998	2.97905	0.463466	6.42776	1.29499e-10	8.25051e-09	14	6	14	85	90	62	up
Ibat.Brg_v3.04FG023520	10.4541	6.93726	1.45608	4.76433	1.89485e-06	6.60967e-05	0	0	0	30	13	16	up
Ibat.Brg_v3.04FG024420	71.9262	1.1057	0.34443	3.21023	0.00132629	0.0206147	45	71	33	98	90	88	up
Ibat.Brg_v3.04FG024810	24.4409	-3.51233	1.0091	-3.48067	0.000500168	0.00922218	77	66	1	5	2	4	down
Ibat.Brg_v3.04FG025520	39.7088	-1.42456	0.473326	-3.00969	0.00261515	0.0353885	38	94	59	27	18	16	down
Ibat.Brg_v3.04FG029240	38.0424	1.71358	0.459181	3.73182	0.0001901	0.00406176	16	26	16	41	70	53	up
Ibat.Brg_v3.04FG029490	28.7116	-2.26994	0.629515	-3.60585	0.000311131	0.00620113	25	97	37	8	13	7	down
Ibat.Brg_v3.04FG030050	11.6533	3.79403	1.25371	3.02625	0.00247608	0.0339465	2	1	2	10	1	46	up
Ibat.Brg_v3.04FG030150	155.657	1.86734	0.234933	7.9484	1.88929e-15	1.91891e-13	70	66	80	248	205	231	up
Ibat.Brg_v3.04FG032780	504.999	1.10634	0.122053	9.06445	1.25239e-19	1.63916e-17	323	350	363	648	670	619	up
Ibat.Brg_v3.04FG035150	206.921	-1.74047	0.192933	-9.02109	1.86224e-19	2.39666e-17	292	387	356	86	96	86	down
Ibat.Brg_v3.04FG035540	69.0912	-1.17515	0.352311	-3.33555	0.000851307	0.0144585	83	130	100	44	53	24	down
Ibat.Brg_v3.04FG035830	51.636	1.9253	0.392629	4.90361	9.40902e-07	3.49562e-05	17	24	29	81	93	58	up
Ibat.Brg_v3.04FG037980	40.0294	1.54667	0.437538	3.53495	0.000407854	0.00776909	15	32	20	59	65	45	up
Ibat.Brg_v3.04FG039170	28.5746	2.74398	0.832386	3.29652	0.000978903	0.0161974	9	9	6	7	116	21	up
Ibat.Brg_v3.04FG040220	52.1046	7.38325	1.08569	6.80048	1.04269e-11	7.3812e-10	2	0	0	122	87	83	up
Ibat.Brg_v3.05AG001090	40.7651	1.48512	0.5138	2.89046	0.00384682	0.0477001	32	14	22	42	45	78	up
Ibat.Brg_v3.05AG001360	96.8482	-1.53949	0.276612	-5.56552	2.61366e-08	1.2507e-06	149	149	167	46	46	47	down
Ibat.Brg_v3.05AG001430	145.845	1.18633	0.267086	4.44177	8.9222e-06	0.000272293	108	97	82	249	197	130	up
Ibat.Brg_v3.05AG001740	49.0373	2.81784	0.439589	6.41017	1.45357e-10	9.19996e-09	8	21	11	89	87	67	up
Ibat.Brg_v3.05AG001900	2970.93	5.35084	0.194828	27.4644	4.6731e-166	6.32017e-163	155	121	181	5625	5477	5187	up
Ibat.Brg_v3.05AG001910	39.0987	8.83801	1.26023	7.013	2.33256e-12	1.7475e-10	0	0	0	71	59	87	up
Ibat.Brg_v3.05AG001920	1888.43	5.53592	0.120702	45.8642	0	0	61	110	88	3791	3425	3186	up
Ibat.Brg_v3.05AG004890	204.798	1.53461	0.21254	7.22035	5.18549e-13	4.22568e-11	124	121	94	279	272	300	up
Ibat.Brg_v3.05AG012990	51.4732	1.47145	0.402521	3.65559	0.000256594	0.00527911	22	34	33	90	82	44	up
Ibat.Brg_v3.05AG014120	13.5268	4.41763	1.31963	3.34763	0.000815046	0.0139223	0	2	2	68	3	4	up
Ibat.Brg_v3.05AG014990	384.508	1.06024	0.162861	6.51008	7.51093e-11	4.9531e-09	271	269	265	601	482	387	up
Ibat.Brg_v3.05AG015350	93.6493	1.44591	0.484685	2.98319	0.00285261	0.0378889	89	27	42	79	226	86	up
Ibat.Brg_v3.05AG015860	167.094	2.4154	0.239455	10.0871	6.30036e-24	1.00767e-21	58	50	62	229	304	257	up
Ibat.Brg_v3.05AG015880	54.3264	1.93753	0.425705	4.55135	5.33035e-06	0.000170586	35	24	13	84	90	69	up
Ibat.Brg_v3.05AG017000	95.6597	1.2542	0.289577	4.33115	1.48333e-05	0.000430373	45	67	72	154	123	104	up
Ibat.Brg_v3.05AG017110	18.1416	3.42472	1.02532	3.34015	0.000837333	0.0142494	4	4	2	83	6	7	up
Ibat.Brg_v3.05AG017880	39.2743	1.89325	0.62797	3.01488	0.0025708	0.0349344	13	18	23	36	22	108	up
Ibat.Brg_v3.05AG018740	23.7363	2.20795	0.607091	3.63693	0.000275905	0.00559872	12	7	8	48	24	37	up
Ibat.Brg_v3.05AG018910	118.24	2.14566	0.307965	6.96722	3.2326e-12	2.39157e-10	36	73	34	220	166	158	up
Ibat.Brg_v3.05AG019450	95.0096	1.73231	0.297574	5.82145	5.83404e-09	3.06158e-07	33	51	59	133	135	141	up
Ibat.Brg_v3.05AG019530	28.5302	3.38269	0.630382	5.3661	8.04576e-08	3.57944e-06	8	4	4	51	70	28	up
Ibat.Brg_v3.05AG022260	370.42	2.35561	0.150468	15.6553	3.05877e-55	1.21547e-52	115	149	129	562	635	546	up
Ibat.Brg_v3.05AG022660	1184.35	1.05485	0.0962743	10.9567	6.16831e-28	1.2008e-25	857	835	792	1548	1668	1295	up
Ibat.Brg_v3.05AG022710	62.7692	2.22401	0.395118	5.62871	1.81563e-08	8.86988e-07	24	16	31	79	100	109	up
Ibat.Brg_v3.05AG022810	340.741	-2.02975	0.215379	-9.42406	4.33991e-21	6.09406e-19	646	556	559	137	168	77	down
Ibat.Brg_v3.05AG023050	296.072	-1.08206	0.17726	-6.10436	1.03215e-09	5.93352e-08	405	516	385	154	208	172	down
Ibat.Brg_v3.05AG023190	61.258	1.53769	0.350105	4.39208	1.12269e-05	0.000335329	27	36	39	105	86	67	up
Ibat.Brg_v3.05AG024680	76.5864	-1.20434	0.302704	-3.97862	6.93153e-05	0.00170774	103	131	113	42	53	36	down
Ibat.Brg_v3.05AG024820	22.6421	2.45323	0.702451	3.49239	0.000478727	0.00887994	13	2	7	32	53	24	up
Ibat.Brg_v3.05AG024950	59.86	-1.18126	0.366006	-3.22743	0.00124908	0.0196593	106	77	83	30	41	32	down
Ibat.Brg_v3.05AG025950	26.5145	2.14313	0.585318	3.66147	0.000250772	0.00517037	6	13	13	55	25	41	up
Ibat.Brg_v3.05BG000770	39.7696	4.79426	0.842005	5.69385	1.24203e-08	6.2255e-07	2	3	4	145	70	9	up
Ibat.Brg_v3.05BG000800	14.9005	4.20783	1.37525	3.05968	0.00221577	0.0311589	1	2	2	78	0	4	up
Ibat.Brg_v3.05BG001190	426.878	6.01778	0.257076	23.4086	3.49586e-121	3.24694e-118	13	11	18	838	830	701	up
Ibat.Brg_v3.05BG001200	6.39758	6.23196	1.63448	3.81282	0.000137389	0.00306463	0	0	0	20	13	4	up
Ibat.Brg_v3.05BG001210	2752.5	6.09471	0.128126	47.5682	0	0	60	104	94	5402	4683	5112	up
Ibat.Brg_v3.05BG002860	73.3372	1.67109	0.326158	5.12357	2.99806e-07	1.21387e-05	41	38	34	122	90	101	up
Ibat.Brg_v3.05BG002980	67.4144	-2.06336	0.368452	-5.60009	2.14235e-08	1.03545e-06	142	116	91	27	22	24	down
Ibat.Brg_v3.05BG003940	99.2558	1.89536	0.281782	6.72635	1.73977e-11	1.21265e-09	33	52	52	162	156	124	up
Ibat.Brg_v3.05BG003990	68.1539	-1.12396	0.341043	-3.29564	0.000981977	0.016231	95	99	108	31	55	35	down
Ibat.Brg_v3.05BG005690	280.649	-1.21632	0.161081	-7.55097	4.32029e-14	3.91825e-12	418	448	403	161	176	139	down
Ibat.Brg_v3.05BG011600	42.6828	2.16656	0.729442	2.97016	0.00297648	0.0391031	17	13	20	164	23	15	up
Ibat.Brg_v3.05BG011850	45.8571	-2.36149	0.763173	-3.09431	0.00197273	0.0283679	22	224	17	11	17	14	down
Ibat.Brg_v3.05BG012760	24.8913	4.68894	0.972331	4.82237	1.41861e-06	5.11748e-05	2	2	2	62	5	64	up
Ibat.Brg_v3.05BG013110	48.6777	4.91842	1.39716	3.5203	0.000431058	0.0081241	4	3	3	2	150	110	up
Ibat.Brg_v3.05BG016340	1592.55	1.16319	0.0807593	14.4031	4.94512e-47	1.58182e-44	1032	1179	973	2185	2075	1930	up
Ibat.Brg_v3.05BG016520	5.66726	6.05398	1.61748	3.74285	0.000181942	0.0039135	0	0	0	12	11	9	up
Ibat.Brg_v3.05BG019280	211.547	3.64107	0.225734	16.1299	1.57283e-58	6.77373e-56	26	39	37	364	403	336	up
Ibat.Brg_v3.05BG019290	16.7118	-2.43054	0.773655	-3.14164	0.00168007	0.0249732	16	54	24	6	7	2	down
Ibat.Brg_v3.05BG019340	67.6099	-2.17105	0.57282	-3.79011	0.000150579	0.00332136	26	112	226	19	27	23	down
Ibat.Brg_v3.05BG019890	151.86	-1.33982	0.404247	-3.31436	0.000918523	0.0153405	133	470	125	103	73	67	down
Ibat.Brg_v3.05BG022020	147.918	1.30071	0.231815	5.61099	2.01173e-08	9.77218e-07	83	104	90	218	170	201	up
Ibat.Brg_v3.05BG022530	86.777	3.58888	0.534049	6.72013	1.81563e-11	1.26324e-09	2	20	22	87	130	222	up
Ibat.Brg_v3.05BG022540	44.7479	1.61225	0.408265	3.94902	7.84734e-05	0.00189759	25	22	24	55	63	70	up
Ibat.Brg_v3.05BG023320	79.011	-1.04051	0.334484	-3.11078	0.00186595	0.027143	103	118	123	57	32	55	down
Ibat.Brg_v3.05BG024560	30.0175	1.87606	0.531815	3.52766	0.000419255	0.00796068	19	11	11	35	44	52	up
Ibat.Brg_v3.05BG024580	368.119	1.26797	0.144586	8.76966	1.79211e-18	2.19291e-16	199	255	247	516	477	468	up
Ibat.Brg_v3.05BG024650	221.912	1.30703	0.216711	6.0312	1.62749e-09	9.18471e-08	91	159	167	321	291	277	up
Ibat.Brg_v3.05BG024670	210.526	1.46219	0.214729	6.80945	9.79735e-12	6.95467e-10	90	139	136	287	265	311	up
Ibat.Brg_v3.05BG025520	113.595	2.16958	0.275316	7.88031	3.26573e-15	3.22763e-13	32	59	44	172	202	151	up
Ibat.Brg_v3.05BG026150	42.2589	-2.30341	0.449771	-5.12129	3.03455e-07	1.22735e-05	55	84	90	16	11	13	down
Ibat.Brg_v3.05BG026490	17.9159	4.47876	0.90697	4.93816	7.88645e-07	2.98023e-05	0	1	4	33	30	33	up
Ibat.Brg_v3.05BG026670	57.018	1.12583	0.374976	3.0024	0.00267858	0.0361063	25	43	49	81	86	55	up
Ibat.Brg_v3.05BG026960	77.3682	1.34562	0.317847	4.23355	2.30031e-05	0.000635594	51	48	42	94	134	86	up
Ibat.Brg_v3.05BG026970	336.612	1.03264	0.161268	6.40327	1.52085e-10	9.6179e-09	220	248	248	420	519	341	up
Ibat.Brg_v3.05BG027380	26.318	-6.20808	1.2712	-4.88365	1.04139e-06	3.85038e-05	64	96	10	0	2	0	down
Ibat.Brg_v3.05BG027790	164.089	1.48818	0.207257	7.18038	6.95178e-13	5.57082e-11	79	104	97	234	231	215	up
Ibat.Brg_v3.05BG028020	59.4594	1.2138	0.374426	3.24176	0.00118796	0.018863	36	39	41	111	71	54	up
Ibat.Brg_v3.05BG031530	109.882	-1.60321	0.351679	-4.55873	5.14649e-06	0.000165655	256	158	112	51	55	47	down
Ibat.Brg_v3.05CG001490	64.1516	1.79318	0.411165	4.36122	1.29339e-05	0.000380708	24	42	28	70	149	65	up
Ibat.Brg_v3.05CG004590	69.8117	-1.43631	0.369106	-3.89133	9.96956e-05	0.00233248	96	80	152	38	36	32	down
Ibat.Brg_v3.05CG012930	78.8866	1.24014	0.340915	3.63769	0.00027509	0.00558953	38	46	68	120	83	107	up
Ibat.Brg_v3.05CG013770	54.2834	1.30504	0.448102	2.91236	0.00358705	0.0451392	50	19	30	69	95	55	up
Ibat.Brg_v3.05CG014220	41.0279	1.66952	0.45722	3.65145	0.000260765	0.00534727	20	13	30	68	58	50	up
Ibat.Brg_v3.05CG016250	25.0165	3.41558	0.683105	5.00008	5.73056e-07	2.21216e-05	1	4	9	53	46	31	up
Ibat.Brg_v3.05CG017200	78.7578	1.38001	0.320322	4.30822	1.64576e-05	0.00047305	42	40	59	99	106	113	up
Ibat.Brg_v3.05CG017840	69.2922	-1.77885	0.53236	-3.34144	0.000833447	0.0141959	129	32	178	27	26	34	down
Ibat.Brg_v3.05CG019820	25.9297	2.92424	0.636676	4.59297	4.3698e-06	0.000142319	2	12	6	37	58	35	up
Ibat.Brg_v3.05CG020750	39.3093	3.18731	0.815747	3.90723	9.33593e-05	0.00220566	9	8	8	10	25	151	up
Ibat.Brg_v3.05CG021200	11.3658	3.19305	1.04499	3.05559	0.00224618	0.0315005	5	0	2	29	8	20	up
Ibat.Brg_v3.05CG021570	55.3497	2.04008	0.469744	4.34297	1.40569e-05	0.000410006	24	9	36	89	75	85	up
Ibat.Brg_v3.05CG021970	887.379	1.90996	0.113551	16.8202	1.73606e-63	8.21058e-61	427	419	358	1411	1297	1231	up
Ibat.Brg_v3.05CG022240	496.452	1.01347	0.124636	8.1314	4.24353e-16	4.53093e-14	317	364	384	622	646	597	up
Ibat.Brg_v3.05CG023780	180.138	1.07937	0.218159	4.94762	7.51279e-07	2.85301e-05	90	141	146	244	223	220	up
Ibat.Brg_v3.05DG000930	720.691	5.9558	0.196853	30.255	4.48192e-201	8.03514e-198	22	23	29	1402	1330	1254	up
Ibat.Brg_v3.05DG003200	74.1752	-1.99286	0.594171	-3.35401	0.000796485	0.0136507	35	304	64	21	37	26	down
Ibat.Brg_v3.05DG004080	48.5797	1.55704	0.380517	4.0919	4.2786e-05	0.00111019	24	30	26	65	83	57	up
Ibat.Brg_v3.05DG012480	32.4139	-3.4628	0.861683	-4.01865	5.85334e-05	0.00146838	69	5	113	6	3	6	down
Ibat.Brg_v3.05DG012870	48.1997	1.87198	0.404782	4.62466	3.75204e-06	0.000124213	24	26	17	77	86	52	up
Ibat.Brg_v3.05DG014770	192.129	2.31911	0.210115	11.0374	2.52361e-28	4.98833e-26	74	67	66	314	338	252	up
Ibat.Brg_v3.05DG015790	71.0664	1.4718	0.341545	4.30924	1.63817e-05	0.000471044	36	57	30	101	117	78	up
Ibat.Brg_v3.05DG015940	50.266	1.22296	0.394915	3.09676	0.00195646	0.0281702	24	32	42	79	74	47	up
Ibat.Brg_v3.05DG017200	18.7662	5.3403	1.38626	3.8523	0.000117014	0.00267102	0	2	1	98	8	1	up
Ibat.Brg_v3.05DG018150	42.3873	1.7487	0.413779	4.22618	2.37694e-05	0.000654657	17	21	25	63	58	62	up
Ibat.Brg_v3.05DG018900	6.61599	4.34864	1.44746	3.00433	0.00266163	0.0359218	0	0	2	12	9	14	up
Ibat.Brg_v3.05DG020630	31.8029	-2.09806	0.684965	-3.06302	0.00219118	0.0308864	18	36	114	8	16	10	down
Ibat.Brg_v3.05DG020780	57.8641	1.59383	0.478936	3.32785	0.0008752	0.0147991	22	37	35	35	132	78	up
Ibat.Brg_v3.05DG021130	30.5159	-2.23884	0.759137	-2.9492	0.00318602	0.0411684	22	135	14	9	11	10	down
Ibat.Brg_v3.05DG021560	705.287	1.32394	0.114376	11.5753	5.49561e-31	1.20016e-28	372	455	479	1036	1009	801	up
Ibat.Brg_v3.05DG021810	688.151	1.1501	0.109121	10.5397	5.66979e-26	1.01647e-23	393	502	493	944	962	771	up
Ibat.Brg_v3.05DG022540	1549.45	2.33822	0.0771154	30.3211	6.05225e-202	1.11088e-198	487	612	561	2587	2523	2178	up
Ibat.Brg_v3.05DG022980	675.891	1.25469	0.121582	10.3197	5.74e-25	9.68264e-23	411	518	367	946	925	811	up
Ibat.Brg_v3.05DG023040	35.1237	1.34437	0.448407	2.99809	0.00271678	0.0364872	23	22	19	53	40	48	up
Ibat.Brg_v3.05DG025340	28.1436	2.31203	0.789561	2.92825	0.00340875	0.0434276	12	4	14	11	101	23	up
Ibat.Brg_v3.05EG000170	31.0692	2.36399	0.655933	3.60402	0.000313338	0.00624004	20	10	2	40	44	60	up
Ibat.Brg_v3.05EG000570	86.9735	-1.41954	0.427531	-3.32032	0.000899134	0.0150998	114	97	197	39	76	21	down
Ibat.Brg_v3.05EG000580	16.81	3.35282	0.969691	3.45762	0.000544976	0.00990621	1	7	2	66	10	12	up
Ibat.Brg_v3.05EG000900	34.6631	2.57335	0.614722	4.18619	2.8367e-05	0.000767035	12	7	13	64	90	18	up
Ibat.Brg_v3.05EG001110	4047.35	6.36966	0.11907	53.495	0	0	94	97	122	8630	6815	7025	up
Ibat.Brg_v3.05EG001120	26.2494	5.37408	0.907937	5.919	3.2391e-09	1.75847e-07	0	0	4	57	42	45	up
Ibat.Brg_v3.05EG001130	2297.89	5.82474	0.129862	44.8535	0	0	70	78	110	4774	3945	3970	up
Ibat.Brg_v3.05EG001540	96.6879	1.13269	0.297938	3.80178	0.000143661	0.003187	46	83	69	154	108	112	up
Ibat.Brg_v3.05EG009990	75.2775	1.57601	0.348976	4.5161	6.29894e-06	0.000198685	26	41	56	106	96	113	up
Ibat.Brg_v3.05EG012010	64.5499	-5.14202	0.583956	-8.80549	1.30277e-18	1.60947e-16	171	104	125	3	4	3	down
Ibat.Brg_v3.05EG012190	263.473	1.66633	0.211941	7.86223	3.77354e-15	3.71522e-13	115	135	159	478	309	340	up
Ibat.Brg_v3.05EG012230	41.8496	3.22603	0.478306	6.74468	1.53361e-11	1.07283e-09	11	8	7	65	77	70	up
Ibat.Brg_v3.05EG012420	142.476	1.10996	0.304571	3.64434	0.000268081	0.00547019	67	75	150	179	208	162	up
Ibat.Brg_v3.05EG014470	57.6659	2.21063	0.396412	5.57659	2.45276e-08	1.17735e-06	19	16	31	83	88	94	up
Ibat.Brg_v3.05EG017190	21.2198	2.94131	0.846177	3.476	0.000508953	0.00935284	0	4	12	34	19	50	up
Ibat.Brg_v3.05EG017400	639.884	1.8754	0.160443	11.6889	1.45306e-31	3.22813e-29	221	343	329	1060	797	958	up
Ibat.Brg_v3.05EG018750	14.4456	-3.1536	1.02149	-3.08725	0.00202018	0.0289041	5	62	21	2	1	5	down
Ibat.Brg_v3.05EG019660	12.7219	3.61139	1.19899	3.01202	0.00259517	0.0352035	4	0	2	3	11	48	up
Ibat.Brg_v3.05EG020530	151.256	1.47474	0.289961	5.08599	3.65708e-07	1.45999e-05	48	131	85	241	199	187	up
Ibat.Brg_v3.05EG020780	66.0621	-1.64078	0.366563	-4.47611	7.60145e-06	0.000235245	108	102	112	22	28	39	down
Ibat.Brg_v3.05EG021170	47.2431	1.57382	0.419412	3.75245	0.000175118	0.00378253	29	18	29	66	58	73	up
Ibat.Brg_v3.05EG021530	10.3967	-4.2394	1.25265	-3.38433	0.000713512	0.0124276	22	38	5	1	2	0	down
Ibat.Brg_v3.05EG021610	1149.03	1.98143	0.0947161	20.9197	3.54248e-97	2.52861e-94	429	553	525	1764	1706	1676	up
Ibat.Brg_v3.05FG001140	8158	5.65367	0.13892	40.6972	0	0	361	307	355	16024	14543	14351	up
Ibat.Brg_v3.05FG001150	6.24263	6.1924	1.59471	3.88308	0.000103141	0.00239709	0	0	0	8	15	12	up
Ibat.Brg_v3.05FG001160	2487.18	5.89854	0.340177	17.3396	2.36241e-67	1.20608e-64	52	83	132	5085	4582	4111	up
Ibat.Brg_v3.05FG002780	31.9096	-1.98682	0.681468	-2.9155	0.00355121	0.0448277	50	40	74	28	6	3	down
Ibat.Brg_v3.05FG004580	16.0906	-2.13712	0.705102	-3.03093	0.002438	0.0335377	25	28	32	5	9	3	down
Ibat.Brg_v3.05FG005360	22.8634	2.61054	0.783621	3.33138	0.000864162	0.0146446	1	4	16	45	50	18	up
Ibat.Brg_v3.05FG005380	35.1129	-2.68673	0.830632	-3.23455	0.00121833	0.0192421	14	19	164	7	15	5	down
Ibat.Brg_v3.05FG013720	737.733	1.1436	0.119212	9.59297	8.55845e-22	1.23092e-19	521	519	444	1026	927	900	up
Ibat.Brg_v3.05FG013790	148.357	1.02494	0.24043	4.26296	2.01735e-05	0.000565518	110	85	119	191	186	181	up
Ibat.Brg_v3.05FG014130	172.894	-1.09212	0.226251	-4.82702	1.38591e-06	5.01146e-05	251	261	249	97	138	78	down
Ibat.Brg_v3.05FG016970	17.1312	3.17571	0.748551	4.24247	2.2107e-05	0.000613032	4	3	4	20	41	26	up
Ibat.Brg_v3.05FG018180	10.883	-4.31503	1.32437	-3.25819	0.00112127	0.0180381	4	57	10	1	2	0	down
Ibat.Brg_v3.05FG019770	26.3112	3.17095	0.846024	3.74806	0.00017821	0.00384178	6	6	5	104	7	24	up
Ibat.Brg_v3.05FG019890	133.702	5.63141	0.470005	11.9816	4.4367e-33	1.0302e-30	7	3	7	219	177	326	up
Ibat.Brg_v3.05FG019900	93.7995	1.86233	0.328871	5.66279	1.4893e-08	7.35021e-07	26	47	59	167	121	126	up
Ibat.Brg_v3.05FG021630	138.616	1.02638	0.24914	4.1197	3.79358e-05	0.000996414	107	92	95	213	184	130	up
Ibat.Brg_v3.06AG001890	33.1251	-2.21537	0.575429	-3.84995	0.000118142	0.00269216	23	90	68	11	11	11	down
Ibat.Brg_v3.06AG002140	8.40124	4.66005	1.59914	2.91409	0.00356722	0.044993	2	0	0	37	1	8	up
Ibat.Brg_v3.06AG002330	27.095	-3.97402	1.00368	-3.95943	7.51292e-05	0.00182646	58	108	2	4	1	4	down
Ibat.Brg_v3.06AG002980	164.565	4.65412	1.25412	3.71105	0.0002064	0.00436167	13	19	9	12	301	540	up
Ibat.Brg_v3.06AG003040	31.1894	-2.15773	0.69308	-3.11325	0.00185038	0.0269906	88	40	33	7	23	3	down
Ibat.Brg_v3.06AG003840	30.7552	4.12658	0.66926	6.16588	7.0094e-10	4.11542e-08	1	8	2	66	49	49	up
Ibat.Brg_v3.06AG003860	10.4833	3.64227	0.985973	3.69409	0.000220675	0.00463054	2	1	2	19	22	14	up
Ibat.Brg_v3.06AG004280	87.7736	1.00877	0.297237	3.39383	0.000689221	0.0120454	49	63	77	111	102	115	up
Ibat.Brg_v3.06AG004400	65.8275	2.00378	0.376378	5.32383	1.01602e-07	4.44272e-06	21	22	42	103	114	81	up
Ibat.Brg_v3.06AG006230	110.876	1.05423	0.309946	3.40133	0.0006706	0.0117546	71	77	85	90	173	155	up
Ibat.Brg_v3.06AG007630	559.551	3.35077	0.156323	21.4349	6.31215e-102	4.81786e-99	120	102	100	1069	884	908	up
Ibat.Brg_v3.06AG007890	75.6868	1.28407	0.32259	3.98052	6.87659e-05	0.00169583	49	43	50	129	92	82	up
Ibat.Brg_v3.06AG011010	22.5033	3.89862	0.741702	5.25632	1.46969e-07	6.25612e-06	5	1	3	40	31	46	up
Ibat.Brg_v3.06AG011840	10.0673	3.90199	1.1919	3.27377	0.00106123	0.017296	2	0	2	26	4	22	up
Ibat.Brg_v3.06AG013080	285.587	1.90449	0.19132	9.95449	2.41065e-23	3.74672e-21	126	163	102	466	390	409	up
Ibat.Brg_v3.06AG013790	40.0952	4.97471	0.666585	7.46298	8.45867e-14	7.4694e-12	1	1	6	75	79	65	up
Ibat.Brg_v3.06AG014980	71.1458	1.70991	0.358361	4.77146	1.82894e-06	6.40879e-05	35	24	48	113	112	83	up
Ibat.Brg_v3.06AG015010	15.77	2.90479	0.826775	3.5134	0.000442409	0.00830014	6	6	0	24	28	26	up
Ibat.Brg_v3.06AG015560	47.0438	1.78767	0.505472	3.53664	0.000405259	0.00773112	26	22	20	118	35	53	up
Ibat.Brg_v3.06AG015710	822.383	1.72537	0.108182	15.9488	2.90295e-57	1.20967e-54	350	443	446	1148	1250	1148	up
Ibat.Brg_v3.06AG015720	106.467	1.18437	0.267957	4.42001	9.86986e-06	0.000298731	78	60	71	140	150	126	up
Ibat.Brg_v3.06AG016090	52.2195	2.32689	0.451667	5.15179	2.58011e-07	1.05798e-05	16	16	24	51	86	104	up
Ibat.Brg_v3.06AG017050	7.85343	6.52346	1.5084	4.32475	1.52702e-05	0.000441883	0	0	0	13	16	15	up
Ibat.Brg_v3.06AG017070	97.3874	1.89956	0.301065	6.30948	2.79968e-10	1.72524e-08	53	36	43	131	168	133	up
Ibat.Brg_v3.06AG017430	71.2805	1.14552	0.313803	3.65044	0.000261791	0.00535974	51	47	45	96	87	92	up
Ibat.Brg_v3.06AG017680	5.57741	5.02763	1.6118	3.11927	0.00181299	0.0265457	1	0	0	9	16	6	up
Ibat.Brg_v3.06AG017690	699.14	2.05119	0.121429	16.8921	5.14517e-64	2.46361e-61	242	331	310	1109	1014	1037	up
Ibat.Brg_v3.06AG018110	3464.3	1.20225	0.0665984	18.0522	7.58327e-73	4.26711e-70	2289	2405	2090	4781	4681	4130	up
Ibat.Brg_v3.06AG018120	1009.91	1.96549	0.0941196	20.8829	7.6547e-97	5.41377e-94	406	468	460	1664	1561	1310	up
Ibat.Brg_v3.06AG018130	3779.41	1.59926	0.0531326	30.0995	4.92298e-199	8.43361e-196	1884	2254	1943	5625	5545	4831	up
Ibat.Brg_v3.06AG018140	437.599	1.5911	0.156737	10.1514	3.26768e-24	5.28104e-22	239	278	190	667	686	505	up
Ibat.Brg_v3.06AG018160	724.661	2.2551	0.11026	20.4526	5.69755e-93	3.78641e-90	243	318	254	1165	1156	1049	up
Ibat.Brg_v3.06AG018170	1287.58	2.46708	0.0895233	27.558	3.55046e-167	4.97645e-164	405	491	383	2153	2147	1842	up
Ibat.Brg_v3.06AG018200	698.027	3.14022	0.118297	26.5453	2.90914e-155	3.61719e-152	134	164	163	1225	1206	1095	up
Ibat.Brg_v3.06AG018210	204.806	1.37126	0.217595	6.30186	2.94089e-10	1.80936e-08	129	150	91	305	264	261	up
Ibat.Brg_v3.06AG018420	194.6	3.81961	0.289466	13.1954	9.32853e-40	2.54112e-37	24	20	39	366	275	372	up
Ibat.Brg_v3.06AG018490	10.4487	6.93979	1.55453	4.46425	8.03509e-06	0.000247869	0	0	0	12	44	5	up
Ibat.Brg_v3.06AG018500	32.6531	1.49224	0.490359	3.04315	0.00234113	0.0325478	16	28	12	48	41	46	up
Ibat.Brg_v3.06AG019190	222.979	1.94221	0.199711	9.72512	2.35633e-22	3.47322e-20	90	114	95	404	331	266	up
Ibat.Brg_v3.06AG020010	12.6486	5.35834	1.49612	3.58149	0.000341637	0.00670489	0	2	0	29	1	37	up
Ibat.Brg_v3.06AG020580	21.5136	-6.8017	1.53021	-4.44495	8.79143e-06	0.000268621	1	70	72	0	0	1	down
Ibat.Brg_v3.06AG020740	63.6733	-2.251	0.418766	-5.37532	7.64454e-08	3.41832e-06	100	125	116	21	10	30	down
Ibat.Brg_v3.06AG021670	805.663	3.355	0.135071	24.8388	3.41363e-136	3.46259e-133	137	145	182	1525	1291	1306	up
Ibat.Brg_v3.06AG022380	141.315	1.24982	0.238045	5.25035	1.51807e-07	6.44427e-06	73	104	95	202	164	191	up
Ibat.Brg_v3.06AG024850	60.7623	1.09328	0.336452	3.24944	0.00115633	0.018494	39	50	37	89	82	63	up
Ibat.Brg_v3.06AG025320	712.272	1.1498	0.125428	9.16695	4.86599e-20	6.52381e-18	406	495	534	1051	858	852	up
Ibat.Brg_v3.06AG025880	74.6385	-1.51281	0.325797	-4.6434	3.42721e-06	0.000114028	122	120	115	44	42	24	down
Ibat.Brg_v3.06AG026390	36.9119	1.95214	0.59898	3.25911	0.00111762	0.0179906	25	10	13	23	89	53	up
Ibat.Brg_v3.06AG026700	77.6411	1.34428	0.333761	4.02768	5.63309e-05	0.00142053	31	68	45	94	116	103	up
Ibat.Brg_v3.06AG028320	36.4516	3.03079	0.536076	5.65366	1.57066e-08	7.73196e-07	4	11	11	43	75	64	up
Ibat.Brg_v3.06AG028460	34.5608	-1.52801	0.459925	-3.32231	0.000892765	0.0150264	50	69	48	20	14	16	down
Ibat.Brg_v3.06AG028560	83.3411	1.306	0.411437	3.17425	0.00150227	0.0228647	43	62	51	66	86	172	up
Ibat.Brg_v3.06BG001140	9.88987	-3.04586	0.949128	-3.20911	0.00133146	0.0206774	19	20	18	2	2	2	down
Ibat.Brg_v3.06BG001280	11.5531	-2.82723	0.905342	-3.12283	0.00179118	0.0262664	10	32	25	3	2	3	down
Ibat.Brg_v3.06BG001770	67.5278	1.07833	0.332122	3.24678	0.00116717	0.0186135	46	42	52	107	83	69	up
Ibat.Brg_v3.06BG001980	116.289	3.9969	0.339606	11.7692	5.62272e-32	1.26372e-29	19	9	16	240	194	182	up
Ibat.Brg_v3.06BG001990	11.3881	3.78755	0.989757	3.82675	0.000129847	0.00292089	1	2	2	24	12	23	up
Ibat.Brg_v3.06BG011920	21.1303	4.72848	0.850285	5.56105	2.68157e-08	1.27922e-06	1	2	2	44	46	26	up
Ibat.Brg_v3.06BG012800	22.1932	-2.31139	0.675504	-3.42173	0.000622246	0.0110451	56	40	22	4	11	6	down
Ibat.Brg_v3.06BG014010	79.2962	2.40012	0.327437	7.33002	2.30111e-13	1.94936e-11	24	30	28	120	160	98	up
Ibat.Brg_v3.06BG014640	63.1217	2.34991	0.419038	5.60787	2.04836e-08	9.93756e-07	18	38	12	119	87	91	up
Ibat.Brg_v3.06BG014910	34.1143	1.70002	0.455147	3.7351	0.000187639	0.00401696	15	17	20	57	47	43	up
Ibat.Brg_v3.06BG015320	61.2032	-1.15733	0.383391	-3.01866	0.00253897	0.0346117	84	92	97	38	22	45	down
Ibat.Brg_v3.06BG015350	3333.96	1.92023	0.0603057	31.8416	1.71859e-222	3.39709e-219	1409	1598	1505	5259	4910	4653	up
Ibat.Brg_v3.06BG015690	633.996	1.77173	0.11319	15.6527	3.18318e-55	1.25842e-52	288	341	302	1020	925	818	up
Ibat.Brg_v3.06BG015700	1686.55	1.38862	0.0741956	18.7157	3.68608e-78	2.20279e-75	982	1099	937	2393	2405	2074	up
Ibat.Brg_v3.06BG015710	6.67172	5.29221	1.56013	3.39217	0.000693415	0.0121005	1	0	0	20	9	8	up
Ibat.Brg_v3.06BG015720	226.13	2.6599	0.210805	12.6179	1.68351e-36	4.31169e-34	70	56	73	354	426	321	up
Ibat.Brg_v3.06BG015810	59.8478	1.25243	0.351149	3.56667	0.000361551	0.0070191	36	48	31	69	92	76	up
Ibat.Brg_v3.06BG015950	10.2086	3.09656	0.941456	3.28912	0.00100502	0.0165514	1	3	3	23	17	12	up
Ibat.Brg_v3.06BG016830	29.9226	3.95133	0.665566	5.9368	2.90633e-09	1.59465e-07	1	8	3	42	71	46	up
Ibat.Brg_v3.06BG017700	23.2699	2.15717	0.675657	3.19269	0.00140952	0.0216843	14	6	7	35	18	51	up
Ibat.Brg_v3.06BG018630	77.6798	-1.75478	0.513088	-3.42004	0.000626122	0.0110986	46	235	120	46	16	37	down
Ibat.Brg_v3.06BG019610	48.1562	1.74512	0.595455	2.93073	0.00338166	0.0431395	37	17	16	21	85	98	up
Ibat.Brg_v3.06BG019640	53.5852	-1.33074	0.387824	-3.43129	0.000600707	0.010737	62	99	89	22	29	34	down
Ibat.Brg_v3.06BG020140	105.193	4.16637	0.341557	12.1982	3.17867e-34	7.75455e-32	11	14	11	206	193	163	up
Ibat.Brg_v3.06BG020380	523.837	1.18363	0.122005	9.70147	2.97181e-22	4.34719e-20	319	361	357	660	772	617	up
Ibat.Brg_v3.06BG020920	128.105	1.23054	0.309029	3.98198	6.83446e-05	0.00168661	96	50	98	160	166	176	up
Ibat.Brg_v3.06BG022690	24.6922	-2.02005	0.701198	-2.88086	0.00396594	0.0488471	76	28	20	9	6	12	down
Ibat.Brg_v3.06BG023980	1541.02	1.16013	0.0799264	14.515	9.73983e-48	3.19508e-45	882	1171	1043	2168	2054	1778	up
Ibat.Brg_v3.06BG025050	65.9299	1.53951	0.341006	4.51462	6.34291e-06	0.000199908	40	40	29	109	84	83	up
Ibat.Brg_v3.06BG025780	1170.18	1.0097	0.0904648	11.1612	6.31393e-29	1.26426e-26	734	946	842	1419	1655	1331	up
Ibat.Brg_v3.06BG025850	16.5548	-4.12539	1.15967	-3.5574	0.000374544	0.00722742	73	22	2	2	1	2	down
Ibat.Brg_v3.06BG026680	573.073	1.96152	0.123114	15.9325	3.76926e-57	1.56222e-54	208	284	269	902	926	745	up
Ibat.Brg_v3.06BG027260	374.668	1.15325	0.179132	6.43799	1.21063e-10	7.76436e-09	230	292	232	430	454	555	up
Ibat.Brg_v3.06CG003580	25.0819	-4.1012	1.03228	-3.97297	7.09828e-05	0.00174159	9	139	15	4	4	0	down
Ibat.Brg_v3.06CG003950	38.5432	-6.19053	1.86099	-3.32646	0.000879563	0.0148496	105	6	127	3	0	0	down
Ibat.Brg_v3.06CG004170	824.343	3.16586	0.134146	23.6001	3.84336e-123	3.61323e-120	149	208	180	1512	1246	1397	up
Ibat.Brg_v3.06CG004180	113.049	3.17579	0.33873	9.37556	6.8807e-21	9.59192e-19	29	13	30	203	170	196	up
Ibat.Brg_v3.06CG004200	86.8844	4.26524	0.409038	10.4275	1.85748e-25	3.23966e-23	8	14	6	186	176	108	up
Ibat.Brg_v3.06CG004240	190.456	1.50949	0.199672	7.55987	4.03487e-14	3.66802e-12	94	114	113	243	302	248	up
Ibat.Brg_v3.06CG005890	58.9696	-2.1694	0.376502	-5.76199	8.31301e-09	4.27233e-07	96	112	105	24	25	12	down
Ibat.Brg_v3.06CG007040	332.213	6.19816	0.342221	18.1115	2.58377e-73	1.47543e-70	8	13	8	858	512	484	up
Ibat.Brg_v3.06CG007580	342.638	-1.04119	0.208929	-4.98348	6.24505e-07	2.40355e-05	613	412	448	192	233	204	down
Ibat.Brg_v3.06CG009300	59.4917	-2.0231	0.397899	-5.08445	3.68694e-07	1.47039e-05	89	120	101	17	17	31	down
Ibat.Brg_v3.06CG011050	61.186	1.14996	0.354149	3.24712	0.0011658	0.0186045	38	41	44	105	67	66	up
Ibat.Brg_v3.06CG012270	113.945	1.88239	0.259189	7.26261	3.79681e-13	3.15405e-11	51	51	55	158	173	171	up
Ibat.Brg_v3.06CG012710	13.5039	4.85582	1.47134	3.30028	0.000965879	0.0160232	0	2	1	1	73	3	up
Ibat.Brg_v3.06CG013610	867.718	1.27032	0.15137	8.39214	4.77355e-17	5.34874e-15	412	566	675	1320	1017	1106	up
Ibat.Brg_v3.06CG013850	19.3441	2.72875	0.719995	3.78995	0.000150676	0.00332255	10	2	4	32	38	25	up
Ibat.Brg_v3.06CG013910	237.569	2.29217	0.192775	11.8904	1.32789e-32	3.0376e-30	92	88	80	401	349	357	up
Ibat.Brg_v3.06CG015030	41.0059	4.98056	1.57889	3.15447	0.0016079	0.0241436	4	2	2	52	1	157	up
Ibat.Brg_v3.06CG016510	35.7334	2.26239	0.589869	3.83541	0.000125357	0.00283299	6	8	26	73	63	33	up
Ibat.Brg_v3.06CG016800	68.5022	2.1351	0.388385	5.49739	3.85456e-08	1.79546e-06	31	28	23	102	153	64	up
Ibat.Brg_v3.06CG017570	154.063	1.0244	0.219807	4.66046	3.15508e-06	0.000105488	89	118	123	200	223	161	up
Ibat.Brg_v3.06CG017850	131.446	1.4411	0.230296	6.25759	3.90984e-10	2.36957e-08	73	82	74	178	184	177	up
Ibat.Brg_v3.06CG017870	174.716	2.96282	0.277048	10.6943	1.08263e-26	1.98242e-24	36	29	63	317	280	273	up
Ibat.Brg_v3.06CG017880	107.985	-1.38759	0.405062	-3.42563	0.000613384	0.0109255	255	137	103	76	35	56	down
Ibat.Brg_v3.06CG018540	9.22827	4.90263	1.60271	3.05897	0.00222099	0.031221	0	2	0	46	4	2	up
Ibat.Brg_v3.06CG019260	705.412	1.67632	0.12586	13.319	1.79502e-40	4.97762e-38	282	426	387	1113	986	925	up
Ibat.Brg_v3.06CG019660	60.4738	1.73262	0.400914	4.32167	1.54852e-05	0.00044777	33	28	29	117	56	87	up
Ibat.Brg_v3.06CG020020	18.2412	3.18782	0.942367	3.38278	0.000717569	0.012487	2	8	2	61	31	4	up
Ibat.Brg_v3.06CG020400	12.0158	5.19722	1.56352	3.32404	0.000887221	0.0149435	2	0	0	62	4	2	up
Ibat.Brg_v3.06CG020970	265.456	1.02806	0.205595	5.00043	5.72024e-07	2.21039e-05	176	221	170	429	271	302	up
Ibat.Brg_v3.06CG021530	33.8916	1.76765	0.520908	3.3934	0.000690302	0.0120588	18	24	8	38	52	56	up
Ibat.Brg_v3.06CG022680	198.63	1.71101	0.233871	7.31602	2.5543e-13	2.15675e-11	68	114	121	312	249	291	up
Ibat.Brg_v3.06CG023270	392.5	1.47718	0.224797	6.57117	4.99221e-11	3.3582e-09	178	238	258	363	735	526	up
Ibat.Brg_v3.06CG023540	611.506	1.14037	0.133728	8.52755	1.49485e-17	1.73812e-15	328	439	473	888	770	711	up
Ibat.Brg_v3.06CG025240	24.2942	4.65644	0.779635	5.97259	2.3351e-09	1.2932e-07	2	2	2	56	40	36	up
Ibat.Brg_v3.06CG025340	203.088	-1.26714	0.241728	-5.242	1.58841e-07	6.72068e-06	388	269	260	109	121	105	down
Ibat.Brg_v3.06CG025910	39.3329	4.03658	1.39167	2.90054	0.00372521	0.0465591	1	7	7	187	8	19	up
Ibat.Brg_v3.06DG000010	35.3228	1.99898	0.593143	3.37016	0.000751254	0.0129823	15	19	12	73	76	15	up
Ibat.Brg_v3.06DG000760	37.3274	2.93985	0.557676	5.27162	1.35225e-07	5.79783e-06	4	7	17	80	66	42	up
Ibat.Brg_v3.06DG001120	103.576	3.87861	0.387438	10.0109	1.3648e-23	2.16042e-21	24	8	10	198	209	142	up
Ibat.Brg_v3.06DG001350	44.3295	-2.60487	0.814174	-3.1994	0.00137712	0.0212792	14	227	21	16	15	5	down
Ibat.Brg_v3.06DG001760	61.8672	3.79221	0.453068	8.37007	5.75833e-17	6.40563e-15	5	7	15	119	94	110	up
Ibat.Brg_v3.06DG001780	139.827	3.33418	0.295999	11.2642	1.97237e-29	4.04389e-27	21	32	29	182	278	252	up
Ibat.Brg_v3.06DG002250	74.0625	1.1065	0.314818	3.51471	0.000440226	0.00826523	44	49	59	110	84	90	up
Ibat.Brg_v3.06DG002260	73.3238	1.50433	0.357705	4.20551	2.60496e-05	0.000712874	34	46	44	97	75	128	up
Ibat.Brg_v3.06DG003740	18.5643	-2.88852	0.964958	-2.99342	0.00275871	0.0369666	4	37	67	2	2	8	down
Ibat.Brg_v3.06DG004320	13.9926	4.85721	1.07482	4.51909	6.21062e-06	0.000196139	2	1	0	23	29	24	up
Ibat.Brg_v3.06DG004330	15.7761	5.61685	1.27495	4.40555	1.05517e-05	0.000317498	2	0	0	36	11	38	up
Ibat.Brg_v3.06DG004370	12.9608	4.26834	1.08968	3.91705	8.96383e-05	0.00212753	4	0	0	20	19	29	up
Ibat.Brg_v3.06DG005310	23.3113	8.09465	1.3058	6.199	5.68223e-10	3.38781e-08	0	0	0	36	60	36	up
Ibat.Brg_v3.06DG009810	23.5501	3.5715	0.976259	3.65836	0.000253839	0.00522801	2	6	4	36	2	78	up
Ibat.Brg_v3.06DG010700	7.12444	-4.26965	1.41032	-3.02743	0.00246639	0.0338618	14	17	13	2	0	0	down
Ibat.Brg_v3.06DG010950	19.6435	3.14264	0.707051	4.44471	8.80096e-06	0.000268806	2	4	7	41	26	32	up
Ibat.Brg_v3.06DG012460	13.8109	2.51928	0.811909	3.10291	0.0019163	0.0277163	8	3	2	28	18	20	up
Ibat.Brg_v3.06DG012700	27.8692	1.99306	0.542037	3.67699	0.000236005	0.00491454	13	11	12	50	28	46	up
Ibat.Brg_v3.06DG013460	188.187	3.66868	0.301587	12.1646	4.79929e-34	1.16345e-31	34	41	14	402	279	300	up
Ibat.Brg_v3.06DG014770	10.6457	4.05322	1.29172	3.13785	0.00170189	0.0252403	0	2	2	2	46	10	up
Ibat.Brg_v3.06DG014900	37.4636	2.42368	0.837188	2.89502	0.00379133	0.0471409	12	11	15	19	161	6	up
Ibat.Brg_v3.06DG015410	27.6347	1.65529	0.544396	3.0406	0.00236105	0.0327069	8	24	12	44	44	31	up
Ibat.Brg_v3.06DG015420	21.5302	1.74206	0.574585	3.03185	0.00243058	0.0334476	12	12	8	34	29	30	up
Ibat.Brg_v3.06DG017380	42.6065	1.46865	0.410293	3.57951	0.000344234	0.00674727	22	21	30	65	57	54	up
Ibat.Brg_v3.06DG018040	18.3469	-3.79828	1.11124	-3.41804	0.000630734	0.0111649	90	6	8	4	2	1	down
Ibat.Brg_v3.06DG018420	35.0232	-2.39276	0.795348	-3.00844	0.00262591	0.0355175	9	154	38	6	19	7	down
Ibat.Brg_v3.06DG020950	151.896	1.40367	0.236877	5.92572	3.10926e-09	1.69754e-07	80	77	112	210	226	185	up
Ibat.Brg_v3.06DG021610	10.921	-4.32694	1.45218	-2.97963	0.00288601	0.0381879	16	53	1	0	3	0	down
Ibat.Brg_v3.06DG022580	112.56	-3.10089	0.903212	-3.43318	0.000596537	0.0106897	32	277	361	15	29	22	down
Ibat.Brg_v3.06DG022900	205.718	1.16424	0.218679	5.32399	1.01517e-07	4.44151e-06	94	153	167	298	283	223	up
Ibat.Brg_v3.06DG023070	36.8284	1.38027	0.450899	3.06116	0.00220484	0.0310223	16	32	19	45	59	46	up
Ibat.Brg_v3.06DG024270	55.3585	1.25731	0.366194	3.43347	0.000595919	0.0106811	39	33	33	78	63	77	up
Ibat.Brg_v3.06DG024770	430.638	1.00216	0.140833	7.11598	1.11119e-12	8.74101e-11	298	347	284	497	584	531	up
Ibat.Brg_v3.06DG024780	182.184	2.92356	0.284974	10.259	1.07793e-24	1.79476e-22	47	26	63	322	341	247	up
Ibat.Brg_v3.06DG024790	20.3884	5.41079	1.01114	5.35117	8.73871e-08	3.85835e-06	2	0	1	31	46	35	up
Ibat.Brg_v3.06DG024800	141.825	2.11469	0.235373	8.98442	2.60113e-19	3.33092e-17	59	59	54	241	231	179	up
Ibat.Brg_v3.06DG024820	317.44	1.71894	0.175757	9.78023	1.36894e-22	2.04518e-20	118	170	193	473	473	424	up
Ibat.Brg_v3.06DG024830	377.363	1.40669	0.149496	9.40955	4.98284e-21	6.97145e-19	238	213	215	529	545	468	up
Ibat.Brg_v3.06EG006610	32.5163	1.80805	0.547703	3.30115	0.000962888	0.0159873	25	14	7	49	56	38	up
Ibat.Brg_v3.06EG008200	139.99	1.50785	0.237242	6.35573	2.07441e-10	1.29277e-08	62	93	82	184	195	201	up
Ibat.Brg_v3.06EG008490	25.5178	2.46743	0.601139	4.10458	4.05047e-05	0.0010574	13	8	4	50	39	33	up
Ibat.Brg_v3.06EG008560	29.4103	1.57626	0.51278	3.07395	0.00211246	0.0300129	17	22	9	41	45	38	up
Ibat.Brg_v3.06EG010380	764.536	2.0005	0.120012	16.6691	2.20009e-62	1.02172e-59	278	374	341	1213	1074	1142	up
Ibat.Brg_v3.06EG011360	72.2484	4.71617	0.480898	9.80701	1.05039e-22	1.58463e-20	9	3	5	155	145	95	up
Ibat.Brg_v3.06EG012690	47.7862	1.5289	0.460585	3.31948	0.000901851	0.015127	27	35	18	105	54	43	up
Ibat.Brg_v3.06EG012810	14.6737	3.43998	0.86323	3.98501	6.74773e-05	0.00166939	2	2	4	36	13	26	up
Ibat.Brg_v3.06EG014520	16.8809	2.56093	0.71851	3.56422	0.000364934	0.00707565	4	8	4	37	18	26	up
Ibat.Brg_v3.06EG015040	647.197	1.97341	0.124695	15.8259	2.06363e-56	8.462e-54	244	301	307	1095	919	888	up
Ibat.Brg_v3.06EG015390	1221.04	1.27929	0.277794	4.60516	4.12146e-06	0.000134972	948	679	652	1356	1913	1587	up
Ibat.Brg_v3.06EG015400	1403.74	2.31581	0.0831693	27.8446	1.253e-170	1.78877e-167	451	561	511	2340	2185	2048	up
Ibat.Brg_v3.06EG015410	883.621	1.77861	0.10276	17.3084	4.06722e-67	2.06278e-64	357	481	458	1383	1351	1125	up
Ibat.Brg_v3.06EG015420	161.972	1.85128	0.215371	8.59579	8.26907e-18	9.70262e-16	65	80	83	265	241	209	up
Ibat.Brg_v3.06EG015430	589.373	1.57396	0.127584	12.3366	5.75001e-35	1.4299e-32	285	341	335	797	987	708	up
Ibat.Brg_v3.06EG015450	548.42	3.10473	0.133383	23.2767	7.6292e-120	6.76017e-117	106	146	119	933	994	840	up
Ibat.Brg_v3.06EG015460	1463.41	1.06823	0.07668	13.931	4.10505e-44	1.23136e-41	998	1089	971	1919	2004	1660	up
Ibat.Brg_v3.06EG016450	304.9	1.33509	0.178841	7.46526	8.31373e-14	7.34984e-12	174	180	205	395	382	442	up
Ibat.Brg_v3.06EG017870	36.8705	1.77991	0.600417	2.96445	0.00303221	0.0396595	18	24	12	17	63	77	up
Ibat.Brg_v3.06EG017970	133.28	4.45665	0.353503	12.6071	1.9293e-36	4.90856e-34	6	21	11	240	214	258	up
Ibat.Brg_v3.06EG018170	68.7973	-1.23322	0.337073	-3.65861	0.000253589	0.00522434	86	107	120	30	44	41	down
Ibat.Brg_v3.06EG018580	101.596	1.34382	0.294618	4.56124	5.0852e-06	0.000163833	46	88	54	135	130	143	up
Ibat.Brg_v3.06EG018760	334.341	-3.00774	0.647273	-4.64679	3.37142e-06	0.00011222	649	709	566	34	144	35	down
Ibat.Brg_v3.06EG019690	20.9601	1.76857	0.582452	3.03643	0.00239401	0.0330506	7	12	12	28	33	30	up
Ibat.Brg_v3.06EG021910	56.4504	1.38036	0.39698	3.47714	0.000506787	0.00932193	44	27	29	79	63	85	up
Ibat.Brg_v3.06EG022210	50.9264	2.28059	0.60793	3.7514	0.000175847	0.00379508	22	22	12	40	35	151	up
Ibat.Brg_v3.06EG022920	66.9292	1.54312	0.334817	4.60885	4.04912e-06	0.000132828	32	39	40	99	115	69	up
Ibat.Brg_v3.06EG023670	368.604	-1.29408	0.275767	-4.69264	2.69701e-06	9.17125e-05	257	844	634	215	201	185	down
Ibat.Brg_v3.06EG023710	870.04	1.26532	0.0932146	13.5743	5.69174e-42	1.64953e-39	501	610	547	1245	1188	1029	up
Ibat.Brg_v3.06EG023800	27.3943	1.58641	0.536311	2.958	0.00309645	0.040315	7	20	18	43	39	34	up
Ibat.Brg_v3.06EG025300	158.917	3.10447	0.28426	10.9213	9.12165e-28	1.76238e-25	34	33	40	221	373	213	up
Ibat.Brg_v3.06EG025580	22.8051	1.89404	0.601019	3.15138	0.00162501	0.0242823	15	11	5	36	34	31	up
Ibat.Brg_v3.06EG025620	31.9767	-2.6433	0.751632	-3.51675	0.000436863	0.00821208	31	15	131	10	9	6	down
Ibat.Brg_v3.06FG002690	6.84467	4.44241	1.4357	3.09425	0.00197313	0.0283679	0	2	0	10	16	11	up
Ibat.Brg_v3.06FG002800	55.369	-1.49981	0.439021	-3.41626	0.000634871	0.0112304	49	130	91	18	33	30	down
Ibat.Brg_v3.06FG002850	36.1191	-1.82974	0.602038	-3.03924	0.00237177	0.0328317	38	118	32	9	24	12	down
Ibat.Brg_v3.06FG003060	34.8354	3.16422	0.548824	5.76545	8.14399e-09	4.19105e-07	4	13	6	76	51	50	up
Ibat.Brg_v3.06FG004230	12.8512	4.33222	1.30823	3.3115	0.00092797	0.0154617	0	2	2	8	2	54	up
Ibat.Brg_v3.06FG004450	11.8404	5.24828	1.30783	4.01296	5.99621e-05	0.00150178	0	2	0	26	12	26	up
Ibat.Brg_v3.06FG008000	84.3334	1.55156	0.289353	5.36218	8.22243e-08	3.64082e-06	41	47	51	132	123	100	up
Ibat.Brg_v3.06FG009040	15.9506	3.77462	1.23153	3.06499	0.00217677	0.0307395	1	1	5	5	2	70	up
Ibat.Brg_v3.06FG010020	20.8341	-4.50035	1.04287	-4.31536	1.59343e-05	0.000459892	6	32	93	2	2	1	down
Ibat.Brg_v3.06FG010270	74.0393	3.17184	0.628623	5.0457	4.51864e-07	1.77635e-05	11	15	22	189	18	160	up
Ibat.Brg_v3.06FG011420	94.9931	3.8801	0.372508	10.4161	2.09276e-25	3.63359e-23	12	11	16	174	133	188	up
Ibat.Brg_v3.06FG012760	72.3052	1.42711	0.333945	4.27348	1.92445e-05	0.000542037	47	36	43	124	96	78	up
Ibat.Brg_v3.06FG013190	35.2741	1.76028	0.501814	3.50783	0.000451781	0.00846567	13	14	25	69	37	47	up
Ibat.Brg_v3.06FG014020	41.0088	-1.59021	0.445298	-3.5711	0.000355483	0.00692375	57	63	79	22	13	22	down
Ibat.Brg_v3.06FG014370	5.67287	-5.85275	1.61421	-3.62578	0.00028809	0.00580775	10	15	12	0	0	0	down
Ibat.Brg_v3.06FG014770	67.1975	-1.16599	0.363063	-3.21153	0.0013203	0.0205372	117	95	86	33	34	48	down
Ibat.Brg_v3.06FG014870	30.2866	2.16854	0.530068	4.09106	4.29408e-05	0.00111381	10	17	9	35	64	41	up
Ibat.Brg_v3.06FG014880	28.2358	1.71296	0.51554	3.32266	0.000891642	0.0150113	13	20	10	40	38	43	up
Ibat.Brg_v3.06FG015320	186.851	1.52501	0.202251	7.54018	4.69328e-14	4.24654e-12	86	112	115	284	285	215	up
Ibat.Brg_v3.06FG015330	332.861	1.4335	0.156581	9.15499	5.43612e-20	7.23783e-18	208	193	179	475	477	415	up
Ibat.Brg_v3.06FG015340	10.9377	3.18172	0.96542	3.29568	0.000981823	0.016231	3	3	1	10	17	27	up
Ibat.Brg_v3.06FG015610	184.685	2.99641	0.254305	11.7828	4.78982e-32	1.07967e-29	38	61	35	346	261	312	up
Ibat.Brg_v3.06FG015690	149.152	-1.05457	0.228902	-4.60708	4.08354e-06	0.000133901	204	256	194	110	91	73	down
Ibat.Brg_v3.06FG015710	44.3619	1.60207	0.458004	3.49794	0.000468867	0.00873911	28	12	30	65	61	61	up
Ibat.Brg_v3.06FG015740	64.9421	1.08994	0.358741	3.03824	0.00237965	0.0328964	34	48	53	111	66	72	up
Ibat.Brg_v3.06FG015780	104.682	-1.32856	0.306007	-4.3416	1.41448e-05	0.00041197	173	162	147	64	38	64	down
Ibat.Brg_v3.06FG017690	13.3544	-2.69538	0.882512	-3.05422	0.0022565	0.0315946	24	29	22	0	6	4	down
Ibat.Brg_v3.06FG018060	66.381	1.25236	0.358277	3.49551	0.000473149	0.0088104	43	30	53	105	87	72	up
Ibat.Brg_v3.06FG018720	38.5603	-1.36164	0.420614	-3.23728	0.00120676	0.0190908	56	66	58	20	24	17	down
Ibat.Brg_v3.06FG018870	26.3135	3.9989	0.697622	5.73219	9.91423e-09	5.0249e-07	3	2	5	68	43	30	up
Ibat.Brg_v3.06FG019530	93.8149	1.67071	0.487827	3.4248	0.000615263	0.0109489	63	36	44	67	274	70	up
Ibat.Brg_v3.06FG019640	57.9214	1.19549	0.38985	3.06653	0.00216561	0.0306156	25	61	30	78	78	71	up
Ibat.Brg_v3.06FG020690	19.0498	2.92835	1.01037	2.89829	0.00375204	0.0467882	8	4	2	6	8	74	up
Ibat.Brg_v3.06FG022020	39.9271	1.55339	0.46696	3.32659	0.000879144	0.0148463	15	22	29	79	42	47	up
Ibat.Brg_v3.06FG022380	180.851	1.24488	0.36785	3.38422	0.000713815	0.0124301	147	110	87	349	294	91	up
Ibat.Brg_v3.06FG022400	228.026	1.29485	0.186925	6.92711	4.29516e-12	3.15046e-10	135	148	144	285	302	319	up
Ibat.Brg_v3.06FG022910	41.8175	3.94204	0.795469	4.95562	7.21017e-07	2.74485e-05	12	2	2	110	107	12	up
Ibat.Brg_v3.06FG023290	39.141	2.21996	0.491676	4.51509	6.32899e-06	0.000199551	20	8	16	67	51	62	up
Ibat.Brg_v3.06FG024390	55.1601	1.11113	0.371992	2.98699	0.00281743	0.0375252	31	37	45	70	60	80	up
Ibat.Brg_v3.06FG024810	159.397	2.53239	0.235535	10.7516	5.82155e-27	1.08402e-24	51	53	48	244	309	215	up
Ibat.Brg_v3.07AG000160	7.81625	6.51211	1.6098	4.04529	5.22588e-05	0.00132958	0	0	0	5	10	27	up
Ibat.Brg_v3.07AG001480	332.204	3.96806	0.208856	18.9991	1.73591e-80	1.07921e-77	32	59	39	625	538	587	up
Ibat.Brg_v3.07AG001490	247.385	4.30836	0.244193	17.6433	1.14609e-69	5.96975e-67	27	31	19	489	402	430	up
Ibat.Brg_v3.07AG001500	1018.51	2.05415	0.112218	18.305	7.54618e-75	4.40708e-72	368	439	474	1694	1434	1480	up
Ibat.Brg_v3.07AG001510	2568.22	3.43496	0.0843424	40.7263	0	0	424	490	494	4639	4203	4341	up
Ibat.Brg_v3.07AG001750	48.7892	2.14045	0.442975	4.832	1.35168e-06	4.90359e-05	9	21	29	78	85	62	up
Ibat.Brg_v3.07AG002780	14.2146	2.24207	0.736879	3.04265	0.00234503	0.0325727	5	5	6	21	17	27	up
Ibat.Brg_v3.07AG004810	10.6695	-4.79903	1.54672	-3.1027	0.00191763	0.0277215	8	2	56	0	0	2	down
Ibat.Brg_v3.07AG006140	31.3275	6.66611	1.14788	5.80732	6.34826e-09	3.31339e-07	0	2	0	67	79	32	up
Ibat.Brg_v3.07AG007360	239.92	1.08617	0.167807	6.4727	9.62643e-11	6.26246e-09	153	182	163	304	332	282	up
Ibat.Brg_v3.07AG007370	466.804	1.40288	0.165426	8.48041	2.24411e-17	2.56942e-15	235	265	329	685	557	653	up
Ibat.Brg_v3.07AG011190	82.3026	3.30443	0.412279	8.01503	1.10111e-15	1.13786e-13	27	9	12	137	131	149	up
Ibat.Brg_v3.07AG011200	1634.64	6.46625	0.433221	14.926	2.23291e-50	8.04368e-48	62	30	24	3329	3117	2666	up
Ibat.Brg_v3.07AG012670	57.2512	-1.70027	0.363657	-4.67548	2.9327e-06	9.87687e-05	87	119	79	26	28	22	down
Ibat.Brg_v3.07AG013830	26.8492	-1.53473	0.53244	-2.88245	0.00394593	0.0486707	30	58	43	17	12	10	down
Ibat.Brg_v3.07AG017070	264.536	1.20553	0.160994	7.48806	6.98982e-14	6.20075e-12	158	192	169	374	359	307	up
Ibat.Brg_v3.07AG017100	36.1803	1.83843	0.463775	3.96406	7.36859e-05	0.00179989	18	18	15	47	47	63	up
Ibat.Brg_v3.07AG017110	34.4379	1.92914	0.53424	3.61099	0.000305029	0.00610454	22	17	7	68	52	35	up
Ibat.Brg_v3.07AG018110	170.351	1.58184	0.204683	7.72825	1.09032e-14	1.03461e-12	77	101	99	247	253	219	up
Ibat.Brg_v3.07AG018130	186.563	1.0851	0.193033	5.62131	1.89512e-08	9.22901e-07	128	129	129	242	242	228	up
Ibat.Brg_v3.07AG018630	34.5761	-2.2858	0.626489	-3.64859	0.000263684	0.00539189	87	51	44	4	8	20	down
Ibat.Brg_v3.07AG019040	16.4239	2.75362	0.845384	3.25724	0.00112501	0.018087	2	8	4	37	8	34	up
Ibat.Brg_v3.07AG019620	49.5978	1.46656	0.430819	3.40413	0.000663748	0.0116663	16	29	41	89	62	55	up
Ibat.Brg_v3.07AG019810	21.6104	2.96009	0.635522	4.65773	3.19713e-06	0.000106788	4	6	6	45	32	31	up
Ibat.Brg_v3.07AG022150	1064.07	-1.2236	0.087428	-13.9955	1.66033e-44	5.0194e-42	1451	1699	1679	631	646	522	down
Ibat.Brg_v3.07AG022190	74.1226	-1.38129	0.352705	-3.91628	8.9924e-05	0.00213353	75	148	128	31	41	43	down
Ibat.Brg_v3.07AG022560	155.274	1.20891	0.230957	5.23436	1.65557e-07	6.98297e-06	80	130	96	234	189	187	up
Ibat.Brg_v3.07AG022600	327.375	-1.05188	0.157565	-6.67583	2.45835e-11	1.68908e-09	500	476	448	205	217	178	down
Ibat.Brg_v3.07AG022610	1018.16	-1.09555	0.0888694	-12.3276	6.4337e-35	1.59477e-32	1427	1544	1516	646	654	530	down
Ibat.Brg_v3.07AG022970	36.7633	4.24027	0.598036	7.09033	1.33792e-12	1.04182e-10	4	6	2	68	57	70	up
Ibat.Brg_v3.07AG023100	111.179	1.5363	0.304219	5.04997	4.4189e-07	1.73891e-05	83	50	49	155	176	135	up
Ibat.Brg_v3.07AG023430	73.5535	-1.76328	0.539822	-3.26642	0.00108918	0.0176323	56	273	54	24	38	32	down
Ibat.Brg_v3.07AG023710	27.3446	2.17983	0.53188	4.09834	4.16116e-05	0.00108373	10	11	11	33	53	40	up
Ibat.Brg_v3.07BG001550	430.082	3.98379	0.175539	22.6947	5.05739e-114	4.38061e-111	53	70	43	768	848	666	up
Ibat.Brg_v3.07BG001560	154.515	4.82862	0.328298	14.7081	5.72244e-49	1.95196e-46	10	11	13	287	259	289	up
Ibat.Brg_v3.07BG001580	1598.97	3.57161	0.102714	34.7723	6.38164e-265	1.58697e-261	206	289	311	3001	2870	2444	up
Ibat.Brg_v3.07BG002470	15.4816	2.66845	0.865168	3.08432	0.00204019	0.0291593	0	7	7	26	38	13	up
Ibat.Brg_v3.07BG003030	12.8068	3.42819	0.925323	3.70486	0.000211506	0.0044537	4	3	0	28	19	19	up
Ibat.Brg_v3.07BG003600	9.61206	3.18039	1.0721	2.96651	0.00301198	0.0394753	4	0	2	10	26	13	up
Ibat.Brg_v3.07BG005790	32.0629	-2.01609	0.695257	-2.89977	0.00373432	0.0466276	12	118	44	10	16	10	down
Ibat.Brg_v3.07BG006360	99.2709	1.41224	0.311904	4.52779	5.96024e-06	0.000188541	74	41	58	148	137	121	up
Ibat.Brg_v3.07BG008130	22.5082	3.36488	1.00183	3.35872	0.00078303	0.0134469	3	6	4	11	4	92	up
Ibat.Brg_v3.07BG009560	114.763	-4.3208	1.47668	-2.92603	0.00343315	0.0436839	184	538	10	13	18	1	down
Ibat.Brg_v3.07BG010280	27.3845	6.45556	1.19719	5.39226	6.95784e-08	3.12576e-06	0	0	2	94	35	26	up
Ibat.Brg_v3.07BG012550	19.3868	3.37011	1.11082	3.03388	0.00241432	0.0332594	5	4	2	95	6	2	up
Ibat.Brg_v3.07BG015240	14.9805	2.83245	0.796731	3.5551	0.000377842	0.00728267	2	4	6	14	29	30	up
Ibat.Brg_v3.07BG016680	20.4413	-3.25289	0.863664	-3.76638	0.000165631	0.00360509	56	10	50	7	2	2	down
Ibat.Brg_v3.07BG017020	10.4925	2.53006	0.876366	2.88699	0.00388942	0.0480659	4	4	2	12	20	18	up
Ibat.Brg_v3.07BG017220	86.4987	1.27988	0.307178	4.16659	3.09193e-05	0.000828291	36	68	61	132	108	105	up
Ibat.Brg_v3.07BG017270	34.0022	1.64269	0.51509	3.18913	0.00142702	0.0218967	24	19	10	67	44	35	up
Ibat.Brg_v3.07BG017770	104.272	1.41194	0.337175	4.18755	2.81984e-05	0.000763277	44	44	96	154	139	133	up
Ibat.Brg_v3.07BG017790	1318.38	1.06634	0.0798475	13.3547	1.11194e-40	3.12844e-38	895	946	914	1683	1782	1554	up
Ibat.Brg_v3.07BG018080	16.3475	2.34637	0.779039	3.01188	0.00259639	0.0352077	9	2	6	20	42	16	up
Ibat.Brg_v3.07BG018740	299.631	-1.3082	0.185001	-7.07132	1.53467e-12	1.18085e-10	485	414	474	157	197	133	down
Ibat.Brg_v3.07BG018760	11.1581	3.43419	1.08863	3.1546	0.00160719	0.0241376	2	0	4	9	12	34	up
Ibat.Brg_v3.07BG018770	24.4345	2.57187	0.60983	4.21735	2.47187e-05	0.000678379	4	10	9	39	29	48	up
Ibat.Brg_v3.07BG020860	14.4032	2.88986	0.830373	3.4802	0.000501043	0.00923169	5	3	3	38	25	10	up
Ibat.Brg_v3.07BG021190	26.4809	1.65395	0.564986	2.92741	0.00341795	0.0435376	13	10	18	37	26	48	up
Ibat.Brg_v3.07BG021660	40.7692	-1.23715	0.429265	-2.88203	0.00395126	0.0487157	45	72	70	24	29	16	down
Ibat.Brg_v3.07BG021890	70.8584	1.14917	0.347096	3.31082	0.000930217	0.0154949	28	56	60	89	93	92	up
Ibat.Brg_v3.07BG022040	22.2687	1.69956	0.562008	3.02408	0.0024939	0.034118	10	13	11	32	28	35	up
Ibat.Brg_v3.07BG022830	19.1671	-4.39913	1.24434	-3.53532	0.000407279	0.00776004	23	100	1	4	1	0	down
Ibat.Brg_v3.07CG000640	461.318	1.05348	0.140157	7.51644	5.62886e-14	5.05744e-12	299	347	326	696	551	508	up
Ibat.Brg_v3.07CG001930	191.647	1.02571	0.256102	4.00509	6.19934e-05	0.00154863	120	140	149	164	327	232	up
Ibat.Brg_v3.07CG002690	7.13351	3.82682	1.29062	2.9651	0.00302583	0.0395895	1	0	2	17	6	14	up
Ibat.Brg_v3.07CG002700	51.0747	3.54213	0.47768	7.41528	1.21372e-13	1.05486e-11	8	6	12	81	75	105	up
Ibat.Brg_v3.07CG002720	137.27	3.51951	0.344035	10.2301	1.45416e-24	2.39022e-22	10	27	35	187	301	223	up
Ibat.Brg_v3.07CG005390	100.753	2.33414	0.300422	7.76954	7.87699e-15	7.57154e-13	31	37	40	178	128	164	up
Ibat.Brg_v3.07CG005410	14.5717	2.34029	0.811079	2.8854	0.00390911	0.0482783	2	11	3	15	27	26	up
Ibat.Brg_v3.07CG005420	63.6882	1.4469	0.332861	4.34687	1.38096e-05	0.000403862	31	42	38	81	90	90	up
Ibat.Brg_v3.07CG007150	84.3927	1.06951	0.294881	3.62691	0.000286828	0.00578685	44	77	57	114	110	98	up
Ibat.Brg_v3.07CG007740	5.49183	5.00193	1.59466	3.13668	0.00170872	0.0253269	1	0	0	10	11	9	up
Ibat.Brg_v3.07CG007800	10.1493	3.02123	1.02503	2.94745	0.00320402	0.0413413	4	0	3	20	10	20	up
Ibat.Brg_v3.07CG008260	26.9045	2.00122	0.603169	3.31784	0.00090715	0.0151796	11	17	7	30	29	59	up
Ibat.Brg_v3.07CG008660	176.817	1.72996	0.220242	7.85482	4.00334e-15	3.93132e-13	91	100	74	228	280	254	up
Ibat.Brg_v3.07CG008910	40.0679	1.90299	0.645838	2.94655	0.00321339	0.0414455	19	12	23	30	25	114	up
Ibat.Brg_v3.07CG009750	51.6863	-1.11927	0.381359	-2.93496	0.00333588	0.0426897	73	93	64	40	27	25	down
Ibat.Brg_v3.07CG010090	73.147	1.26698	0.334433	3.78846	0.000151586	0.00334166	33	56	51	90	88	110	up
Ibat.Brg_v3.07CG011510	21.0191	2.39161	0.738634	3.23788	0.0012042	0.0190675	4	9	9	10	46	42	up
Ibat.Brg_v3.07CG012550	11.3014	5.15245	1.46511	3.51677	0.000436835	0.00821208	0	0	2	2	40	20	up
Ibat.Brg_v3.07CG018150	218.338	1.61267	0.204545	7.8842	3.16559e-15	3.14884e-13	91	132	127	356	273	295	up
Ibat.Brg_v3.07CG019290	205.844	1.31112	0.259354	5.05533	4.29655e-07	1.69422e-05	78	123	184	294	273	258	up
Ibat.Brg_v3.07CG020860	117.858	-1.36274	0.296471	-4.59652	4.29607e-06	0.000140154	161	168	219	43	69	72	down
Ibat.Brg_v3.07DG001010	18.9033	4.26221	0.882433	4.83007	1.36488e-06	4.94217e-05	4	2	0	52	27	23	up
Ibat.Brg_v3.07DG001160	105.414	1.25753	0.274182	4.58649	4.50765e-06	0.000146499	58	61	82	160	130	128	up
Ibat.Brg_v3.07DG002540	37.6106	1.73873	0.480934	3.61531	0.000299983	0.00602241	9	26	22	46	58	58	up
Ibat.Brg_v3.07DG003720	64.6344	-1.58561	0.509718	-3.11075	0.00186611	0.027143	180	50	73	23	41	27	down
Ibat.Brg_v3.07DG004060	18.7159	2.61598	0.695418	3.76173	0.00016874	0.00366222	7	8	2	34	25	31	up
Ibat.Brg_v3.07DG004080	34.739	2.92131	0.643034	4.54301	5.54556e-06	0.000176875	0	15	12	58	62	53	up
Ibat.Brg_v3.07DG004330	62.5816	1.56157	0.368405	4.23873	2.24789e-05	0.000622226	25	35	43	116	83	66	up
Ibat.Brg_v3.07DG005980	55.2014	5.64203	1.87071	3.01598	0.00256149	0.0348527	2	2	3	178	0	121	up
Ibat.Brg_v3.07DG006310	99.3282	1.77146	0.275908	6.42048	1.35843e-10	8.62612e-09	51	45	49	136	154	141	up
Ibat.Brg_v3.07DG006890	19.3701	7.82654	1.34381	5.82416	5.73991e-09	3.01424e-07	0	0	0	22	52	35	up
Ibat.Brg_v3.07DG006910	70.8009	9.696	1.22072	7.94286	1.97573e-15	2.00144e-13	0	0	0	149	118	130	up
Ibat.Brg_v3.07DG006940	331.546	4.75176	0.222161	21.3888	1.69794e-101	1.28328e-98	24	32	21	584	688	531	up
Ibat.Brg_v3.07DG007130	18.1153	2.4806	0.702695	3.53013	0.00041536	0.00789256	6	10	2	34	30	23	up
Ibat.Brg_v3.07DG007910	58.2738	-1.61158	0.511329	-3.15175	0.00162293	0.0242653	79	121	86	10	20	48	down
Ibat.Brg_v3.07DG009090	32.8518	-1.58144	0.54493	-2.9021	0.00370669	0.0463727	46	85	31	16	22	9	down
Ibat.Brg_v3.07DG012350	34.4693	8.65732	1.26292	6.85502	7.13012e-12	5.13222e-10	0	0	0	73	55	65	up
Ibat.Brg_v3.07DG012360	1752.33	6.78451	0.162459	41.7615	0	0	32	30	40	3566	3214	2990	up
Ibat.Brg_v3.07DG014900	29.5468	1.82302	0.593412	3.07209	0.00212564	0.0301639	14	12	16	26	80	26	up
Ibat.Brg_v3.07DG017070	29.4136	-2.92277	0.904102	-3.23279	0.00122587	0.0193375	135	11	12	6	5	8	down
Ibat.Brg_v3.07DG018090	25.4028	2.41465	0.605449	3.9882	6.65769e-05	0.00165136	5	6	15	51	38	32	up
Ibat.Brg_v3.07DG018120	91.7083	1.69888	0.313135	5.42538	5.78302e-08	2.63172e-06	38	45	57	173	115	108	up
Ibat.Brg_v3.07DG019710	70.1637	1.49914	0.339423	4.41673	1.00205e-05	0.000302934	31	56	33	115	97	81	up
Ibat.Brg_v3.07DG020910	72.0514	1.90075	0.361268	5.26133	1.43017e-07	6.11152e-06	30	39	30	130	132	63	up
Ibat.Brg_v3.07DG020930	184.538	1.19091	0.193136	6.16616	6.99704e-10	4.11129e-08	116	129	119	266	251	207	up
Ibat.Brg_v3.07DG024750	30.2697	-2.7925	0.957033	-2.91787	0.00352426	0.0445824	11	12	148	1	9	11	down
Ibat.Brg_v3.07EG001400	37.9013	-1.4857	0.457837	-3.24504	0.00117434	0.0187045	64	75	42	22	16	18	down
Ibat.Brg_v3.07EG001860	12.4215	4.25237	1.19671	3.55339	0.000380301	0.00732203	0	0	4	6	28	31	up
Ibat.Brg_v3.07EG001880	4901.57	3.37077	0.0690959	48.7838	0	0	795	1012	997	8984	8164	7961	up
Ibat.Brg_v3.07EG001890	223.058	3.51101	0.233764	15.0194	5.47694e-51	2.01056e-48	27	45	45	405	349	394	up
Ibat.Brg_v3.07EG001900	578.822	3.25678	0.177704	18.3269	5.04427e-75	2.99125e-72	71	140	147	981	996	964	up
Ibat.Brg_v3.07EG001910	244.185	3.17631	0.212785	14.9273	2.18821e-50	7.91967e-48	40	59	59	415	386	429	up
Ibat.Brg_v3.07EG001920	6249.25	3.40068	0.0679734	50.0296	0	0	1045	1283	1178	11429	10148	10449	up
Ibat.Brg_v3.07EG001930	75.4236	2.79902	0.383649	7.29578	2.96943e-13	2.4801e-11	17	31	14	114	169	92	up
Ibat.Brg_v3.07EG002170	128.142	1.42188	0.251932	5.64393	1.66215e-08	8.16667e-07	72	71	82	158	219	150	up
Ibat.Brg_v3.07EG005210	17.8417	3.24846	0.757992	4.28561	1.8224e-05	0.000517453	4	5	2	28	21	40	up
Ibat.Brg_v3.07EG005230	135.413	3.33212	0.318094	10.4753	1.12215e-25	1.9841e-23	15	36	29	241	184	261	up
Ibat.Brg_v3.07EG005240	194.525	1.67305	0.231751	7.21919	5.22999e-13	4.25744e-11	115	116	69	292	300	243	up
Ibat.Brg_v3.07EG006240	67.0971	-1.80731	0.553318	-3.2663	0.00108962	0.0176357	194	62	71	38	39	9	down
Ibat.Brg_v3.07EG007740	47.5258	1.14794	0.38762	2.96151	0.00306132	0.0399859	35	29	31	55	63	65	up
Ibat.Brg_v3.07EG007770	37.1186	2.56159	0.467583	5.47838	4.29249e-08	1.98386e-06	9	14	12	71	56	52	up
Ibat.Brg_v3.07EG008300	39.128	8.84012	1.25176	7.06217	1.63924e-12	1.2574e-10	0	0	0	66	77	76	up
Ibat.Brg_v3.07EG008570	32.9507	1.99202	0.504662	3.94723	7.90605e-05	0.00190939	11	14	18	69	49	32	up
Ibat.Brg_v3.07EG009720	60.8077	-1.18149	0.382631	-3.08781	0.0020164	0.0288715	94	105	74	22	43	39	down
Ibat.Brg_v3.07EG010390	113.485	-1.20547	0.398313	-3.02645	0.00247441	0.0339296	210	97	195	40	59	90	down
Ibat.Brg_v3.07EG013000	16.7849	2.33972	0.680491	3.43828	0.000585417	0.0105468	4	6	8	23	32	24	up
Ibat.Brg_v3.07EG013230	13.6208	3.56846	1.17329	3.04141	0.00235474	0.0326428	2	5	0	2	54	16	up
Ibat.Brg_v3.07EG013330	89.8012	5.15452	0.486192	10.6018	2.92184e-26	5.29988e-24	0	6	10	168	145	175	up
Ibat.Brg_v3.07EG013340	15.0648	3.19206	1.02183	3.12387	0.00178488	0.0261989	1	9	0	24	10	40	up
Ibat.Brg_v3.07EG013390	319.459	5.22352	0.244993	21.3211	7.24012e-101	5.36674e-98	18	23	13	601	613	537	up
Ibat.Brg_v3.07EG013400	69.3912	1.08062	0.317362	3.40501	0.000661605	0.0116339	41	58	46	105	86	75	up
Ibat.Brg_v3.07EG014890	83.9467	-1.21441	0.332678	-3.6504	0.000261834	0.00535974	94	121	166	62	44	37	down
Ibat.Brg_v3.07EG017670	270.044	2.14689	0.209378	10.2537	1.13952e-24	1.88915e-22	128	90	101	470	379	388	up
Ibat.Brg_v3.07EG020220	58.7399	1.18989	0.412832	2.88226	0.00394838	0.0486931	43	35	37	104	45	79	up
Ibat.Brg_v3.07EG020370	15.5209	-2.16549	0.704381	-3.07431	0.00210988	0.0299872	24	24	34	6	6	4	down
Ibat.Brg_v3.07EG020450	32.4001	1.8505	0.545462	3.39253	0.000692499	0.0120917	15	25	6	52	41	49	up
Ibat.Brg_v3.07EG020830	753.729	1.24516	0.132305	9.41126	4.90217e-21	6.87105e-19	397	627	436	1060	1100	836	up
Ibat.Brg_v3.07EG020900	44.7212	1.41025	0.413271	3.4124	0.000643928	0.0113698	22	22	35	72	57	54	up
Ibat.Brg_v3.07EG020980	70.5248	1.64753	0.554412	2.97166	0.0029619	0.0389713	60	32	16	57	61	171	up
Ibat.Brg_v3.07EG021470	17.1026	3.38393	1.06998	3.1626	0.00156368	0.023599	2	8	0	66	21	4	up
Ibat.Brg_v3.07EG023150	96.1423	2.12539	0.311391	6.82547	8.7639e-12	6.28473e-10	34	37	45	189	119	132	up
Ibat.Brg_v3.07EG023170	2270.98	1.28035	0.066229	19.3321	2.88415e-83	1.83752e-80	1408	1485	1389	3137	3122	2790	up
Ibat.Brg_v3.07EG023190	520.02	-1.80475	0.131854	-13.6875	1.20527e-42	3.54635e-40	789	965	870	255	225	174	down
Ibat.Brg_v3.07EG025240	34.0278	-2.61769	0.847878	-3.08735	0.00201951	0.0289032	143	29	8	15	6	6	down
Ibat.Brg_v3.07FG001380	127.628	4.69074	0.347264	13.5077	1.40815e-41	4.02052e-39	6	15	10	247	235	210	up
Ibat.Brg_v3.07FG001410	12.796	7.22621	1.56727	4.6107	4.01316e-06	0.00013193	0	0	0	2	31	37	up
Ibat.Brg_v3.07FG001420	17.1891	3.19217	0.74063	4.31008	1.63199e-05	0.000469463	2	3	6	31	28	28	up
Ibat.Brg_v3.07FG001430	355.707	2.54488	0.157923	16.1147	2.01058e-58	8.61087e-56	91	124	123	565	623	522	up
Ibat.Brg_v3.07FG003270	9.67013	6.82761	1.73536	3.93441	8.34005e-05	0.00200104	0	0	0	3	52	2	up
Ibat.Brg_v3.07FG004150	14.5063	-3.69543	1.24641	-2.96486	0.00302817	0.0396134	10	76	6	6	0	0	down
Ibat.Brg_v3.07FG004420	76.6255	2.73298	0.427054	6.39961	1.55776e-10	9.80308e-09	33	20	11	93	174	109	up
Ibat.Brg_v3.07FG004540	11.3691	3.25733	0.895357	3.63802	0.00027474	0.0055839	2	3	2	24	17	17	up
Ibat.Brg_v3.07FG004570	32.4964	2.36473	0.49044	4.82165	1.42379e-06	5.13375e-05	12	9	13	54	52	47	up
Ibat.Brg_v3.07FG004580	61.6782	1.98648	0.366862	5.41478	6.13628e-08	2.78262e-06	17	30	34	92	90	94	up
Ibat.Brg_v3.07FG004790	96.1222	1.37131	0.320092	4.28412	1.83466e-05	0.000520552	60	45	67	98	147	142	up
Ibat.Brg_v3.07FG005300	21.8189	1.77369	0.572549	3.09789	0.00194903	0.0280738	10	11	11	38	36	22	up
Ibat.Brg_v3.07FG006880	34.0874	3.03841	0.512953	5.92336	3.15428e-09	1.71847e-07	6	8	10	66	53	52	up
Ibat.Brg_v3.07FG007360	125.772	4.86524	0.359095	13.5486	8.073e-42	2.33089e-39	8	8	11	242	224	217	up
Ibat.Brg_v3.07FG007610	103.333	2.23727	0.295282	7.57674	3.54351e-14	3.2366e-12	41	46	30	146	157	173	up
Ibat.Brg_v3.07FG007920	154.311	1.07164	0.208999	5.12748	2.93646e-07	1.19206e-05	101	111	110	194	218	177	up
Ibat.Brg_v3.07FG007970	13.4814	5.44973	1.49044	3.65647	0.000255714	0.00526523	0	2	0	4	7	58	up
Ibat.Brg_v3.07FG008210	58.4536	2.12236	0.546566	3.88309	0.000103139	0.00239709	23	29	19	153	101	22	up
Ibat.Brg_v3.07FG009590	291.087	1.29458	0.180422	7.17526	7.21718e-13	5.76552e-11	135	218	197	380	453	335	up
Ibat.Brg_v3.07FG010400	2690.27	1.00451	0.0793626	12.6572	1.02035e-36	2.6574e-34	2019	1971	1784	3386	3648	3073	up
Ibat.Brg_v3.07FG011210	76.6538	1.14365	0.338572	3.37786	0.000730513	0.0126859	33	58	65	92	127	80	up
Ibat.Brg_v3.07FG011420	36.9564	-4.14023	1.42143	-2.91271	0.00358304	0.0451261	5	206	30	1	5	5	down
Ibat.Brg_v3.07FG011510	132.362	-1.08696	0.316768	-3.43141	0.000600448	0.0107348	221	206	152	55	72	107	down
Ibat.Brg_v3.07FG012510	28.4966	8.38626	1.33736	6.27076	3.59291e-10	2.18781e-08	0	0	0	45	99	21	up
Ibat.Brg_v3.07FG012520	77.3244	3.73556	0.408566	9.1431	6.06883e-20	8.0386e-18	9	10	16	137	182	91	up
Ibat.Brg_v3.07FG012530	72.6509	3.19755	0.404813	7.89883	2.81525e-15	2.81854e-13	13	9	24	152	117	101	up
Ibat.Brg_v3.07FG014260	14.3463	-3.22555	0.942385	-3.42275	0.000619917	0.0110165	41	17	24	2	6	0	down
Ibat.Brg_v3.07FG019450	527.659	1.10456	0.127913	8.63523	5.86065e-18	6.92941e-16	299	440	352	716	709	605	up
Ibat.Brg_v3.07FG020320	89.4806	1.10517	0.307036	3.59947	0.000318863	0.00633045	40	81	65	126	105	112	up
Ibat.Brg_v3.07FG020970	72.7394	1.36926	0.323977	4.22641	2.37447e-05	0.000654209	33	49	50	95	92	106	up
Ibat.Brg_v3.07FG020990	3111.8	1.05707	0.0667141	15.8448	1.52702e-56	6.2951e-54	2210	2242	2072	4110	4112	3606	up
Ibat.Brg_v3.07FG021080	58.2564	-1.47152	0.367444	-4.00475	6.20822e-05	0.00155035	77	112	90	22	38	27	down
Ibat.Brg_v3.07FG023370	16.7122	2.18116	0.757963	2.87767	0.00400629	0.0492183	4	12	4	36	32	11	up
Ibat.Brg_v3.07FG024150	95.0718	-1.18646	0.268929	-4.41181	1.02508e-05	0.00030929	136	160	132	55	55	53	down
Ibat.Brg_v3.07FG024600	40.3061	-1.90897	0.61194	-3.11954	0.00181133	0.0265313	29	49	129	8	18	21	down
Ibat.Brg_v3.07FG025010	113.455	-1.1471	0.287241	-3.99353	6.50972e-05	0.00161778	183	200	123	70	80	50	down
Ibat.Brg_v3.07FG025380	69.6934	-1.20845	0.365886	-3.3028	0.000957248	0.0159074	76	156	88	34	51	34	down
Ibat.Brg_v3.07FG025520	224.482	1.77928	0.339883	5.23497	1.65011e-07	6.96641e-06	88	164	80	287	191	474	up
Ibat.Brg_v3.07FG025990	15.527	-3.56865	1.10969	-3.21589	0.00130042	0.0203139	17	76	4	3	4	0	down
Ibat.Brg_v3.08AG002890	28.1514	1.67583	0.516522	3.24444	0.0011768	0.0187322	10	21	13	49	37	35	up
Ibat.Brg_v3.08AG003790	83.8714	-1.6762	0.310126	-5.4049	6.48458e-08	2.92508e-06	114	146	155	33	49	31	down
Ibat.Brg_v3.08AG004080	72.644	1.18788	0.332324	3.57445	0.000350962	0.00685126	46	62	36	94	86	102	up
Ibat.Brg_v3.08AG004490	70.9568	-1.05893	0.355908	-2.9753	0.002927	0.0386175	87	140	86	34	41	53	down
Ibat.Brg_v3.08AG005180	111.335	-1.73552	0.270329	-6.42001	1.36264e-10	8.64576e-09	167	202	186	38	54	52	down
Ibat.Brg_v3.08AG005790	110.797	1.47015	0.283888	5.17865	2.23503e-07	9.24843e-06	41	76	75	175	141	142	up
Ibat.Brg_v3.08AG007000	78.5558	1.02166	0.29855	3.42206	0.000621478	0.0110391	47	57	64	102	94	99	up
Ibat.Brg_v3.08AG007940	37.2196	-1.33711	0.452014	-2.95811	0.00309531	0.0403138	51	74	49	26	21	13	down
Ibat.Brg_v3.08AG007950	196.672	-1.16304	0.207411	-5.6074	2.05387e-08	9.95802e-07	287	329	265	103	144	96	down
Ibat.Brg_v3.08AG014830	172.531	2.83537	0.755629	3.75233	0.0001752	0.00378323	36	51	51	71	522	262	up
Ibat.Brg_v3.08AG015460	484.468	-3.91976	0.180975	-21.6591	4.98772e-104	3.9235e-101	849	1084	1017	61	41	66	down
Ibat.Brg_v3.08AG016480	42.5872	3.58123	0.626634	5.71502	1.09692e-08	5.53415e-07	11	6	4	35	136	53	up
Ibat.Brg_v3.08BG000300	24.9974	2.5474	0.798948	3.18845	0.0014304	0.0219398	6	12	6	24	93	8	up
Ibat.Brg_v3.08BG000900	1187.24	1.39193	0.0958773	14.5178	9.3436e-48	3.09141e-45	613	810	705	1529	1710	1586	up
Ibat.Brg_v3.08BG003650	35.2951	-1.64298	0.463726	-3.54299	0.000395613	0.00757521	43	77	55	15	16	17	down
Ibat.Brg_v3.08BG003790	133.8	-1.03977	0.262927	-3.95458	7.66698e-05	0.00186039	148	265	177	97	87	64	down
Ibat.Brg_v3.08BG005500	159.935	5.95367	0.80143	7.4288	1.09586e-13	9.54578e-12	8	0	8	329	298	260	up
Ibat.Brg_v3.08BG007130	19.9249	3.28412	1.07177	3.06421	0.00218242	0.0307968	4	4	4	97	4	4	up
Ibat.Brg_v3.08BG009430	24.8075	3.11154	0.65887	4.72253	2.32928e-06	8.03778e-05	3	11	3	34	57	35	up
Ibat.Brg_v3.08BG009530	16.7619	-2.51646	0.833578	-3.01887	0.00253719	0.0346077	12	23	58	2	7	5	down
Ibat.Brg_v3.08BG010830	104.362	-1.0687	0.272383	-3.92351	8.72696e-05	0.00207963	122	168	170	74	70	47	down
Ibat.Brg_v3.08BG018230	36.1896	6.8712	1.11263	6.17563	6.58991e-10	3.87503e-08	0	2	0	79	69	55	up
Ibat.Brg_v3.08BG018280	11.4844	3.80142	0.964288	3.9422	8.07361e-05	0.00194309	1	2	2	17	22	21	up
Ibat.Brg_v3.08CG001370	1640.1	1.07277	0.0711457	15.0785	2.24185e-51	8.34899e-49	1049	1207	1167	2089	2199	1962	up
Ibat.Brg_v3.08CG002890	69.2955	2.0276	0.557514	3.63685	0.000275993	0.00559903	28	40	21	36	224	60	up
Ibat.Brg_v3.08CG003910	47.8304	-1.45555	0.386376	-3.76718	0.0001651	0.00359636	61	84	83	22	28	22	down
Ibat.Brg_v3.08CG003960	167.956	2.85956	0.252084	11.3437	7.97076e-30	1.64296e-27	26	57	50	292	290	250	up
Ibat.Brg_v3.08CG004760	31.6412	2.70738	0.767216	3.52884	0.000417387	0.00792911	3	18	7	46	12	90	up
Ibat.Brg_v3.08CG005420	107.433	-1.91958	0.26458	-7.25519	4.01109e-13	3.32489e-11	170	193	187	40	43	43	down
Ibat.Brg_v3.08CG005600	319.115	6.47932	0.342861	18.8978	1.18881e-79	7.27346e-77	5	14	4	671	564	541	up
Ibat.Brg_v3.08CG005620	14.416	4.49746	0.990367	4.5412	5.59338e-06	0.000178105	0	2	2	24	24	29	up
Ibat.Brg_v3.08CG008750	179.288	1.24608	0.234392	5.31623	1.05939e-07	4.61926e-06	93	138	115	225	205	272	up
Ibat.Brg_v3.08CG009900	129.979	1.20823	0.251016	4.81336	1.48416e-06	5.3191e-05	60	99	97	163	176	170	up
Ibat.Brg_v3.08CG010140	34.1218	1.53257	0.493417	3.10603	0.00189619	0.0274718	26	15	15	58	53	33	up
Ibat.Brg_v3.08CG014000	117.402	-1.02711	0.254266	-4.03953	5.35576e-05	0.00135993	151	192	168	63	73	80	down
Ibat.Brg_v3.08DG000240	27.1979	-2.19849	0.730066	-3.01136	0.00260078	0.0352548	13	60	75	6	18	4	down
Ibat.Brg_v3.08DG000270	221.369	1.14169	0.184496	6.18815	6.08734e-10	3.60702e-08	128	158	162	328	290	242	up
Ibat.Brg_v3.08DG000940	56.6324	2.08862	0.508335	4.10874	3.97825e-05	0.00103961	18	8	43	81	83	92	up
Ibat.Brg_v3.08DG001380	123.376	-1.1795	0.35174	-3.35333	0.000798464	0.0136786	122	135	297	70	88	56	down
Ibat.Brg_v3.08DG001720	31.1852	1.87277	0.625855	2.99234	0.00276845	0.0370392	10	22	12	20	88	32	up
Ibat.Brg_v3.08DG002210	41.9313	-2.15471	0.72738	-2.96229	0.00305355	0.0398913	25	21	175	18	10	15	down
Ibat.Brg_v3.08DG002590	15.4194	2.26678	0.706303	3.20936	0.0013303	0.0206634	7	4	6	29	23	20	up
Ibat.Brg_v3.08DG002830	27.0296	2.05043	0.539461	3.80088	0.000144183	0.00319674	12	13	9	51	31	40	up
Ibat.Brg_v3.08DG002900	15.4119	-3.29268	1.05609	-3.11779	0.00182216	0.0266648	5	13	73	1	4	3	down
Ibat.Brg_v3.08DG003290	65.194	2.78096	0.366589	7.58603	3.29851e-14	3.02357e-12	12	22	20	120	107	94	up
Ibat.Brg_v3.08DG004760	441.172	7.38324	0.40692	18.1442	1.42737e-73	8.27337e-71	6	5	6	1128	605	734	up
Ibat.Brg_v3.08DG004790	38.6628	3.00071	0.52252	5.74277	9.31403e-09	4.74909e-07	8	14	6	71	45	75	up
Ibat.Brg_v3.08DG006170	23.8073	2.51749	0.677266	3.71714	0.000201488	0.00427662	6	8	9	70	19	26	up
Ibat.Brg_v3.08DG008310	81.5548	2.29308	0.380118	6.03256	1.61387e-09	9.11454e-08	39	16	33	130	158	96	up
Ibat.Brg_v3.08DG010270	41.067	1.45989	0.470802	3.10086	0.00192962	0.0278462	19	25	27	33	63	71	up
Ibat.Brg_v3.08DG016600	535.152	-1.9744	0.156177	-12.642	1.23803e-36	3.20268e-34	987	1000	768	219	234	161	down
Ibat.Brg_v3.08DG016780	114.857	1.31976	0.27031	4.88239	1.04808e-06	3.86772e-05	63	59	90	170	156	136	up
Ibat.Brg_v3.08DG017510	1383.72	1.70202	0.115415	14.7469	3.22126e-49	1.1086e-46	513	849	762	2115	2119	1737	up
Ibat.Brg_v3.08EG001020	1181.8	1.3397	0.0866421	15.4624	6.22293e-54	2.3867e-51	719	768	678	1633	1721	1419	up
Ibat.Brg_v3.08EG001170	871.719	-1.14529	0.101826	-11.2474	2.38401e-29	4.86198e-27	1212	1433	1248	539	578	417	down
Ibat.Brg_v3.08EG001840	429.2	1.12411	0.160228	7.01568	2.28832e-12	1.71769e-10	262	289	322	515	525	602	up
Ibat.Brg_v3.08EG002060	26.2603	2.34668	0.540213	4.34399	1.3992e-05	0.000408268	8	10	10	50	40	34	up
Ibat.Brg_v3.08EG002120	39.4141	3.0265	0.859428	3.52152	0.000429073	0.00810519	16	4	7	7	33	145	up
Ibat.Brg_v3.08EG003210	69.1268	-1.10154	0.382454	-2.88018	0.00397448	0.0489211	70	106	131	26	52	45	down
Ibat.Brg_v3.08EG003650	161.595	-1.43738	0.222005	-6.47456	9.50861e-11	6.20677e-09	229	291	247	86	100	61	down
Ibat.Brg_v3.08EG003810	24.4388	1.60424	0.543711	2.95053	0.00317227	0.041025	13	12	14	42	27	34	up
Ibat.Brg_v3.08EG004020	70.4832	1.77227	0.549519	3.22513	0.00125914	0.0197732	19	19	65	65	64	167	up
Ibat.Brg_v3.08EG004670	43.0344	1.57462	0.505394	3.11562	0.00183556	0.0268354	27	15	27	71	32	75	up
Ibat.Brg_v3.08EG005320	22.268	4.32194	0.792961	5.45039	5.02604e-08	2.3063e-06	0	5	2	42	37	40	up
Ibat.Brg_v3.08EG005330	277.328	5.87323	0.313551	18.7313	2.74883e-78	1.65552e-75	15	6	9	579	505	452	up
Ibat.Brg_v3.08EG005340	36.5806	5.01919	0.701638	7.15354	8.45669e-13	6.71397e-11	4	0	3	61	73	65	up
Ibat.Brg_v3.08EG006840	10.8942	2.78108	0.871733	3.19029	0.00142129	0.0218132	2	3	4	23	18	13	up
Ibat.Brg_v3.08EG007130	295.816	1.15839	0.188901	6.13226	8.66373e-10	5.02927e-08	207	159	222	413	408	331	up
Ibat.Brg_v3.08EG008680	39.9618	-2.86621	0.696512	-4.11509	3.87021e-05	0.00101412	73	144	15	5	12	10	down
Ibat.Brg_v3.08EG010200	243.943	1.52643	0.187715	8.13162	4.2358e-16	4.52896e-14	120	166	123	400	339	284	up
Ibat.Brg_v3.08EG012660	27.4044	2.24813	0.761198	2.9534	0.00314291	0.0407651	10	13	8	100	13	17	up
Ibat.Brg_v3.08EG012990	14.8679	-5.30015	1.46642	-3.61435	0.000301098	0.00603997	4	9	81	0	0	2	down
Ibat.Brg_v3.08EG016260	214.55	-3.17436	0.277588	-11.4355	2.77883e-30	5.86904e-28	400	496	357	22	44	53	down
Ibat.Brg_v3.08EG016270	669.403	-3.69679	0.141529	-26.1204	2.1404e-150	2.46274e-147	1292	1456	1276	78	111	81	down
Ibat.Brg_v3.08FG001120	40.7797	1.36259	0.421275	3.23445	0.00121878	0.0192453	19	23	32	60	53	52	up
Ibat.Brg_v3.08FG001520	1379.17	1.18723	0.0798038	14.8769	4.65661e-50	1.65428e-47	876	943	904	1915	1941	1551	up
Ibat.Brg_v3.08FG003280	106.046	-1.8478	0.436167	-4.23646	2.27071e-05	0.000627867	57	230	262	45	38	46	down
Ibat.Brg_v3.08FG005400	78.0776	-2.02375	0.52023	-3.89011	0.000100199	0.00234166	253	65	72	27	36	24	down
Ibat.Brg_v3.08FG005720	62.1558	1.24996	0.352965	3.54132	0.000398132	0.00761399	29	46	45	104	81	63	up
Ibat.Brg_v3.08FG006490	14.0199	6.38343	1.4052	4.5427	5.55372e-06	0.000176989	0	1	0	12	40	26	up
Ibat.Brg_v3.08FG006970	723.514	1.07363	0.116613	9.20678	3.36059e-20	4.55304e-18	422	569	524	1057	907	802	up
Ibat.Brg_v3.08FG008140	60.3337	1.41043	0.364296	3.87166	0.000108097	0.00249523	26	49	33	103	78	67	up
Ibat.Brg_v3.08FG008750	159.995	-1.56006	0.352791	-4.42205	9.7767e-06	0.00029626	207	290	281	139	49	43	down
Ibat.Brg_v3.08FG008980	80.2742	1.40375	0.412394	3.4039	0.000664311	0.0116709	38	47	58	88	190	57	up
Ibat.Brg_v3.08FG009110	150.402	1.37155	0.410389	3.34207	0.000831549	0.0141667	112	101	57	343	209	74	up
Ibat.Brg_v3.08FG009670	46.6855	3.05769	0.731879	4.17787	2.94256e-05	0.000792323	6	16	11	140	97	7	up
Ibat.Brg_v3.08FG014590	6.09625	-5.95865	1.79912	-3.31198	0.000926391	0.0154445	9	31	1	0	0	0	down
Ibat.Brg_v3.08FG020450	43.8974	1.64096	0.433516	3.78524	0.000153563	0.0033775	14	32	24	76	68	45	up
Ibat.Brg_v3.08FG021360	225.434	-2.74522	0.264206	-10.3904	2.74062e-25	4.71595e-23	306	576	404	40	55	68	down
Ibat.Brg_v3.08FG021600	31.7076	-3.44954	0.57434	-6.00609	1.90051e-09	1.06553e-07	52	71	66	7	4	4	down
Ibat.Brg_v3.08FG022570	35.3619	1.71775	0.4615	3.7221	0.000197571	0.00420622	19	14	20	46	63	44	up
Ibat.Brg_v3.08FG022820	261.115	1.60923	0.183057	8.79091	1.48355e-18	1.82404e-16	124	134	159	421	346	339	up
Ibat.Brg_v3.08FG022950	35.323	1.6754	0.527844	3.17403	0.00150337	0.0228769	19	11	24	48	77	29	up
Ibat.Brg_v3.09AG000900	196.645	-1.07598	0.196623	-5.47229	4.44265e-08	2.05203e-06	239	349	281	116	128	112	down
Ibat.Brg_v3.09AG000920	45.3548	-1.29881	0.43627	-2.97707	0.00291022	0.0384554	58	92	61	28	34	13	down
Ibat.Brg_v3.09AG001220	50.9759	-2.301	0.550387	-4.1807	2.90616e-05	0.00078389	68	74	132	27	4	17	down
Ibat.Brg_v3.09AG002100	78.7993	1.58188	0.422641	3.74285	0.000181943	0.0039135	58	51	18	129	138	70	up
Ibat.Brg_v3.09AG002200	1275.81	1.01882	0.0840732	12.1182	8.45845e-34	2.0108e-31	890	980	859	1726	1707	1386	up
Ibat.Brg_v3.09AG002790	27.4845	-2.56915	0.772796	-3.32449	0.000885818	0.0149295	22	32	99	8	14	1	down
Ibat.Brg_v3.09AG003960	14.9227	2.96381	0.80088	3.70069	0.000215012	0.00452506	2	3	6	33	16	25	up
Ibat.Brg_v3.09AG004420	135.227	-1.38497	0.234071	-5.91689	3.28095e-09	1.77743e-07	189	230	215	62	76	72	down
Ibat.Brg_v3.09AG005970	42.4915	-1.25161	0.421763	-2.96757	0.00300165	0.0393801	52	66	76	22	20	28	down
Ibat.Brg_v3.09AG006010	127.499	-1.41804	0.249948	-5.67334	1.4004e-08	6.95601e-07	175	209	217	64	58	72	down
Ibat.Brg_v3.09AG006320	10.5098	-2.89802	0.932484	-3.10785	0.00188451	0.0273385	24	13	22	2	3	2	down
Ibat.Brg_v3.09AG007290	10.0329	3.61551	1.10385	3.27535	0.00105531	0.0172187	1	4	0	10	16	25	up
Ibat.Brg_v3.09AG007400	8.13584	-6.3761	1.75651	-3.62999	0.000283436	0.00572596	4	50	2	0	0	0	down
Ibat.Brg_v3.09AG008160	11.982	3.64633	1.10553	3.29825	0.000972884	0.0161151	0	6	0	25	29	10	up
Ibat.Brg_v3.09AG008660	10.398	3.32607	1.03461	3.21479	0.00130538	0.02038	2	0	4	14	14	24	up
Ibat.Brg_v3.09AG010680	37.7102	1.452	0.445041	3.26262	0.00110387	0.0178214	17	29	20	64	56	37	up
Ibat.Brg_v3.09AG010990	194.527	-1.03456	0.208737	-4.95628	7.18541e-07	2.73678e-05	235	308	306	138	102	118	down
Ibat.Brg_v3.09AG011010	106.52	3.41674	0.332415	10.2786	8.80369e-25	1.47218e-22	23	24	12	215	160	172	up
Ibat.Brg_v3.09AG012700	100.563	1.03978	0.275891	3.7688	0.000164032	0.00357614	70	62	80	114	144	122	up
Ibat.Brg_v3.09AG014130	48.3515	-1.1977	0.397247	-3.01499	0.00256986	0.034934	72	65	80	37	25	21	down
Ibat.Brg_v3.09AG016310	516.152	2.34554	0.129871	18.0604	6.52925e-73	3.70103e-70	160	188	202	866	856	710	up
Ibat.Brg_v3.09AG017060	74.4372	1.28354	0.34058	3.7687	0.000164098	0.00357656	30	60	52	125	97	77	up
Ibat.Brg_v3.09AG018000	78.3536	1.16481	0.31573	3.68925	0.000224918	0.00471039	35	64	59	117	102	87	up
Ibat.Brg_v3.09AG019830	403.991	2.32456	0.151242	15.3698	2.60801e-53	9.85546e-51	151	146	137	624	638	626	up
Ibat.Brg_v3.09AG021520	35.1218	1.68265	0.48586	3.46324	0.000533721	0.00973375	11	29	15	55	58	39	up
Ibat.Brg_v3.09AG027630	25.3342	-3.09262	0.618497	-5.00021	5.72681e-07	2.21182e-05	46	40	60	5	6	4	down
Ibat.Brg_v3.09AG029730	81.6603	-1.22175	0.290239	-4.20946	2.55986e-05	0.000701527	115	143	113	46	50	42	down
Ibat.Brg_v3.09AG029780	49.5948	2.11978	0.410118	5.1687	2.35727e-07	9.70735e-06	22	22	16	73	100	56	up
Ibat.Brg_v3.09AG029840	38.8184	1.78366	0.468911	3.80384	0.000142469	0.00316786	16	27	14	54	45	68	up
Ibat.Brg_v3.09AG030100	540.113	-1.11208	0.126716	-8.77616	1.69145e-18	2.07633e-16	698	867	831	293	356	311	down
Ibat.Brg_v3.09AG030590	19.4466	2.52699	0.86422	2.92402	0.00345545	0.043892	11	2	5	35	7	48	up
Ibat.Brg_v3.09AG030640	88.9892	1.49446	0.292952	5.10138	3.37187e-07	1.35243e-05	38	63	51	124	118	126	up
Ibat.Brg_v3.09AG031120	95.7307	1.33475	0.274579	4.86109	1.16743e-06	4.27744e-05	53	58	65	136	149	103	up
Ibat.Brg_v3.09AG031130	185.426	1.311	0.205274	6.38659	1.69627e-10	1.06141e-08	88	136	123	263	245	235	up
Ibat.Brg_v3.09AG031300	144.87	1.23463	0.239378	5.15765	2.50072e-07	1.02707e-05	70	103	108	184	186	199	up
Ibat.Brg_v3.09AG031830	32.997	1.45853	0.49231	2.96262	0.00305036	0.0398563	10	28	20	53	47	37	up
Ibat.Brg_v3.09BG000590	47.0725	-3.75381	0.819243	-4.58205	4.60443e-06	0.000149392	194	71	8	6	4	8	down
Ibat.Brg_v3.09BG001270	78.6113	-1.22933	0.327919	-3.74889	0.000177617	0.00383113	96	109	152	54	45	34	down
Ibat.Brg_v3.09BG001440	28.3987	1.78289	0.569776	3.12911	0.00175337	0.0258643	8	20	14	56	24	43	up
Ibat.Brg_v3.09BG001660	24.1899	1.74421	0.555011	3.14265	0.00167426	0.024912	13	15	8	32	34	38	up
Ibat.Brg_v3.09BG002650	37.7646	-1.39546	0.455355	-3.06455	0.00217994	0.030773	45	75	59	16	28	15	down
Ibat.Brg_v3.09BG003130	35.954	-2.61291	0.712751	-3.66595	0.000246423	0.00509296	66	16	114	8	17	4	down
Ibat.Brg_v3.09BG003330	17.5784	2.04424	0.695199	2.94051	0.00327676	0.0420589	10	8	4	22	21	35	up
Ibat.Brg_v3.09BG004270	17.1196	-3.88122	0.90293	-4.29847	1.71978e-05	0.000491577	37	47	20	0	2	4	down
Ibat.Brg_v3.09BG005490	85.5903	1.0698	0.331013	3.23191	0.00122968	0.0193896	50	44	84	121	105	100	up
Ibat.Brg_v3.09BG005510	21.914	-1.63811	0.563261	-2.90827	0.00363435	0.0456306	36	35	36	10	11	9	down
Ibat.Brg_v3.09BG005600	352.772	1.04846	0.168088	6.23754	4.44502e-10	2.67964e-08	208	249	288	478	404	450	up
Ibat.Brg_v3.09BG005830	197.438	1.49739	0.190304	7.86838	3.5925e-15	3.54604e-13	96	119	120	272	299	250	up
Ibat.Brg_v3.09BG005910	30.1656	-2.29726	0.652043	-3.52317	0.000426416	0.00806724	30	29	103	12	11	6	down
Ibat.Brg_v3.09BG005960	32.9074	2.55912	0.584066	4.38155	1.17839e-05	0.000350686	11	14	6	82	28	48	up
Ibat.Brg_v3.09BG006010	68.9891	-1.03449	0.322054	-3.21217	0.00131735	0.0205103	102	110	88	42	52	34	down
Ibat.Brg_v3.09BG006030	835.561	-1.57824	0.107065	-14.741	3.51792e-49	1.20532e-46	1262	1497	1298	362	426	389	down
Ibat.Brg_v3.09BG007580	419.596	1.81659	0.13738	13.2231	6.45057e-40	1.76338e-37	189	220	192	629	607	598	up
Ibat.Brg_v3.09BG007640	1530.4	1.02238	0.0843687	12.118	8.47724e-34	2.0108e-31	920	1205	1155	2116	1958	1706	up
Ibat.Brg_v3.09BG007670	21.1541	5.05664	0.921502	5.48738	4.07933e-08	1.89443e-06	2	2	0	43	48	26	up
Ibat.Brg_v3.09BG007740	2767.91	1.28736	0.0625351	20.5862	3.65018e-94	2.4902e-91	1633	1918	1662	3722	3791	3518	up
Ibat.Brg_v3.09BG008000	6.87393	6.33312	1.58742	3.98956	6.61949e-05	0.00164241	0	0	0	22	8	9	up
Ibat.Brg_v3.09BG008060	250.476	3.85067	0.248472	15.4974	3.61237e-54	1.39239e-51	30	55	21	442	451	423	up
Ibat.Brg_v3.09BG008100	1720.17	1.31167	0.0818428	16.0267	8.32308e-58	3.50615e-55	894	1251	1069	2467	2364	2076	up
Ibat.Brg_v3.09BG008120	133.755	1.03239	0.250173	4.12672	3.6797e-05	0.0009708	96	89	98	185	141	176	up
Ibat.Brg_v3.09BG009580	16.9697	3.12967	0.84462	3.70542	0.000211041	0.00444635	8	3	0	27	28	30	up
Ibat.Brg_v3.09BG009710	63.2237	1.01723	0.344735	2.95078	0.00316977	0.0410064	51	50	34	78	94	67	up
Ibat.Brg_v3.09BG009990	141.475	1.08455	0.225543	4.80864	1.51963e-06	5.42841e-05	84	116	95	192	205	147	up
Ibat.Brg_v3.09BG010450	16.5847	-1.95765	0.666185	-2.93859	0.00329704	0.0422698	29	28	28	5	7	7	down
Ibat.Brg_v3.09BG011480	13.6378	-4.23316	1.45052	-2.91837	0.00351861	0.0445255	2	4	78	0	4	0	down
Ibat.Brg_v3.09BG011990	65.6729	2.26859	0.344264	6.58967	4.40802e-11	2.98607e-09	22	23	28	114	99	93	up
Ibat.Brg_v3.09BG013400	112.428	-1.21935	0.259444	-4.69986	2.60346e-06	8.88448e-05	131	189	192	65	65	60	down
Ibat.Brg_v3.09BG014050	19.3663	2.31472	0.789418	2.93218	0.00336586	0.0429736	2	3	16	38	20	32	up
Ibat.Brg_v3.09BG014720	113.699	1.21847	0.27215	4.47719	7.56334e-06	0.00023416	57	77	88	179	129	139	up
Ibat.Brg_v3.09BG017300	283.072	2.45562	0.172579	14.229	6.05492e-46	1.88215e-43	91	109	83	449	488	411	up
Ibat.Brg_v3.09BG017320	12.4744	3.90578	0.982377	3.97585	7.01275e-05	0.00172398	2	1	2	16	16	32	up
Ibat.Brg_v3.09BG019520	35.2711	1.34521	0.464335	2.89707	0.00376665	0.0469324	17	29	19	38	48	55	up
Ibat.Brg_v3.09BG025730	79.5718	-1.4071	0.367048	-3.83356	0.0001263	0.00285108	150	151	72	46	43	34	down
Ibat.Brg_v3.09BG026470	26.641	-2.79425	0.605631	-4.61378	3.95411e-06	0.000130155	55	50	45	11	4	4	down
Ibat.Brg_v3.09BG029170	66.0969	-1.5994	0.352512	-4.53717	5.70154e-06	0.000181101	91	94	136	29	32	31	down
Ibat.Brg_v3.09BG030410	12.0541	-2.8754	0.896912	-3.20589	0.00134644	0.0208722	21	16	31	3	1	4	down
Ibat.Brg_v3.09BG030490	168.397	1.62994	0.206656	7.88723	3.08957e-15	3.08117e-13	76	100	91	247	239	229	up
Ibat.Brg_v3.09BG031210	18.8961	2.26308	0.654964	3.45528	0.000549723	0.00997838	9	8	4	37	25	26	up
Ibat.Brg_v3.09BG031240	12.0994	7.14875	1.6167	4.4218	9.78801e-06	0.000296486	0	0	0	55	2	12	up
Ibat.Brg_v3.09CG000170	252.451	1.04284	0.187702	5.5558	2.7635e-08	1.31505e-06	201	173	157	346	342	271	up
Ibat.Brg_v3.09CG001390	303.681	2.06788	0.171881	12.0309	2.44532e-33	5.69517e-31	103	160	118	481	458	439	up
Ibat.Brg_v3.09CG001480	38.7787	2.52404	0.830545	3.03901	0.00237356	0.0328447	6	19	13	165	18	9	up
Ibat.Brg_v3.09CG001500	24.6053	-1.77622	0.582769	-3.04789	0.00230452	0.0321665	34	50	40	14	5	12	down
Ibat.Brg_v3.09CG001590	14.9757	2.80737	0.751114	3.73761	0.000185774	0.00398368	5	3	4	24	22	27	up
Ibat.Brg_v3.09CG002750	67.2447	1.23813	0.35249	3.51253	0.000443857	0.00832528	43	55	32	70	106	89	up
Ibat.Brg_v3.09CG004220	148.733	-2.09169	0.263597	-7.93519	2.10174e-15	2.12351e-13	181	326	282	62	57	41	down
Ibat.Brg_v3.09CG004260	125.648	-1.44713	0.260465	-5.55593	2.76134e-08	1.31483e-06	189	190	214	56	59	73	down
Ibat.Brg_v3.09CG004830	35.5395	2.3012	0.500519	4.59763	4.27331e-06	0.000139471	8	12	19	69	60	39	up
Ibat.Brg_v3.09CG005450	28.6289	-1.50892	0.500859	-3.01266	0.00258968	0.0351476	34	50	54	16	14	12	down
Ibat.Brg_v3.09CG006180	1468.25	1.21525	0.0742071	16.3764	2.81912e-60	1.25622e-57	863	1045	959	2018	2083	1687	up
Ibat.Brg_v3.09CG006240	221.811	1.01822	0.203424	5.00541	5.57431e-07	2.15616e-05	119	191	168	259	279	293	up
Ibat.Brg_v3.09CG006800	128.418	1.66374	0.26136	6.36569	1.94412e-10	1.21452e-08	59	61	79	187	162	196	up
Ibat.Brg_v3.09CG008870	25.6654	-2.07785	0.605941	-3.42913	0.000605527	0.0108081	32	50	53	6	6	15	down
Ibat.Brg_v3.09CG009900	38.5698	-1.38083	0.432567	-3.19217	0.00141208	0.0217036	68	57	54	20	20	20	down
Ibat.Brg_v3.09CG011690	812.401	1.01429	0.101818	9.9618	2.23964e-23	3.5021e-21	554	653	537	1119	1046	898	up
Ibat.Brg_v3.09CG013170	168.238	-1.00914	0.226893	-4.44763	8.68241e-06	0.000265922	204	271	255	112	86	114	down
Ibat.Brg_v3.09CG013710	111.267	2.97595	0.305089	9.75439	1.76659e-22	2.62402e-20	16	35	31	213	175	168	up
Ibat.Brg_v3.09CG013860	46.7265	-1.24605	0.407405	-3.05851	0.00222437	0.0312629	74	76	62	24	21	32	down
Ibat.Brg_v3.09CG014480	200.115	1.67102	0.235326	7.10089	1.23959e-12	9.70153e-11	98	81	129	338	300	224	up
Ibat.Brg_v3.09CG015810	100.779	1.26389	0.276274	4.57478	4.76715e-06	0.000154347	52	75	66	150	155	99	up
Ibat.Brg_v3.09CG015860	60.6826	-1.00905	0.340869	-2.96023	0.00307406	0.0401168	82	83	97	43	42	29	down
Ibat.Brg_v3.09CG016280	30.3606	-1.68094	0.516267	-3.25596	0.0011301	0.0181612	34	53	64	18	14	9	down
Ibat.Brg_v3.09CG017000	15.7734	2.94037	0.991182	2.96653	0.00301181	0.0394753	2	6	4	12	66	4	up
Ibat.Brg_v3.09CG017110	40.9339	1.45888	0.454761	3.20802	0.00133652	0.0207476	15	39	18	58	58	53	up
Ibat.Brg_v3.09CG017320	243.46	2.21827	0.185339	11.9688	5.17944e-33	1.19905e-30	76	107	97	424	376	330	up
Ibat.Brg_v3.09CG017370	6.17564	6.17848	1.58697	3.89325	9.89107e-05	0.00231553	0	0	0	13	13	9	up
Ibat.Brg_v3.09CG026230	49.1056	-1.36946	0.378783	-3.61543	0.00029985	0.00602241	75	82	72	22	30	25	down
Ibat.Brg_v3.09CG026850	48.3598	-3.66511	0.506337	-7.23849	4.53718e-13	3.72097e-11	65	124	105	5	10	5	down
Ibat.Brg_v3.09CG029910	220.845	-1.17194	0.206605	-5.67239	1.40818e-08	6.98192e-07	303	330	356	147	102	131	down
Ibat.Brg_v3.09CG031160	63.1386	2.1465	0.520677	4.12253	3.7474e-05	0.000986972	8	53	17	108	70	109	up
Ibat.Brg_v3.09DG000850	14.7194	-2.281	0.755416	-3.01953	0.00253166	0.0345487	15	32	33	4	4	6	down
Ibat.Brg_v3.09DG001580	679.323	-1.51025	0.126893	-11.9017	1.15917e-32	2.65953e-30	923	1175	1168	392	341	265	down
Ibat.Brg_v3.09DG002140	148.092	1.13036	0.225299	5.01717	5.24395e-07	2.03861e-05	84	117	101	221	176	175	up
Ibat.Brg_v3.09DG002930	208.479	2.55004	0.224172	11.3754	5.54712e-30	1.15264e-27	60	72	65	275	360	360	up
Ibat.Brg_v3.09DG004090	342.264	-1.33573	0.157229	-8.49542	1.97225e-17	2.27947e-15	438	577	578	205	178	164	down
Ibat.Brg_v3.09DG005750	299.502	1.23061	0.197894	6.21854	5.01801e-10	3.01042e-08	173	175	230	467	331	380	up
Ibat.Brg_v3.09DG006000	116.304	1.47874	0.282713	5.23053	1.69027e-07	7.11647e-06	60	73	66	180	120	177	up
Ibat.Brg_v3.09DG006200	1509.47	-1.50178	0.0906162	-16.573	1.09305e-61	4.986e-59	2025	2611	2610	723	825	671	down
Ibat.Brg_v3.09DG006600	12.7385	2.71392	0.810845	3.34702	0.000816844	0.0139408	2	4	5	24	25	14	up
Ibat.Brg_v3.09DG006980	70.108	-1.15266	0.347999	-3.31224	0.000925506	0.0154331	117	89	104	31	50	41	down
Ibat.Brg_v3.09DG007060	421.525	1.1498	0.148362	7.74999	9.18972e-15	8.78952e-13	263	321	265	516	535	574	up
Ibat.Brg_v3.09DG007700	321.253	1.13567	0.1758	6.46002	1.04691e-10	6.77633e-09	199	263	191	488	367	386	up
Ibat.Brg_v3.09DG008010	61.8093	1.86871	0.33935	5.50673	3.65564e-08	1.70589e-06	28	30	28	97	100	77	up
Ibat.Brg_v3.09DG008220	696.387	1.31531	0.10408	12.6374	1.31252e-36	3.37273e-34	383	491	422	972	959	864	up
Ibat.Brg_v3.09DG009260	33.7596	1.72576	0.584308	2.95351	0.00314185	0.0407616	13	18	20	93	28	27	up
Ibat.Brg_v3.09DG010580	191.251	-1.11684	0.199709	-5.59235	2.24014e-08	1.07865e-06	267	301	279	120	101	117	down
Ibat.Brg_v3.09DG010850	11.1554	5.16039	1.3192	3.91177	9.16225e-05	0.00216945	0	2	0	22	12	26	up
Ibat.Brg_v3.09DG011860	17.5712	2.06614	0.647256	3.19215	0.00141218	0.0217036	6	8	8	22	34	24	up
Ibat.Brg_v3.09DG013230	67.7109	1.10253	0.352464	3.12807	0.0017596	0.0259215	43	41	55	111	95	57	up
Ibat.Brg_v3.09DG013680	13.0523	2.87236	0.979038	2.93386	0.00334777	0.0427993	4	2	4	4	20	38	up
Ibat.Brg_v3.09DG014190	149.694	1.04086	0.238679	4.36093	1.29511e-05	0.00038107	94	90	132	204	192	171	up
Ibat.Brg_v3.09DG015490	91.3538	1.08327	0.358598	3.02085	0.0025207	0.0344187	43	74	74	96	88	158	up
Ibat.Brg_v3.09DG016190	13.335	4.77521	1.09282	4.36962	1.24462e-05	0.000367898	2	0	1	22	33	18	up
Ibat.Brg_v3.09DG016870	50.2984	-2.18324	0.660771	-3.30409	0.000952862	0.0158516	12	138	126	20	23	9	down
Ibat.Brg_v3.09DG016910	33.551	1.91623	0.495611	3.86639	0.000110457	0.00254032	8	18	20	61	48	41	up
Ibat.Brg_v3.09DG027440	39.0879	1.30531	0.428528	3.04603	0.00231888	0.0323084	23	27	23	68	45	44	up
Ibat.Brg_v3.09DG027450	152.001	2.20673	0.251495	8.77444	1.71755e-18	2.10502e-16	41	60	75	269	234	202	up
Ibat.Brg_v3.09DG027490	27.5512	-2.9105	0.637315	-4.56681	4.95203e-06	0.000160064	27	55	77	6	4	8	down
Ibat.Brg_v3.09DG030210	274.095	1.10673	0.180025	6.14766	7.86336e-10	4.57845e-08	194	219	150	364	387	305	up
Ibat.Brg_v3.09DG030400	21.4741	2.48217	0.664342	3.73628	0.000186765	0.00399957	10	9	2	38	30	34	up
Ibat.Brg_v3.09DG030710	40.9273	1.53216	0.4932	3.10657	0.00189269	0.0274314	34	21	12	49	54	66	up
Ibat.Brg_v3.09DG031370	67.0559	-1.37164	0.379812	-3.61137	0.000304585	0.00609723	87	101	125	42	21	41	down
Ibat.Brg_v3.09DG031450	470.957	1.66484	0.145289	11.4588	2.12347e-30	4.53459e-28	226	254	251	776	601	634	up
Ibat.Brg_v3.09DG031910	176.957	1.52374	0.198811	7.6643	1.79814e-14	1.68023e-12	89	107	100	261	245	232	up
Ibat.Brg_v3.09EG000810	67.4164	-1.00955	0.332275	-3.0383	0.00237917	0.0328964	91	118	84	47	50	30	down
Ibat.Brg_v3.09EG001450	289.229	-1.66484	0.17919	-9.29092	1.52959e-20	2.09443e-18	393	573	467	118	156	117	down
Ibat.Brg_v3.09EG002130	62.2843	-1.19172	0.343697	-3.46735	0.000525623	0.00961051	93	111	77	33	43	31	down
Ibat.Brg_v3.09EG002270	38.368	2.41544	0.462202	5.22594	1.73276e-07	7.27552e-06	16	13	10	71	58	53	up
Ibat.Brg_v3.09EG003220	120.159	1.09724	0.28032	3.91424	9.06892e-05	0.0021485	79	61	106	147	167	146	up
Ibat.Brg_v3.09EG003980	49.3504	-1.81657	0.542202	-3.35036	0.000807067	0.0138014	114	72	59	40	10	12	down
Ibat.Brg_v3.09EG004870	58.5831	-1.25638	0.420684	-2.98651	0.00282182	0.0375706	83	69	114	38	45	16	down
Ibat.Brg_v3.09EG004890	42.2413	1.78178	0.449207	3.9665	7.29351e-05	0.00178324	15	22	25	78	72	37	up
Ibat.Brg_v3.09EG005350	4744.35	2.84108	0.257781	11.0213	3.01673e-28	5.91755e-26	809	1752	1261	7517	8989	6967	up
Ibat.Brg_v3.09EG005360	20.5206	5.44333	1.00634	5.40905	6.3361e-08	2.86313e-06	0	1	2	41	38	34	up
Ibat.Brg_v3.09EG005920	184.322	1.16703	0.198593	5.87651	4.19008e-09	2.2323e-07	106	126	136	232	251	233	up
Ibat.Brg_v3.09EG006310	6.90551	5.34756	1.60645	3.32881	0.000872183	0.0147546	0	0	1	6	27	6	up
Ibat.Brg_v3.09EG006500	99.0113	-1.01295	0.320719	-3.15838	0.00158648	0.0238961	139	180	111	73	42	68	down
Ibat.Brg_v3.09EG006520	1213.64	1.18461	0.0902359	13.1279	2.27959e-39	6.14452e-37	804	847	746	1563	1663	1509	up
Ibat.Brg_v3.09EG006580	147.27	1.57076	0.240581	6.52904	6.61929e-11	4.40277e-09	74	99	68	179	231	208	up
Ibat.Brg_v3.09EG006670	23.6643	6.22449	1.15495	5.38939	7.06989e-08	3.17055e-06	2	0	0	39	42	49	up
Ibat.Brg_v3.09EG006740	909.108	1.66857	0.102594	16.2638	1.78235e-59	7.85151e-57	396	556	463	1385	1304	1202	up
Ibat.Brg_v3.09EG007060	34.6576	1.45849	0.481371	3.02986	0.00244664	0.0336265	14	19	27	56	36	50	up
Ibat.Brg_v3.09EG007090	925.755	1.93362	0.112156	17.2405	1.32001e-66	6.60778e-64	421	435	385	1425	1310	1376	up
Ibat.Brg_v3.09EG007130	194.665	1.06624	0.199828	5.33581	9.51183e-08	4.1734e-06	122	148	138	291	223	227	up
Ibat.Brg_v3.09EG007140	1472.18	1.3134	0.0839667	15.6419	3.77224e-55	1.48368e-52	788	1081	878	2054	2029	1824	up
Ibat.Brg_v3.09EG007160	81.3904	1.53072	0.449466	3.40565	0.000660078	0.0116097	21	46	70	187	90	68	up
Ibat.Brg_v3.09EG009420	52.7301	-1.5229	0.4214	-3.6139	0.000301626	0.00604792	68	104	83	34	14	28	down
Ibat.Brg_v3.09EG009510	33.3962	1.55549	0.500454	3.10815	0.00188262	0.0273265	20	25	10	40	47	52	up
Ibat.Brg_v3.09EG009680	38.7927	5.36206	0.757991	7.07404	1.50483e-12	1.16008e-10	2	4	0	100	49	64	up
Ibat.Brg_v3.09EG010420	97.4053	1.01242	0.312326	3.24156	0.00118878	0.0188683	73	85	51	105	113	144	up
Ibat.Brg_v3.09EG011710	125.292	2.80008	0.29032	9.6448	5.17102e-22	7.49313e-20	35	41	26	177	265	177	up
Ibat.Brg_v3.09EG012160	18.6052	2.24148	0.683581	3.27903	0.00104166	0.0170513	8	8	5	46	20	21	up
Ibat.Brg_v3.09EG012340	418.115	2.67308	0.148955	17.9455	5.20556e-72	2.90795e-69	109	121	137	740	712	587	up
Ibat.Brg_v3.09EG013550	133.386	-1.02016	0.24004	-4.24996	2.13805e-05	0.000595241	154	222	206	80	100	69	down
Ibat.Brg_v3.09EG014040	50.4398	1.99672	0.423672	4.71289	2.44226e-06	8.37889e-05	28	22	15	72	101	56	up
Ibat.Brg_v3.09EG014090	95.9714	-1.07659	0.278437	-3.86656	0.000110382	0.00253934	119	159	145	65	49	59	down
Ibat.Brg_v3.09EG014440	161.814	-1.433	0.400247	-3.58029	0.000343208	0.00673141	159	301	313	129	29	86	down
Ibat.Brg_v3.09EG014790	56.4771	1.63553	0.461959	3.54042	0.000399491	0.00763475	30	32	27	43	139	61	up
Ibat.Brg_v3.09EG015080	65.6964	1.62108	0.368388	4.40047	1.08016e-05	0.000324257	20	51	35	86	104	89	up
Ibat.Brg_v3.09EG015580	92.693	2.74929	0.320181	8.58667	8.95252e-18	1.04886e-15	18	28	32	148	142	161	up
Ibat.Brg_v3.09EG015840	39.2347	-2.26437	0.474954	-4.76756	1.86474e-06	6.5196e-05	63	54	92	12	14	12	down
Ibat.Brg_v3.09EG016430	555.101	1.27859	0.122283	10.4559	1.37633e-25	2.4224e-23	295	384	373	717	786	706	up
Ibat.Brg_v3.09EG017130	111.277	-1.70147	0.297288	-5.7233	1.04473e-08	5.28466e-07	167	208	177	59	32	55	down
Ibat.Brg_v3.09EG017750	63.7472	-1.13527	0.329862	-3.44164	0.000578206	0.0104437	89	107	88	33	42	37	down
Ibat.Brg_v3.09EG018200	94.5342	-1.11501	0.319867	-3.48586	0.000490564	0.00906461	161	117	136	41	66	60	down
Ibat.Brg_v3.09EG018630	71.3607	1.26086	0.326996	3.85588	0.000115315	0.00263781	34	55	48	112	82	89	up
Ibat.Brg_v3.09EG018900	2809.53	1.33981	0.0626476	21.3865	1.78622e-101	1.33689e-98	1556	1941	1666	3771	3967	3582	up
Ibat.Brg_v3.09EG020620	194.53	2.12316	0.235927	8.99924	2.27286e-19	2.91538e-17	54	78	104	297	293	297	up
Ibat.Brg_v3.09EG026080	35.235	-1.58687	0.459023	-3.45705	0.000546123	0.00992237	55	63	53	15	14	20	down
Ibat.Brg_v3.09EG026810	108.854	-1.84399	0.289147	-6.37733	1.80207e-10	1.1267e-08	132	242	184	51	46	37	down
Ibat.Brg_v3.09EG027870	9.22756	3.17918	1.10395	2.87983	0.00397895	0.0489547	1	3	2	15	4	26	up
Ibat.Brg_v3.09EG028610	10.7602	2.97302	0.95949	3.09854	0.00194474	0.0280225	0	3	5	20	19	15	up
Ibat.Brg_v3.09EG029310	40.4031	1.61723	0.536739	3.01307	0.00258622	0.0351192	30	28	6	56	67	49	up
Ibat.Brg_v3.09EG030660	62.746	-1.20115	0.391369	-3.06909	0.00214713	0.0304045	87	114	83	46	20	40	down
Ibat.Brg_v3.09EG030720	152.056	1.20611	0.414993	2.90634	0.00365678	0.0458451	67	129	105	103	130	341	up
Ibat.Brg_v3.09FG000980	51.3261	1.75951	0.459647	3.82795	0.000129214	0.00290835	11	32	34	101	77	48	up
Ibat.Brg_v3.09FG001140	9.98748	-4.75424	1.38888	-3.42307	0.000619192	0.0110086	9	47	9	0	1	1	down
Ibat.Brg_v3.09FG001940	79.1882	-1.48687	0.311579	-4.77206	1.82349e-06	6.39512e-05	122	149	108	43	46	29	down
Ibat.Brg_v3.09FG002670	441.649	-1.11808	0.13859	-8.06753	7.17366e-16	7.55488e-14	595	734	634	268	310	210	down
Ibat.Brg_v3.09FG003160	62.0768	2.44104	0.420071	5.81102	6.20926e-09	3.24743e-07	21	16	25	81	78	130	up
Ibat.Brg_v3.09FG004180	1126.91	1.06036	0.0875125	12.1166	8.62251e-34	2.03898e-31	765	782	813	1473	1518	1297	up
Ibat.Brg_v3.09FG004430	841.462	-1.22293	0.129704	-9.42859	4.15646e-21	5.85779e-19	1011	1573	1262	538	511	379	down
Ibat.Brg_v3.09FG005060	55.9452	1.15308	0.365091	3.15833	0.00158677	0.0238961	33	48	32	60	87	70	up
Ibat.Brg_v3.09FG005770	84.0281	-1.19885	0.360704	-3.32364	0.000888516	0.0149619	95	113	171	32	53	57	down
Ibat.Brg_v3.09FG005910	433.981	1.2195	0.156943	7.77036	7.82625e-15	7.53215e-13	239	331	278	678	501	528	up
Ibat.Brg_v3.09FG006110	129.094	1.55383	0.267636	5.80575	6.40797e-09	3.34229e-07	72	75	65	230	144	167	up
Ibat.Brg_v3.09FG008030	8.90497	6.70509	1.47107	4.55797	5.16493e-06	0.00016611	0	0	0	18	16	16	up
Ibat.Brg_v3.09FG008420	379.055	2.55145	0.147467	17.3018	4.55658e-67	2.29586e-64	111	130	117	656	623	545	up
Ibat.Brg_v3.09FG008470	80.9838	1.19626	0.308581	3.87663	0.000105913	0.00244968	45	47	67	103	107	106	up
Ibat.Brg_v3.09FG008480	1990.17	1.73205	0.0675127	25.6552	3.70029e-145	4.19493e-142	947	1019	1013	2938	3040	2631	up
Ibat.Brg_v3.09FG008500	46.801	1.15944	0.402768	2.87868	0.00399346	0.0490998	31	24	38	53	66	62	up
Ibat.Brg_v3.09FG009050	71.5358	-1.01018	0.329195	-3.06864	0.00215032	0.030433	91	119	101	57	49	29	down
Ibat.Brg_v3.09FG010000	10.3414	-6.71824	1.43665	-4.67633	2.92051e-06	9.84875e-05	18	21	28	0	0	0	down
Ibat.Brg_v3.09FG013890	41.4967	-1.51336	0.416062	-3.63734	0.00027547	0.0055943	63	69	67	20	26	15	down
Ibat.Brg_v3.09FG014220	37.0916	3.40459	0.841636	4.0452	5.22776e-05	0.00132962	2	7	12	162	18	16	up
Ibat.Brg_v3.09FG016140	50.0566	2.01209	0.68302	2.94587	0.0032205	0.0414861	23	22	19	20	30	162	up
Ibat.Brg_v3.09FG016150	15.7166	-4.07684	1.23058	-3.31293	0.00092323	0.0154085	0	54	46	2	2	1	down
Ibat.Brg_v3.09FG016430	228.512	2.27895	0.212122	10.7436	6.35173e-27	1.17706e-24	77	106	71	432	362	279	up
Ibat.Brg_v3.09FG018440	28.9483	2.02422	0.526059	3.8479	0.000119134	0.00271316	14	15	8	44	56	32	up
Ibat.Brg_v3.09FG019170	37.9654	-2.09895	0.492206	-4.26437	2.00465e-05	0.000562368	42	89	71	13	10	17	down
Ibat.Brg_v3.09FG019590	113.91	1.08837	0.277127	3.92733	8.5894e-05	0.00205129	68	110	60	136	163	137	up
Ibat.Brg_v3.09FG019840	49.7837	3.21527	0.510605	6.29697	3.03512e-10	1.86139e-08	10	5	16	65	73	110	up
Ibat.Brg_v3.09FG020650	17.5951	-1.98173	0.651149	-3.04344	0.00233893	0.0325333	28	33	30	9	5	6	down
Ibat.Brg_v3.09FG021210	61.1368	1.46236	0.347934	4.20299	2.63413e-05	0.000718561	40	37	28	95	86	72	up
Ibat.Brg_v3.09FG026210	43.7108	2.15367	0.505736	4.2585	2.05806e-05	0.000575467	16	18	18	42	118	44	up
Ibat.Brg_v3.09FG027950	180.994	-1.05531	0.208414	-5.06352	4.11591e-07	1.63134e-05	281	274	233	109	113	108	down
Ibat.Brg_v3.09FG029070	32.243	1.86965	0.571871	3.26936	0.00107793	0.0174979	20	7	17	73	41	30	up
Ibat.Brg_v3.09FG029250	355.311	1.5102	0.154682	9.76323	1.61915e-22	2.40967e-20	172	232	196	558	463	458	up
Ibat.Brg_v3.09FG029620	32.7746	2.00728	0.690822	2.90563	0.00366509	0.0459343	9	5	28	66	70	16	up
Ibat.Brg_v3.09FG029760	71.4292	1.60456	0.328614	4.88282	1.0458e-06	3.86301e-05	42	40	32	111	89	101	up
Ibat.Brg_v3.09FG029960	105.088	1.59484	0.26868	5.93584	2.92343e-09	1.60176e-07	43	61	66	155	165	126	up
Ibat.Brg_v3.09FG030570	15.2091	-5.32566	1.56457	-3.40392	0.000664272	0.0116709	2	4	90	0	0	2	down
Ibat.Brg_v3.10AG000910	119.828	-1.61631	0.476854	-3.38952	0.000700148	0.0122114	61	413	136	69	55	43	down
Ibat.Brg_v3.10AG002600	2061.13	1.36605	0.0942837	14.4888	1.42692e-47	4.66106e-45	1335	1235	1143	2873	3111	2397	up
Ibat.Brg_v3.10AG003530	70.9051	-1.42308	0.332762	-4.27656	1.89807e-05	0.000535783	102	121	112	30	50	29	down
Ibat.Brg_v3.10AG003540	171.907	-2.07743	0.276724	-7.50722	6.03946e-14	5.40746e-12	258	324	321	56	96	36	down
Ibat.Brg_v3.10AG004810	49.1885	1.25982	0.367385	3.42917	0.000605431	0.0108081	29	36	29	66	67	62	up
Ibat.Brg_v3.10AG008950	36.6133	2.18955	0.565679	3.87065	0.000108544	0.00250229	6	15	22	50	36	79	up
Ibat.Brg_v3.10AG009100	2937.03	1.2971	0.0586308	22.1232	1.8895e-108	1.51731e-105	1665	2074	1774	4129	4049	3574	up
Ibat.Brg_v3.10AG012240	113.127	4.11051	0.347533	11.8277	2.80785e-32	6.34771e-30	11	10	19	222	177	200	up
Ibat.Brg_v3.10AG013090	25.1723	-2.96307	0.77158	-3.84026	0.000122905	0.00278418	52	12	77	3	7	6	down
Ibat.Brg_v3.10AG018640	17.1564	2.32402	0.732624	3.17218	0.00151297	0.0230004	2	12	5	23	35	23	up
Ibat.Brg_v3.10AG019840	44.32	2.13549	0.446869	4.77878	1.76361e-06	6.20525e-05	21	19	13	93	57	54	up
Ibat.Brg_v3.10AG020460	43.2873	1.72725	0.465031	3.71427	0.000203792	0.00431484	32	18	14	77	55	55	up
Ibat.Brg_v3.10AG020530	32.6068	-4.11086	0.647746	-6.34641	2.20393e-10	1.36906e-08	44	85	73	4	2	4	down
Ibat.Brg_v3.10AG021500	45.8818	3.95223	0.549661	7.1903	6.46483e-13	5.21311e-11	3	3	12	73	83	85	up
Ibat.Brg_v3.10BG000690	143.031	-1.00157	0.297464	-3.36702	0.000759854	0.0131133	216	137	257	109	79	80	down
Ibat.Brg_v3.10BG003620	233.602	1.22103	0.197711	6.17583	6.5818e-10	3.87322e-08	112	158	186	319	325	277	up
Ibat.Brg_v3.10BG003680	129.017	-1.63519	0.255442	-6.40141	1.53948e-10	9.70389e-09	209	199	221	67	49	60	down
Ibat.Brg_v3.10BG003690	253.963	-2.15658	0.215478	-10.0083	1.40078e-23	2.21283e-21	345	567	443	75	86	99	down
Ibat.Brg_v3.10BG004580	11.5826	3.54836	1.14007	3.11241	0.00185565	0.0270317	2	4	0	44	14	4	up
Ibat.Brg_v3.10BG005390	33.4189	-1.59348	0.538839	-2.95725	0.00310391	0.0403788	74	51	35	11	14	21	down
Ibat.Brg_v3.10BG006220	30.2449	-5.39985	1.08453	-4.979	6.39133e-07	2.45494e-05	108	6	69	2	2	0	down
Ibat.Brg_v3.10BG006930	44.1032	2.48865	0.546296	4.5555	5.22611e-06	0.000167797	18	18	7	66	38	101	up
Ibat.Brg_v3.10BG007000	22.7321	-2.73405	0.916815	-2.98212	0.00286263	0.0379893	6	21	102	4	10	3	down
Ibat.Brg_v3.10BG008040	336.741	1.13339	0.154072	7.35625	1.89145e-13	1.61834e-11	192	259	234	445	419	433	up
Ibat.Brg_v3.10BG008090	57.4507	-1.31096	0.407455	-3.21744	0.00129342	0.0202251	71	75	119	29	45	20	down
Ibat.Brg_v3.10BG012360	237.013	1.36116	0.189346	7.18877	6.53758e-13	5.26077e-11	143	144	142	282	380	298	up
Ibat.Brg_v3.10BG017110	35.2593	1.48293	0.491089	3.01967	0.00253051	0.0345391	16	31	14	47	67	34	up
Ibat.Brg_v3.10BG018520	29.2332	-2.32636	0.537873	-4.3251	1.5246e-05	0.000441349	56	55	46	8	7	12	down
Ibat.Brg_v3.10BG018560	334.215	1.39893	0.158199	8.84285	9.33102e-19	1.17154e-16	193	206	195	450	437	469	up
Ibat.Brg_v3.10BG018710	97.3534	-1.24358	0.347575	-3.57788	0.000346397	0.00677931	106	143	196	40	82	42	down
Ibat.Brg_v3.10BG019100	48.8857	1.87752	0.420493	4.46505	8.00504e-06	0.000247041	22	31	15	69	63	82	up
Ibat.Brg_v3.10BG020370	116.028	2.25802	0.282308	7.99844	1.2601e-15	1.29521e-13	28	52	51	210	179	153	up
Ibat.Brg_v3.10BG020980	160.298	1.3022	0.236365	5.5093	3.6027e-08	1.68425e-06	115	106	77	228	206	206	up
Ibat.Brg_v3.10BG021080	16.8741	-2.96074	0.828495	-3.57363	0.000352065	0.00686585	21	52	26	8	2	1	down
Ibat.Brg_v3.10BG021550	107.157	-1.05491	0.264392	-3.98995	6.6088e-05	0.00164028	146	184	140	79	67	51	down
Ibat.Brg_v3.10BG022630	26.6652	1.66907	0.544197	3.06703	0.00216194	0.0305694	9	22	11	36	48	31	up
Ibat.Brg_v3.10BG022780	115.872	2.83866	0.285847	9.93069	3.06127e-23	4.72932e-21	25	27	40	206	206	162	up
Ibat.Brg_v3.10BG022850	13.7184	2.99128	0.799787	3.74009	0.000183952	0.00395011	2	4	4	30	21	18	up
Ibat.Brg_v3.10BG026090	478.812	1.33228	0.137459	9.69222	3.25392e-22	4.75084e-20	265	353	267	695	713	530	up
Ibat.Brg_v3.10BG026130	886.478	5.54025	0.170382	32.5166	6.20692e-232	1.29322e-228	26	40	55	1796	1601	1487	up
Ibat.Brg_v3.10CG000920	9.85389	-6.65215	1.73131	-3.84226	0.000121907	0.00276568	4	62	2	0	0	0	down
Ibat.Brg_v3.10CG001330	33.0863	1.48174	0.475981	3.11303	0.00185176	0.0270005	19	13	24	46	49	42	up
Ibat.Brg_v3.10CG001590	29.5483	-4.30995	0.90209	-4.77774	1.77279e-06	6.22616e-05	11	80	96	6	0	2	down
Ibat.Brg_v3.10CG002460	45.1515	-1.26483	0.400708	-3.15649	0.0015968	0.0240049	55	69	83	29	26	20	down
Ibat.Brg_v3.10CG004210	139.046	1.164	0.242281	4.80432	1.55279e-06	5.53164e-05	68	115	97	186	171	182	up
Ibat.Brg_v3.10CG004260	85.5822	-1.85776	0.314858	-5.90029	3.62871e-09	1.94939e-07	154	128	149	42	30	32	down
Ibat.Brg_v3.10CG004280	116.784	-1.82105	0.251761	-7.23325	4.71574e-13	3.8592e-11	185	218	187	54	47	44	down
Ibat.Brg_v3.10CG005450	54.1253	1.16924	0.357299	3.27244	0.00106622	0.0173481	31	36	41	72	83	57	up
Ibat.Brg_v3.10CG006050	243.932	-1.65855	0.337605	-4.91269	8.98364e-07	3.35108e-05	340	199	647	108	135	89	down
Ibat.Brg_v3.10CG008720	50.158	1.63099	0.386635	4.21843	2.46011e-05	0.000675632	28	26	25	90	65	59	up
Ibat.Brg_v3.10CG015110	7.2292	-4.29021	1.42238	-3.01622	0.00255947	0.0348472	16	10	18	2	0	0	down
Ibat.Brg_v3.10CG017130	38.2628	2.60671	0.464743	5.60892	2.03597e-08	9.8837e-07	9	12	14	65	56	63	up
Ibat.Brg_v3.10CG017390	100.93	-2.1183	0.287688	-7.36319	1.79564e-13	1.53806e-11	154	217	163	31	38	37	down
Ibat.Brg_v3.10CG018200	27.2113	-2.15987	0.6287	-3.43545	0.000591573	0.0106217	33	52	60	17	3	8	down
Ibat.Brg_v3.10CG018240	267.109	1.29872	0.179568	7.23249	4.74225e-13	3.87677e-11	160	172	167	353	329	379	up
Ibat.Brg_v3.10CG018540	52.1528	2.12039	0.380075	5.57888	2.42069e-08	1.16341e-06	21	21	21	89	73	76	up
Ibat.Brg_v3.10CG018770	775.898	1.30855	0.10117	12.9342	2.88775e-38	7.67643e-36	412	550	488	1069	1085	957	up
Ibat.Brg_v3.10CG019750	96.3339	1.14002	0.28251	4.03533	5.45248e-05	0.00137995	46	75	75	129	121	122	up
Ibat.Brg_v3.10CG020490	67.6476	1.14833	0.325457	3.52836	0.000418135	0.00794138	47	49	40	106	83	74	up
Ibat.Brg_v3.10CG020960	24.6831	-2.04032	0.664772	-3.0692	0.00214635	0.0304045	48	47	33	16	2	9	down
Ibat.Brg_v3.10CG020980	99.3881	1.06103	0.301406	3.52026	0.000431128	0.0081241	42	88	81	140	120	118	up
Ibat.Brg_v3.10CG021360	38.1826	1.53392	0.468019	3.27747	0.00104743	0.0171255	14	25	25	74	40	46	up
Ibat.Brg_v3.10CG021560	33.7211	2.19209	0.513788	4.26653	1.98538e-05	0.000557567	12	9	18	71	49	37	up
Ibat.Brg_v3.10CG022020	77.93	1.54185	0.349585	4.41053	1.03119e-05	0.000310949	52	44	32	99	94	129	up
Ibat.Brg_v3.10CG022170	52.4025	1.85839	0.455775	4.07743	4.55357e-05	0.00117481	37	17	18	93	92	49	up
Ibat.Brg_v3.10CG022680	80.1994	1.33772	0.36709	3.64412	0.000268308	0.00547337	63	36	46	140	79	103	up
Ibat.Brg_v3.10CG023820	61.782	1.1344	0.359035	3.15957	0.00158002	0.0238223	41	40	44	92	99	51	up
Ibat.Brg_v3.10CG024980	46.9944	2.97526	0.471173	6.31458	2.70889e-10	1.67465e-08	16	11	7	65	78	89	up
Ibat.Brg_v3.10CG026090	1134.64	1.50606	0.0906589	16.6123	5.67491e-62	2.60404e-59	592	735	590	1642	1589	1486	up
Ibat.Brg_v3.10CG026130	5052.34	5.74378	0.247908	23.169	9.35071e-119	8.19144e-116	145	191	265	10104	8771	8964	up
Ibat.Brg_v3.10CG026370	317.049	-1.031	0.188426	-5.47161	4.45962e-08	2.05864e-06	481	423	466	247	172	168	down
Ibat.Brg_v3.10CG027000	13.535	2.39219	0.762853	3.13584	0.00171362	0.0253898	4	4	6	16	28	20	up
Ibat.Brg_v3.10CG027820	49.1719	3.0371	0.510168	5.95314	2.63045e-09	1.44844e-07	11	21	3	75	89	82	up
Ibat.Brg_v3.10DG001070	89.2176	-1.36141	0.469433	-2.90011	0.00373033	0.0466079	67	80	269	47	53	41	down
Ibat.Brg_v3.10DG001230	58.3806	-2.02486	0.565705	-3.57936	0.000344435	0.00674823	173	93	30	17	21	26	down
Ibat.Brg_v3.10DG001290	27.5628	1.93795	0.540519	3.58534	0.000336636	0.00661965	8	11	18	37	40	45	up
Ibat.Brg_v3.10DG001360	500.895	4.5101	0.183925	24.5214	8.7322e-133	8.63033e-130	28	52	57	1000	931	777	up
Ibat.Brg_v3.10DG001380	59.2955	2.00748	0.413695	4.85256	1.21877e-06	4.4465e-05	12	41	25	82	98	87	up
Ibat.Brg_v3.10DG001890	49.8387	-1.80841	0.445627	-4.05813	4.94669e-05	0.00126523	57	131	68	21	28	14	down
Ibat.Brg_v3.10DG003450	15.2065	2.22562	0.755699	2.94511	0.00322836	0.0415552	9	4	4	19	19	31	up
Ibat.Brg_v3.10DG004130	64.9222	-1.53907	0.38004	-4.04976	5.12699e-05	0.00130744	108	104	99	31	20	41	down
Ibat.Brg_v3.10DG005330	59.0533	1.38498	0.388068	3.5689	0.000358478	0.00697326	32	37	37	119	64	59	up
Ibat.Brg_v3.10DG006810	70.2312	-1.0159	0.313666	-3.23881	0.0012003	0.0190236	105	99	99	43	50	38	down
Ibat.Brg_v3.10DG010010	75.5701	-1.25513	0.417033	-3.00968	0.00261523	0.0353885	173	97	68	36	55	35	down
Ibat.Brg_v3.10DG010570	37.54	2.86027	0.824798	3.46784	0.000524661	0.00960259	11	5	13	162	16	13	up
Ibat.Brg_v3.10DG012450	161.564	1.62001	0.226355	7.15698	8.24736e-13	6.55452e-11	81	98	78	211	224	246	up
Ibat.Brg_v3.10DG012840	135.542	4.16845	0.311049	13.4013	5.9427e-41	1.68427e-38	18	12	16	238	238	243	up
Ibat.Brg_v3.10DG012850	130.703	3.88374	0.33072	11.7433	7.64743e-32	1.70881e-29	27	11	15	238	223	225	up
Ibat.Brg_v3.10DG014970	18.1678	2.60309	0.883998	2.94468	0.0032329	0.0415929	4	12	1	18	13	53	up
Ibat.Brg_v3.10DG017250	153.267	-1.18461	0.361273	-3.27899	0.00104179	0.0170513	146	426	136	103	83	78	down
Ibat.Brg_v3.10DG017640	63.5534	-1.07922	0.36955	-2.92037	0.00349618	0.0442926	95	95	88	35	28	50	down
Ibat.Brg_v3.10DG017910	92.9072	1.34539	0.427153	3.14967	0.00163454	0.0244058	42	61	68	130	210	46	up
Ibat.Brg_v3.10DG018660	76.8712	-1.11134	0.342213	-3.2475	0.00116425	0.0185899	136	117	85	54	52	32	down
Ibat.Brg_v3.10DG019320	53.4575	1.73537	0.38385	4.52095	6.15622e-06	0.000194581	20	24	36	83	75	73	up
Ibat.Brg_v3.10DG019580	25.9233	3.13136	0.914616	3.42369	0.000617767	0.0109884	7	4	6	116	12	7	up
Ibat.Brg_v3.10DG020080	11.2367	3.47421	0.921414	3.77052	0.000162905	0.00355458	2	2	2	18	22	18	up
Ibat.Brg_v3.10DG020330	18.4233	-1.96467	0.658465	-2.98371	0.0028478	0.0378492	35	27	32	4	9	8	down
Ibat.Brg_v3.10DG021350	144.609	1.25003	0.250406	4.99202	5.97496e-07	2.30305e-05	106	99	71	226	184	164	up
Ibat.Brg_v3.10DG022240	8.9861	5.73334	1.72773	3.31843	0.000905243	0.0151641	1	0	0	20	32	0	up
Ibat.Brg_v3.10DG022600	123.932	1.35629	0.25009	5.4232	5.85427e-08	2.65943e-06	63	98	66	161	187	154	up
Ibat.Brg_v3.10DG022930	143.737	-1.163	0.258469	-4.49957	6.8091e-06	0.000213033	158	262	229	100	67	82	down
Ibat.Brg_v3.10DG022950	94.0929	-1.09555	0.325419	-3.36657	0.000761079	0.0131315	133	127	153	67	36	64	down
Ibat.Brg_v3.10DG023100	71.2546	1.16017	0.367357	3.15816	0.0015877	0.0239054	37	48	58	130	65	82	up
Ibat.Brg_v3.10DG023610	763.231	1.49003	0.104553	14.2514	4.39228e-46	1.37085e-43	371	465	464	1070	1095	999	up
Ibat.Brg_v3.10DG024190	94.1661	2.83928	0.316391	8.97394	2.86098e-19	3.65644e-17	22	30	23	190	135	140	up
Ibat.Brg_v3.10DG024920	21.3342	-4.25135	0.861476	-4.93496	8.01692e-07	3.0236e-05	39	68	26	0	4	2	down
Ibat.Brg_v3.10DG026330	30.7696	-3.39536	0.930018	-3.65085	0.000261369	0.00535306	9	13	160	4	6	5	down
Ibat.Brg_v3.10DG026560	16.8098	-3.0157	1.02046	-2.95524	0.00312421	0.0405737	70	14	8	1	2	7	down
Ibat.Brg_v3.10DG026630	36.9995	1.31268	0.440444	2.98037	0.00287901	0.0381303	18	24	27	43	63	43	up
Ibat.Brg_v3.10DG026670	5443.08	5.44286	0.307813	17.6823	5.73591e-70	3.04953e-67	172	254	370	10992	9417	9476	up
Ibat.Brg_v3.10DG026760	236.743	-1.15159	0.195365	-5.89455	3.75708e-09	2.01554e-07	278	374	409	154	128	131	down
Ibat.Brg_v3.10DG026880	67.5625	-1.01894	0.336335	-3.02953	0.00244935	0.0336518	98	96	98	56	36	34	down
Ibat.Brg_v3.10EG000360	24.5206	-2.41027	0.832422	-2.89549	0.00378569	0.0470936	6	40	90	4	12	6	down
Ibat.Brg_v3.10EG001120	120.461	-3.93476	1.20704	-3.25985	0.00111469	0.0179586	330	15	361	25	8	9	down
Ibat.Brg_v3.10EG001500	24.5233	2.30442	0.708051	3.2546	0.00113552	0.0182255	7	14	6	22	20	68	up
Ibat.Brg_v3.10EG003500	54.666	1.16031	0.363262	3.19413	0.00140252	0.0215981	36	32	41	80	80	54	up
Ibat.Brg_v3.10EG006190	24.9833	3.30113	0.982412	3.36023	0.000778764	0.0133827	4	7	4	7	7	104	up
Ibat.Brg_v3.10EG006310	15.3582	-3.1165	0.908851	-3.42905	0.000605694	0.0108086	34	49	7	4	3	2	down
Ibat.Brg_v3.10EG006810	25.6452	3.01146	0.955411	3.15201	0.00162153	0.0242585	8	3	7	8	119	7	up
Ibat.Brg_v3.10EG007350	11.1793	-3.28092	1.01642	-3.22793	0.00124689	0.0196369	20	12	33	3	3	0	down
Ibat.Brg_v3.10EG017110	480.667	1.15967	0.140699	8.2422	1.69079e-16	1.83582e-14	255	368	344	629	611	622	up
Ibat.Brg_v3.10EG018660	178.511	-1.11055	0.229617	-4.83651	1.32135e-06	4.79807e-05	187	302	307	105	105	107	down
Ibat.Brg_v3.10EG018790	116.449	1.12386	0.323014	3.47931	0.000502714	0.00926028	67	86	85	234	121	99	up
Ibat.Brg_v3.10EG019360	429.992	1.11774	0.14378	7.77397	7.60663e-15	7.32994e-13	257	309	313	565	518	565	up
Ibat.Brg_v3.10EG019980	65.7002	2.85282	0.382591	7.45657	8.88056e-14	7.82403e-12	17	24	11	122	120	85	up
Ibat.Brg_v3.10EG020070	60.6713	1.08994	0.351818	3.09801	0.00194822	0.0280673	34	45	47	100	68	65	up
Ibat.Brg_v3.10EG020410	145.491	2.03504	0.289848	7.02106	2.20198e-12	1.66259e-10	35	95	58	234	210	213	up
Ibat.Brg_v3.10EG020820	7494.44	1.08437	0.0430056	25.2147	2.76714e-140	2.96276e-137	4631	5740	5215	10023	10153	8524	up
Ibat.Brg_v3.10EG020890	95.9773	-1.46626	0.473639	-3.09574	0.00196325	0.0282521	271	65	103	44	52	47	down
Ibat.Brg_v3.10EG021090	368.809	1.08392	0.144897	7.48059	7.39879e-14	6.55601e-12	251	271	243	534	479	401	up
Ibat.Brg_v3.10EG021760	19.682	-4.3996	0.871665	-5.04735	4.47973e-07	1.76195e-05	39	49	34	0	3	2	down
Ibat.Brg_v3.10EG022100	72.6948	-1.07504	0.32647	-3.29292	0.000991528	0.0163571	117	103	97	36	49	46	down
Ibat.Brg_v3.10EG022960	449.874	1.32359	0.15374	8.60924	7.35444e-18	8.64258e-16	304	300	225	597	651	560	up
Ibat.Brg_v3.10EG023000	5563.51	5.24553	0.208058	25.2119	2.9697e-140	3.13608e-137	216	334	381	10969	9689	9773	up
Ibat.Brg_v3.10FG000210	65.2079	-5.95937	1.34536	-4.42956	9.44243e-06	0.00028692	88	38	285	1	5	0	down
Ibat.Brg_v3.10FG002660	68.8313	-2.72115	0.355797	-7.64805	2.04049e-14	1.90207e-12	109	152	128	19	16	16	down
Ibat.Brg_v3.10FG003050	10.8544	4.07263	1.05266	3.86889	0.000109332	0.00251821	0	2	2	20	22	16	up
Ibat.Brg_v3.10FG009680	32.2831	-3.62192	0.9175	-3.9476	7.89393e-05	0.00190766	3	94	103	6	7	1	down
Ibat.Brg_v3.10FG010600	75.4251	1.21898	0.361248	3.37435	0.000739902	0.0128084	29	71	49	86	94	114	up
Ibat.Brg_v3.10FG012650	224.065	1.81983	0.224681	8.09962	5.51312e-16	5.85409e-14	98	93	128	355	273	347	up
Ibat.Brg_v3.10FG013690	73.0911	1.35596	0.330368	4.1044	4.05362e-05	0.00105787	37	45	51	103	81	109	up
Ibat.Brg_v3.10FG014410	27.5174	2.81056	0.651677	4.31281	1.61196e-05	0.000464371	8	5	9	58	19	56	up
Ibat.Brg_v3.10FG015070	31.8173	2.12651	0.53648	3.96383	7.37579e-05	0.00180108	18	12	8	42	69	36	up
Ibat.Brg_v3.10FG015310	103.843	1.38533	0.281619	4.91916	8.69177e-07	3.25424e-05	46	84	58	156	131	135	up
Ibat.Brg_v3.10FG016250	63.9391	2.61595	0.372662	7.01963	2.22455e-12	1.67471e-10	21	22	15	124	90	95	up
Ibat.Brg_v3.10FG017850	27.585	2.38002	0.545325	4.3644	1.27474e-05	0.000375648	6	12	11	40	40	49	up
Ibat.Brg_v3.10FG018030	144.416	1.48069	0.225782	6.55804	5.45195e-11	3.65788e-09	76	88	83	218	226	158	up
Ibat.Brg_v3.10FG018100	21.1177	-1.88779	0.647837	-2.914	0.00356836	0.0449999	33	44	31	12	3	10	down
Ibat.Brg_v3.10FG018530	88.2048	1.09666	0.308029	3.56026	0.00037049	0.00716276	47	56	79	112	105	119	up
Ibat.Brg_v3.10FG019820	40.3476	-2.28156	0.644856	-3.5381	0.000403023	0.00769272	112	46	53	27	4	8	down
Ibat.Brg_v3.10FG022120	71.6146	4.0038	0.412191	9.71345	2.64246e-22	3.88754e-20	12	6	9	127	135	117	up
Ibat.Brg_v3.10FG023270	1626.37	5.51753	0.130234	42.3664	0	0	66	72	87	3303	2837	2804	up
Ibat.Brg_v3.10FG023590	79.8879	-1.33578	0.417238	-3.20148	0.00136726	0.0211481	181	125	59	46	47	35	down
Ibat.Brg_v3.11AG000010	13.5817	3.12623	1.04606	2.98857	0.00280285	0.0373942	2	2	5	27	2	37	up
Ibat.Brg_v3.11AG000240	51.149	3.90411	0.543955	7.17726	7.11198e-13	5.69305e-11	4	11	6	145	62	65	up
Ibat.Brg_v3.11AG000650	25.0105	-3.07554	0.989491	-3.10821	0.00188226	0.0273265	5	10	130	5	6	4	down
Ibat.Brg_v3.11AG002450	63.6007	1.08834	0.338873	3.21165	0.00131973	0.0205324	32	58	43	85	79	79	up
Ibat.Brg_v3.11AG002620	126.501	2.2592	0.259358	8.71076	3.01834e-18	3.62436e-16	40	53	49	240	187	164	up
Ibat.Brg_v3.11AG003600	72.4617	-1.3284	0.334119	-3.97584	7.01309e-05	0.00172398	92	107	137	47	42	28	down
Ibat.Brg_v3.11AG003680	25.17	3.6311	0.677015	5.3634	8.16714e-08	3.6205e-06	6	2	4	54	31	45	up
Ibat.Brg_v3.11AG003920	36.141	-1.33788	0.459849	-2.9094	0.00362128	0.0454814	43	52	73	19	24	15	down
Ibat.Brg_v3.11AG004060	380.823	-1.04552	0.170562	-6.12982	8.79763e-10	5.09548e-08	457	591	619	291	236	177	down
Ibat.Brg_v3.11AG004530	89.9277	1.71332	0.53455	3.20516	0.00134989	0.0209146	30	90	20	165	195	40	up
Ibat.Brg_v3.11AG004700	195.192	1.0944	0.184879	5.91953	3.2287e-09	1.75405e-07	126	140	137	253	265	230	up
Ibat.Brg_v3.11AG004940	95.9606	1.23331	0.366436	3.3657	0.000763497	0.0131585	59	72	55	102	211	73	up
Ibat.Brg_v3.11AG005270	176.528	1.23315	0.208567	5.91249	3.3698e-09	1.82172e-07	95	125	122	214	243	237	up
Ibat.Brg_v3.11AG006100	662.44	1.04859	0.104567	10.028	1.14855e-23	1.82185e-21	437	508	454	843	920	753	up
Ibat.Brg_v3.11AG007050	5746.9	5.33533	0.199416	26.7548	1.08633e-157	1.39575e-154	215	315	374	11448	10439	9665	up
Ibat.Brg_v3.11AG007140	13.907	4.40745	0.997592	4.41808	9.95798e-06	0.00030128	2	0	2	22	32	21	up
Ibat.Brg_v3.11AG010030	85.8293	1.53725	0.42047	3.65604	0.000256142	0.00527121	19	78	49	82	151	125	up
Ibat.Brg_v3.11AG010300	74.4666	1.65107	0.343825	4.80204	1.57054e-06	5.58712e-05	36	34	46	128	81	107	up
Ibat.Brg_v3.11AG011860	92.0001	-1.35383	0.305473	-4.4319	9.34067e-06	0.000284052	143	115	167	47	58	41	down
Ibat.Brg_v3.11AG015640	27.6712	3.34893	0.902546	3.71054	0.000206816	0.00436567	5	6	5	37	3	94	up
Ibat.Brg_v3.11AG018670	37.2227	2.91115	0.49755	5.85097	4.88706e-09	2.58575e-07	13	8	7	65	58	61	up
Ibat.Brg_v3.11AG020210	110.649	-1.86409	0.291595	-6.39273	1.62954e-10	1.0238e-08	150	199	215	58	34	42	down
Ibat.Brg_v3.11AG023390	82.749	-1.50285	0.312413	-4.81046	1.5058e-06	5.38663e-05	97	164	139	39	49	34	down
Ibat.Brg_v3.11BG000820	130.906	1.74638	0.252384	6.91952	4.53185e-12	3.31776e-10	65	79	51	218	181	169	up
Ibat.Brg_v3.11BG002470	120.159	1.92523	0.305097	6.31022	2.78639e-10	1.71842e-08	39	62	62	161	145	221	up
Ibat.Brg_v3.11BG002690	184.584	1.11395	0.376395	2.95952	0.00308114	0.0401682	128	158	93	234	409	88	up
Ibat.Brg_v3.11BG002750	44.1207	1.22962	0.40852	3.00994	0.002613	0.0353707	32	28	25	74	56	45	up
Ibat.Brg_v3.11BG002830	450.424	1.99588	0.147508	13.5306	1.03121e-41	2.95524e-39	165	213	208	748	618	655	up
Ibat.Brg_v3.11BG003430	22.445	-5.38139	1.20552	-4.46397	8.04542e-06	0.000248008	52	4	82	2	1	0	down
Ibat.Brg_v3.11BG003460	44.7185	3.72779	0.527669	7.06464	1.61035e-12	1.23771e-10	10	2	8	87	78	69	up
Ibat.Brg_v3.11BG004110	81.4028	1.30361	0.329859	3.95203	7.74902e-05	0.00187794	56	44	51	126	133	71	up
Ibat.Brg_v3.11BG006240	759.669	1.18579	0.0999001	11.8697	1.69994e-32	3.87718e-30	443	545	517	1009	1087	879	up
Ibat.Brg_v3.11BG006310	18.7865	2.6053	0.676011	3.85394	0.000116234	0.00265596	8	5	4	40	26	25	up
Ibat.Brg_v3.11BG006650	38.3034	-1.72566	0.438872	-3.93204	8.42279e-05	0.00201879	59	61	70	14	20	16	down
Ibat.Brg_v3.11BG007100	60.5244	2.07214	0.379794	5.45596	4.87088e-08	2.24043e-06	23	20	32	117	83	76	up
Ibat.Brg_v3.11BG007130	106.098	1.82695	0.50254	3.63543	0.000277522	0.00562264	25	60	68	48	154	249	up
Ibat.Brg_v3.11BG007140	1213.25	1.11105	0.0851979	13.0408	7.16937e-39	1.92574e-36	736	885	869	1691	1650	1339	up
Ibat.Brg_v3.11BG008110	481.448	2.30729	0.128942	17.894	1.31387e-71	7.28676e-69	155	194	176	800	771	684	up
Ibat.Brg_v3.11BG008200	3053.21	5.85086	0.212861	27.4868	2.5236e-166	3.47401e-163	73	124	142	6018	5605	5252	up
Ibat.Brg_v3.11BG008850	33.9084	1.829	0.468645	3.90274	9.51102e-05	0.00224258	17	14	17	50	62	38	up
Ibat.Brg_v3.11BG009020	28.3544	1.77276	0.525155	3.37569	0.000736305	0.0127617	18	10	13	48	36	39	up
Ibat.Brg_v3.11BG010040	103.566	1.03988	0.340655	3.0526	0.00226871	0.0317241	64	62	93	133	191	75	up
Ibat.Brg_v3.11BG010050	52.266	-1.2255	0.376258	-3.25706	0.00112571	0.0180944	71	90	77	30	39	20	down
Ibat.Brg_v3.11BG010400	133.99	1.99929	0.271126	7.374	1.65587e-13	1.42468e-11	58	69	47	238	234	138	up
Ibat.Brg_v3.11BG010490	164.684	1.15079	0.207773	5.53869	3.04743e-08	1.43686e-06	115	110	105	229	217	193	up
Ibat.Brg_v3.11BG011710	371.574	1.49419	0.150092	9.95514	2.39481e-23	3.72961e-21	205	244	182	529	516	495	up
Ibat.Brg_v3.11BG012160	90.7019	1.28313	0.291772	4.39771	1.094e-05	0.000328158	42	62	68	128	139	97	up
Ibat.Brg_v3.11BG016520	35.593	-1.52077	0.471565	-3.22494	0.00126001	0.0197789	65	59	46	24	15	13	down
Ibat.Brg_v3.11BG016820	80.6804	1.05242	0.286945	3.66768	0.000244764	0.0050641	52	60	58	97	112	97	up
Ibat.Brg_v3.11BG019840	63.3032	1.71842	0.363936	4.72176	2.33808e-06	8.06095e-05	37	32	26	115	76	82	up
Ibat.Brg_v3.11BG021150	16.4126	4.65828	0.9708	4.79839	1.59946e-06	5.66907e-05	3	1	0	26	37	26	up
Ibat.Brg_v3.11BG021340	32.9812	-2.74767	0.546862	-5.02443	5.04933e-07	1.9709e-05	40	76	72	11	5	8	down
Ibat.Brg_v3.11BG022160	40.783	-1.79422	0.567737	-3.1603	0.00157609	0.0237678	98	80	25	23	19	10	down
Ibat.Brg_v3.11BG022410	13.5861	2.67313	0.83162	3.21437	0.00130733	0.0204054	2	4	6	34	12	20	up
Ibat.Brg_v3.11BG022830	9.93391	3.51235	1.10503	3.17852	0.0014803	0.0225526	4	0	1	15	11	24	up
Ibat.Brg_v3.11BG024520	137.222	-1.59616	0.385101	-4.14478	3.40141e-05	0.000903255	79	332	274	63	69	60	down
Ibat.Brg_v3.11BG024730	17.6745	-2.10744	0.670719	-3.14206	0.00167763	0.0249476	27	30	36	8	8	3	down
Ibat.Brg_v3.11CG000740	15.7322	3.14137	1.03079	3.04755	0.00230719	0.0321979	8	2	0	32	6	39	up
Ibat.Brg_v3.11CG001310	19.2338	2.95276	0.839664	3.51659	0.000437125	0.00821501	6	2	6	55	8	32	up
Ibat.Brg_v3.11CG002010	55.3597	2.18802	0.457391	4.7837	1.72099e-06	6.06914e-05	35	12	16	100	85	71	up
Ibat.Brg_v3.11CG003200	81.402	1.71873	0.29634	5.79985	6.63746e-09	3.44799e-07	37	46	40	120	113	117	up
Ibat.Brg_v3.11CG003450	17.6374	2.7518	0.773921	3.55566	0.000377025	0.00727167	1	6	8	45	20	22	up
Ibat.Brg_v3.11CG006610	78.3783	1.66708	0.310413	5.37052	7.85107e-08	3.50133e-06	37	51	34	107	113	114	up
Ibat.Brg_v3.11CG007480	467.741	1.00867	0.137298	7.34656	2.0337e-13	1.73427e-11	279	379	352	632	660	476	up
Ibat.Brg_v3.11CG007580	60.0367	2.16834	0.665991	3.25582	0.00113067	0.0181629	28	19	23	26	230	30	up
Ibat.Brg_v3.11CG008510	4011.3	2.81017	0.0769212	36.5331	3.30231e-292	9.42871e-289	983	1051	1204	7243	6963	5613	up
Ibat.Brg_v3.11CG008520	61.8296	4.09247	0.448255	9.12978	6.86397e-20	9.07622e-18	10	5	7	107	117	104	up
Ibat.Brg_v3.11CG008540	28.2065	7.39859	1.27796	5.78937	7.06489e-09	3.66509e-07	1	0	0	45	65	48	up
Ibat.Brg_v3.11CG008690	66.8731	1.73727	0.524604	3.31158	0.000927715	0.0154617	27	35	38	67	38	172	up
Ibat.Brg_v3.11CG009160	9.76068	4.35061	1.16354	3.73913	0.000184657	0.00396304	0	2	1	17	16	19	up
Ibat.Brg_v3.11CG009240	28.715	-2.99398	0.560765	-5.3391	9.3411e-08	4.10317e-06	47	65	54	6	6	6	down
[truncated: 834 more rows]

## Sheet: M1-125T-S_vs_M1-125-S
gene	baseMean	log2FoldChange	lfcSE	stat	pvalue	padj	M1-125-S-1counts	M1-125-S-2counts	M1-125-S-3counts	M1-125T-S-1 counts	M1-125T-S-2 counts	M1-125T-S-3 counts	significant
Ibat.Brg_v3.01AG002250	10.028	2.99237	1.05323	2.84114	0.00449529	0.0445825	44	6	3	1	1	5	up
Ibat.Brg_v3.01AG002780	52.2481	1.01828	0.313926	3.24371	0.00117984	0.0159391	62	80	53	36	53	29	up
Ibat.Brg_v3.01AG003190	114.774	1.53479	0.221698	6.92291	4.42463e-12	3.3394e-10	176	158	142	49	106	50	up
Ibat.Brg_v3.01AG003920	27.962	-1.87461	0.618052	-3.0331	0.00242055	0.0278528	10	12	11	91	40	12	down
Ibat.Brg_v3.01AG003980	18.6606	2.35994	0.776597	3.03881	0.00237511	0.0274143	11	69	9	2	14	6	up
Ibat.Brg_v3.01AG004300	43.9693	1.238	0.357942	3.45866	0.00054288	0.00837977	49	66	55	20	37	31	up
Ibat.Brg_v3.01AG005070	34.141	-1.85824	0.481087	-3.86258	0.000112194	0.00220476	11	17	13	25	115	53	down
Ibat.Brg_v3.01AG005160	49.31	-1.1368	0.373773	-3.04143	0.00235461	0.0272308	34	41	13	60	127	53	down
Ibat.Brg_v3.01AG005950	95.6925	-1.34297	0.270372	-4.96712	6.79539e-07	2.39984e-05	75	43	35	159	213	100	down
Ibat.Brg_v3.01AG006990	21.0101	1.65855	0.516299	3.21238	0.00131642	0.0173616	43	23	24	11	17	7	up
Ibat.Brg_v3.01AG007220	137.834	-1.00775	0.208815	-4.82606	1.39262e-06	4.57253e-05	104	65	85	194	276	157	down
Ibat.Brg_v3.01AG010340	14.4678	1.95691	0.68347	2.8632	0.00419391	0.0423505	17	20	26	4	16	2	up
Ibat.Brg_v3.01AG010750	43.8498	-1.52601	0.543998	-2.80518	0.00502889	0.0484405	22	28	14	18	196	41	down
Ibat.Brg_v3.01AG012550	65.5217	1.10349	0.326254	3.38231	0.000718792	0.010602	85	56	102	37	56	46	up
Ibat.Brg_v3.01AG015220	60.1656	-1.95928	0.371386	-5.27557	1.32342e-07	5.33727e-06	26	9	32	95	135	92	down
Ibat.Brg_v3.01AG015650	20.5623	-1.56362	0.548522	-2.8506	0.00436373	0.0435997	8	6	14	33	34	33	down
Ibat.Brg_v3.01AG015730	147.032	1.00473	0.268058	3.7482	0.000178105	0.00329144	163	125	242	89	171	80	up
Ibat.Brg_v3.01AG016590	183.755	1.1546	0.169648	6.80582	1.00474e-11	7.28128e-10	237	255	211	103	161	120	up
Ibat.Brg_v3.01AG017080	64.7975	-2.30335	0.337648	-6.82175	8.99376e-12	6.55787e-10	24	12	24	103	134	119	down
Ibat.Brg_v3.01AG017720	39.6355	-2.51026	0.54449	-4.61029	4.02103e-06	0.00011884	12	13	8	26	66	122	down
Ibat.Brg_v3.01AG019930	58.7726	1.12923	0.302981	3.72707	0.00019372	0.00354131	74	79	71	32	68	29	up
Ibat.Brg_v3.01AG020100	1061.76	-1.22755	0.0753768	-16.2855	1.25008e-59	1.09606e-56	669	617	486	1521	2062	1426	down
Ibat.Brg_v3.01AG020110	128.099	1.06834	0.219386	4.86968	1.11779e-06	3.7715e-05	211	132	141	78	110	89	up
Ibat.Brg_v3.01AG020630	37.3262	-1.16007	0.379393	-3.0577	0.0022304	0.0261262	30	20	15	45	76	54	down
Ibat.Brg_v3.01AG020710	54.5521	-1.31144	0.312196	-4.20069	2.66103e-05	0.000637822	39	27	22	80	116	69	down
Ibat.Brg_v3.01AG020820	90.7009	-1.76253	0.254887	-6.91494	4.68075e-12	3.5252e-10	32	45	37	139	195	137	down
Ibat.Brg_v3.01AG021190	41.4681	1.64172	0.36708	4.47238	7.73531e-06	0.000212143	70	52	53	14	33	22	up
Ibat.Brg_v3.01AG021280	84.4013	1.17647	0.313519	3.75248	0.000175094	0.00324593	123	91	108	49	44	72	up
Ibat.Brg_v3.01AG021290	66.6283	1.0143	0.270383	3.75134	0.000175891	0.00325732	94	87	68	40	66	44	up
Ibat.Brg_v3.01AG022240	67.3815	-1.0422	0.293657	-3.54904	0.000386643	0.00631395	42	35	44	81	117	103	down
Ibat.Brg_v3.01AG022500	8.03769	-3.81178	1.12177	-3.39801	0.000678768	0.0101103	1	1	1	8	37	11	down
Ibat.Brg_v3.01AG022940	12.8886	-2.31389	0.772326	-2.99601	0.00273538	0.0306028	2	6	4	10	56	15	down
Ibat.Brg_v3.01AG023050	61.8865	1.28152	0.311295	4.11673	3.84278e-05	0.000875849	75	93	75	45	57	22	up
Ibat.Brg_v3.01AG023670	273.103	-1.08292	0.139056	-7.78766	6.82601e-15	6.81833e-13	178	151	157	368	570	329	down
Ibat.Brg_v3.01AG023940	12.3394	-2.88353	0.784097	-3.67751	0.000235517	0.00417952	2	2	4	16	26	29	down
Ibat.Brg_v3.01AG025410	41.2994	-2.5887	0.400321	-6.46655	1.00264e-10	6.39778e-09	12	14	7	66	106	69	down
Ibat.Brg_v3.01AG025720	23.8978	-1.88511	0.512909	-3.67534	0.000237533	0.00421153	12	4	12	37	57	34	down
Ibat.Brg_v3.01AG026490	10.7708	2.93197	0.95409	3.07305	0.00211881	0.0250965	42	6	8	0	6	3	up
Ibat.Brg_v3.01AG026950	75.0521	-1.04717	0.303305	-3.45253	0.000555357	0.00854822	41	45	48	92	109	127	down
Ibat.Brg_v3.01AG027050	60.4248	1.18816	0.353919	3.35716	0.000787483	0.0114605	68	76	86	18	67	43	up
Ibat.Brg_v3.01AG027250	493.964	1.18842	0.101606	11.6963	1.33093e-31	3.92209e-29	706	627	577	287	471	272	up
Ibat.Brg_v3.01AG029380	79.5829	1.72717	0.348892	4.95045	7.4042e-07	2.59796e-05	101	184	61	25	61	41	up
Ibat.Brg_v3.01AG030640	546.218	1.21993	0.108216	11.2732	1.78065e-29	4.77214e-27	831	687	611	366	428	305	up
Ibat.Brg_v3.01AG032120	58.0568	1.47294	0.351911	4.18555	2.84479e-05	0.000675256	87	95	58	44	48	14	up
Ibat.Brg_v3.01AG032230	79.1904	1.07726	0.253973	4.24163	2.21905e-05	0.000543063	112	108	80	59	67	45	up
Ibat.Brg_v3.01AG032810	102.241	-6.1712	1.77571	-3.47535	0.000510191	0.00796171	6	0	2	443	226	5	down
Ibat.Brg_v3.01AG033510	47.0895	-1.02116	0.346901	-2.94366	0.0032436	0.0348126	30	30	26	80	70	57	down
Ibat.Brg_v3.01BG000480	393.82	1.83074	0.125973	14.5327	7.51686e-48	4.61949e-45	576	575	547	162	241	179	up
Ibat.Brg_v3.01BG000630	47.4807	1.56629	0.364205	4.30058	1.70353e-05	0.000430549	102	50	49	23	37	22	up
Ibat.Brg_v3.01BG002640	80.4717	-1.88906	0.305326	-6.18704	6.13052e-10	3.51404e-08	24	43	28	93	228	122	down
Ibat.Brg_v3.01BG002680	49.5807	-3.11427	0.416488	-7.47747	7.57668e-14	6.89867e-12	14	10	5	63	151	94	down
Ibat.Brg_v3.01BG002700	90.2434	-2.0455	0.275506	-7.4245	1.13211e-13	1.01008e-11	26	35	36	148	245	111	down
Ibat.Brg_v3.01BG003000	30.2679	1.98353	0.478066	4.14908	3.33821e-05	0.000776332	53	47	35	22	11	7	up
Ibat.Brg_v3.01BG004210	52.267	-1.62752	0.453067	-3.59223	0.000327859	0.00550836	24	17	29	116	135	26	down
Ibat.Brg_v3.01BG005140	620.646	-1.03005	0.100629	-10.236	1.36737e-24	2.80667e-22	379	370	379	815	1283	747	down
Ibat.Brg_v3.01BG005510	26.8537	1.88593	0.459739	4.10218	4.09273e-05	0.000925688	50	42	27	14	13	11	up
Ibat.Brg_v3.01BG005530	197.407	1.178	0.178329	6.60576	3.95482e-11	2.66481e-09	246	255	252	128	147	126	up
Ibat.Brg_v3.01BG006740	58.6504	-1.37038	0.352684	-3.88557	0.000102089	0.00204006	44	33	16	58	127	102	down
Ibat.Brg_v3.01BG007320	289.744	1.52655	0.149567	10.2065	1.85467e-24	3.79594e-22	399	440	357	155	250	111	up
Ibat.Brg_v3.01BG007590	15.3348	-2.24737	0.664299	-3.38307	0.000716795	0.0105862	3	10	2	25	37	24	down
Ibat.Brg_v3.01BG010320	63.6217	-1.02957	0.300845	-3.42226	0.000621036	0.00938624	52	37	29	69	153	77	down
Ibat.Brg_v3.01BG013780	71.7726	1.46114	0.279028	5.23656	1.63598e-07	6.48365e-06	101	106	85	48	45	34	up
Ibat.Brg_v3.01BG014030	17.0572	2.12592	0.663434	3.20442	0.00135336	0.0177459	24	14	36	6	4	10	up
Ibat.Brg_v3.01BG015760	93.3018	-1.19569	0.260164	-4.59593	4.30819e-06	0.000126485	66	54	39	101	184	152	down
Ibat.Brg_v3.01BG015820	47.4126	1.082	0.384445	2.81444	0.00488628	0.0473365	75	37	65	24	36	40	up
Ibat.Brg_v3.01BG016460	67.278	1.13169	0.288402	3.92402	8.70852e-05	0.00177451	97	101	61	49	50	41	up
Ibat.Brg_v3.01BG017310	54.6403	1.38246	0.324794	4.25643	2.07719e-05	0.000513424	72	64	81	28	53	24	up
Ibat.Brg_v3.01BG017420	81.8407	-1.39883	0.268128	-5.21703	1.8181e-07	7.15753e-06	35	56	34	118	167	115	down
Ibat.Brg_v3.01BG019280	396.782	1.00545	0.117458	8.56004	1.12825e-17	1.3984e-15	582	496	405	238	424	244	up
Ibat.Brg_v3.01BG020390	38.4695	1.97802	0.43291	4.56913	4.8976e-06	0.000141508	46	73	51	22	26	6	up
Ibat.Brg_v3.01BG022720	46.11	-1.36195	0.386057	-3.52785	0.000418954	0.00675156	17	32	22	57	74	85	down
Ibat.Brg_v3.01BG024800	43.324	-1.83147	0.38222	-4.79167	1.65399e-06	5.34909e-05	25	20	9	74	109	51	down
Ibat.Brg_v3.01BG025640	22.7849	-1.44275	0.493658	-2.92257	0.00347153	0.0367325	14	10	10	31	38	40	down
Ibat.Brg_v3.01BG026510	19.7124	-4.06864	0.965903	-4.21227	2.5282e-05	0.000608861	1	1	4	24	124	3	down
Ibat.Brg_v3.01BG027230	130.919	-1.11725	0.212974	-5.24592	1.55504e-07	6.20097e-06	71	84	73	164	236	197	down
Ibat.Brg_v3.01BG027370	27.4003	-1.7462	0.47953	-3.64148	0.000271079	0.0047002	18	14	4	46	62	36	down
Ibat.Brg_v3.01BG027860	180.354	1.10894	0.174812	6.34364	2.24397e-10	1.36327e-08	263	215	206	113	146	122	up
Ibat.Brg_v3.01BG027910	207.76	1.1943	0.201429	5.92915	3.04508e-09	1.59016e-07	307	224	267	163	141	112	up
Ibat.Brg_v3.01BG030190	227.431	1.76103	0.58746	2.99771	0.00272016	0.0304708	145	582	245	110	163	83	up
Ibat.Brg_v3.01BG030370	145.111	1.10324	0.241145	4.57499	4.76251e-06	0.000138055	220	177	156	54	142	117	up
Ibat.Brg_v3.01BG030420	10.6003	-2.22637	0.791661	-2.81227	0.00491925	0.0476104	2	2	6	23	22	13	down
Ibat.Brg_v3.01BG030440	36.2905	1.53413	0.464748	3.301	0.000963416	0.0135034	34	82	34	24	16	20	up
Ibat.Brg_v3.01BG030610	100.419	-3.40818	1.20638	-2.82513	0.0047262	0.0462143	13	22	13	62	29	434	down
Ibat.Brg_v3.01BG031720	207.003	-1.91701	0.171211	-11.1968	4.22787e-29	1.09585e-26	100	86	57	319	463	323	down
Ibat.Brg_v3.01BG032420	21.0128	-1.77408	0.545091	-3.25465	0.00113532	0.0154464	5	12	9	40	35	31	down
Ibat.Brg_v3.01BG032770	20.4934	1.4504	0.51648	2.80823	0.00498144	0.0480616	34	33	18	7	19	12	up
Ibat.Brg_v3.01BG033070	36.7487	1.18339	0.382849	3.091	0.00199483	0.0239757	57	52	34	23	25	26	up
Ibat.Brg_v3.01BG035080	12.8316	-4.10006	1.16822	-3.50965	0.000448692	0.00714968	1	3	0	63	9	3	down
Ibat.Brg_v3.01BG035930	155.822	1.15403	0.200441	5.75748	8.53792e-09	4.2021e-07	236	176	184	106	112	101	up
Ibat.Brg_v3.01BG036860	10.6432	-2.83124	0.949884	-2.98062	0.00287669	0.0318179	0	2	5	11	53	8	down
Ibat.Brg_v3.01BG036940	327.793	1.34891	0.147843	9.12388	7.24808e-20	1.06796e-17	488	462	367	148	337	161	up
Ibat.Brg_v3.01BG036950	103.886	1.66672	0.230297	7.23727	4.57807e-13	3.82962e-11	148	145	144	46	82	43	up
Ibat.Brg_v3.01BG038400	60.7253	-1.06757	0.309226	-3.45238	0.000555659	0.00855101	46	30	33	100	98	74	down
Ibat.Brg_v3.01BG038510	7.51282	-4.35441	1.53784	-2.83151	0.0046329	0.0455035	0	2	0	2	59	1	down
Ibat.Brg_v3.01CG001030	86.4618	1.98357	0.280455	7.07268	1.51965e-12	1.21401e-10	122	153	110	33	68	22	up
Ibat.Brg_v3.01CG001370	12.5462	3.11418	0.829969	3.75217	0.000175311	0.00324911	16	30	16	3	0	5	up
Ibat.Brg_v3.01CG001630	54.8957	-1.44109	0.44414	-3.24468	0.00117581	0.0158938	29	21	31	145	82	36	down
Ibat.Brg_v3.01CG001850	12.2411	-2.90276	1.01462	-2.86092	0.00422411	0.0425949	3	3	2	6	4	52	down
Ibat.Brg_v3.01CG002140	111.93	-1.97635	0.273534	-7.22527	5.00099e-13	4.15404e-11	43	63	22	145	272	191	down
Ibat.Brg_v3.01CG002970	92.4171	-1.22408	0.260317	-4.70228	2.57275e-06	8.01037e-05	49	70	36	111	189	138	down
Ibat.Brg_v3.01CG003410	17.6525	-2.05112	0.59102	-3.47048	0.000519529	0.00807904	5	9	5	35	31	27	down
Ibat.Brg_v3.01CG003780	88.1836	1.17629	0.337042	3.49003	0.000482965	0.00760873	124	139	82	25	127	46	up
Ibat.Brg_v3.01CG003990	51.3807	1.20228	0.415807	2.89144	0.00383481	0.0396085	57	38	96	29	33	39	up
Ibat.Brg_v3.01CG004670	198.102	-1.14958	0.161637	-7.1121	1.14289e-12	9.24466e-11	141	107	96	273	409	248	down
Ibat.Brg_v3.01CG004950	242.621	1.08922	0.157969	6.89513	5.3814e-12	4.02302e-10	357	291	272	179	235	116	up
Ibat.Brg_v3.01CG005490	23.8928	-1.39025	0.490664	-2.83341	0.00460541	0.0452826	17	9	11	39	60	22	down
Ibat.Brg_v3.01CG007410	11.157	-4.87183	1.19178	-4.08785	4.35398e-05	0.00097638	0	0	2	26	31	16	down
Ibat.Brg_v3.01CG013280	6.50282	4.55302	1.57883	2.8838	0.00392903	0.0403178	2	33	1	0	2	0	up
Ibat.Brg_v3.01CG017470	16.1514	-1.85691	0.650108	-2.8563	0.00428604	0.0429997	6	4	9	39	33	13	down
Ibat.Brg_v3.01CG018780	74.4731	1.00376	0.355288	2.8252	0.00472509	0.0462098	68	66	131	61	54	47	up
Ibat.Brg_v3.01CG019460	221.016	1.21493	0.164532	7.38413	1.53453e-13	1.34879e-11	320	247	287	139	197	116	up
Ibat.Brg_v3.01CG019860	56.3096	-1.98616	0.347097	-5.7222	1.05153e-08	5.09413e-07	20	22	21	100	158	57	down
Ibat.Brg_v3.01CG019880	103.295	-1.22005	0.2453	-4.97371	6.56839e-07	2.32778e-05	70	65	39	150	172	155	down
Ibat.Brg_v3.01CG021960	155.299	-1.24388	0.212995	-5.83997	5.22104e-09	2.64856e-07	112	93	56	205	389	172	down
Ibat.Brg_v3.01CG021970	239.563	1.22556	0.14683	8.34679	7.01412e-17	8.12631e-15	354	318	263	156	191	135	up
Ibat.Brg_v3.01CG022380	11.1899	2.0423	0.700338	2.91616	0.0035437	0.0373024	16	19	15	5	7	3	up
Ibat.Brg_v3.01CG022580	9.63838	-3.32665	0.944406	-3.52248	0.000427535	0.00686492	4	1	0	18	21	19	down
Ibat.Brg_v3.01CG023070	399.022	1.02838	0.120651	8.5236	1.54672e-17	1.8972e-15	559	561	380	248	379	262	up
Ibat.Brg_v3.01CG023250	17.2004	2.24751	0.741365	3.03158	0.00243279	0.0279535	20	8	46	10	4	5	up
Ibat.Brg_v3.01CG023750	56.8857	-1.10563	0.324981	-3.40213	0.00066863	0.00998446	27	36	36	96	105	60	down
Ibat.Brg_v3.01CG025520	39.1047	-1.46201	0.453627	-3.22293	0.00126889	0.0168473	18	18	21	95	49	40	down
Ibat.Brg_v3.01CG025950	17.724	-1.60953	0.566851	-2.83942	0.00451961	0.044721	6	10	8	30	29	28	down
Ibat.Brg_v3.01CG026500	20.768	-1.77419	0.534506	-3.3193	0.000902434	0.0128149	11	6	9	42	40	25	down
Ibat.Brg_v3.01CG026750	33.2678	-1.31087	0.439357	-2.98361	0.00284867	0.0315867	22	14	17	70	55	32	down
Ibat.Brg_v3.01CG026950	23.3788	-2.84352	0.616594	-4.61165	3.99491e-06	0.000118216	2	12	2	53	49	34	down
Ibat.Brg_v3.01CG027710	41.0677	1.16177	0.376496	3.08575	0.00203042	0.0242966	59	42	56	26	47	16	up
Ibat.Brg_v3.01CG029800	45.0403	1.178	0.35569	3.31186	0.000926781	0.013097	63	47	62	34	41	19	up
Ibat.Brg_v3.01CG029830	469.271	1.20471	0.106503	11.3116	1.15022e-29	3.11789e-27	662	621	540	262	462	252	up
Ibat.Brg_v3.01CG030000	66.8285	-1.18376	0.410278	-2.88527	0.00391076	0.040197	24	53	36	58	236	55	down
Ibat.Brg_v3.01CG030450	8.20563	3.28721	1.07	3.07216	0.00212518	0.025155	8	28	6	4	1	0	up
Ibat.Brg_v3.01CG030560	33.4762	-2.64119	0.634355	-4.16358	3.13295e-05	0.000734574	13	7	6	125	30	25	down
Ibat.Brg_v3.01DG000590	92.7238	1.52076	0.268407	5.66589	1.46262e-08	6.96214e-07	170	132	88	49	87	32	up
Ibat.Brg_v3.01DG000680	6.72438	-5.06194	1.54528	-3.27575	0.00105381	0.0144959	1	0	0	12	2	24	down
Ibat.Brg_v3.01DG002090	76.7891	-1.14399	0.286316	-3.99555	6.45453e-05	0.00136714	58	36	40	105	192	75	down
Ibat.Brg_v3.01DG003130	125.829	1.11219	0.220312	5.04824	4.45899e-07	1.62482e-05	212	145	127	88	127	59	up
Ibat.Brg_v3.01DG003430	35.1149	2.25281	0.418592	5.38187	7.3715e-08	3.133e-06	76	50	38	13	16	12	up
Ibat.Brg_v3.01DG004250	239.407	1.31771	0.197184	6.68265	2.34656e-11	1.61956e-09	394	316	249	88	214	165	up
Ibat.Brg_v3.01DG004330	103.267	1.28892	0.283172	4.55171	5.3212e-06	0.000152138	164	174	77	63	63	70	up
Ibat.Brg_v3.01DG004400	99.608	-1.17878	0.238418	-4.94419	7.64602e-07	2.67762e-05	57	74	40	142	207	122	down
Ibat.Brg_v3.01DG004410	111.343	-1.64841	0.237423	-6.94293	3.84052e-12	2.93599e-10	60	56	35	144	237	187	down
Ibat.Brg_v3.01DG006120	89.5477	1.04846	0.243916	4.29844	1.72005e-05	0.000433955	134	121	84	68	83	47	up
Ibat.Brg_v3.01DG007110	31.4641	-1.41462	0.462054	-3.06159	0.00220163	0.025836	11	27	10	58	64	33	down
Ibat.Brg_v3.01DG007790	48.4462	1.05845	0.374892	2.82335	0.00475253	0.0463976	87	53	44	37	27	37	up
Ibat.Brg_v3.01DG007930	7.6438	-6.25596	1.47043	-4.25452	2.09501e-05	0.000516983	0	0	0	31	12	6	down
Ibat.Brg_v3.01DG009860	18.9416	-2.7005	0.846465	-3.19033	0.00142112	0.0184176	6	4	4	8	11	77	down
Ibat.Brg_v3.01DG009990	32.078	-1.96021	0.54739	-3.58102	0.000342261	0.00571132	9	16	11	35	34	88	down
Ibat.Brg_v3.01DG010410	24.1456	2.04025	0.494149	4.12882	3.64634e-05	0.000837256	31	37	38	10	10	11	up
Ibat.Brg_v3.01DG012940	65.9979	1.28462	0.280634	4.57758	4.70387e-06	0.000136653	94	83	82	45	51	33	up
Ibat.Brg_v3.01DG013520	429.343	1.36943	0.11815	11.5907	4.59613e-31	1.31091e-28	621	625	478	228	319	256	up
Ibat.Brg_v3.01DG015390	43.8651	-1.73164	0.371934	-4.65576	3.22788e-06	9.74677e-05	23	21	13	85	93	50	down
Ibat.Brg_v3.01DG016470	355.832	1.15458	0.15251	7.57054	3.71688e-14	3.47791e-12	468	435	450	267	258	204	up
Ibat.Brg_v3.01DG016840	151.596	-1.84353	0.196394	-9.38688	6.18024e-21	9.8856e-19	67	53	63	227	364	218	down
Ibat.Brg_v3.01DG017710	15.3013	-1.70058	0.595122	-2.85753	0.00426956	0.0428949	8	6	6	26	30	22	down
Ibat.Brg_v3.01DG019710	132.283	1.36367	0.210147	6.48911	8.63424e-11	5.56951e-09	193	152	180	79	98	71	up
Ibat.Brg_v3.01DG021360	8.34074	-3.09613	0.997026	-3.10536	0.00190046	0.0231244	3	2	0	24	18	8	down
Ibat.Brg_v3.01DG022290	5.00204	-5.64269	1.70056	-3.31813	0.000906222	0.0128514	0	0	0	26	4	1	down
Ibat.Brg_v3.01DG023170	10.8213	-6.76218	1.38255	-4.89109	1.0028e-06	3.41742e-05	0	0	0	8	33	32	down
Ibat.Brg_v3.01DG023700	5.31824	-5.72911	1.59384	-3.59452	0.000324985	0.00546929	0	0	0	24	5	4	down
Ibat.Brg_v3.01DG025520	180.393	1.00744	0.170067	5.92379	3.14614e-09	1.63811e-07	243	240	188	106	169	129	up
Ibat.Brg_v3.01DG025580	53.6891	-1.99568	0.360244	-5.53981	3.02793e-08	1.36362e-06	14	31	15	72	144	81	down
Ibat.Brg_v3.01DG025840	56.3803	-1.20066	0.406869	-2.95098	0.00316767	0.0341948	45	20	30	126	67	59	down
Ibat.Brg_v3.01DG025980	165.236	1.0505	0.170438	6.16356	7.11288e-10	4.03802e-08	219	223	178	108	154	102	up
Ibat.Brg_v3.01DG026260	80.3369	-1.08449	0.282301	-3.8416	0.000122236	0.00237516	35	54	52	91	164	115	down
Ibat.Brg_v3.01DG026430	78.0048	-1.55092	0.311149	-4.98449	6.21244e-07	2.21046e-05	27	60	24	121	173	102	down
Ibat.Brg_v3.01DG026650	68.6966	-1.01531	0.317975	-3.19304	0.00140782	0.0182719	39	36	49	76	109	116	down
Ibat.Brg_v3.01DG027460	46.9047	1.16964	0.329658	3.54803	0.000388123	0.0063323	64	72	46	26	46	27	up
Ibat.Brg_v3.01DG028720	26.4178	-2.22397	0.740174	-3.00466	0.00265878	0.0299535	5	6	14	31	138	5	down
Ibat.Brg_v3.01DG028890	24.4722	1.94702	0.683346	2.84925	0.00438227	0.0437549	89	20	7	10	20	6	up
Ibat.Brg_v3.01DG029230	119.227	1.01134	0.268737	3.7633	0.000167683	0.00313225	164	203	84	66	101	96	up
Ibat.Brg_v3.01EG000620	12.3681	-4.44018	1.02669	-4.32473	1.52718e-05	0.000389305	1	0	2	27	42	14	down
Ibat.Brg_v3.01EG002030	68.6189	-1.30636	0.327982	-3.98302	6.80445e-05	0.00143143	55	31	26	67	190	90	down
Ibat.Brg_v3.01EG002040	158.988	-1.01695	0.203915	-4.98713	6.12838e-07	2.18273e-05	107	82	102	175	368	196	down
Ibat.Brg_v3.01EG002050	709.624	-1.03109	0.11341	-9.09171	9.74936e-20	1.43354e-17	505	426	370	769	1464	1013	down
Ibat.Brg_v3.01EG002810	6.96296	-6.11421	1.45759	-4.19473	2.73191e-05	0.000651293	0	0	0	20	8	15	down
Ibat.Brg_v3.01EG003640	74.0337	-1.22058	0.284228	-4.29438	1.75181e-05	0.000441496	61	40	25	103	154	96	down
Ibat.Brg_v3.01EG003980	60.6588	-1.24603	0.376467	-3.30979	0.000933668	0.0131749	45	14	40	63	134	94	down
Ibat.Brg_v3.01EG005500	14.8319	-2.01927	0.650766	-3.10292	0.00191622	0.0232434	4	4	8	22	45	17	down
Ibat.Brg_v3.01EG005700	29.559	-2.20416	0.470981	-4.67994	2.86963e-06	8.8302e-05	14	12	4	53	78	37	down
Ibat.Brg_v3.01EG006200	17.2231	-3.50673	0.844739	-4.15126	3.30656e-05	0.000770698	5	3	0	63	31	10	down
Ibat.Brg_v3.01EG006270	6.93213	-4.2284	1.37143	-3.08321	0.00204779	0.0244674	0	2	0	7	40	5	down
Ibat.Brg_v3.01EG014100	8.34162	-3.44781	1.20209	-2.86819	0.00412826	0.0418363	0	4	0	3	49	9	down
Ibat.Brg_v3.01EG014730	98.4625	1.6043	0.36406	4.40669	1.04961e-05	0.000278875	176	65	164	36	52	70	up
Ibat.Brg_v3.01EG016930	20.0617	-5.18691	0.952486	-5.44566	5.16145e-08	2.24062e-06	2	0	1	37	67	32	down
Ibat.Brg_v3.01EG016970	10.2636	-3.05116	0.896661	-3.4028	0.00066698	0.00996821	0	3	3	11	31	21	down
Ibat.Brg_v3.01EG017000	87.9319	-1.62181	0.28974	-5.59745	2.17522e-08	1.00315e-06	38	33	47	102	182	159	down
Ibat.Brg_v3.01EG017890	13.4787	-2.14752	0.670088	-3.20484	0.00135139	0.0177306	5	6	3	18	42	18	down
Ibat.Brg_v3.01EG020210	112.685	1.36098	0.225695	6.03018	1.63773e-09	8.90596e-08	170	125	153	66	92	56	up
Ibat.Brg_v3.01EG020330	683.378	-1.41465	0.100497	-14.0766	5.29159e-45	2.80454e-42	350	386	300	907	1424	1023	down
Ibat.Brg_v3.01EG021250	23.188	1.8532	0.514857	3.59944	0.0003189	0.00537765	53	33	18	9	14	11	up
Ibat.Brg_v3.01EG021290	87.7167	1.5667	0.319333	4.90617	9.28718e-07	3.19407e-05	133	128	103	67	32	42	up
Ibat.Brg_v3.01EG021430	18.6842	-2.1297	0.635967	-3.34877	0.000811724	0.0117435	12	7	1	42	30	27	down
Ibat.Brg_v3.01EG021520	129.513	-1.25612	0.223427	-5.62207	1.88685e-08	8.81607e-07	62	93	58	188	299	144	down
Ibat.Brg_v3.01EG022070	58.4463	-1.01963	0.328535	-3.10357	0.00191203	0.023217	33	28	44	82	92	83	down
Ibat.Brg_v3.01EG022200	130.798	-1.14833	0.200311	-5.73272	9.88324e-09	4.81088e-07	82	82	63	193	277	147	down
Ibat.Brg_v3.01EG023730	29.9722	-1.70749	0.477194	-3.57819	0.000345981	0.00575836	17	7	15	32	93	39	down
Ibat.Brg_v3.01EG024180	108.129	-1.22617	0.269271	-4.55368	5.27155e-06	0.000151084	72	73	38	101	265	161	down
Ibat.Brg_v3.01EG025080	71.5692	1.3473	0.416027	3.2385	0.00120159	0.016147	61	51	158	43	66	30	up
Ibat.Brg_v3.01EG028440	76.6251	-1.44587	0.350936	-4.12005	3.78785e-05	0.000865271	50	40	26	56	175	150	down
Ibat.Brg_v3.01EG030200	43.8166	1.47872	0.41549	3.55897	0.00037231	0.00612354	97	41	45	31	37	12	up
Ibat.Brg_v3.01EG030730	9.26679	-2.64278	0.928757	-2.8455	0.00443423	0.0441496	2	2	3	30	18	5	down
Ibat.Brg_v3.01EG031210	18.8237	-4.63177	1.0243	-4.52191	6.12853e-06	0.000172786	2	0	2	8	24	78	down
Ibat.Brg_v3.01EG031460	18.0661	2.72869	0.776968	3.51198	0.000444782	0.00710331	55	8	26	0	11	6	up
Ibat.Brg_v3.01EG031640	627.169	1.06353	0.0905167	11.7496	7.09784e-32	2.14506e-29	891	764	704	396	583	394	up
Ibat.Brg_v3.01EG033410	703.642	1.33679	0.0874904	15.2793	1.05016e-52	7.93433e-50	1014	921	861	411	564	373	up
Ibat.Brg_v3.01EG034310	202.584	1.48726	0.166761	8.91852	4.72567e-19	6.49163e-17	319	282	234	87	178	102	up
Ibat.Brg_v3.01EG035310	33.5834	1.88136	0.461294	4.07844	4.53397e-05	0.0010091	56	70	24	13	15	19	up
Ibat.Brg_v3.01EG037080	150.337	-2.99011	1.01284	-2.95221	0.00315511	0.0340955	84	8	8	353	325	209	down
Ibat.Brg_v3.01EG037800	13.71	-2.3904	0.707392	-3.37917	0.000727041	0.0107103	1	6	5	20	40	20	down
Ibat.Brg_v3.01EG038080	101.056	-1.28788	0.240754	-5.34935	8.8272e-08	3.68769e-06	46	54	61	144	206	134	down
Ibat.Brg_v3.01EG039020	18.2929	1.66001	0.593413	2.7974	0.00515158	0.0492814	26	17	32	8	7	13	up
Ibat.Brg_v3.01EG040030	648.722	1.07457	0.0910143	11.8066	3.60708e-32	1.1138e-29	936	856	669	389	656	385	up
Ibat.Brg_v3.01EG040100	27.4413	-1.81952	0.482071	-3.77437	0.000160411	0.00301545	10	9	14	35	51	54	down
Ibat.Brg_v3.01EG040240	71.1695	-1.09461	0.297349	-3.68125	0.000232096	0.00413119	51	46	30	91	109	117	down
Ibat.Brg_v3.01EG040450	174.751	1.05646	0.228286	4.6278	3.69575e-06	0.000110282	187	177	275	113	172	101	up
Ibat.Brg_v3.01EG041000	22.5095	-2.25564	0.758356	-2.97439	0.00293575	0.0323051	5	6	10	86	27	6	down
Ibat.Brg_v3.01FG000250	25.3843	-2.34429	0.648323	-3.61593	0.000299269	0.00508472	7	6	10	13	125	27	down
Ibat.Brg_v3.01FG000430	75.0725	1.24987	0.269842	4.63185	3.62405e-06	0.000108371	87	120	86	45	66	40	up
Ibat.Brg_v3.01FG000790	248.534	1.42696	0.167212	8.53388	1.41516e-17	1.73884e-15	334	351	315	158	155	132	up
Ibat.Brg_v3.01FG001190	5.86041	-3.33754	1.19368	-2.796	0.00517393	0.0494507	1	2	0	14	17	6	down
Ibat.Brg_v3.01FG003080	62.1937	-1.05415	0.284355	-3.70717	0.000209588	0.00379427	44	37	32	82	135	72	down
Ibat.Brg_v3.01FG004420	15.0257	2.23332	0.736408	3.03272	0.0024236	0.0278698	32	24	15	0	16	4	up
Ibat.Brg_v3.01FG006460	63.7995	-1.72581	0.302272	-5.70947	1.1333e-08	5.4716e-07	33	31	19	112	128	88	down
Ibat.Brg_v3.01FG006920	74.0962	-1.60664	0.352739	-4.55475	5.24484e-06	0.000150379	28	46	28	147	189	54	down
Ibat.Brg_v3.01FG008480	66.8261	-1.20359	0.291804	-4.12465	3.71298e-05	0.00085173	48	30	35	91	159	74	down
Ibat.Brg_v3.01FG011520	20.2901	-2.0926	0.631806	-3.31209	0.000926004	0.0130901	16	2	4	26	39	43	down
Ibat.Brg_v3.01FG011800	21.4836	-2.16054	0.70706	-3.05566	0.00224562	0.0262612	12	3	7	6	67	50	down
Ibat.Brg_v3.01FG013090	9.01732	-4.63102	1.46666	-3.15752	0.00159115	0.0200752	2	0	0	45	2	5	down
Ibat.Brg_v3.01FG013870	51.2029	1.47826	0.372742	3.9659	7.31206e-05	0.00152512	72	45	88	30	44	19	up
Ibat.Brg_v3.01FG013900	33.7597	1.89278	0.487178	3.88519	0.000102252	0.00204243	60	27	58	11	13	22	up
Ibat.Brg_v3.01FG014260	54.0933	1.13066	0.339408	3.33128	0.000864464	0.0123704	95	80	37	31	52	33	up
Ibat.Brg_v3.01FG016180	22.2617	-1.76008	0.58756	-2.99557	0.00273931	0.0306324	2	10	15	41	49	26	down
Ibat.Brg_v3.01FG018490	118.33	1.23529	0.219713	5.62229	1.88444e-08	8.81058e-07	165	142	151	79	85	70	up
Ibat.Brg_v3.01FG018940	22.0285	1.69526	0.495432	3.42177	0.00062214	0.00939832	43	30	22	10	14	11	up
Ibat.Brg_v3.01FG019160	82.2269	-1.02247	0.264514	-3.86546	0.00011088	0.00218498	44	68	39	112	153	106	down
Ibat.Brg_v3.01FG019750	64.0796	1.00981	0.297655	3.39255	0.00069245	0.0102882	112	65	64	38	68	40	up
Ibat.Brg_v3.01FG019960	14.8836	-1.80074	0.628516	-2.86506	0.00416926	0.0421496	4	6	8	22	28	26	down
Ibat.Brg_v3.01FG020770	106.135	-1.23934	0.242649	-5.10753	3.26394e-07	1.21682e-05	47	74	54	137	250	129	down
Ibat.Brg_v3.01FG020970	105.906	1.01828	0.244136	4.17094	3.03343e-05	0.000715015	134	143	118	49	133	64	up
Ibat.Brg_v3.01FG021850	24.5069	-1.60274	0.48827	-3.28249	0.00102896	0.0142312	9	9	15	32	53	39	down
Ibat.Brg_v3.01FG022060	25.7157	-1.57302	0.455597	-3.45266	0.000555088	0.00854592	12	14	10	43	54	33	down
Ibat.Brg_v3.01FG022930	37.2229	-3.41964	0.495695	-6.89867	5.24904e-12	3.92821e-10	11	4	3	79	105	50	down
Ibat.Brg_v3.01FG023400	18.0657	-2.77975	0.778623	-3.57009	0.00035686	0.00590223	4	6	3	15	103	9	down
Ibat.Brg_v3.01FG024140	34.9743	1.36507	0.404595	3.37392	0.000741047	0.0108873	55	37	47	15	25	25	up
Ibat.Brg_v3.01FG024170	7.46451	3.42945	1.04065	3.29548	0.00098254	0.0137236	16	12	10	2	0	2	up
Ibat.Brg_v3.01FG025010	26.1219	-1.44099	0.457334	-3.15084	0.001628	0.0204674	16	11	12	45	45	36	down
Ibat.Brg_v3.01FG025140	82.475	-1.85167	0.291081	-6.36136	1.9997e-10	1.22324e-08	27	51	22	133	182	121	down
Ibat.Brg_v3.01FG025190	952.944	1.26787	0.0943881	13.4325	3.90032e-41	1.77565e-38	1370	1228	1143	459	886	568	up
Ibat.Brg_v3.01FG025710	32.1077	1.30903	0.430966	3.03744	0.00238593	0.0275303	38	44	44	24	31	9	up
Ibat.Brg_v3.01FG026050	47.9648	1.00011	0.323137	3.09499	0.00196821	0.0237603	57	67	53	33	42	32	up
Ibat.Brg_v3.01FG026540	14.4286	-2.30143	0.716478	-3.21215	0.00131746	0.0173721	6	8	0	31	32	18	down
Ibat.Brg_v3.01FG026850	32.4106	-1.64379	0.445868	-3.68672	0.000227165	0.00405917	8	19	16	38	76	53	down
Ibat.Brg_v3.01FG026970	352.038	1.26685	0.119154	10.6321	2.11393e-26	4.751e-24	490	495	400	211	315	179	up
Ibat.Brg_v3.01FG027860	26.6636	2.8301	0.6056	4.67322	2.96515e-06	9.06912e-05	53	46	32	16	3	2	up
Ibat.Brg_v3.01FG028190	40.7204	1.71886	0.383565	4.48127	7.42004e-06	0.000204808	80	56	41	13	34	19	up
Ibat.Brg_v3.01FG028210	288.735	1.07691	0.167459	6.43091	1.26845e-10	7.96513e-09	398	367	322	158	225	230	up
Ibat.Brg_v3.01FG029270	41.34	-2.28985	0.397667	-5.75822	8.5008e-09	4.18673e-07	17	8	14	65	113	59	down
Ibat.Brg_v3.01FG030180	94.7261	-1.28144	0.279178	-4.59006	4.43116e-06	0.000129613	74	30	50	119	215	127	down
Ibat.Brg_v3.01FG031680	17.9998	-2.08268	0.582178	-3.57738	0.00034705	0.00576819	7	6	6	37	31	27	down
Ibat.Brg_v3.01FG031810	5.10361	-5.68131	1.49298	-3.80534	0.000141612	0.0027044	0	0	0	10	16	9	down
Ibat.Brg_v3.02AG003470	16.1137	1.96478	0.614702	3.19631	0.00139198	0.0181258	21	25	24	6	5	10	up
Ibat.Brg_v3.02AG003710	18.2684	2.04041	0.604353	3.37618	0.000734991	0.010814	41	24	18	5	6	12	up
Ibat.Brg_v3.02AG004310	34.0508	-1.4685	0.454697	-3.22963	0.0012395	0.0165437	27	20	5	41	74	55	down
Ibat.Brg_v3.02AG004390	22.5969	-2.09853	0.643049	-3.26341	0.0011008	0.0150431	12	6	6	73	30	15	down
Ibat.Brg_v3.02AG004870	26.1091	-2.04463	0.514963	-3.97044	7.17402e-05	0.00150029	8	10	10	25	58	57	down
Ibat.Brg_v3.02AG004950	12.5336	-1.99756	0.700761	-2.85056	0.00436427	0.0435997	5	4	5	16	44	13	down
Ibat.Brg_v3.02AG005250	15.2447	-5.39657	1.27858	-4.22074	2.43507e-05	0.000590234	0	2	0	24	90	4	down
Ibat.Brg_v3.02AG007750	50.9322	1.04757	0.341356	3.06886	0.00214875	0.0253707	80	75	40	36	58	22	up
Ibat.Brg_v3.02AG007930	26.3571	-1.58129	0.485798	-3.25503	0.0011338	0.0154287	12	17	8	55	52	26	down
Ibat.Brg_v3.02AG009050	66.0281	1.40968	0.339607	4.15092	3.31142e-05	0.000771326	67	72	119	35	56	32	up
Ibat.Brg_v3.02AG009690	61.3303	1.357	0.399837	3.3939	0.000689058	0.0102443	86	98	62	61	22	26	up
Ibat.Brg_v3.02AG010350	72.1845	1.38274	0.29877	4.6281	3.69042e-06	0.00011017	131	97	68	40	75	26	up
Ibat.Brg_v3.02AG010360	16.373	-3.54369	0.757437	-4.67853	2.88938e-06	8.87944e-05	1	2	4	34	30	33	down
Ibat.Brg_v3.02AG010710	52.5197	-1.27646	0.363095	-3.51551	0.000438906	0.00701895	43	34	11	77	114	64	down
Ibat.Brg_v3.02AG011210	20.4973	-2.19392	0.598779	-3.66398	0.000248323	0.00436884	8	2	10	24	46	42	down
Ibat.Brg_v3.02AG014190	9.42655	-6.58436	1.51241	-4.35356	1.33942e-05	0.000346162	0	0	0	3	68	7	down
Ibat.Brg_v3.02AG020430	250.208	-1.66768	0.156935	-10.6266	2.24171e-26	5.00649e-24	111	108	112	419	532	332	down
Ibat.Brg_v3.02AG022420	11.9015	2.61641	0.758146	3.45107	0.000558371	0.00858536	14	20	22	3	8	1	up
Ibat.Brg_v3.02AG023810	38.343	1.14796	0.379941	3.02142	0.00251595	0.0286932	50	41	54	29	35	17	up
Ibat.Brg_v3.02AG023910	58.4759	1.73014	0.364327	4.74886	2.0457e-06	6.51506e-05	74	88	85	42	38	12	up
Ibat.Brg_v3.02AG023920	56.8416	1.21088	0.348418	3.47537	0.00051014	0.00796171	56	86	76	42	58	19	up
Ibat.Brg_v3.02BG000170	11.3086	-6.83192	2.29542	-2.97632	0.00291728	0.0321716	0	0	0	4	88	4	down
Ibat.Brg_v3.02BG000740	58.0458	-1.17482	0.33999	-3.45545	0.00054937	0.0084689	41	44	16	96	97	74	down
Ibat.Brg_v3.02BG001320	104.767	-1.02468	0.280892	-3.64795	0.000264339	0.00460582	48	90	54	139	263	95	down
Ibat.Brg_v3.02BG001990	41.4171	-1.96461	0.521325	-3.76849	0.000164241	0.00307362	7	31	9	45	63	102	down
Ibat.Brg_v3.02BG002540	958.677	1.18856	0.10747	11.0595	1.9728e-28	4.96837e-26	1352	1174	1171	467	1007	553	up
Ibat.Brg_v3.02BG002770	9.14343	-3.50012	1.11445	-3.14067	0.00168561	0.0210427	0	2	2	37	8	7	down
Ibat.Brg_v3.02BG003300	11.6467	-2.63006	0.934454	-2.81454	0.00488468	0.0473275	1	5	3	14	63	3	down
Ibat.Brg_v3.02BG003900	10.8177	-3.84774	1.24853	-3.0818	0.00205752	0.0245462	2	2	0	2	4	52	down
Ibat.Brg_v3.02BG003940	35.7023	-1.89342	0.54638	-3.46539	0.000529466	0.00820124	12	9	20	88	92	16	down
Ibat.Brg_v3.02BG004300	19.9433	-3.34869	0.898192	-3.72826	0.000192806	0.00352641	4	4	2	93	13	6	down
Ibat.Brg_v3.02BG004600	19.9102	-1.7548	0.531757	-3.30001	0.000966821	0.0135408	8	8	9	34	36	31	down
Ibat.Brg_v3.02BG006590	34.9853	1.0756	0.384212	2.79951	0.00511809	0.0490469	47	43	41	24	25	25	up
Ibat.Brg_v3.02BG007110	24.4259	-1.45163	0.469167	-3.09406	0.00197435	0.0238142	11	12	13	30	53	38	down
Ibat.Brg_v3.02BG007230	123.793	-1.65661	0.26689	-6.20709	5.39753e-10	3.10894e-08	57	66	44	205	355	108	down
Ibat.Brg_v3.02BG007340	10.2966	-4.7927	1.29117	-3.71191	0.000205698	0.00372956	1	0	1	25	46	3	down
Ibat.Brg_v3.02BG008410	39.3199	-1.35066	0.440643	-3.06521	0.00217514	0.0256056	29	7	25	65	83	44	down
Ibat.Brg_v3.02BG008590	23.9253	-2.06314	0.605669	-3.40638	0.000658296	0.00986333	18	9	0	42	49	38	down
Ibat.Brg_v3.02BG010050	43.189	-1.72925	0.574759	-3.00865	0.00262408	0.0296613	24	18	14	18	51	136	down
Ibat.Brg_v3.02BG011400	772.829	1.25862	0.111353	11.303	1.26783e-29	3.42363e-27	1099	1035	892	479	532	491	up
Ibat.Brg_v3.02BG011730	30.3878	-1.63275	0.434051	-3.76165	0.000168794	0.00314723	21	13	8	48	69	40	down
Ibat.Brg_v3.02BG012030	216.554	1.13001	0.165331	6.83482	8.21059e-12	6.00532e-10	278	302	247	114	236	121	up
Ibat.Brg_v3.02BG012270	273.137	1.5013	0.144077	10.4201	2.00746e-25	4.30725e-23	448	352	327	149	222	117	up
Ibat.Brg_v3.02BG012280	7.0755	-2.81649	1.00776	-2.79481	0.00519298	0.049584	2	3	0	12	15	14	down
Ibat.Brg_v3.02BG013350	261.061	1.11379	0.19972	5.57677	2.45025e-08	1.12269e-06	367	441	201	146	217	188	up
Ibat.Brg_v3.02BG015660	103.71	1.15645	0.281206	4.11247	3.91445e-05	0.000889898	108	107	171	70	83	61	up
Ibat.Brg_v3.02BG020100	20.668	1.94294	0.618124	3.14329	0.0016706	0.020892	19	60	14	8	16	6	up
Ibat.Brg_v3.02BG025240	12.2935	-4.45339	1.0539	-4.22564	2.3826e-05	0.000579219	1	2	0	33	17	24	down
Ibat.Brg_v3.02BG027010	1588.27	-2.43286	0.0656074	-37.0822	5.4477e-301	7.73792e-297	513	477	393	2586	3978	2541	down
Ibat.Brg_v3.02BG027340	20.1603	-1.93592	0.652346	-2.96764	0.003001	0.0328045	1	15	7	21	67	27	down
Ibat.Brg_v3.02BG029740	189.371	1.52841	0.213812	7.1484	8.77948e-13	7.19168e-11	360	261	176	70	156	108	up
Ibat.Brg_v3.02BG030470	43.7838	1.55646	0.361968	4.29998	1.70814e-05	0.000431561	59	62	60	16	43	19	up
Ibat.Brg_v3.02BG030620	61.3693	1.78281	0.325521	5.47677	4.33157e-08	1.90011e-06	101	80	84	18	57	23	up
Ibat.Brg_v3.02BG031750	17.4464	1.80649	0.567676	3.18225	0.00146136	0.0188018	29	19	27	8	14	5	up
Ibat.Brg_v3.02BG031780	76.6153	1.43278	0.348267	4.11403	3.88811e-05	0.00088476	82	123	103	54	76	16	up
Ibat.Brg_v3.02BG031900	98.7786	1.47164	0.299214	4.91836	8.72742e-07	3.03091e-05	95	167	136	69	79	31	up
Ibat.Brg_v3.02BG032580	14.0056	1.79231	0.630564	2.8424	0.00447754	0.0444576	16	24	20	6	12	4	up
Ibat.Brg_v3.02CG000630	7.70092	-6.25881	1.49274	-4.19282	2.75504e-05	0.000655774	0	0	0	26	4	16	down
Ibat.Brg_v3.02CG001220	38.4374	-1.48799	0.425196	-3.49954	0.000466059	0.00738663	31	19	8	64	96	38	down
Ibat.Brg_v3.02CG003410	2177.41	-1.26628	0.0677931	-18.6787	7.38427e-78	1.04886e-74	1280	1185	1085	2809	4468	3124	down
Ibat.Brg_v3.02CG004340	7.33852	-4.24466	1.34855	-3.14758	0.00164629	0.0206535	0	1	1	30	9	5	down
Ibat.Brg_v3.02CG004490	53.3559	-1.10268	0.362706	-3.04015	0.00236462	0.0273307	44	38	15	77	132	48	down
Ibat.Brg_v3.02CG004500	55.8951	-1.13484	0.318375	-3.56448	0.000364578	0.00601447	42	23	32	76	103	78	down
Ibat.Brg_v3.02CG005800	25.7736	1.31673	0.452207	2.91179	0.00359362	0.0376707	44	36	24	17	24	10	up
Ibat.Brg_v3.02CG005950	31.837	-1.53384	0.453393	-3.38302	0.000716931	0.0105862	9	14	21	51	55	49	down
Ibat.Brg_v3.02CG007880	38.1481	3.50247	1.01101	3.46432	0.000531568	0.00823201	56	138	9	6	6	8	up
Ibat.Brg_v3.02CG008380	15.7667	-5.4256	1.25919	-4.30882	1.64128e-05	0.000415705	0	2	0	68	21	9	down
Ibat.Brg_v3.02CG009620	58.0091	1.91924	0.313259	6.12668	8.97314e-10	5.04171e-08	91	96	69	19	35	28	up
Ibat.Brg_v3.02CG010730	229.315	1.14782	0.221475	5.18263	2.18781e-07	8.42472e-06	342	376	177	190	194	98	up
Ibat.Brg_v3.02CG011010	34.7793	1.8605	0.604613	3.07717	0.00208976	0.0248352	26	113	16	8	20	22	up
Ibat.Brg_v3.02CG011470	28.8944	1.46499	0.469096	3.123	0.00179017	0.0220573	25	39	50	18	19	14	up
Ibat.Brg_v3.02CG012360	29.5861	2.83863	0.698532	4.06371	4.82986e-05	0.00106428	121	16	17	4	19	4	up
Ibat.Brg_v3.02CG013140	6.9676	-4.25658	1.39747	-3.04592	0.00231973	0.0269195	2	0	0	2	32	15	down
Ibat.Brg_v3.02CG013400	6.58892	5.3036	1.61497	3.28403	0.00102335	0.0141783	14	0	20	1	0	0	up
Ibat.Brg_v3.02CG015200	57.4537	1.22466	0.299116	4.09429	4.2347e-05	0.000954151	86	80	59	30	48	38	up
Ibat.Brg_v3.02CG016180	15.8456	-3.02916	0.839541	-3.60811	0.000308437	0.00521924	6	4	0	54	34	7	down
Ibat.Brg_v3.02CG023760	20.3141	1.56672	0.520128	3.01217	0.00259385	0.0293777	30	31	24	12	19	5	up
Ibat.Brg_v3.02CG023820	21.7273	-2.35877	0.537963	-4.38464	1.16177e-05	0.00030446	10	6	4	33	55	36	down
Ibat.Brg_v3.02CG027060	42.0711	-1.8002	0.56281	-3.19859	0.001381	0.0180193	8	23	20	115	94	15	down
Ibat.Brg_v3.02CG028200	44.3592	-1.16827	0.353171	-3.30793	0.000939867	0.0132439	21	34	21	54	99	58	down
Ibat.Brg_v3.02CG028650	20.4318	1.75421	0.542296	3.23479	0.00121734	0.0163246	32	18	36	10	15	7	up
Ibat.Brg_v3.02CG028890	47.9079	1.10773	0.379872	2.91606	0.00354483	0.0373024	89	72	27	32	43	28	up
Ibat.Brg_v3.02CG029630	14.3052	2.14418	0.640314	3.34864	0.000812078	0.0117438	22	18	24	7	8	3	up
Ibat.Brg_v3.02CG029780	57.9583	1.53907	0.392038	3.92582	8.64332e-05	0.00176393	43	86	103	29	55	20	up
Ibat.Brg_v3.02CG030020	49.9803	1.06013	0.351654	3.01471	0.00257225	0.0291823	50	79	58	36	57	20	up
Ibat.Brg_v3.02CG030030	24.6568	1.4687	0.479315	3.06415	0.00218286	0.0256582	38	28	34	19	17	8	up
Ibat.Brg_v3.02DG000840	55.8267	2.575	0.474191	5.4303	5.62594e-08	2.43631e-06	94	102	70	6	10	34	up
Ibat.Brg_v3.02DG000910	8.76429	-2.64319	0.902899	-2.92744	0.00341761	0.0363079	4	3	0	15	29	10	down
Ibat.Brg_v3.02DG001200	17.5574	-1.73959	0.583994	-2.97878	0.002894	0.0319656	4	8	10	28	44	21	down
Ibat.Brg_v3.02DG001340	7.04301	-4.25037	1.35294	-3.14159	0.00168035	0.0209844	0	2	0	9	38	5	down
Ibat.Brg_v3.02DG002300	29.3514	-1.50569	0.461745	-3.26086	0.00111075	0.0151528	8	21	13	45	52	46	down
Ibat.Brg_v3.02DG002460	35.1625	1.28725	0.456151	2.82197	0.00477291	0.0464983	78	36	28	19	19	28	up
Ibat.Brg_v3.02DG002540	62.6268	3.17326	0.384006	8.26357	1.41384e-16	1.60401e-14	68	121	117	12	17	13	up
Ibat.Brg_v3.02DG003270	23.3138	-1.53903	0.499625	-3.08036	0.00206751	0.024616	8	16	9	39	40	35	down
Ibat.Brg_v3.02DG004680	13.4635	-3.07395	0.947823	-3.24317	0.00118208	0.0159604	4	2	2	58	14	4	down
Ibat.Brg_v3.02DG006490	269.734	1.00379	0.156155	6.42813	1.29184e-10	8.09053e-09	413	310	285	149	311	163	up
Ibat.Brg_v3.02DG009450	120.36	1.46959	0.28602	5.13808	2.77559e-07	1.04685e-05	236	99	157	70	69	70	up
Ibat.Brg_v3.02DG009720	78.1618	2.23564	0.741701	3.01421	0.00257648	0.029221	66	249	50	19	39	34	up
Ibat.Brg_v3.02DG009890	24.4604	1.6034	0.502311	3.19206	0.00141264	0.0183276	56	21	27	13	17	11	up
Ibat.Brg_v3.02DG009930	25.1456	1.40146	0.499844	2.8038	0.00505036	0.0485334	41	27	33	23	16	7	up
Ibat.Brg_v3.02DG010520	24.8211	-1.64341	0.521087	-3.15382	0.00161151	0.020296	14	4	15	41	62	27	down
Ibat.Brg_v3.02DG010640	71.6229	2.23362	0.298726	7.47717	7.59377e-14	6.90537e-12	148	111	75	26	35	24	up
Ibat.Brg_v3.02DG010650	9.44802	-3.00298	0.950075	-3.16078	0.00157346	0.0199208	5	0	1	9	31	19	down
Ibat.Brg_v3.02DG015560	8.07021	-3.39798	1.03486	-3.28352	0.00102518	0.014201	2	2	0	18	26	8	down
Ibat.Brg_v3.02DG015870	13.5508	-6.11047	1.34288	-4.55027	5.35762e-06	0.000153118	0	0	1	10	54	31	down
Ibat.Brg_v3.02DG021280	14.8713	2.04905	0.662866	3.0912	0.0019935	0.0239679	36	11	20	6	6	7	up
Ibat.Brg_v3.02DG022260	19.305	-2.50884	0.585007	-4.28857	1.7983e-05	0.000451792	6	4	6	36	55	23	down
Ibat.Brg_v3.02DG024310	21.4383	2.2335	0.520046	4.29481	1.74843e-05	0.000440799	32	38	28	7	9	9	up
Ibat.Brg_v3.02DG024320	121.235	1.13223	0.267911	4.22613	2.37741e-05	0.000578652	115	178	163	91	126	46	up
Ibat.Brg_v3.02DG024330	37.1661	1.53493	0.458731	3.34603	0.000819779	0.0118311	28	57	64	24	32	10	up
Ibat.Brg_v3.02DG024610	31.2571	1.34325	0.475836	2.82292	0.00475891	0.0464255	38	44	42	23	35	5	up
Ibat.Brg_v3.02DG024640	41.1266	1.35639	0.38413	3.53106	0.000413891	0.0066897	43	66	54	27	39	14	up
Ibat.Brg_v3.02DG024650	47.9944	1.28584	0.369274	3.48208	0.000497531	0.00780359	52	73	63	29	55	15	up
Ibat.Brg_v3.02EG000720	8.66229	-3.38691	1.05525	-3.20957	0.00132933	0.0174961	0	1	3	12	12	25	down
Ibat.Brg_v3.02EG002330	17.6799	4.79993	0.899025	5.33904	9.34391e-08	3.88527e-06	25	41	28	4	0	0	up
Ibat.Brg_v3.02EG003300	32.928	1.46994	0.459414	3.19959	0.00137622	0.0179701	44	58	33	30	16	11	up
Ibat.Brg_v3.02EG003480	28.1035	-4.09617	1.39641	-2.93335	0.00335326	0.0357636	3	6	0	100	77	6	down
Ibat.Brg_v3.02EG004110	57.61	1.08185	0.296928	3.64347	0.000268989	0.00467195	77	83	59	34	63	31	up
Ibat.Brg_v3.02EG005160	98.4226	-1.01048	0.252172	-4.00712	6.14642e-05	0.00130969	49	68	63	117	230	111	down
Ibat.Brg_v3.02EG005170	118.793	-1.05692	0.218449	-4.83827	1.30975e-06	4.32845e-05	68	74	71	184	229	130	down
Ibat.Brg_v3.02EG006560	22.0385	1.57649	0.494282	3.18946	0.00142537	0.0184591	40	23	29	10	18	10	up
Ibat.Brg_v3.02EG007600	25.7878	-1.66246	0.574891	-2.89178	0.00383067	0.0395715	24	10	2	53	40	35	down
Ibat.Brg_v3.02EG007650	39.1123	1.81777	0.368496	4.93295	8.09983e-07	2.82544e-05	57	60	52	16	27	16	up
Ibat.Brg_v3.02EG007850	60.5025	1.04197	0.355279	2.93281	0.00335906	0.0358092	97	90	45	21	78	41	up
Ibat.Brg_v3.02EG008300	135.401	1.06637	0.194158	5.49227	3.96795e-08	1.75469e-06	204	166	142	97	123	76	up
Ibat.Brg_v3.02EG008960	66.2389	-1.02697	0.323889	-3.17075	0.00152048	0.0193867	51	24	45	104	105	84	down
Ibat.Brg_v3.02EG009940	6.24796	-4.10468	1.41347	-2.90397	0.00368464	0.0383981	2	0	0	4	37	6	down
Ibat.Brg_v3.02EG010050	18.0165	-3.28757	0.80572	-4.08029	4.49787e-05	0.00100232	2	2	5	63	14	23	down
Ibat.Brg_v3.02EG010100	48.3203	-1.54418	0.461917	-3.34298	0.00082885	0.0119377	17	22	28	28	103	109	down
Ibat.Brg_v3.02EG011100	67.9839	1.01316	0.293271	3.4547	0.000550899	0.00848879	72	109	71	53	59	39	up
Ibat.Brg_v3.02EG012930	27.3966	1.51768	0.436152	3.4797	0.000501973	0.0078611	36	44	33	14	24	11	up
Ibat.Brg_v3.02EG013710	58.0948	1.51008	0.430173	3.51039	0.000447446	0.00713302	34	74	119	36	40	25	up
Ibat.Brg_v3.02EG022660	22.7675	1.76089	0.550034	3.20142	0.00136752	0.0178893	22	30	42	11	8	14	up
Ibat.Brg_v3.02EG023450	95.278	-1.72492	0.242979	-7.09907	1.25596e-12	1.01247e-10	48	37	38	160	206	128	down
Ibat.Brg_v3.02EG025170	5.18811	-5.72279	1.54439	-3.70553	0.000210952	0.00381119	0	0	0	5	29	6	down
Ibat.Brg_v3.02EG026270	237.954	1.97459	0.160801	12.2797	1.16464e-34	4.07451e-32	383	346	322	111	119	92	up
Ibat.Brg_v3.02EG026690	7.93322	2.65658	0.930385	2.85535	0.00429889	0.0431042	14	10	14	2	6	0	up
Ibat.Brg_v3.02EG026900	62.8135	1.26556	0.328499	3.85255	0.000116893	0.00228699	79	71	93	47	59	21	up
Ibat.Brg_v3.02EG027190	23.5201	1.74571	0.529581	3.2964	0.000979332	0.0136877	29	37	34	15	20	3	up
Ibat.Brg_v3.02EG028060	56.5783	1.34569	0.32766	4.10699	4.00849e-05	0.000909239	59	81	82	36	49	24	up
Ibat.Brg_v3.02EG028150	32.2061	1.71531	0.49912	3.43667	0.000588912	0.00898679	29	49	56	17	32	5	up
Ibat.Brg_v3.02FG000240	11.8688	-3.55843	1.15468	-3.08175	0.00205784	0.0245462	2	0	3	58	4	4	down
Ibat.Brg_v3.02FG000450	219.098	1.74237	0.165981	10.4974	8.8815e-26	1.93486e-23	315	344	278	81	158	105	up
Ibat.Brg_v3.02FG001680	24.023	3.79555	0.603152	6.29286	3.11673e-10	1.85852e-08	46	37	41	4	5	2	up
Ibat.Brg_v3.02FG002200	67.9555	3.29069	0.345863	9.51445	1.82683e-21	3.02428e-19	110	129	103	18	19	6	up
Ibat.Brg_v3.02FG003230	84.4634	1.05649	0.327841	3.22258	0.00127044	0.0168584	65	164	86	57	65	59	up
Ibat.Brg_v3.02FG003740	66.9388	-1.08644	0.322166	-3.3723	0.000745441	0.0109438	46	54	21	89	105	105	down
Ibat.Brg_v3.02FG003840	48.129	1.45436	0.350687	4.14718	3.36593e-05	0.000782225	88	48	61	22	44	23	up
Ibat.Brg_v3.02FG003910	8.10672	2.77442	0.918409	3.02089	0.00252029	0.0287213	7	21	11	2	3	2	up
Ibat.Brg_v3.02FG004240	13.1006	-2.104	0.750021	-2.80525	0.00502776	0.0484361	6	6	2	8	30	33	down
Ibat.Brg_v3.02FG007590	4.85824	-5.61876	1.51894	-3.69913	0.000216343	0.00389275	0	0	0	8	20	7	down
Ibat.Brg_v3.02FG007780	154.809	-1.32447	0.197051	-6.72143	1.79949e-11	1.26535e-09	98	75	73	185	326	238	down
Ibat.Brg_v3.02FG008430	66.3082	-1.06769	0.299311	-3.56717	0.000360857	0.00596556	32	40	45	83	119	97	down
Ibat.Brg_v3.02FG008710	17.6803	4.1546	0.80855	5.13834	2.77172e-07	1.04595e-05	20	46	26	4	0	2	up
Ibat.Brg_v3.02FG009930	41.3091	1.83452	0.393435	4.66281	3.11916e-06	9.47084e-05	63	77	41	26	20	14	up
Ibat.Brg_v3.02FG011290	12.5673	2.37719	0.726141	3.27372	0.0010614	0.014586	13	33	13	3	7	4	up
Ibat.Brg_v3.02FG012150	16.4249	-2.1972	0.67791	-3.24114	0.00119053	0.0160469	2	8	6	43	25	19	down
Ibat.Brg_v3.02FG012310	11.447	-3.89326	0.953619	-4.08262	4.45306e-05	0.000994516	2	0	2	14	39	22	down
Ibat.Brg_v3.02FG012520	52.2563	-2.39459	0.441465	-5.4242	5.82161e-08	2.51491e-06	14	13	19	47	213	66	down
Ibat.Brg_v3.02FG013680	95.9678	-1.17385	0.287283	-4.08604	4.38798e-05	0.000982764	51	68	45	185	180	84	down
Ibat.Brg_v3.02FG016380	13.5563	-3.22849	0.919671	-3.51049	0.000447284	0.00713204	0	3	4	5	37	40	down
Ibat.Brg_v3.02FG016690	25.6098	-1.39279	0.460033	-3.02757	0.00246525	0.0282436	11	14	14	36	64	29	down
Ibat.Brg_v3.02FG017370	22.7649	-1.47156	0.48939	-3.00694	0.00263895	0.0297772	9	11	13	31	46	35	down
Ibat.Brg_v3.02FG017980	17.936	-4.26079	0.816349	-5.21933	1.79571e-07	7.0772e-06	1	4	0	31	51	34	down
Ibat.Brg_v3.02FG024650	27.9085	1.52593	0.47728	3.19713	0.00138802	0.0180861	26	40	46	20	18	10	up
Ibat.Brg_v3.02FG025100	56.2753	1.22468	0.316857	3.8651	0.000111042	0.00218757	104	62	56	36	47	31	up
Ibat.Brg_v3.02FG025850	1001.82	-2.13255	0.0822496	-25.9278	3.23686e-148	1.43676e-144	374	369	294	1500	2507	1562	down
Ibat.Brg_v3.02FG027590	36.6582	-1.5772	0.425156	-3.70969	0.000207517	0.00376062	27	15	10	68	57	54	down
Ibat.Brg_v3.02FG028860	29.8099	1.57241	0.480077	3.27533	0.00105539	0.0145119	30	43	48	24	18	8	up
Ibat.Brg_v3.02FG029930	44.2401	1.65634	0.432507	3.82962	0.000128344	0.00247891	45	79	61	29	39	7	up
Ibat.Brg_v3.02FG030130	24.5967	1.41928	0.463778	3.06026	0.00221145	0.0259302	36	36	28	17	21	8	up
Ibat.Brg_v3.03AG000880	74.34	1.21009	0.266885	4.53413	5.78403e-06	0.000163919	111	112	69	48	67	38	up
Ibat.Brg_v3.03AG001250	27.4509	-1.46483	0.466652	-3.13901	0.00169519	0.0211091	16	8	16	44	46	42	down
Ibat.Brg_v3.03AG001520	51.6733	1.29386	0.33447	3.8684	0.000109554	0.00216547	72	63	67	38	31	29	up
Ibat.Brg_v3.03AG001980	52.7595	1.00583	0.340439	2.95452	0.00313158	0.0339187	66	94	39	34	54	32	up
Ibat.Brg_v3.03AG002640	58.5024	-4.19844	1.32919	-3.15866	0.00158499	0.0200224	7	6	4	10	40	274	down
Ibat.Brg_v3.03AG002830	23.3863	1.87835	0.646394	2.9059	0.00366203	0.038234	51	31	23	0	26	11	up
Ibat.Brg_v3.03AG002970	20.5555	-2.57018	0.600158	-4.28252	1.84791e-05	0.000462434	11	4	2	36	63	25	down
Ibat.Brg_v3.03AG003040	37.9524	-1.26067	0.380734	-3.31117	0.000929084	0.0131174	24	19	19	67	66	45	down
Ibat.Brg_v3.03AG003890	16.4449	-2.37503	0.831458	-2.85647	0.00428384	0.0429958	9	3	3	40	4	37	down
Ibat.Brg_v3.03AG004070	86.9951	-1.40241	0.298731	-4.69456	2.67178e-06	8.28603e-05	71	38	27	137	216	88	down
Ibat.Brg_v3.03AG005250	228.599	1.02547	0.154287	6.64648	3.00177e-11	2.05381e-09	287	321	246	144	248	127	up
Ibat.Brg_v3.03AG006840	17.2594	-2.5935	0.693509	-3.73968	0.000184258	0.00339543	10	2	2	18	38	42	down
Ibat.Brg_v3.03AG008310	1626.98	-1.67063	0.0663212	-25.1899	5.16405e-140	2.0375e-136	834	764	575	2503	3516	2345	down
Ibat.Brg_v3.03AG009830	78.7471	1.36094	0.403531	3.37258	0.000744686	0.0109362	40	159	109	56	67	28	up
Ibat.Brg_v3.03AG010230	13.9256	-1.84212	0.648922	-2.83874	0.00452923	0.0447815	5	8	4	27	34	14	down
Ibat.Brg_v3.03AG010850	771.972	1.10016	0.0931264	11.8136	3.32029e-32	1.02973e-29	945	1040	925	472	720	472	up
Ibat.Brg_v3.03AG010960	90.1226	-1.57261	0.336707	-4.67054	3.00412e-06	9.17646e-05	53	51	25	115	307	75	down
Ibat.Brg_v3.03AG011350	5.50537	-5.79219	1.49967	-3.86231	0.000112319	0.002206	0	0	0	16	17	5	down
Ibat.Brg_v3.03AG011630	28.4847	1.43009	0.471665	3.032	0.00242938	0.0279272	46	55	18	13	28	13	up
Ibat.Brg_v3.03AG013180	30.963	-2.43628	0.666887	-3.65321	0.000258984	0.00452585	12	8	7	120	26	17	down
Ibat.Brg_v3.03AG014190	7.09142	-3.18435	1.0497	-3.03358	0.0024167	0.0278265	2	2	0	15	17	11	down
Ibat.Brg_v3.03AG014560	12.9081	-2.65182	0.786918	-3.36988	0.000752001	0.0110277	4	4	2	34	37	7	down
Ibat.Brg_v3.03AG014590	15.9569	-2.84146	0.926238	-3.06774	0.00215683	0.0254406	5	4	2	69	4	11	down
Ibat.Brg_v3.03AG015350	12.0989	-6.9234	2.43393	-2.84454	0.00444759	0.0442365	0	0	0	65	4	4	down
Ibat.Brg_v3.03AG019810	20.6591	1.51901	0.509092	2.98376	0.00284727	0.0315767	31	35	20	14	14	8	up
Ibat.Brg_v3.03AG021200	67.4637	-1.05294	0.28838	-3.65122	0.000260995	0.0045565	46	32	43	83	125	97	down
Ibat.Brg_v3.03AG023760	10.0862	2.65552	0.817189	3.24958	0.00115576	0.0156795	12	19	17	2	7	1	up
Ibat.Brg_v3.03AG025290	9.38154	-2.42664	0.823043	-2.94837	0.00319453	0.034422	2	2	4	15	22	16	down
Ibat.Brg_v3.03AG026350	12.7774	2.98	0.952604	3.12827	0.0017584	0.0217336	24	2	34	6	1	2	up
Ibat.Brg_v3.03AG026610	6.50245	-4.12379	1.39397	-2.95831	0.00309336	0.0335815	2	0	0	18	4	15	down
Ibat.Brg_v3.03AG027040	103.36	-1.1931	0.221943	-5.37568	7.62954e-08	3.23107e-06	65	56	54	136	227	130	down
Ibat.Brg_v3.03AG028250	20.8219	-2.10427	0.742009	-2.8359	0.00456966	0.0450559	13	1	8	45	73	6	down
Ibat.Brg_v3.03AG028590	19.5581	-1.77739	0.558287	-3.18366	0.00145427	0.0187435	13	8	4	32	33	34	down
Ibat.Brg_v3.03AG028660	248.594	1.34193	0.180492	7.43482	1.04707e-13	9.40116e-12	339	301	342	102	226	153	up
Ibat.Brg_v3.03AG028920	34.7108	-4.33545	0.70793	-6.12413	9.11833e-10	5.11924e-08	1	5	3	127	40	40	down
Ibat.Brg_v3.03AG030890	275.031	-1.26222	0.146771	-8.59996	7.97414e-18	1.00057e-15	181	169	105	369	593	364	down
Ibat.Brg_v3.03AG031170	56.6132	1.07597	0.322072	3.34077	0.000835478	0.0120234	75	56	80	30	63	33	up
Ibat.Brg_v3.03AG032200	14.1726	3.10814	1.02734	3.02542	0.00248291	0.0283955	72	3	2	4	4	2	up
Ibat.Brg_v3.03AG032540	160.381	1.45845	0.241807	6.03147	1.62477e-09	8.84899e-08	231	176	237	70	97	113	up
Ibat.Brg_v3.03AG033550	8.5828	-2.75139	0.971994	-2.83066	0.00464518	0.0455853	2	0	4	19	28	6	down
Ibat.Brg_v3.03AG033560	508.783	-2.34211	0.125015	-18.7346	2.58749e-78	3.75027e-75	176	157	135	768	1452	734	down
Ibat.Brg_v3.03AG034530	82.5064	-1.00458	0.258483	-3.88646	0.000101718	0.00203427	46	56	50	100	188	94	down
Ibat.Brg_v3.03AG034750	1054.98	-2.48811	0.100079	-24.8614	1.94796e-136	6.28837e-133	344	295	252	1511	2929	1730	down
Ibat.Brg_v3.03AG034760	280.48	-1.30804	0.140694	-9.29705	1.44396e-20	2.25882e-18	156	150	142	361	635	374	down
Ibat.Brg_v3.03AG035010	46.4091	1.96426	0.348824	5.6311	1.7906e-08	8.39397e-07	75	63	66	20	23	20	up
Ibat.Brg_v3.03AG035070	25.6822	2.0942	0.491303	4.26253	2.02124e-05	0.000500344	53	40	25	14	13	6	up
Ibat.Brg_v3.03AG035280	63.7637	1.72657	0.297159	5.81025	6.23783e-09	3.13082e-07	96	93	82	28	35	35	up
Ibat.Brg_v3.03AG036610	19.7101	-2.39724	0.824996	-2.90576	0.00366359	0.0382382	1	1	14	64	22	18	down
Ibat.Brg_v3.03AG036900	9.09554	3.7278	1.20234	3.10045	0.00193227	0.0234021	40	2	8	0	5	0	up
Ibat.Brg_v3.03BG000540	12.1188	-6.91399	1.45254	-4.75992	1.9367e-06	6.19013e-05	0	0	0	10	8	53	down
Ibat.Brg_v3.03BG001590	4.86011	-5.62949	1.59844	-3.52187	0.000428507	0.00687898	0	0	0	8	28	2	down
Ibat.Brg_v3.03BG001990	18.9866	-1.76683	0.538886	-3.27867	0.00104299	0.0143863	10	7	7	33	38	27	down
Ibat.Brg_v3.03BG002050	40.4739	-1.0533	0.376334	-2.79884	0.00512862	0.0491147	21	30	22	67	83	37	down
Ibat.Brg_v3.03BG002380	15.2399	-3.07764	0.787302	-3.9091	9.26397e-05	0.0018739	0	8	1	34	32	24	down
Ibat.Brg_v3.03BG003510	35.6594	-1.48226	0.522265	-2.83813	0.00453785	0.0448356	37	14	4	65	89	30	down
Ibat.Brg_v3.03BG003610	18.897	2.61907	0.819123	3.19741	0.00138669	0.0180789	10	78	5	4	8	6	up
Ibat.Brg_v3.03BG004140	134.936	-1.03615	0.224862	-4.60796	4.0664e-06	0.000120032	76	86	82	227	253	133	down
Ibat.Brg_v3.03BG005370	68.6893	1.05637	0.309164	3.41686	0.000633467	0.0095538	118	71	71	31	63	56	up
Ibat.Brg_v3.03BG005420	35.4572	1.21795	0.37593	3.23984	0.00119597	0.0160928	57	46	36	20	30	22	up
Ibat.Brg_v3.03BG005430	173.478	1.12374	0.193861	5.79666	6.76486e-09	3.37862e-07	252	266	153	103	187	89	up
Ibat.Brg_v3.03BG006750	800.125	-2.2519	0.100977	-22.3011	3.60615e-110	8.53695e-107	253	286	231	1310	1771	1342	down
Ibat.Brg_v3.03BG008980	759.45	-1.34644	0.0864529	-15.5743	1.08896e-54	8.59307e-52	459	403	333	1082	1523	1067	down
Ibat.Brg_v3.03BG009150	55.5207	1.0363	0.340531	3.0432	0.0023408	0.0271241	68	95	46	41	38	40	up
Ibat.Brg_v3.03BG009270	15.9263	-3.30274	0.748393	-4.41312	1.01894e-05	0.000271946	0	4	4	27	54	21	down
Ibat.Brg_v3.03BG010510	8.80119	-5.46398	1.49662	-3.65089	0.000261337	0.00456082	0	1	0	39	4	9	down
Ibat.Brg_v3.03BG010540	39.9609	-1.33389	0.436286	-3.05737	0.00223289	0.0261467	22	18	23	44	136	32	down
Ibat.Brg_v3.03BG011110	21.3062	1.39338	0.498336	2.79607	0.00517279	0.0494507	32	29	25	16	17	7	up
Ibat.Brg_v3.03BG012330	126.975	1.52254	0.227702	6.68654	2.28502e-11	1.58324e-09	154	204	162	52	94	75	up
Ibat.Brg_v3.03BG013810	23.8482	-2.33279	0.761455	-3.06359	0.00218696	0.0256978	8	6	8	8	145	12	down
Ibat.Brg_v3.03BG014070	6.88972	-5.11577	1.43858	-3.55612	0.000376371	0.00617746	0	0	1	6	28	14	down
Ibat.Brg_v3.03BG015050	19.2795	-4.64984	0.884226	-5.25866	1.45111e-07	5.8192e-06	0	0	4	33	73	26	down
Ibat.Brg_v3.03BG015080	29.8315	-8.23392	1.28245	-6.42046	1.35865e-10	8.48646e-09	0	0	0	76	121	19	down
Ibat.Brg_v3.03BG016390	15.991	-3.37307	1.06279	-3.17378	0.00150467	0.0192439	4	3	1	81	4	3	down
Ibat.Brg_v3.03BG019930	107.32	2.7595	0.863946	3.19406	0.00140285	0.0182206	262	105	157	54	34	5	up
Ibat.Brg_v3.03BG024090	18.7919	-2.79504	0.653264	-4.27858	1.88089e-05	0.000469365	5	3	5	50	28	27	down
Ibat.Brg_v3.03BG029190	43.623	-3.85041	0.523453	-7.35579	1.89796e-13	1.65188e-11	4	12	0	64	122	91	down
Ibat.Brg_v3.03BG031390	281.02	1.61478	0.429478	3.75986	0.000170008	0.00316653	429	216	504	126	188	149	up
Ibat.Brg_v3.03BG031560	1700.91	-2.18171	0.0679926	-32.0875	6.58638e-226	5.19739e-222	646	592	477	2610	4371	2570	down
Ibat.Brg_v3.03BG031570	399.505	-2.2496	0.137413	-16.3711	3.0785e-60	2.73294e-57	168	134	88	622	950	661	down
Ibat.Brg_v3.03BG031580	225.505	-1.30965	0.178379	-7.34198	2.10458e-13	1.82277e-11	110	133	116	258	550	306	down
Ibat.Brg_v3.03CG002070	65.0827	1.03299	0.284794	3.62714	0.000286574	0.00490776	92	94	60	36	73	39	up
Ibat.Brg_v3.03CG004580	28.4715	-2.28035	0.596139	-3.82519	0.000130669	0.00251699	8	12	7	93	39	20	down
Ibat.Brg_v3.03CG005100	54.2375	-2.24614	0.511913	-4.38773	1.14541e-05	0.000301286	19	15	18	182	51	47	down
Ibat.Brg_v3.03CG005520	541.379	-2.10568	0.113384	-18.5712	5.49494e-77	7.22687e-74	229	172	168	794	1336	863	down
Ibat.Brg_v3.03CG006130	109.744	1.48451	0.247013	6.00985	1.85693e-09	9.99843e-08	183	127	141	44	110	49	up
Ibat.Brg_v3.03CG006620	48.789	-1.48818	0.396117	-3.75693	0.000172011	0.0031988	21	35	16	41	135	77	down
Ibat.Brg_v3.03CG007400	1603.44	-1.65614	0.0628818	-26.3373	7.17695e-153	3.64076e-149	737	765	644	2396	3610	2263	down
Ibat.Brg_v3.03CG008000	72.9301	-2.22808	0.309274	-7.20424	5.83697e-13	4.82586e-11	18	31	22	141	174	93	down
Ibat.Brg_v3.03CG008550	36.5591	-1.73257	0.424107	-4.08522	4.40359e-05	0.000985637	13	13	20	44	73	69	down
Ibat.Brg_v3.03CG010420	64.5792	1.02237	0.324032	3.15514	0.0016042	0.0202076	63	94	81	53	69	25	up
Ibat.Brg_v3.03CG011460	19.7522	3.99884	0.919058	4.35102	1.35503e-05	0.000349816	15	88	4	1	4	3	up
Ibat.Brg_v3.03CG011520	110.296	-1.01208	0.331003	-3.0576	0.00223117	0.0261309	94	79	36	74	311	146	down
Ibat.Brg_v3.03CG011930	24.6438	-2.31862	0.728938	-3.18082	0.00146861	0.0188779	4	15	4	7	49	77	down
Ibat.Brg_v3.03CG012550	31.6631	2.00592	0.586138	3.42227	0.000621006	0.00938624	105	14	28	12	22	10	up
Ibat.Brg_v3.03CG015170	32.8171	1.43283	0.430206	3.33058	0.000866666	0.0123988	49	33	49	24	18	16	up
Ibat.Brg_v3.03CG016510	65.9102	1.46106	0.321681	4.54196	5.57329e-06	0.000158707	102	63	100	29	46	42	up
Ibat.Brg_v3.03CG017250	21.4522	1.91255	0.535603	3.57083	0.000355848	0.00589098	30	24	38	6	12	12	up
Ibat.Brg_v3.03CG017480	9.25769	5.02219	1.38982	3.61356	0.000302022	0.00512658	8	4	34	0	2	0	up
Ibat.Brg_v3.03CG019810	42.7988	-1.19086	0.413464	-2.88021	0.00397416	0.0406928	44	21	10	70	81	50	down
Ibat.Brg_v3.03CG019940	28.2056	-2.78536	0.749785	-3.71488	0.000203303	0.00369367	6	8	6	16	180	9	down
Ibat.Brg_v3.03CG020060	13.1511	2.93802	0.942363	3.11772	0.00182259	0.0223635	60	6	4	2	7	2	up
Ibat.Brg_v3.03CG022820	104.125	-1.24485	0.234652	-5.30508	1.12621e-07	4.60864e-06	76	55	43	142	245	121	down
Ibat.Brg_v3.03CG022870	70.7799	1.44801	0.320137	4.52309	6.09432e-06	0.000171958	130	71	89	40	72	22	up
Ibat.Brg_v3.03CG024620	71.1849	1.85604	0.326157	5.69062	1.26577e-08	6.07807e-07	101	138	74	17	52	37	up
Ibat.Brg_v3.03CG024860	56.5794	-1.09886	0.308413	-3.56295	0.000366716	0.00604413	34	33	33	73	135	61	down
Ibat.Brg_v3.03CG025040	177.994	1.18438	0.171507	6.90571	4.99542e-12	3.75026e-10	266	212	210	112	169	91	up
Ibat.Brg_v3.03CG025430	14.4681	3.41246	0.771328	4.42413	9.683e-06	0.000260586	32	18	24	0	7	2	up
Ibat.Brg_v3.03CG025710	106.121	1.41623	0.23423	6.04633	1.48183e-09	8.1329e-08	142	163	123	54	71	67	up
Ibat.Brg_v3.03CG026850	215.864	-1.12533	0.16311	-6.8992	5.22976e-12	3.9179e-10	116	154	107	290	432	281	down
Ibat.Brg_v3.03CG027460	22.5972	-2.46959	0.754804	-3.27183	0.00106853	0.0146642	7	3	9	16	131	9	down
Ibat.Brg_v3.03CG029230	81.5779	-1.23724	0.273672	-4.5209	6.15784e-06	0.000173406	41	64	31	121	167	101	down
Ibat.Brg_v3.03CG029410	123.518	-1.01132	0.259974	-3.8901	0.000100201	0.00200684	98	83	50	114	232	208	down
Ibat.Brg_v3.03CG029430	25.6329	-1.71048	0.501985	-3.40743	0.000655787	0.00983611	11	19	4	41	53	38	down
Ibat.Brg_v3.03CG029660	73.0736	-3.87878	0.448447	-8.64936	5.17884e-18	6.62704e-16	11	7	8	62	291	140	down
Ibat.Brg_v3.03CG029920	63.9017	-5.27972	0.60419	-8.73851	2.36211e-18	3.10087e-16	5	2	2	56	238	145	down
Ibat.Brg_v3.03CG030430	54.1517	2.42372	0.38392	6.31309	2.7352e-10	1.64066e-08	106	90	61	29	20	8	up
Ibat.Brg_v3.03CG031360	161.28	-1.09155	0.183852	-5.93711	2.90093e-09	1.51935e-07	92	105	89	218	355	183	down
Ibat.Brg_v3.03DG000430	12.4282	-2.83695	0.868907	-3.26496	0.0010948	0.0149798	0	2	6	12	24	34	down
Ibat.Brg_v3.03DG001980	206.75	1.23705	0.157454	7.85658	3.94774e-15	4.01674e-13	275	273	255	119	176	121	up
Ibat.Brg_v3.03DG002610	29.2152	1.36751	0.453809	3.01342	0.00258325	0.0292756	46	43	30	15	36	8	up
Ibat.Brg_v3.03DG004400	174.867	1.20524	0.242176	4.9767	6.46762e-07	2.2955e-05	227	252	201	71	236	77	up
Ibat.Brg_v3.03DG005100	53.6966	1.03422	0.347376	2.97724	0.00290861	0.0320909	91	81	34	40	48	31	up
Ibat.Brg_v3.03DG006070	157.177	-1.32453	0.23896	-5.54289	2.97513e-08	1.3424e-06	107	55	86	197	280	265	down
Ibat.Brg_v3.03DG006100	305.142	-1.87992	0.149789	-12.5505	3.95054e-36	1.46894e-33	113	127	121	439	794	424	down
Ibat.Brg_v3.03DG006370	80.938	-1.34911	0.258866	-5.21162	1.87197e-07	7.34516e-06	49	39	39	128	176	93	down
Ibat.Brg_v3.03DG007830	23.3804	1.56324	0.491851	3.17827	0.00148158	0.0190125	48	29	22	9	17	14	up
Ibat.Brg_v3.03DG009540	12.537	-6.97339	2.24651	-3.1041	0.0019086	0.0231847	0	0	0	24	2	46	down
Ibat.Brg_v3.03DG016430	12.378	-2.55609	0.801138	-3.19057	0.00141992	0.0184053	3	3	4	19	54	7	down
Ibat.Brg_v3.03DG017220	7.3071	-3.66232	1.16903	-3.13279	0.00173154	0.0214652	0	3	0	20	16	9	down
Ibat.Brg_v3.03DG017700	850.799	-1.00099	0.0797468	-12.5521	3.87042e-36	1.44672e-33	589	516	473	1152	1726	994	down
Ibat.Brg_v3.03DG018180	14.3175	-2.52302	0.788305	-3.20056	0.00137159	0.0179261	8	1	3	8	39	36	down
Ibat.Brg_v3.03DG018470	62.7111	-1.02433	0.319053	-3.21053	0.0013249	0.0174476	46	51	20	75	114	93	down
Ibat.Brg_v3.03DG018780	237.058	1.26791	0.152589	8.30932	9.62514e-17	1.10254e-14	355	308	269	130	185	151	up
Ibat.Brg_v3.03DG019500	1375.61	1.14465	0.0733052	15.6148	5.77031e-55	4.60458e-52	1987	1754	1530	865	1142	864	up
Ibat.Brg_v3.03DG019510	104.407	1.45705	0.231699	6.28853	3.20486e-10	1.90787e-08	176	121	129	60	77	51	up
Ibat.Brg_v3.03DG019850	7.73117	3.03748	0.996385	3.0485	0.00229984	0.0267367	19	16	5	0	4	2	up
Ibat.Brg_v3.03DG021740	9.85501	-2.98481	1.06682	-2.79786	0.00514424	0.0492336	2	0	4	9	59	3	down
Ibat.Brg_v3.03DG021940	33.7179	1.59863	0.434317	3.6808	0.000232504	0.00413431	32	67	41	13	26	18	up
Ibat.Brg_v3.03DG022030	23.4442	-2.1664	0.668257	-3.24187	0.00118746	0.0160178	18	7	0	32	34	56	down
Ibat.Brg_v3.03DG022460	178.432	-4.7278	1.29561	-3.6491	0.000263159	0.00458752	5	9	20	483	781	15	down
Ibat.Brg_v3.03DG023570	23.1703	1.91213	0.511943	3.73504	0.000187685	0.00344874	28	28	43	8	15	10	up
Ibat.Brg_v3.03DG023870	101.963	-1.46662	0.234175	-6.26294	3.77775e-10	2.21916e-08	63	49	40	134	249	135	down
Ibat.Brg_v3.03DG023980	238.806	1.15972	0.147107	7.88349	3.18352e-15	3.27197e-13	334	343	246	141	233	132	up
Ibat.Brg_v3.03DG024280	7.31487	-5.18912	1.61125	-3.22055	0.00127944	0.016962	1	0	0	2	3	36	down
Ibat.Brg_v3.03DG024840	27.2038	-2.04422	0.625285	-3.26925	0.00107832	0.0147785	25	4	2	47	39	54	down
Ibat.Brg_v3.03DG025010	12.2662	2.54259	0.753076	3.37628	0.000734744	0.0108132	32	11	16	6	4	2	up
Ibat.Brg_v3.03DG025290	36.1967	1.14301	0.387059	2.95307	0.0031463	0.0340418	63	48	30	20	31	25	up
Ibat.Brg_v3.03DG025330	8.75696	2.56698	0.864727	2.96854	0.00299215	0.0327481	12	16	13	4	1	3	up
Ibat.Brg_v3.03DG025530	52.831	2.3479	0.362051	6.48498	8.87411e-11	5.70869e-09	78	72	92	20	30	10	up
Ibat.Brg_v3.03DG025980	11.5262	-3.28732	0.878946	-3.74007	0.000183972	0.00339193	4	0	2	12	35	25	down
Ibat.Brg_v3.03DG026070	17.9332	-1.82595	0.636979	-2.86658	0.00414938	0.0420084	3	6	12	41	32	19	down
Ibat.Brg_v3.03DG026250	8.19175	-3.41902	1.1547	-2.96095	0.00306693	0.033366	0	4	0	8	45	6	down
Ibat.Brg_v3.03DG026300	19.1071	1.95029	0.656899	2.96894	0.00298833	0.0327113	26	32	26	0	14	13	up
Ibat.Brg_v3.03EG000510	45.0878	-1.81218	0.538117	-3.36764	0.000758141	0.0110925	19	21	16	19	209	46	down
Ibat.Brg_v3.03EG000950	401.169	1.54435	0.123695	12.4852	8.99287e-36	3.27525e-33	599	579	485	236	302	159	up
Ibat.Brg_v3.03EG001320	28.102	-1.7447	0.445356	-3.91755	8.94546e-05	0.00181568	11	16	9	43	61	42	down
Ibat.Brg_v3.03EG001370	49.9153	-1.87438	0.338717	-5.53376	3.1343e-08	1.40974e-06	26	20	14	80	108	76	down
Ibat.Brg_v3.03EG001720	12.8926	3.73676	1.04586	3.57292	0.000353029	0.0058525	64	4	4	2	2	2	up
Ibat.Brg_v3.03EG001920	81.7547	-2.08704	0.269892	-7.73288	1.05141e-14	1.02853e-12	28	27	31	130	196	123	down
Ibat.Brg_v3.03EG003640	9.84217	2.49424	0.811649	3.07305	0.00211882	0.0250965	26	14	8	2	4	4	up
Ibat.Brg_v3.03EG005090	49.1629	-1.52476	0.415728	-3.6677	0.000244742	0.00431841	21	43	8	74	93	76	down
Ibat.Brg_v3.03EG007780	19.4378	2.02386	0.692617	2.92204	0.00347743	0.0367785	59	23	10	6	21	2	up
Ibat.Brg_v3.03EG009420	110.23	-2.14483	0.723079	-2.96625	0.00301458	0.0329225	72	37	10	269	223	109	down
Ibat.Brg_v3.03EG010450	126.744	-1.05644	0.21719	-4.8641	1.14977e-06	3.86265e-05	85	72	72	135	295	164	down
Ibat.Brg_v3.03EG013670	29.7706	-2.00799	0.61908	-3.2435	0.0011807	0.0159478	4	12	16	30	137	18	down
Ibat.Brg_v3.03EG013840	21.3877	-3.20355	0.636264	-5.03494	4.78005e-07	1.73824e-05	6	6	0	30	68	37	down
Ibat.Brg_v3.03EG015320	110.799	-4.23408	1.30602	-3.24198	0.00118703	0.0160149	1	17	12	248	35	331	down
Ibat.Brg_v3.03EG015600	94.6024	1.15944	0.250442	4.62957	3.66433e-06	0.000109483	159	132	79	64	85	50	up
Ibat.Brg_v3.03EG015710	4.76201	-5.57883	1.5542	-3.58953	0.000331277	0.00555806	0	0	0	16	12	4	down
Ibat.Brg_v3.03EG015790	50.1575	-1.10232	0.335745	-3.28321	0.00102632	0.0142056	41	27	22	59	123	58	down
Ibat.Brg_v3.03EG018660	102.167	1.20874	0.247144	4.89084	1.00405e-06	3.42004e-05	125	136	133	65	109	41	up
Ibat.Brg_v3.03EG019580	20.7016	-1.87521	0.580581	-3.22989	0.00123838	0.0165319	2	12	10	33	42	33	down
Ibat.Brg_v3.03EG020100	46.5866	1.18492	0.365683	3.24029	0.00119406	0.0160823	50	66	61	39	29	25	up
Ibat.Brg_v3.03EG020120	35.0745	-1.43308	0.417517	-3.43238	0.000598306	0.00910277	28	16	10	56	85	37	down
Ibat.Brg_v3.03EG020200	40.7116	-2.29624	0.408946	-5.61502	1.96541e-08	9.15302e-07	16	8	14	79	80	64	down
Ibat.Brg_v3.03EG020400	9.06905	3.42826	0.938456	3.65308	0.000259112	0.00452608	20	12	14	1	1	3	up
Ibat.Brg_v3.03EG020620	17.6691	1.78853	0.597994	2.99089	0.0027817	0.030999	15	30	29	6	9	11	up
Ibat.Brg_v3.03EG022410	12.0546	3.04662	0.815221	3.73717	0.000186101	0.00342229	9	25	24	1	5	3	up
Ibat.Brg_v3.03FG002360	12.228	-3.38358	0.886009	-3.81891	0.000134045	0.00257434	3	1	2	28	46	7	down
Ibat.Brg_v3.03FG002850	10.3591	-2.85732	0.864439	-3.3054	0.000948396	0.0133376	4	0	3	16	36	13	down
Ibat.Brg_v3.03FG003630	37.4749	-1.40359	0.398774	-3.51977	0.000431919	0.00692747	15	16	25	50	89	48	down
Ibat.Brg_v3.03FG004420	66.6933	1.08936	0.364106	2.99188	0.00277265	0.0309126	143	69	49	40	87	26	up
Ibat.Brg_v3.03FG004460	30.9967	1.72094	0.502945	3.42173	0.000622232	0.00939832	43	55	35	24	23	3	up
Ibat.Brg_v3.03FG004470	42.1068	1.92222	0.466686	4.11887	3.80743e-05	0.000869186	54	38	86	26	13	17	up
Ibat.Brg_v3.03FG005440	777.534	1.15423	0.100442	11.4915	1.45522e-30	4.08497e-28	1234	1007	770	530	665	431	up
Ibat.Brg_v3.03FG005470	75.1637	2.04829	0.355333	5.76443	8.19337e-09	4.03812e-07	141	69	123	45	33	19	up
Ibat.Brg_v3.03FG006070	43.3058	-1.10674	0.378443	-2.92446	0.00345055	0.0365868	15	31	29	57	95	51	down
Ibat.Brg_v3.03FG006250	3015.1	-2.11574	0.0558147	-37.9066	0	0	1134	1056	950	4941	6847	4710	down
Ibat.Brg_v3.03FG007240	454.051	1.25589	0.112152	11.1981	4.16372e-29	1.08318e-26	607	628	539	246	380	278	up
Ibat.Brg_v3.03FG007800	129.91	-2.89301	0.272232	-10.627	2.23181e-26	5.0001e-24	25	18	41	204	334	235	down
Ibat.Brg_v3.03FG008850	75.9336	-1.3108	0.27967	-4.68696	2.77299e-06	8.56624e-05	44	35	42	107	190	81	down
Ibat.Brg_v3.03FG008920	41.0318	-1.17715	0.386842	-3.04298	0.00234246	0.0271389	23	36	12	54	80	58	down
Ibat.Brg_v3.03FG009140	94.6692	1.12427	0.365078	3.07954	0.00207323	0.0246758	101	67	179	52	122	39	up
Ibat.Brg_v3.03FG009800	52.2835	-1.32527	0.327373	-4.0482	5.16121e-05	0.00112646	28	24	30	86	96	67	down
Ibat.Brg_v3.03FG009910	124.836	1.31112	0.252396	5.19472	2.05031e-07	7.94833e-06	117	180	187	65	110	69	up
Ibat.Brg_v3.03FG010010	19.1494	2.25175	0.721538	3.12076	0.00180385	0.0221988	71	11	11	10	7	5	up
Ibat.Brg_v3.03FG010150	32.7333	2.89116	0.566102	5.10714	3.27064e-07	1.21868e-05	19	90	49	7	14	6	up
Ibat.Brg_v3.03FG011640	23.2773	-2.62943	0.574061	-4.58041	4.64073e-06	0.00013502	4	9	5	54	62	22	down
Ibat.Brg_v3.03FG011750	132.937	1.30901	0.206418	6.34158	2.27418e-10	1.38045e-08	171	171	179	85	104	68	up
Ibat.Brg_v3.03FG011930	791.035	-1.45473	0.089859	-16.1891	6.02509e-59	5.03414e-56	468	411	306	1133	1820	1024	down
Ibat.Brg_v3.03FG012330	121.192	1.13724	0.28585	3.97844	6.93678e-05	0.00145668	183	93	180	58	103	92	up
Ibat.Brg_v3.03FG012610	44.0364	-1.22368	0.362803	-3.37285	0.00074395	0.0109277	33	28	14	63	105	47	down
Ibat.Brg_v3.03FG012670	8.13368	-3.3387	1.03249	-3.23363	0.00122226	0.0163599	2	0	2	16	13	18	down
Ibat.Brg_v3.03FG013480	17.4839	-1.95035	0.577762	-3.3757	0.000736269	0.0108283	5	10	5	28	40	26	down
Ibat.Brg_v3.03FG018120	63.4101	1.02535	0.289721	3.53908	0.000401518	0.00651641	88	92	58	46	51	42	up
Ibat.Brg_v3.03FG018140	96.7526	1.00329	0.342878	2.92608	0.0034326	0.0364345	195	60	107	54	74	83	up
Ibat.Brg_v3.03FG019990	44.918	-5.62137	1.38856	-4.04836	5.15779e-05	0.00112606	1	3	1	5	206	111	down
Ibat.Brg_v3.03FG021320	64.7764	-1.10224	0.280647	-3.92749	8.58361e-05	0.00175326	40	38	36	83	123	91	down
Ibat.Brg_v3.03FG023390	8.70224	2.60019	0.867578	2.99707	0.00272592	0.030521	14	20	8	2	2	4	up
Ibat.Brg_v3.03FG025220	23.3909	1.43525	0.483033	2.97132	0.00296521	0.0325585	30	35	29	14	12	15	up
Ibat.Brg_v3.03FG026220	26.4981	1.31588	0.443982	2.9638	0.00303861	0.0331341	32	44	29	18	20	13	up
Ibat.Brg_v3.03FG026280	16.028	-2.2208	0.776473	-2.86011	0.00423492	0.0426676	5	7	4	18	82	5	down
Ibat.Brg_v3.03FG026660	50.9296	1.30002	0.320027	4.06222	4.86078e-05	0.00106943	87	66	51	27	47	27	up
Ibat.Brg_v3.03FG027170	488.07	1.40772	0.117994	11.9305	8.20981e-33	2.63828e-30	728	597	638	235	410	265	up
Ibat.Brg_v3.03FG030000	17.268	-2.78573	0.83658	-3.3299	0.000868768	0.0124242	6	0	6	5	67	37	down
Ibat.Brg_v3.03FG030140	162.364	1.99947	0.696305	2.87154	0.00408475	0.041508	74	292	324	47	103	72	up
Ibat.Brg_v3.03FG032030	9.54619	-3.2178	0.929184	-3.46304	0.000534113	0.008266	0	2	3	15	25	18	down
Ibat.Brg_v3.03FG032110	77.5178	-1.5685	0.2727	-5.75173	8.8336e-09	4.34161e-07	35	38	35	135	150	102	down
Ibat.Brg_v3.03FG032170	97.461	1.06825	0.335959	3.17969	0.00147434	0.0189344	215	78	83	87	71	50	up
Ibat.Brg_v3.03FG032370	264.705	1.52239	0.139392	10.9217	9.07978e-28	2.19335e-25	422	356	316	139	193	130	up
Ibat.Brg_v3.03FG032550	133.482	2.25416	0.207585	10.859	1.80797e-27	4.29437e-25	237	196	182	46	72	40	up
Ibat.Brg_v3.03FG032590	42.3443	-1.19548	0.385198	-3.10356	0.00191208	0.023217	18	38	16	63	91	48	down
Ibat.Brg_v3.03FG033270	25.8167	-2.13099	0.51726	-4.11977	3.79245e-05	0.000866043	6	8	12	56	45	36	down
Ibat.Brg_v3.03FG033940	78.0655	-1.06106	0.292507	-3.62749	0.00028619	0.0049071	70	50	24	109	143	103	down
Ibat.Brg_v3.04AG000080	18.4025	-2.28072	0.62683	-3.6385	0.00027423	0.00474673	2	7	8	20	46	37	down
Ibat.Brg_v3.04AG000120	19.0975	-1.80228	0.606416	-2.97202	0.00295845	0.0325096	8	10	6	29	69	12	down
Ibat.Brg_v3.04AG000420	40.4078	2.64881	0.491826	5.38567	7.2177e-08	3.07499e-06	107	74	22	8	21	10	up
Ibat.Brg_v3.04AG000790	9.92994	-4.15586	1.08154	-3.84255	0.000121762	0.0023687	3	0	0	20	22	20	down
Ibat.Brg_v3.04AG001330	7.12912	-3.64481	1.3045	-2.79404	0.00520548	0.0496766	2	0	1	8	45	1	down
Ibat.Brg_v3.04AG002300	17.5931	1.78794	0.596031	2.99975	0.00270203	0.0303061	27	31	18	8	5	12	up
Ibat.Brg_v3.04AG002800	51.1661	-1.32686	0.393602	-3.37107	0.000748763	0.010987	50	16	17	63	96	85	down
Ibat.Brg_v3.04AG003270	28.2618	2.25832	0.454241	4.97163	6.63909e-07	2.35049e-05	47	42	41	9	18	7	up
Ibat.Brg_v3.04AG003460	8.65899	2.57975	0.866535	2.97708	0.00291007	0.032102	10	14	16	2	2	4	up
Ibat.Brg_v3.04AG005670	20.014	1.65366	0.575386	2.87401	0.00405301	0.041274	52	22	14	9	18	7	up
Ibat.Brg_v3.04AG005810	10.5466	-2.21516	0.784658	-2.82309	0.0047563	0.046417	2	2	6	18	21	18	down
Ibat.Brg_v3.04AG006270	30.2583	-2.47009	0.710437	-3.47686	0.000507316	0.00792381	12	8	6	124	22	13	down
Ibat.Brg_v3.04AG006460	9.10883	2.91256	1.01699	2.8639	0.00418457	0.0422803	36	8	4	2	6	0	up
Ibat.Brg_v3.04AG006790	14.9984	-2.87515	0.773136	-3.71881	0.00020016	0.00364404	0	8	2	17	47	28	down
Ibat.Brg_v3.04AG008320	22.1566	-2.92259	0.687152	-4.2532	2.1074e-05	0.000519319	2	6	6	16	41	68	down
Ibat.Brg_v3.04AG008720	17.9555	-5.63554	1.9929	-2.82781	0.00468675	0.0458854	0	2	0	8	7	86	down
Ibat.Brg_v3.04AG008790	2167.05	-1.99231	0.0693666	-28.7215	2.05705e-181	1.12378e-177	816	949	661	3385	5127	3252	down
Ibat.Brg_v3.04AG010270	466.966	-1.00399	0.137048	-7.32586	2.37373e-13	2.0459e-11	327	291	250	612	1116	459	down
Ibat.Brg_v3.04AG010360	4.8225	-4.56886	1.57108	-2.90809	0.00363641	0.038053	1	0	0	15	3	10	down
Ibat.Brg_v3.04AG012430	29.2109	-1.42053	0.496687	-2.86002	0.00423619	0.0426743	21	9	14	54	32	48	down
Ibat.Brg_v3.04AG013060	73.7422	1.18727	0.267477	4.43877	9.04753e-06	0.000245157	87	112	85	47	67	39	up
Ibat.Brg_v3.04AG013210	14.9973	-3.2197	0.981793	-3.27941	0.00104025	0.0143593	4	1	3	5	9	65	down
Ibat.Brg_v3.04AG013410	61.3751	1.03384	0.288429	3.58439	0.000337863	0.00564721	99	74	59	39	63	36	up
Ibat.Brg_v3.04AG014010	44.4481	1.39129	0.451371	3.08236	0.00205368	0.0245253	101	65	21	33	36	15	up
Ibat.Brg_v3.04AG022170	15.8516	2.13905	0.708281	3.02006	0.00252722	0.0287858	26	22	24	0	17	5	up
Ibat.Brg_v3.04AG022730	311.064	-3.66835	0.179093	-20.483	3.05529e-93	5.56377e-90	53	29	44	539	855	563	down
Ibat.Brg_v3.04AG023030	28.9084	-1.44825	0.485514	-2.98292	0.0028551	0.0316432	11	13	18	61	39	36	down
Ibat.Brg_v3.04AG024030	308.097	-1.67237	0.135663	-12.3273	6.4542e-35	2.28048e-32	167	133	111	488	662	434	down
Ibat.Brg_v3.04AG024590	12.4086	-4.4832	1.14962	-3.89974	9.62968e-05	0.00193739	0	3	0	4	58	26	down
Ibat.Brg_v3.04AG025210	32.654	-1.6266	0.557529	-2.91751	0.00352836	0.0371896	16	14	14	26	32	93	down
Ibat.Brg_v3.04AG025220	231.404	-1.01488	0.16843	-6.02556	1.6853e-09	9.11575e-08	154	130	141	261	536	279	down
Ibat.Brg_v3.04AG025880	35.9935	-1.63933	0.475501	-3.44759	0.000565611	0.00868909	7	27	14	49	57	70	down
Ibat.Brg_v3.04AG026220	120.657	-1.36853	0.215341	-6.35517	2.08196e-10	1.27137e-08	74	67	48	151	288	162	down
Ibat.Brg_v3.04AG026400	105.14	1.42472	0.252898	5.63358	1.76504e-08	8.27961e-07	208	123	102	58	77	57	up
Ibat.Brg_v3.04AG026550	58.3558	1.16988	0.306124	3.8216	0.000132591	0.00255055	86	59	78	34	54	34	up
Ibat.Brg_v3.04AG026630	17.2413	-3.16752	0.811649	-3.90258	9.51743e-05	0.00191798	7	2	1	30	82	7	down
Ibat.Brg_v3.04AG026710	66.2499	1.1506	0.293074	3.92597	8.63819e-05	0.00176339	81	87	83	46	45	44	up
Ibat.Brg_v3.04AG026850	21.9237	1.80964	0.571728	3.16521	0.00154973	0.0196785	50	26	21	3	15	15	up
Ibat.Brg_v3.04AG027190	7.34462	-6.22647	1.62709	-3.82674	0.000129849	0.00250323	0	0	0	2	59	2	down
Ibat.Brg_v3.04AG027640	43.4921	-1.53041	0.388857	-3.93567	8.29665e-05	0.00170593	27	12	23	49	114	62	down
Ibat.Brg_v3.04AG029100	25.4985	1.99592	0.653246	3.05538	0.00224773	0.0262743	60	54	6	4	23	10	up
Ibat.Brg_v3.04AG029130	32.5089	-1.30225	0.403618	-3.22644	0.0012534	0.0166854	18	17	17	53	70	35	down
Ibat.Brg_v3.04AG029760	87.4586	1.09251	0.262385	4.16378	3.13026e-05	0.000734183	118	135	82	45	104	47	up
Ibat.Brg_v3.04AG030010	1808.12	-2.83181	0.0868456	-32.6073	3.22685e-233	2.86464e-229	420	397	414	3095	4270	3242	down
Ibat.Brg_v3.04AG030050	37.0796	-1.38873	0.413014	-3.36243	0.000772609	0.011274	17	15	24	37	91	57	down
Ibat.Brg_v3.04AG030180	338.76	-3.90893	0.414322	-9.43451	3.92836e-21	6.35517e-19	28	47	41	614	1287	385	down
Ibat.Brg_v3.04AG030220	32.6787	1.66557	0.416682	3.99723	6.40883e-05	0.00135908	55	35	47	16	19	17	up
Ibat.Brg_v3.04AG030280	265.175	-1.35857	0.152211	-8.92552	4.43626e-19	6.11773e-17	142	160	113	422	570	309	down
Ibat.Brg_v3.04AG031250	19.2218	2.12421	0.573021	3.70703	0.000209706	0.00379544	40	28	21	5	17	4	up
Ibat.Brg_v3.04AG031990	123.621	1.55338	0.29628	5.24294	1.58035e-07	6.28774e-06	245	206	79	77	97	42	up
Ibat.Brg_v3.04AG032510	159.172	1.06843	0.195651	5.46089	4.7374e-08	2.06919e-06	206	234	160	111	121	108	up
Ibat.Brg_v3.04AG032990	26.4004	-2.08496	0.473743	-4.40103	1.07738e-05	0.000285612	11	8	9	35	67	44	down
Ibat.Brg_v3.04AG033320	15.751	-1.69502	0.607014	-2.79239	0.005232	0.049856	12	4	5	23	36	23	down
Ibat.Brg_v3.04AG034720	79.5506	-2.9851	0.405564	-7.36038	1.83393e-13	1.59811e-11	9	34	7	136	150	172	down
Ibat.Brg_v3.04BG000280	10.5266	3.01219	1.04822	2.87362	0.00405798	0.0413187	6	2	39	3	4	1	up
Ibat.Brg_v3.04BG000670	10.22	-3.73016	1.14681	-3.25265	0.00114334	0.0155466	0	4	0	24	4	28	down
Ibat.Brg_v3.04BG001760	43.5951	-1.08562	0.358738	-3.02621	0.00247637	0.0283345	22	37	19	54	93	56	down
Ibat.Brg_v3.04BG001810	96.4554	1.03157	0.233536	4.41717	9.99995e-06	0.000268005	126	111	120	63	84	65	up
Ibat.Brg_v3.04BG001920	7.02131	-4.26719	1.32862	-3.21175	0.0013193	0.0173915	2	0	0	7	33	10	down
Ibat.Brg_v3.04BG003830	16.1782	-3.61525	0.995192	-3.63271	0.000280456	0.00483212	4	3	0	4	17	69	down
Ibat.Brg_v3.04BG004250	16.8733	-3.04726	0.866336	-3.51741	0.000435776	0.00697831	4	2	4	71	18	6	down
Ibat.Brg_v3.04BG004350	878.902	-1.25	0.291918	-4.28202	1.85205e-05	0.000463142	634	450	379	1249	2380	781	down
Ibat.Brg_v3.04BG004800	22.6727	-2.53902	0.680722	-3.72989	0.00019156	0.00351086	14	1	4	64	51	16	down
Ibat.Brg_v3.04BG005520	33.8971	-8.4103	2.34398	-3.58804	0.000333168	0.00558188	0	0	0	6	30	164	down
Ibat.Brg_v3.04BG005770	10.7973	-3.8115	1.17436	-3.2456	0.00117204	0.0158519	2	0	2	5	77	3	down
Ibat.Brg_v3.04BG006200	23.4821	-2.24839	0.526863	-4.26751	1.9767e-05	0.000490686	12	5	6	43	65	27	down
Ibat.Brg_v3.04BG006410	75.1197	-2.14198	0.766153	-2.79576	0.0051778	0.0494723	41	28	11	199	191	35	down
Ibat.Brg_v3.04BG006480	63.6345	-1.43439	0.403158	-3.55788	0.000373859	0.00614191	33	26	36	72	233	44	down
Ibat.Brg_v3.04BG007330	74.082	-3.16021	0.354081	-8.9251	4.45301e-19	6.12893e-17	10	17	14	140	141	151	down
Ibat.Brg_v3.04BG009960	39.3805	-2.03205	0.421995	-4.81533	1.46955e-06	4.8007e-05	16	22	6	53	116	54	down
Ibat.Brg_v3.04BG012060	204.798	-2.25176	0.261526	-8.61006	7.30197e-18	9.19479e-16	72	79	48	197	473	461	down
Ibat.Brg_v3.04BG012560	5.15066	-5.67807	1.63433	-3.47426	0.000512267	0.00798709	0	0	0	2	6	23	down
Ibat.Brg_v3.04BG012710	11.8423	-2.22754	0.790651	-2.81735	0.00484222	0.0470077	7	3	2	16	50	8	down
Ibat.Brg_v3.04BG013510	50.5996	-3.93975	1.22722	-3.21031	0.0013259	0.0174574	12	4	2	133	11	133	down
Ibat.Brg_v3.04BG013590	21.8947	2.29035	0.715294	3.20197	0.00136491	0.0178618	68	13	24	3	24	2	up
Ibat.Brg_v3.04BG014240	55.658	-1.16106	0.364478	-3.18553	0.00144487	0.018664	42	25	29	43	127	94	down
Ibat.Brg_v3.04BG019710	17.7752	1.79293	0.624694	2.8701	0.00410341	0.0416439	33	36	10	13	7	6	up
Ibat.Brg_v3.04BG020840	34.2239	1.33564	0.469479	2.84494	0.00444197	0.0442142	33	76	28	26	18	19	up
Ibat.Brg_v3.04BG022280	59.7537	-1.07737	0.30722	-3.50684	0.000453455	0.00721586	39	40	28	73	100	95	down
Ibat.Brg_v3.04BG023660	112.735	-4.54763	1.33192	-3.41435	0.000639339	0.00963399	7	7	11	486	223	7	down
Ibat.Brg_v3.04BG026840	17.409	-4.22	0.858107	-4.9178	8.75211e-07	3.038e-05	0	5	0	33	64	21	down
Ibat.Brg_v3.04BG026920	7.50333	-5.24723	1.44644	-3.62769	0.000285971	0.00490571	0	0	1	17	33	4	down
Ibat.Brg_v3.04BG027870	41.3377	1.87971	0.45699	4.11323	3.90159e-05	0.000887259	28	78	70	13	34	15	up
Ibat.Brg_v3.04BG028960	12.2746	-3.55586	1.02412	-3.47212	0.000516371	0.00803872	0	0	5	41	29	6	down
Ibat.Brg_v3.04BG029480	32.1944	-2.23142	0.444037	-5.0253	5.02643e-07	1.81575e-05	16	10	6	46	86	51	down
Ibat.Brg_v3.04BG029630	9.20125	-4.65505	1.42106	-3.27575	0.00105382	0.0144959	0	2	0	2	66	6	down
Ibat.Brg_v3.04BG029640	45.8373	1.08926	0.366959	2.96834	0.00299416	0.032762	47	75	51	19	53	30	up
Ibat.Brg_v3.04BG029880	1177.35	-1.06571	0.0702376	-15.173	5.33878e-52	3.8299e-49	756	775	591	1516	2384	1519	down
Ibat.Brg_v3.04BG030150	9.50801	-2.49515	0.827309	-3.01599	0.00256144	0.0290876	4	2	2	14	19	20	down
Ibat.Brg_v3.04BG030790	54.9948	1.27967	0.433091	2.95473	0.0031294	0.0339106	32	132	52	29	48	32	up
Ibat.Brg_v3.04BG030870	67.8527	1.2658	0.296539	4.26859	1.96709e-05	0.000488471	92	116	62	35	71	33	up
Ibat.Brg_v3.04BG031240	461.377	1.02947	0.122171	8.42643	3.56382e-17	4.23957e-15	618	676	439	278	430	316	up
Ibat.Brg_v3.04BG031670	153.065	-1.08822	0.193743	-5.61683	1.94497e-08	9.07566e-07	91	89	90	215	263	213	down
Ibat.Brg_v3.04CG000160	21.0134	-2.58313	0.787345	-3.28081	0.00103511	0.0143057	2	4	10	42	90	4	down
Ibat.Brg_v3.04CG000590	515.345	1.10326	0.116693	9.45435	3.25033e-21	5.30664e-19	702	628	615	338	409	341	up
Ibat.Brg_v3.04CG001400	41.3375	1.25347	0.382339	3.27841	0.00104393	0.0143878	84	42	39	28	35	20	up
Ibat.Brg_v3.04CG001950	10.5061	-2.35802	0.835751	-2.82143	0.00478095	0.0465574	6	4	0	11	38	15	down
Ibat.Brg_v3.04CG003160	12.3509	-2.23377	0.75259	-2.96811	0.00299633	0.0327736	3	6	3	34	19	13	down
Ibat.Brg_v3.04CG005410	23.5098	-1.58362	0.552096	-2.86839	0.00412571	0.0418165	11	15	7	58	43	17	down
Ibat.Brg_v3.04CG005420	10.4518	-2.86798	0.861738	-3.32814	0.000874294	0.0124909	4	1	2	24	14	20	down
Ibat.Brg_v3.04CG006010	71.4458	1.0278	0.26787	3.83693	0.000124581	0.00241477	87	88	89	51	64	43	up
Ibat.Brg_v3.04CG008610	221.9	-1.04423	0.161875	-6.45084	1.11233e-10	7.02824e-09	147	136	120	250	450	315	down
Ibat.Brg_v3.04CG009010	1105.45	-2.15261	0.0838462	-25.6733	2.32292e-145	9.70433e-142	383	441	308	1718	2795	1660	down
Ibat.Brg_v3.04CG009860	16.9329	-1.80681	0.588286	-3.07131	0.00213122	0.0252149	9	6	6	18	39	32	down
Ibat.Brg_v3.04CG011010	202.051	-1.33462	0.415632	-3.21106	0.00132246	0.0174219	94	165	64	384	338	234	down
Ibat.Brg_v3.04CG011030	52.7557	-1.47238	0.319631	-4.60652	4.09463e-06	0.000120764	26	32	20	72	114	77	down
Ibat.Brg_v3.04CG011050	550.098	-2.58196	0.124801	-20.6886	4.3902e-95	8.20506e-92	145	163	129	870	1282	1004	down
Ibat.Brg_v3.04CG011080	7.69447	4.55746	1.29362	3.52304	0.000426634	0.006852	17	6	17	0	0	2	up
Ibat.Brg_v3.04CG011090	69.9648	3.16561	0.952297	3.32418	0.00088679	0.012644	141	19	177	21	12	12	up
Ibat.Brg_v3.04CG011200	35.5124	1.13756	0.40045	2.8407	0.00450148	0.0446065	44	57	36	19	45	15	up
Ibat.Brg_v3.04CG011220	43.9205	-1.40364	0.396094	-3.54371	0.000394541	0.00642373	17	27	22	77	58	69	down
Ibat.Brg_v3.04CG011950	92.2782	-1.01633	0.240857	-4.21963	2.44706e-05	0.000592938	67	55	48	141	158	113	down
Ibat.Brg_v3.04CG012810	42.0916	1.49453	0.370495	4.03387	5.48659e-05	0.00118894	67	63	45	22	43	13	up
Ibat.Brg_v3.04CG014370	4.83285	-5.60737	1.52711	-3.67188	0.000240773	0.00425683	0	0	0	12	17	5	down
Ibat.Brg_v3.04CG014400	25.8513	1.39259	0.46879	2.97062	0.00297201	0.0326131	25	44	34	16	23	10	up
Ibat.Brg_v3.04CG015230	160.043	1.13673	0.185059	6.14253	8.1217e-10	4.58508e-08	257	203	158	89	152	100	up
Ibat.Brg_v3.04CG019410	48.0886	1.19411	0.341807	3.49354	0.000476665	0.00752976	76	63	48	28	32	36	up
Ibat.Brg_v3.04CG020330	45.0572	1.38879	0.347837	3.99264	6.53424e-05	0.00138165	83	58	43	26	34	24	up
Ibat.Brg_v3.04CG021150	171.318	-1.35956	0.172869	-7.86466	3.7009e-15	3.77641e-13	104	87	77	234	376	231	down
Ibat.Brg_v3.04CG022610	10.6379	-4.80489	1.2106	-3.96903	7.21672e-05	0.00150878	0	0	2	13	41	19	down
Ibat.Brg_v3.04CG024480	19.2524	-1.78949	0.62735	-2.85246	0.00433823	0.0434199	17	6	2	43	34	22	down
Ibat.Brg_v3.04CG027200	23.8766	-2.61363	0.6366	-4.10561	4.03256e-05	0.000913824	6	12	1	52	27	49	down
Ibat.Brg_v3.04CG027430	43.7598	-6.35794	2.15768	-2.94666	0.00321224	0.0345867	0	3	0	62	288	2	down
Ibat.Brg_v3.04CG027880	78.9638	-1.83824	0.293013	-6.27359	3.52809e-10	2.0811e-08	50	22	25	118	176	123	down
Ibat.Brg_v3.04CG028170	143.586	-1.21677	0.219103	-5.55342	2.8014e-08	1.26966e-06	114	84	47	186	301	197	down
Ibat.Brg_v3.04CG028180	33.3098	-1.37581	0.404391	-3.40218	0.000668503	0.00998446	21	19	12	58	65	39	down
Ibat.Brg_v3.04CG028370	41.2235	-4.66671	1.53092	-3.0483	0.0023014	0.0267504	0	2	6	116	11	105	down
Ibat.Brg_v3.04CG028450	69.2198	-2.20435	0.304087	-7.24907	4.19634e-13	3.53109e-11	28	23	18	93	170	123	down
Ibat.Brg_v3.04CG030460	47.624	-3.81368	1.22675	-3.10877	0.00187866	0.0229219	4	5	8	225	22	23	down
Ibat.Brg_v3.04CG030990	15.7281	2.65081	0.871354	3.04217	0.00234875	0.0271764	51	2	24	4	11	1	up
Ibat.Brg_v3.04CG031010	130.497	-4.8576	0.769864	-6.30969	2.7959e-10	1.67565e-08	7	9	8	485	252	90	down
Ibat.Brg_v3.04CG031180	44.7462	-4.07519	0.500555	-8.14135	3.90908e-16	4.30424e-14	5	6	3	65	128	94	down
Ibat.Brg_v3.04CG031530	12.8109	-5.11127	1.28377	-3.98147	6.84907e-05	0.00143997	0	2	0	38	6	30	down
Ibat.Brg_v3.04DG001790	41.3187	-1.16218	0.399637	-2.90808	0.00363653	0.038053	22	14	33	63	74	53	down
Ibat.Brg_v3.04DG004970	10.6741	-2.77187	0.96241	-2.88013	0.00397507	0.0406962	0	0	7	23	30	11	down
Ibat.Brg_v3.04DG005390	16.3878	-1.79025	0.604358	-2.96223	0.00305416	0.0332627	5	7	8	26	26	30	down
Ibat.Brg_v3.04DG005650	54.722	-1.62163	0.490134	-3.30855	0.000937816	0.013225	26	31	18	167	54	40	down
Ibat.Brg_v3.04DG005970	26.2074	1.47492	0.446537	3.30302	0.000956482	0.0134274	37	43	28	11	24	13	up
Ibat.Brg_v3.04DG007170	18.3769	-2.46341	0.856827	-2.87503	0.00403986	0.041188	6	8	2	78	14	5	down
Ibat.Brg_v3.04DG007760	34.6883	-1.54748	0.48835	-3.16879	0.00153073	0.0194922	14	27	9	25	109	52	down
Ibat.Brg_v3.04DG008170	40.6906	-1.83835	0.414949	-4.43031	9.40972e-06	0.000254002	20	16	14	57	136	38	down
Ibat.Brg_v3.04DG008720	54.6657	-1.35684	0.337075	-4.02535	5.68899e-05	0.0012262	45	25	17	78	106	80	down
Ibat.Brg_v3.04DG009930	12.1661	-2.38466	0.742177	-3.21306	0.00131327	0.0173298	7	1	3	20	29	20	down
Ibat.Brg_v3.04DG010060	14.416	-1.85889	0.653945	-2.84259	0.00447489	0.0444547	3	8	6	25	23	25	down
Ibat.Brg_v3.04DG010370	5507.18	-2.19638	0.0469619	-46.7693	0	0	1979	1869	1635	8959	12759	8763	down
Ibat.Brg_v3.04DG010620	43.166	-1.15006	0.353561	-3.25279	0.00114277	0.0155418	21	28	25	66	90	47	down
Ibat.Brg_v3.04DG012390	41.6427	1.24122	0.392756	3.16028	0.00157617	0.0199358	73	56	36	19	27	35	up
Ibat.Brg_v3.04DG012410	976.214	1.25598	0.0775144	16.2032	4.78913e-59	4.0491e-56	1388	1361	1087	519	879	565	up
Ibat.Brg_v3.04DG012600	16.8701	2.29331	0.624364	3.67304	0.000239684	0.00424094	39	27	14	9	6	4	up
Ibat.Brg_v3.04DG012840	216.396	-1.55955	0.211642	-7.36883	1.72128e-13	1.50734e-11	131	65	107	315	405	350	down
Ibat.Brg_v3.04DG012860	576.414	-1.98284	0.120711	-16.4264	1.23809e-60	1.11302e-57	277	209	166	840	1286	969	down
Ibat.Brg_v3.04DG013410	19.5586	-2.1453	0.75993	-2.82302	0.00475733	0.046417	12	0	8	58	39	10	down
Ibat.Brg_v3.04DG013680	38.8521	2.16016	0.49529	4.36142	1.29223e-05	0.000335065	25	93	56	15	27	8	up
Ibat.Brg_v3.04DG014330	123.376	1.33492	0.243871	5.47388	4.40289e-08	1.92902e-06	180	215	103	68	87	78	up
Ibat.Brg_v3.04DG016330	77.952	1.00906	0.289991	3.47964	0.000502086	0.00786115	81	138	72	53	83	42	up
Ibat.Brg_v3.04DG016710	62.0447	1.3818	0.344039	4.0164	5.90942e-05	0.00126401	88	77	84	23	79	23	up
Ibat.Brg_v3.04DG017740	42.8342	-1.7442	0.433414	-4.02432	5.71409e-05	0.00123049	16	34	6	61	105	61	down
Ibat.Brg_v3.04DG018260	14.8958	-2.3163	0.733402	-3.15829	0.00158699	0.0200405	8	1	5	23	58	11	down
Ibat.Brg_v3.04DG018830	56.4234	1.09366	0.308073	3.55001	0.000385212	0.00629493	89	63	62	33	46	41	up
Ibat.Brg_v3.04DG023250	100.895	-1.77325	0.280182	-6.32892	2.46891e-10	1.48469e-08	48	45	34	154	156	193	down
Ibat.Brg_v3.04DG023650	150.448	-3.40019	0.239489	-14.1977	9.46393e-46	5.17022e-43	20	26	26	294	398	239	down
Ibat.Brg_v3.04DG023950	26.8474	1.62323	0.51003	3.18262	0.0014595	0.0187848	26	65	23	11	24	11	up
Ibat.Brg_v3.04DG024440	26.5718	2.4938	0.677833	3.67907	0.000234086	0.00415827	104	12	17	9	14	5	up
Ibat.Brg_v3.04DG024960	54.4128	-1.2326	0.335368	-3.67535	0.00023752	0.00421153	37	20	33	72	133	61	down
Ibat.Brg_v3.04DG026330	49.6475	-1.49552	0.352467	-4.24301	2.20541e-05	0.000539911	24	17	30	67	100	78	down
Ibat.Brg_v3.04DG026420	642.547	-1.14514	0.0949387	-12.0619	1.67802e-33	5.54293e-31	428	410	283	858	1348	815	down
Ibat.Brg_v3.04DG026450	30.3095	1.87009	0.475075	3.93642	8.27056e-05	0.00170106	71	44	22	9	22	14	up
Ibat.Brg_v3.04DG026840	189.181	1.87973	0.452668	4.15255	3.28796e-05	0.000766867	318	236	269	59	74	124	up
Ibat.Brg_v3.04DG027990	25.5532	1.78619	0.509818	3.50358	0.000459054	0.007287	55	25	31	7	14	17	up
Ibat.Brg_v3.04DG028120	15.9973	-2.54568	0.911534	-2.79274	0.00522636	0.0498272	1	10	2	53	4	24	down
Ibat.Brg_v3.04DG028760	96.3428	-1.09496	0.2496	-4.38686	1.15001e-05	0.000302382	72	43	56	116	220	118	down
Ibat.Brg_v3.04DG028840	12.1373	-2.25818	0.785296	-2.87558	0.0040328	0.0411482	3	9	0	23	28	17	down
Ibat.Brg_v3.04DG029170	77.4283	1.31199	0.279454	4.69484	2.66817e-06	8.27842e-05	98	89	115	37	68	46	up
Ibat.Brg_v3.04DG029820	41.2949	-1.06912	0.368538	-2.90096	0.00372017	0.0386719	25	35	15	61	81	48	down
Ibat.Brg_v3.04DG030250	77.3903	-2.93281	0.943403	-3.10876	0.00187874	0.0229219	20	29	3	159	308	39	down
Ibat.Brg_v3.04DG030350	23.9381	1.52846	0.486805	3.13978	0.00169074	0.0210808	25	37	35	16	15	10	up
Ibat.Brg_v3.04DG030530	15.8144	-2.71891	0.882403	-3.08126	0.00206125	0.0245662	6	4	2	11	99	4	down
Ibat.Brg_v3.04DG030880	46.499	-1.08363	0.364828	-2.97025	0.00297558	0.0326372	30	23	29	49	78	81	down
Ibat.Brg_v3.04DG030910	266.038	-3.37235	0.194267	-17.3594	1.67511e-67	1.85884e-64	42	56	33	470	837	385	down
Ibat.Brg_v3.04DG031020	17.4445	1.53914	0.544375	2.82735	0.00469353	0.0459455	24	25	23	7	16	8	up
Ibat.Brg_v3.04DG031090	1130.35	-3.53255	0.0955492	-36.971	3.34574e-299	3.96025e-295	191	152	157	1921	3092	2050	down
Ibat.Brg_v3.04DG031800	62.3514	-1.42491	0.350373	-4.06684	4.76559e-05	0.00105273	21	46	27	69	178	76	down
Ibat.Brg_v3.04DG032270	34.6322	-2.35643	0.452424	-5.20846	1.90413e-07	7.46721e-06	12	16	4	49	81	65	down
Ibat.Brg_v3.04DG032960	10.0581	-4.11327	1.20522	-3.41289	0.000642773	0.00967566	0	2	1	41	4	12	down
Ibat.Brg_v3.04DG033720	41.6555	-1.87486	0.377189	-4.9706	6.67456e-07	2.36187e-05	20	16	14	53	117	59	down
Ibat.Brg_v3.04DG034370	21.2148	-1.91949	0.544534	-3.52502	0.000423453	0.00681015	11	9	5	47	44	22	down
Ibat.Brg_v3.04DG035010	96.57	-1.23557	0.275914	-4.47812	7.53048e-06	0.000207534	80	51	32	161	159	128	down
Ibat.Brg_v3.04DG035470	14.6466	-2.01004	0.639794	-3.14169	0.00167975	0.0209806	4	6	6	30	32	17	down
Ibat.Brg_v3.04EG002410	38.9707	-1.46492	0.402115	-3.64302	0.000269456	0.00467663	27	24	8	54	77	61	down
Ibat.Brg_v3.04EG002910	20.9138	1.74669	0.544353	3.20874	0.00133319	0.0175339	26	46	19	9	19	6	up
Ibat.Brg_v3.04EG003830	34.5675	-1.16732	0.398933	-2.92611	0.00343226	0.0364345	16	25	18	38	77	49	down
Ibat.Brg_v3.04EG006830	11.8703	2.04786	0.695916	2.94268	0.00325385	0.0349024	17	22	14	5	4	6	up
Ibat.Brg_v3.04EG006920	125.767	1.12017	0.279644	4.00569	6.18363e-05	0.00131688	216	189	86	56	107	102	up
Ibat.Brg_v3.04EG009480	33.0196	1.18947	0.424183	2.80413	0.00504522	0.0485057	64	43	24	25	27	16	up
Ibat.Brg_v3.04EG009500	36.2093	-1.08858	0.382627	-2.84502	0.0044408	0.0442089	23	20	21	60	62	42	down
Ibat.Brg_v3.04EG009530	18.7117	-2.36955	0.727178	-3.25856	0.00111981	0.0152604	2	11	4	16	91	15	down
Ibat.Brg_v3.04EG009810	33.4819	-1.41849	0.487933	-2.90714	0.00364755	0.038129	24	17	11	39	121	23	down
Ibat.Brg_v3.04EG012970	46.7478	-2.43095	0.48462	-5.0162	5.27037e-07	1.89808e-05	14	17	10	120	131	25	down
Ibat.Brg_v3.04EG013880	2043.22	-2.46179	0.0624177	-39.4406	0	0	614	623	509	3365	4983	3346	down
Ibat.Brg_v3.04EG014170	13.3064	-2.20623	0.674032	-3.27318	0.00106344	0.0146112	4	4	5	24	26	22	down
Ibat.Brg_v3.04EG019780	79.1579	1.10641	0.301946	3.66425	0.000248065	0.00436728	67	109	117	49	71	49	up
Ibat.Brg_v3.04EG024520	9.85022	-2.74286	0.904269	-3.03324	0.00241946	0.0278448	2	2	3	32	17	7	down
Ibat.Brg_v3.04EG025820	71.3876	-1.07754	0.292157	-3.68822	0.000225832	0.00404097	49	45	34	127	115	79	down
Ibat.Brg_v3.04EG026470	635.453	-1.22267	0.125012	-9.78037	1.36711e-22	2.48954e-20	321	450	290	782	1391	870	down
Ibat.Brg_v3.04EG027520	15.1446	-2.07697	0.620982	-3.34466	0.000823843	0.0118752	6	4	6	26	33	23	down
Ibat.Brg_v3.04EG027630	76.5962	1.01695	0.289102	3.51761	0.000435453	0.00697471	98	117	73	52	96	31	up
Ibat.Brg_v3.04EG028570	32.5628	1.89242	0.447347	4.23032	2.33359e-05	0.000568743	40	40	59	9	22	16	up
Ibat.Brg_v3.04EG029110	30.5036	-1.53333	0.428234	-3.58059	0.000342819	0.0057166	17	17	10	35	71	49	down
Ibat.Brg_v3.04EG029190	328.251	-4.21373	0.19744	-21.3419	4.64037e-101	1.02987e-97	48	24	22	555	932	630	down
Ibat.Brg_v3.04EG030650	9.29322	-4.5728	1.27798	-3.57814	0.000346053	0.00575836	0	0	2	33	12	11	down
Ibat.Brg_v3.04EG031890	9.25811	-2.98078	1.04751	-2.84558	0.00443306	0.0441441	5	1	0	18	5	26	down
Ibat.Brg_v3.04EG031990	13.8531	-3.56678	1.0836	-3.2916	0.000996182	0.0138814	4	0	2	3	10	62	down
Ibat.Brg_v3.04EG034000	26.1115	1.43931	0.451572	3.18733	0.00143591	0.018582	40	28	37	16	18	13	up
Ibat.Brg_v3.04EG034390	38.6695	-1.18385	0.371706	-3.1849	0.00144804	0.0186846	22	20	23	52	68	58	down
Ibat.Brg_v3.04EG034530	24.5913	1.30201	0.458293	2.84099	0.00449738	0.044586	29	33	34	12	21	15	up
Ibat.Brg_v3.04EG037640	184.825	-1.37041	0.170137	-8.05472	7.96618e-16	8.5851e-14	100	112	76	257	413	242	down
Ibat.Brg_v3.04EG037890	20.492	1.95194	0.558075	3.49763	0.000469413	0.00743481	28	24	37	8	18	4	up
Ibat.Brg_v3.04EG039020	310.756	1.01758	0.133109	7.64469	2.09442e-14	1.99659e-12	430	386	343	174	335	197	up
Ibat.Brg_v3.04EG040380	127.794	1.08776	0.277609	3.91831	8.91731e-05	0.00181067	146	119	205	60	115	99	up
Ibat.Brg_v3.04EG040430	22.7332	-2.16677	0.705164	-3.07272	0.00212119	0.0251162	6	11	6	79	36	7	down
Ibat.Brg_v3.04EG040780	355.659	-1.21982	0.123312	-9.89214	4.50306e-23	8.48295e-21	208	191	193	470	754	470	down
Ibat.Brg_v3.04EG040860	43.0973	1.35103	0.376895	3.58463	0.000337553	0.00564469	63	79	33	27	30	24	up
Ibat.Brg_v3.04EG041340	7.64846	-6.2558	1.59425	-3.92397	8.71014e-05	0.00177451	0	0	0	40	5	2	down
Ibat.Brg_v3.04FG004460	211.005	1.14792	0.409153	2.80561	0.00502211	0.04839	193	225	362	116	234	109	up
Ibat.Brg_v3.04FG005710	4.85884	-4.60095	1.55982	-2.94967	0.00318118	0.0343146	0	1	0	15	16	2	down
Ibat.Brg_v3.04FG005950	263.386	-1.1838	0.194931	-6.0729	1.25621e-09	6.94286e-08	126	126	186	326	596	336	down
Ibat.Brg_v3.04FG008010	20.2392	-2.55252	0.635534	-4.01635	5.91067e-05	0.00126401	12	3	2	22	70	32	down
Ibat.Brg_v3.04FG014110	32.0514	-3.0781	0.56392	-5.4584	4.80458e-08	2.09398e-06	10	2	7	49	133	30	down
Ibat.Brg_v3.04FG014250	8.38	-4.40569	1.35517	-3.25102	0.00114991	0.0156121	0	0	2	36	9	5	down
Ibat.Brg_v3.04FG015970	210.187	1.00569	0.164441	6.11583	9.60542e-10	5.38229e-08	290	269	225	119	246	121	up
Ibat.Brg_v3.04FG016430	9.69841	-2.29019	0.816825	-2.80377	0.00505084	0.0485334	2	3	4	22	24	9	down
Ibat.Brg_v3.04FG017710	31.9518	-1.17476	0.417039	-2.8169	0.00484896	0.047052	22	17	16	43	84	30	down
Ibat.Brg_v3.04FG017910	64.495	1.16964	0.314615	3.71769	0.000201054	0.00365936	69	98	80	38	76	26	up
Ibat.Brg_v3.04FG019500	163.153	1.10488	0.178521	6.18907	6.05207e-10	3.47187e-08	236	194	189	115	149	87	up
Ibat.Brg_v3.04FG023540	7.30056	-5.19782	1.3965	-3.72204	0.000197618	0.00360421	0	1	0	14	20	14	down
Ibat.Brg_v3.04FG025100	1113.58	-1.05215	0.079139	-13.295	2.47389e-40	1.08454e-37	734	737	553	1374	2401	1387	down
Ibat.Brg_v3.04FG025290	32.8887	-1.35133	0.470527	-2.87196	0.00407936	0.0414757	30	15	8	68	58	32	down
Ibat.Brg_v3.04FG025470	7.20736	-4.28562	1.45979	-2.93578	0.0033271	0.0355656	2	0	0	4	4	32	down
Ibat.Brg_v3.04FG026170	417.06	-1.20031	0.122393	-9.80703	1.05017e-22	1.9272e-20	290	202	213	557	896	533	down
Ibat.Brg_v3.04FG026440	47.7932	-1.04704	0.366455	-2.85721	0.00427384	0.0429197	34	39	15	71	71	69	down
Ibat.Brg_v3.04FG026450	155.927	-1.12669	0.196907	-5.72197	1.05297e-08	5.0976e-07	116	88	71	237	334	164	down
Ibat.Brg_v3.04FG028550	57.8013	1.5914	0.382117	4.1647	3.11759e-05	0.000731623	101	111	36	39	31	25	up
Ibat.Brg_v3.04FG029140	127.909	-1.0686	0.220409	-4.84826	1.24549e-06	4.14112e-05	96	75	60	147	233	199	down
Ibat.Brg_v3.04FG029500	32.8371	1.23498	0.388651	3.17761	0.00148494	0.0190361	43	48	37	21	27	18	up
Ibat.Brg_v3.04FG030040	81.1151	1.12939	0.251545	4.48982	7.12838e-06	0.000197602	116	96	97	57	75	41	up
Ibat.Brg_v3.04FG031600	38.7022	2.17591	0.443122	4.91041	9.08853e-07	3.13791e-05	66	88	27	11	22	15	up
Ibat.Brg_v3.04FG033260	137.823	-1.47519	0.268856	-5.4869	4.09052e-08	1.80552e-06	65	81	57	115	346	239	down
Ibat.Brg_v3.04FG033920	31.4877	1.22857	0.396122	3.1015	0.0019254	0.0233269	42	47	34	18	28	18	up
Ibat.Brg_v3.04FG035510	1040.81	-3.61076	0.115516	-31.2575	1.76402e-214	1.25281e-210	136	145	154	1760	2656	2036	down
Ibat.Brg_v3.04FG035700	71.9277	-4.88971	0.46994	-10.405	2.35348e-25	5.01935e-23	2	5	6	129	231	121	down
Ibat.Brg_v3.04FG035710	60.5857	-1.6924	0.34479	-4.9085	9.17775e-07	3.16256e-05	42	19	20	72	174	81	down
Ibat.Brg_v3.04FG035800	787.47	-1.46208	0.094845	-15.4155	1.28846e-53	9.94635e-51	484	377	312	1117	1623	1154	down
Ibat.Brg_v3.04FG036180	17.0626	1.85007	0.627472	2.94845	0.00319376	0.034419	31	22	21	9	3	11	up
Ibat.Brg_v3.04FG036900	37.2925	1.45671	0.390203	3.7332	0.00018906	0.00347222	65	55	35	20	37	13	up
Ibat.Brg_v3.04FG037330	21.1645	-3.19029	0.794402	-4.01597	5.9202e-05	0.00126566	4	8	0	7	73	54	down
Ibat.Brg_v3.04FG037550	26.6919	1.46478	0.503829	2.90729	0.00364577	0.0381161	59	21	30	17	13	16	up
Ibat.Brg_v3.04FG038040	53.0702	-1.43106	0.375211	-3.81401	0.000136733	0.00262169	36	24	21	84	154	40	down
Ibat.Brg_v3.04FG039830	458.427	-1.0196	0.113047	-9.01924	1.89395e-19	2.70641e-17	269	320	251	589	890	598	down
Ibat.Brg_v3.05AG001910	22.7066	2.06208	0.528287	3.90332	9.48805e-05	0.00191269	25	31	43	10	14	6	up
Ibat.Brg_v3.05AG002300	31.9675	-1.25715	0.446221	-2.81733	0.00484242	0.0470077	23	11	18	47	44	54	down
Ibat.Brg_v3.05AG004110	31.5174	2.14461	0.603317	3.55469	0.000378418	0.00619674	113	24	15	9	22	10	up
Ibat.Brg_v3.05AG004770	17.3652	-4.22041	0.9401	-4.48932	7.14498e-06	0.000197985	3	2	0	31	11	56	down
Ibat.Brg_v3.05AG005980	65.9126	1.81167	0.38307	4.72934	2.25254e-06	7.11003e-05	162	47	81	27	52	23	up
Ibat.Brg_v3.05AG010920	6.47061	-2.98976	1.06542	-2.80619	0.00501315	0.0483151	1	2	1	14	11	12	down
Ibat.Brg_v3.05AG014650	373.657	-1.05461	0.11947	-8.82737	1.07167e-18	1.44148e-16	247	253	178	524	710	469	down
Ibat.Brg_v3.05AG015130	60.5573	-1.01305	0.326258	-3.10507	0.00190231	0.0231341	35	57	21	78	116	80	down
Ibat.Brg_v3.05AG017000	6.55198	3.03017	1.04334	2.90431	0.00368061	0.038373	11	15	7	0	3	2	up
Ibat.Brg_v3.05AG017730	6.77311	-6.08501	1.44415	-4.21356	2.51375e-05	0.000605996	0	0	0	21	16	8	down
Ibat.Brg_v3.05AG017840	49.7559	1.35396	0.424946	3.1862	0.00144155	0.0186268	40	52	98	36	41	18	up
Ibat.Brg_v3.05AG018420	75.0975	-1.28994	0.391614	-3.29392	0.000988017	0.0137856	39	38	43	168	161	38	down
Ibat.Brg_v3.05AG019370	25.1731	-1.62395	0.477168	-3.40331	0.000665755	0.00995408	12	9	13	45	58	27	down
Ibat.Brg_v3.05AG019500	14.3706	2.1687	0.663649	3.26783	0.00108374	0.0148442	21	27	18	2	13	4	up
Ibat.Brg_v3.05AG020180	53.7693	1.37019	0.331401	4.13454	3.5567e-05	0.000820919	99	71	50	24	55	26	up
Ibat.Brg_v3.05AG020420	25.6362	-1.33255	0.463994	-2.87192	0.00407983	0.0414757	20	10	11	39	60	28	down
Ibat.Brg_v3.05AG020930	27.6111	-1.33467	0.437309	-3.05201	0.00227312	0.0265085	17	17	10	34	58	42	down
Ibat.Brg_v3.05AG021390	444.832	1.01509	0.104797	9.68626	3.44944e-22	6.09402e-20	609	593	460	288	454	264	up
Ibat.Brg_v3.05AG021460	220.605	1.13855	0.151719	7.50433	6.17448e-14	5.67285e-12	290	286	265	130	216	125	up
Ibat.Brg_v3.05AG021480	5459.54	-1.01497	0.04155	-24.4276	8.71358e-132	2.6906e-128	3587	3481	2983	7044	11105	6756	down
Ibat.Brg_v3.05AG021680	32.8028	-1.23956	0.408447	-3.03481	0.00240688	0.027736	23	12	19	47	64	44	down
Ibat.Brg_v3.05AG023240	29.5022	2.34972	0.470821	4.99069	6.0165e-07	2.15152e-05	63	37	38	14	10	8	up
Ibat.Brg_v3.05AG023300	50.5267	1.05668	0.36482	2.89645	0.0037741	0.0390895	47	96	47	27	48	36	up
Ibat.Brg_v3.05AG023730	55.0818	1.12747	0.380936	2.95973	0.00307913	0.0334719	59	45	99	29	61	30	up
Ibat.Brg_v3.05AG024820	55.7764	-1.97025	0.32826	-6.00212	1.94764e-09	1.0463e-07	26	18	19	97	111	87	down
Ibat.Brg_v3.05AG025260	25.1866	1.96395	0.596733	3.29117	0.000997733	0.0138912	19	71	22	17	11	6	up
Ibat.Brg_v3.05AG025730	25.6278	1.67686	0.475237	3.52847	0.000417973	0.00674494	54	33	24	9	20	13	up
Ibat.Brg_v3.05AG026190	28.0615	1.55382	0.449489	3.45687	0.000546498	0.00842829	50	44	25	15	26	9	up
Ibat.Brg_v3.05BG001210	1051.28	1.04441	0.106997	9.76108	1.65378e-22	2.98858e-20	1354	1455	1135	557	1223	616	up
Ibat.Brg_v3.05BG002720	331.466	1.14682	0.182562	6.28184	3.34599e-10	1.98192e-08	647	361	289	197	311	195	up
Ibat.Brg_v3.05BG003140	904.368	1.09624	0.0822363	13.3303	1.54209e-40	6.80244e-38	1258	1200	972	596	765	571	up
Ibat.Brg_v3.05BG003500	33.7262	-3.85961	0.568514	-6.78893	1.12965e-11	8.12842e-10	2	6	4	44	88	79	down
Ibat.Brg_v3.05BG004870	1281.24	-1.18297	0.0676227	-17.4936	1.6028e-68	1.80684e-65	767	794	620	1823	2569	1632	down
Ibat.Brg_v3.05BG006690	34.3126	-1.5452	0.428139	-3.60911	0.000307248	0.00520162	9	21	18	45	87	45	down
Ibat.Brg_v3.05BG007260	159.876	1.50667	0.193975	7.76735	8.01445e-15	7.96065e-13	262	229	172	65	126	92	up
Ibat.Brg_v3.05BG007280	83.1587	1.75017	0.26665	6.56355	5.25422e-11	3.48417e-09	121	138	99	28	67	37	up
Ibat.Brg_v3.05BG010630	14.7251	-2.52054	0.811691	-3.1053	0.00190087	0.0231244	1	6	5	9	75	14	down
Ibat.Brg_v3.05BG011830	22.8652	-5.98872	1.71769	-3.4865	0.000489389	0.00769969	0	2	0	83	68	5	down
Ibat.Brg_v3.05BG011850	94.3786	-3.65301	1.0199	-3.58175	0.000341301	0.00569664	13	3	21	268	315	38	down
Ibat.Brg_v3.05BG013010	273.016	1.27299	0.447218	2.84646	0.00442078	0.044059	233	323	478	199	184	143	up
Ibat.Brg_v3.05BG015060	20.1663	-2.48833	0.58666	-4.24153	2.22001e-05	0.000543111	7	4	6	38	63	20	down
Ibat.Brg_v3.05BG016520	25.326	1.81799	0.482778	3.76569	0.000166089	0.00310576	47	39	26	8	24	8	up
Ibat.Brg_v3.05BG016710	8.31557	-3.77496	1.15717	-3.26224	0.00110536	0.0150909	0	0	3	6	29	19	down
Ibat.Brg_v3.05BG017270	100.205	-1.36883	0.247741	-5.52526	3.29005e-08	1.47605e-06	67	52	38	118	209	161	down
Ibat.Brg_v3.05BG018060	48.7667	-2.0332	0.375117	-5.42017	5.95416e-08	2.56437e-06	23	12	18	99	90	69	down
Ibat.Brg_v3.05BG018380	13.7684	3.04221	0.827077	3.67827	0.000234823	0.00416978	6	21	37	4	4	2	up
Ibat.Brg_v3.05BG018540	46.0468	-1.45779	0.348582	-4.18205	2.88888e-05	0.000683893	25	22	21	71	79	72	down
Ibat.Brg_v3.05BG020550	9.04518	-2.86373	0.911031	-3.1434	0.00167	0.0208883	2	2	2	14	13	23	down
Ibat.Brg_v3.05BG022110	8.92278	-2.87187	0.915152	-3.13813	0.00170029	0.0211517	4	0	2	17	22	14	down
Ibat.Brg_v3.05BG023380	26.9751	2.12302	0.550078	3.85949	0.000113622	0.00222975	32	24	61	5	19	11	up
Ibat.Brg_v3.05BG023730	23.805	-1.36316	0.469589	-2.90287	0.0036976	0.0384913	12	13	12	29	59	31	down
Ibat.Brg_v3.05BG023990	56.1284	1.06995	0.341646	3.13175	0.00173768	0.02153	93	66	55	20	62	43	up
Ibat.Brg_v3.05BG024000	155.295	1.02439	0.224692	4.55909	5.1375e-06	0.000147599	215	252	121	82	151	114	up
Ibat.Brg_v3.05BG024810	17.0861	-2.82758	0.918834	-3.07736	0.00208843	0.0248308	1	2	8	72	17	5	down
Ibat.Brg_v3.05BG025540	21.4644	-3.07882	0.840805	-3.66175	0.000250496	0.00440243	6	6	1	88	33	4	down
Ibat.Brg_v3.05BG026170	22.4699	-2.98722	0.603138	-4.95279	7.3156e-07	2.57018e-05	2	8	4	38	77	27	down
Ibat.Brg_v3.05BG026590	63.9463	1.13397	0.286877	3.95282	7.72359e-05	0.00160008	80	83	79	45	49	39	up
Ibat.Brg_v3.05BG026610	211.503	1.04205	0.162115	6.42787	1.29407e-10	8.09736e-09	299	267	226	132	177	152	up
Ibat.Brg_v3.05BG029650	60.8093	-1.5847	0.349422	-4.5352	5.75477e-06	0.000163155	36	24	25	53	161	103	down
Ibat.Brg_v3.05BG031310	62.2923	1.25328	0.359682	3.48441	0.000493223	0.007748	104	106	40	30	42	49	up
Ibat.Brg_v3.05BG031660	26.6433	-1.6343	0.539503	-3.02927	0.00245142	0.0281078	16	8	12	69	44	20	down
Ibat.Brg_v3.05BG032070	17.7741	-2.49494	0.802306	-3.10971	0.00187269	0.0228638	5	5	5	11	106	7	down
Ibat.Brg_v3.05CG001230	13.1088	-3.05865	0.953829	-3.20671	0.00134263	0.0176417	2	6	0	52	17	6	down
Ibat.Brg_v3.05CG001850	8.97662	-3.18435	0.921772	-3.45459	0.000551131	0.00849052	2	2	1	14	27	15	down
Ibat.Brg_v3.05CG003160	145.637	-1.19856	0.198899	-6.02599	1.68081e-09	9.09838e-08	103	91	55	214	303	175	down
Ibat.Brg_v3.05CG005310	15.2461	-2.59384	0.715869	-3.62334	0.000290823	0.00496616	3	4	5	20	65	13	down
Ibat.Brg_v3.05CG009400	29.89	-4.15485	0.661607	-6.27994	3.38694e-10	2.0045e-08	6	2	1	84	80	29	down
Ibat.Brg_v3.05CG011610	98.898	1.34302	0.273873	4.90379	9.40038e-07	3.22831e-05	184	127	92	46	112	41	up
Ibat.Brg_v3.05CG011670	94.0788	1.06856	0.294507	3.6283	0.000285295	0.00489768	121	171	69	67	105	40	up
Ibat.Brg_v3.05CG012480	9.88682	4.26464	1.32682	3.21419	0.00130814	0.0172651	2	2	42	1	0	2	up
Ibat.Brg_v3.05CG012490	11.4624	-2.23659	0.740312	-3.02115	0.0025182	0.0287029	2	5	4	24	24	15	down
Ibat.Brg_v3.05CG012930	69.2193	1.01614	0.304768	3.33413	0.000855662	0.0122642	81	89	85	65	57	31	up
Ibat.Brg_v3.05CG012940	14.1313	-2.14397	0.699001	-3.0672	0.00216078	0.0254751	10	4	1	28	26	22	down
Ibat.Brg_v3.05CG013490	74.3849	-1.06286	0.331102	-3.21006	0.0013271	0.0174699	25	70	38	112	148	82	down
Ibat.Brg_v3.05CG014150	39.0402	-1.8888	0.39319	-4.80379	1.55692e-06	5.05821e-05	12	19	15	54	107	53	down
Ibat.Brg_v3.05CG014170	32.6393	-1.17904	0.404317	-2.91613	0.00354399	0.0373024	20	14	21	42	66	45	down
Ibat.Brg_v3.05CG014280	50.0981	1.57688	0.321842	4.89954	9.60613e-07	3.29101e-05	84	70	56	27	35	23	up
Ibat.Brg_v3.05CG016160	21.4683	-2.33824	0.69965	-3.34202	0.000831725	0.0119743	2	16	2	15	65	45	down
Ibat.Brg_v3.05CG017020	18.0217	-1.89477	0.663115	-2.85737	0.00427166	0.0429057	11	8	3	30	67	9	down
Ibat.Brg_v3.05CG017210	14.7622	-2.38709	0.661267	-3.60988	0.000306338	0.00518743	4	3	6	20	43	23	down
Ibat.Brg_v3.05CG017390	40.2502	1.15753	0.403084	2.87168	0.00408298	0.0414959	37	55	59	16	37	31	up
Ibat.Brg_v3.05CG018640	33.4663	1.61267	0.416359	3.87326	0.000107388	0.00213155	55	39	46	10	29	18	up
Ibat.Brg_v3.05CG019080	22.2323	2.33568	0.574408	4.06623	4.77793e-05	0.00105447	32	24	44	4	8	12	up
Ibat.Brg_v3.05CG020430	50.5253	-1.08043	0.33792	-3.1973	0.0013872	0.0180802	35	36	20	59	88	81	down
Ibat.Brg_v3.05CG020790	18.9245	2.54447	0.889943	2.85913	0.00424799	0.0427365	13	78	2	2	6	10	up
Ibat.Brg_v3.05CG020960	61.3	-1.11163	0.369079	-3.0119	0.00259621	0.0293978	38	17	50	70	118	93	down
Ibat.Brg_v3.05CG020980	87.1409	2.65933	0.278695	9.54208	1.40001e-21	2.33951e-19	135	136	143	19	37	25	up
Ibat.Brg_v3.05CG021090	31.2172	1.27762	0.426986	2.99217	0.00276998	0.0308974	56	30	37	21	20	19	up
Ibat.Brg_v3.05CG021120	31.5259	-1.44944	0.459244	-3.15615	0.00159867	0.0201486	10	26	11	36	65	54	down
Ibat.Brg_v3.05CG022240	235.294	1.07872	0.154083	7.00092	2.54283e-12	1.98235e-10	280	318	284	141	225	147	up
Ibat.Brg_v3.05CG022370	14.3793	-2.6094	0.797375	-3.27249	0.00106603	0.0146408	2	5	4	30	9	35	down
Ibat.Brg_v3.05DG002890	33.579	-1.35714	0.452155	-3.00149	0.00268663	0.0301954	26	13	14	70	67	27	down
Ibat.Brg_v3.05DG005010	649.76	-1.14661	0.106665	-10.7496	5.95336e-27	1.38625e-24	442	395	295	769	1366	915	down
Ibat.Brg_v3.05DG005490	12.3779	-3.34907	1.14839	-2.91632	0.00354186	0.0372988	0	4	2	2	6	57	down
Ibat.Brg_v3.05DG005760	14.6554	-3.18945	0.942862	-3.38273	0.000717689	0.0105916	2	4	2	52	3	23	down
Ibat.Brg_v3.05DG008710	17.904	-2.5993	0.635693	-4.08892	4.3338e-05	0.000972469	2	8	4	24	43	36	down
Ibat.Brg_v3.05DG011410	12.5893	-2.3484	0.783001	-2.99923	0.00270662	0.0303528	2	2	7	34	23	12	down
Ibat.Brg_v3.05DG013460	43.3575	-2.62516	0.409271	-6.41423	1.41534e-10	8.81734e-09	8	10	15	85	98	66	down
Ibat.Brg_v3.05DG014170	124.599	-1.27982	0.243947	-5.2463	1.55185e-07	6.1952e-06	71	64	66	236	228	127	down
Ibat.Brg_v3.05DG014310	11.0164	-2.37432	0.830731	-2.85812	0.00426166	0.0428276	1	8	1	13	26	23	down
Ibat.Brg_v3.05DG014940	22.6144	1.50257	0.533813	2.81479	0.00488093	0.0473105	54	25	17	16	16	8	up
Ibat.Brg_v3.05DG015240	6.62709	-5.04584	1.42627	-3.53779	0.000403491	0.00654544	0	0	1	9	18	16	down
Ibat.Brg_v3.05DG015440	16.3166	2.46284	0.667114	3.69178	0.000222692	0.00399282	49	19	12	5	7	5	up
Ibat.Brg_v3.05DG015460	31.6925	-1.76408	0.513516	-3.4353	0.00059189	0.00902255	14	13	13	77	75	17	down
Ibat.Brg_v3.05DG015700	12.6092	-2.12265	0.728382	-2.9142	0.00356606	0.0374536	4	4	5	9	39	24	down
Ibat.Brg_v3.05DG015860	23.3405	-1.86319	0.509481	-3.65703	0.000255151	0.00447649	8	11	9	36	70	24	down
Ibat.Brg_v3.05DG016900	58.0946	-1.19198	0.350098	-3.40469	0.000662385	0.00991406	53	23	24	102	116	57	down
Ibat.Brg_v3.05DG018360	22.0235	-1.74119	0.553113	-3.14798	0.00164403	0.0206288	9	11	8	25	32	51	down
Ibat.Brg_v3.05DG020270	56.468	-1.39296	0.359204	-3.87791	0.000105357	0.0020971	36	16	34	64	153	71	down
Ibat.Brg_v3.05DG020690	40.991	-2.18359	0.513684	-4.25084	2.12969e-05	0.000523902	17	16	9	52	182	24	down
Ibat.Brg_v3.05DG020800	12.2947	-3.43487	1.0922	-3.14491	0.00166138	0.0207987	4	2	0	57	4	7	down
Ibat.Brg_v3.05DG020910	21.2317	-1.73169	0.589094	-2.93957	0.00328664	0.035206	10	15	3	49	45	17	down
Ibat.Brg_v3.05DG021200	41.9859	-1.6428	0.543013	-3.02534	0.00248355	0.0283983	17	9	29	47	174	23	down
Ibat.Brg_v3.05DG021460	1379.31	1.02622	0.0708375	14.4869	1.46612e-47	8.82408e-45	1822	1881	1454	827	1409	867	up
Ibat.Brg_v3.05DG021480	3727.91	-1.05139	0.045778	-22.9672	9.93005e-117	2.71243e-113	2544	2243	1973	4912	7635	4602	down
Ibat.Brg_v3.05DG022140	27.5063	1.73123	0.477294	3.62719	0.000286526	0.00490776	32	31	51	10	19	14	up
Ibat.Brg_v3.05DG022540	56.7991	1.27241	0.342504	3.71502	0.000203185	0.00369248	53	101	67	33	40	37	up
Ibat.Brg_v3.05DG023630	102.13	1.09916	0.236598	4.64568	3.3895e-06	0.000101872	161	124	104	69	76	70	up
Ibat.Brg_v3.05EG000290	10.6468	-2.92935	1.02908	-2.84658	0.00441922	0.0440495	2	5	0	15	4	36	down
Ibat.Brg_v3.05EG000580	17.9053	3.30903	0.956425	3.45979	0.000540591	0.0083533	2	82	8	5	4	2	up
Ibat.Brg_v3.05EG001120	48.9396	1.2732	0.341207	3.73147	0.000190365	0.00349167	72	53	66	21	43	33	up
Ibat.Brg_v3.05EG002890	91.3577	-1.00073	0.265044	-3.7757	0.000159559	0.00300102	64	63	43	158	140	104	down
Ibat.Brg_v3.05EG003880	863.061	-1.20023	0.0884466	-13.5701	6.0258e-42	2.79707e-39	601	465	397	1215	1683	1156	down
Ibat.Brg_v3.05EG004710	64.4826	1.17035	0.383529	3.05152	0.00227685	0.0265346	86	128	41	26	88	30	up
Ibat.Brg_v3.05EG006880	59.4481	-1.26663	0.437469	-2.89535	0.00378735	0.0391924	33	16	45	64	71	129	down
Ibat.Brg_v3.05EG009370	15.984	-4.88314	1.18194	-4.13145	3.60488e-05	0.000829757	1	2	0	10	116	4	down
Ibat.Brg_v3.05EG010450	99.7927	-1.01556	0.238997	-4.24925	2.14485e-05	0.000526903	68	62	54	158	200	98	down
Ibat.Brg_v3.05EG011670	47.5905	1.04691	0.344016	3.04322	0.00234064	0.0271241	86	51	44	36	43	26	up
Ibat.Brg_v3.05EG012210	27.0661	1.95718	0.604404	3.2382	0.00120285	0.0161608	90	18	18	13	20	6	up
Ibat.Brg_v3.05EG012270	27.7288	-2.16687	0.50349	-4.30369	1.67978e-05	0.000425002	5	15	8	53	74	30	down
Ibat.Brg_v3.05EG015650	6.45158	-4.08862	1.43142	-2.85633	0.00428568	0.0429997	0	2	0	28	6	4	down
Ibat.Brg_v3.05EG016410	29.2551	-1.5937	0.498092	-3.19962	0.00137611	0.0179701	17	16	8	24	56	65	down
Ibat.Brg_v3.05EG016850	120.456	1.01573	0.211024	4.81333	1.48438e-06	4.84247e-05	149	179	122	80	128	66	up
Ibat.Brg_v3.05EG016960	134.597	-1.06187	0.216429	-4.90633	9.27978e-07	3.19307e-05	78	67	94	172	279	169	down
Ibat.Brg_v3.05EG016980	10.2121	2.45957	0.849135	2.89656	0.00377283	0.039082	22	13	14	2	10	0	up
Ibat.Brg_v3.05EG017150	12.6565	2.97503	0.752501	3.95352	7.70102e-05	0.00159733	17	18	26	2	6	2	up
Ibat.Brg_v3.05EG019240	42.9055	-1.90406	0.39437	-4.82812	1.37827e-06	4.52961e-05	28	11	12	78	89	60	down
Ibat.Brg_v3.05EG019450	58.3008	-1.25118	0.298107	-4.1971	2.70357e-05	0.000646271	38	28	30	79	128	74	down
Ibat.Brg_v3.05EG020180	89.5099	-1.26396	0.322355	-3.92101	8.81795e-05	0.0017939	23	72	49	133	189	108	down
Ibat.Brg_v3.05EG021350	20.9095	-1.48921	0.523523	-2.84459	0.0044468	0.0442365	11	13	7	30	60	20	down
Ibat.Brg_v3.05EG022280	89.767	1.03726	0.232142	4.46821	7.88763e-06	0.000215786	128	108	100	57	88	55	up
Ibat.Brg_v3.05EG022720	15.7474	1.85926	0.594574	3.12704	0.00176576	0.0218132	25	26	18	4	10	9	up
Ibat.Brg_v3.05FG000580	18.813	-5.13287	1.65609	-3.09938	0.00193924	0.0234585	1	2	0	9	141	5	down
Ibat.Brg_v3.05FG000900	15.589	-2.83093	1.00939	-2.8046	0.00503796	0.0484906	2	8	1	5	109	3	down
Ibat.Brg_v3.05FG001150	35.327	1.32952	0.400754	3.31755	0.00090812	0.0128706	42	65	34	21	25	21	up
Ibat.Brg_v3.05FG002320	108.691	1.81128	0.609195	2.97323	0.00294687	0.0324074	173	74	210	72	43	40	up
Ibat.Brg_v3.05FG002990	51.2973	1.09808	0.318643	3.44612	0.000568689	0.00871753	78	56	60	32	42	35	up
Ibat.Brg_v3.05FG003300	33.0024	-1.65258	0.411251	-4.01843	5.85872e-05	0.0012557	14	14	16	43	84	46	down
Ibat.Brg_v3.05FG005350	26.5674	-1.70549	0.566534	-3.01039	0.00260915	0.0295113	11	9	14	75	38	19	down
Ibat.Brg_v3.05FG014040	14.0357	3.35834	0.753454	4.45726	8.30133e-06	0.000225799	29	22	20	3	1	4	up
Ibat.Brg_v3.05FG015310	11.7896	-2.21426	0.747046	-2.96401	0.00303654	0.0331166	8	3	1	22	25	18	down
Ibat.Brg_v3.05FG015730	30.9577	-1.30251	0.454673	-2.86471	0.00417388	0.0421902	12	12	24	49	53	43	down
Ibat.Brg_v3.05FG017410	26.4982	-8.05501	2.57935	-3.12289	0.00179087	0.0220582	0	0	0	2	23	131	down
Ibat.Brg_v3.05FG018660	70.5875	1.83225	0.409927	4.46971	7.83252e-06	0.000214526	137	151	31	40	43	22	up
Ibat.Brg_v3.05FG020680	35.342	2.04023	0.59368	3.43658	0.000589098	0.0089877	124	29	15	8	21	18	up
Ibat.Brg_v3.05FG021120	42.7575	-1.56557	0.380907	-4.1101	3.95489e-05	0.000898229	24	27	10	74	80	59	down
Ibat.Brg_v3.05FG021540	22.4123	-2.18637	0.542205	-4.03237	5.5218e-05	0.00119451	11	8	4	32	74	26	down
Ibat.Brg_v3.05FG021720	64.6075	-1.25636	0.333164	-3.771	0.000162592	0.00304757	32	54	21	114	112	77	down
Ibat.Brg_v3.06AG000370	14.0494	2.01804	0.653443	3.08832	0.00201289	0.0241315	13	23	25	5	9	5	up
Ibat.Brg_v3.06AG000410	50.643	1.09016	0.32566	3.34755	0.000815294	0.0117759	61	72	58	40	47	23	up
Ibat.Brg_v3.06AG002040	11.5932	3.69713	1.19811	3.0858	0.00203005	0.0242966	2	2	49	2	4	0	up
Ibat.Brg_v3.06AG004490	11.6447	3.76522	0.918587	4.09893	4.15067e-05	0.000937395	18	20	22	0	6	0	up
Ibat.Brg_v3.06AG006960	45.5086	-1.58474	0.44115	-3.5923	0.000327771	0.00550836	11	37	15	58	73	90	down
Ibat.Brg_v3.06AG007400	10.4881	2.82398	0.921391	3.06491	0.00217732	0.0256143	26	22	5	5	0	3	up
Ibat.Brg_v3.06AG007790	7.79229	-6.27565	1.58796	-3.95201	7.7496e-05	0.00160329	0	0	0	3	4	38	down
Ibat.Brg_v3.06AG009580	20.7938	1.67004	0.597341	2.7958	0.00517722	0.0494723	37	43	11	4	16	14	up
Ibat.Brg_v3.06AG013080	143.964	-1.83334	0.200501	-9.14382	6.02853e-20	8.97581e-18	67	53	55	233	302	218	down
Ibat.Brg_v3.06AG014720	99.1817	1.31673	0.344999	3.8166	0.000135301	0.00259634	102	95	183	33	116	53	up
Ibat.Brg_v3.06AG016090	222.678	1.66974	0.163816	10.1928	2.1358e-24	4.34625e-22	368	279	295	96	171	98	up
Ibat.Brg_v3.06AG017680	8.72103	4.18716	1.11702	3.7485	0.000177892	0.00328837	12	10	22	0	1	2	up
Ibat.Brg_v3.06AG018120	864.253	1.38476	0.0917899	15.0861	1.99796e-51	1.37763e-48	1187	1347	949	494	666	454	up
Ibat.Brg_v3.06AG018360	79.2177	-1.66464	0.30923	-5.38318	7.31826e-08	3.11223e-06	24	44	36	135	130	127	down
Ibat.Brg_v3.06AG018850	24.2629	1.55372	0.514635	3.01906	0.00253559	0.0288586	22	49	29	17	18	7	up
Ibat.Brg_v3.06AG019660	12.2963	-2.48315	0.883982	-2.80904	0.00496888	0.0479665	1	4	5	45	14	7	down
Ibat.Brg_v3.06AG020220	100.241	1.11605	0.266312	4.19078	2.78003e-05	0.000661211	139	165	83	80	93	43	up
Ibat.Brg_v3.06AG021160	13.762	2.12475	0.689073	3.08349	0.00204588	0.0244487	35	15	14	2	10	6	up
Ibat.Brg_v3.06AG022960	43.9735	1.39839	0.470955	2.96927	0.00298506	0.0326906	83	20	72	16	40	27	up
Ibat.Brg_v3.06AG023220	44.2637	-1.59146	0.385192	-4.1316	3.60245e-05	0.000829592	30	24	9	54	113	64	down
Ibat.Brg_v3.06AG023820	19.8065	1.5146	0.541345	2.79784	0.0051445	0.0492336	37	24	22	6	23	8	up
Ibat.Brg_v3.06AG025110	60.578	1.53793	0.348799	4.40923	1.03738e-05	0.000276245	124	77	56	21	65	25	up
Ibat.Brg_v3.06AG025380	366.141	1.68177	0.450488	3.73322	0.000189046	0.00347222	793	609	211	181	247	160	up
Ibat.Brg_v3.06AG025550	136.516	1.25868	0.250282	5.02904	4.92931e-07	1.78703e-05	164	138	220	71	109	89	up
Ibat.Brg_v3.06AG025740	20.0304	-5.65882	1.84248	-3.0713	0.0021313	0.0252149	0	0	2	3	77	58	down
Ibat.Brg_v3.06AG026310	41.0302	1.27855	0.422663	3.02499	0.00248643	0.0284267	43	42	71	34	24	20	up
Ibat.Brg_v3.06AG026460	23.5311	-3.04108	0.655479	-4.63948	3.49282e-06	0.000104693	6	2	6	75	39	22	down
Ibat.Brg_v3.06AG028450	46.6915	-1.38162	0.363448	-3.80141	0.000143873	0.00274231	35	22	16	54	92	80	down
Ibat.Brg_v3.06BG002080	9.4332	-2.75509	0.892093	-3.08835	0.00201274	0.0241315	4	3	0	23	23	10	down
Ibat.Brg_v3.06BG002590	77.1952	-1.16492	0.327712	-3.55472	0.000378381	0.00619674	55	40	38	157	147	58	down
Ibat.Brg_v3.06BG008230	15.6226	2.81625	0.795219	3.54148	0.000397896	0.00646272	49	12	18	1	13	1	up
Ibat.Brg_v3.06BG009440	113.492	-3.86149	1.22548	-3.151	0.00162712	0.0204617	23	12	7	366	382	9	down
Ibat.Brg_v3.06BG012030	178.543	1.07124	0.174448	6.14075	8.21338e-10	4.63074e-08	234	219	215	122	147	115	up
Ibat.Brg_v3.06BG012950	6.52282	-6.01984	1.59297	-3.77901	0.000157454	0.00296927	0	0	0	2	7	30	down
Ibat.Brg_v3.06BG014010	192.683	1.46452	0.166159	8.81396	1.20801e-18	1.61873e-16	256	290	238	101	152	95	up
Ibat.Brg_v3.06BG014330	28.5874	1.59247	0.48753	3.26641	0.00108922	0.0149135	32	62	26	10	17	20	up
Ibat.Brg_v3.06BG014540	27.1928	1.90456	0.476437	3.99751	6.40119e-05	0.00135786	40	34	44	6	22	12	up
Ibat.Brg_v3.06BG015670	49.2537	1.44146	0.374418	3.84987	0.000118178	0.00230768	93	80	33	21	39	30	up
Ibat.Brg_v3.06BG015690	656.006	1.00089	0.101636	9.84779	7.00667e-23	1.30607e-20	867	885	682	460	555	442	up
Ibat.Brg_v3.06BG015720	133.913	1.12081	0.195328	5.7381	9.57473e-09	4.67395e-07	195	162	153	76	121	88	up
Ibat.Brg_v3.06BG015890	13.1329	-7.04822	1.40236	-5.02598	5.0087e-07	1.81119e-05	0	0	0	43	46	4	down
Ibat.Brg_v3.06BG016040	43.9858	1.55134	0.383502	4.04518	5.22827e-05	0.00113934	63	62	57	32	35	10	up
Ibat.Brg_v3.06BG016780	11.0591	3.09197	1.0445	2.96024	0.00307401	0.0334277	0	32	21	2	4	2	up
Ibat.Brg_v3.06BG017280	10.8109	-3.81123	1.21308	-3.14179	0.00167919	0.0209773	2	0	2	2	80	4	down
Ibat.Brg_v3.06BG017340	29.7794	1.52968	0.535581	2.85611	0.00428862	0.0430195	18	70	34	8	27	18	up
Ibat.Brg_v3.06BG019980	42.6288	-3.51745	1.19427	-2.94526	0.00322679	0.0346801	14	4	2	185	45	17	down
Ibat.Brg_v3.06BG021300	18.9809	-1.54751	0.527925	-2.9313	0.00337544	0.0359406	10	10	7	32	38	25	down
Ibat.Brg_v3.06BG022340	31.8671	1.45283	0.464222	3.1296	0.00175047	0.0216481	31	40	55	24	25	9	up
Ibat.Brg_v3.06BG022530	13.5899	2.58685	0.90533	2.85736	0.00427184	0.0429057	58	10	2	3	5	5	up
Ibat.Brg_v3.06BG022690	24.4949	1.88761	0.663109	2.84661	0.00441877	0.0440495	16	14	69	15	14	6	up
Ibat.Brg_v3.06BG025410	5.23707	4.98896	1.61707	3.0852	0.00203417	0.0243252	2	24	3	0	1	0	up
Ibat.Brg_v3.06BG025630	65.7074	-2.75605	0.333979	-8.25215	1.5557e-16	1.7557e-14	14	17	16	93	196	108	down
Ibat.Brg_v3.06BG026240	7.95398	6.57445	1.53417	4.28534	1.82456e-05	0.000457235	1	21	20	0	0	0	up
Ibat.Brg_v3.06BG027260	105.084	1.46783	0.236681	6.2017	5.58552e-10	3.21461e-08	161	133	133	61	63	60	up
Ibat.Brg_v3.06CG000990	36.8017	1.2971	0.423243	3.06467	0.00217913	0.0256271	37	44	61	21	41	13	up
Ibat.Brg_v3.06CG001000	22.9619	1.68483	0.490836	3.43257	0.000597891	0.00909901	30	33	33	9	13	14	up
Ibat.Brg_v3.06CG001790	33.2152	3.68772	0.701959	5.25347	1.49259e-07	5.97541e-06	142	14	25	4	6	6	up
Ibat.Brg_v3.06CG002100	91.1718	1.28135	0.282159	4.54123	5.59258e-06	0.000159192	177	101	87	69	67	42	up
Ibat.Brg_v3.06CG002890	31.0872	-2.00251	0.570093	-3.5126	0.000443738	0.00708822	21	6	8	41	31	81	down
Ibat.Brg_v3.06CG003070	15.6298	-2.94984	0.741646	-3.97742	6.96663e-05	0.00146144	4	4	2	47	21	20	down
Ibat.Brg_v3.06CG003080	24.3165	2.23025	0.788321	2.82911	0.00466769	0.0457586	10	6	84	8	10	10	up
Ibat.Brg_v3.06CG004270	17.2216	-2.47466	0.680734	-3.63528	0.000277678	0.00479471	5	10	0	33	33	30	down
Ibat.Brg_v3.06CG006470	23.2016	-2.00337	0.511017	-3.92036	8.8416e-05	0.00179768	11	10	5	42	42	38	down
Ibat.Brg_v3.06CG006480	148.798	-1.04109	0.18627	-5.58911	2.28232e-08	1.05117e-06	103	96	73	217	297	168	down
Ibat.Brg_v3.06CG007040	145.605	1.58129	0.198727	7.95713	1.76076e-15	1.84166e-13	217	214	178	65	131	58	up
Ibat.Brg_v3.06CG009300	37.1385	-2.68854	0.451831	-5.95032	2.67618e-09	1.40787e-07	13	10	5	67	68	74	down
Ibat.Brg_v3.06CG010680	10.2432	-3.72144	1.1112	-3.34903	0.000810959	0.0117348	1	2	1	45	11	4	down
Ibat.Brg_v3.06CG015750	80.6438	-2.21036	0.785187	-2.81507	0.00487664	0.0472753	23	30	26	28	307	150	down
Ibat.Brg_v3.06CG016090	42.7155	-1.03256	0.356112	-2.89955	0.00373699	0.038791	38	21	20	57	90	50	down
Ibat.Brg_v3.06CG016100	39.9705	-1.58969	0.388004	-4.09711	4.18344e-05	0.0009435	23	11	21	55	88	60	down
Ibat.Brg_v3.06CG017100	34.7404	1.43662	0.490795	2.92713	0.00342106	0.0363337	84	46	17	22	18	21	up
Ibat.Brg_v3.06CG018680	13.5185	-2.11731	0.683135	-3.0994	0.0019391	0.0234585	2	8	4	20	34	21	down
Ibat.Brg_v3.06CG019660	145.675	1.13808	0.222338	5.1187	3.07642e-07	1.15175e-05	171	178	199	77	116	109	up
Ibat.Brg_v3.06CG020220	8.29916	2.55649	0.879734	2.90598	0.00366105	0.0382308	16	9	14	1	3	4	up
Ibat.Brg_v3.06CG022530	48.9114	1.4149	0.436133	3.24419	0.00117786	0.0159185	128	46	32	19	41	31	up
Ibat.Brg_v3.06CG024380	40.1697	-1.35083	0.425699	-3.1732	0.00150768	0.0192651	24	25	15	38	135	40	down
Ibat.Brg_v3.06CG024470	33.5598	-1.35323	0.405413	-3.3379	0.000844135	0.0121308	18	24	11	44	69	50	down
Ibat.Brg_v3.06CG024540	65.9283	-4.14177	1.29327	-3.20255	0.00136218	0.0178425	8	8	4	313	74	8	down
Ibat.Brg_v3.06CG025170	103.493	1.41134	0.242285	5.82515	5.70625e-09	2.87417e-07	164	146	112	39	99	58	up
Ibat.Brg_v3.06DG003170	129.746	1.20552	0.232604	5.18271	2.18685e-07	8.42472e-06	194	147	162	53	144	77	up
Ibat.Brg_v3.06DG004260	7.16563	-2.85894	1.01032	-2.82974	0.00465855	0.0456912	3	2	0	15	21	8	down
Ibat.Brg_v3.06DG004620	24.2156	2.78402	0.699039	3.98264	6.81553e-05	0.00143334	79	7	34	3	10	8	up
Ibat.Brg_v3.06DG004730	67.526	4.38663	0.999137	4.39041	1.13135e-05	0.000298249	204	44	114	4	19	1	up
Ibat.Brg_v3.06DG011490	16.1979	3.61589	0.933739	3.87249	0.000107729	0.00213594	9	8	59	1	7	1	up
Ibat.Brg_v3.06DG011870	20.6875	-4.18014	0.841307	-4.96863	6.74266e-07	2.38241e-05	0	4	2	41	95	11	down
Ibat.Brg_v3.06DG012700	17.6144	-2.84371	0.662277	-4.29383	1.75615e-05	0.000442276	3	5	4	30	65	17	down
Ibat.Brg_v3.06DG018100	9.60839	-5.58642	1.54381	-3.61859	0.000296207	0.00504234	0	0	1	2	7	46	down
Ibat.Brg_v3.06DG018420	13.0841	-3.20944	1.01447	-3.16365	0.00155804	0.0197663	0	4	3	7	86	5	down
Ibat.Brg_v3.06DG021430	56.2481	1.50546	0.461101	3.26491	0.00109498	0.0149798	164	54	26	34	43	23	up
Ibat.Brg_v3.06DG021700	27.6876	2.65659	0.714294	3.71918	0.000199869	0.0036406	114	13	15	4	19	5	up
Ibat.Brg_v3.06DG022980	11.363	-2.43129	0.778527	-3.12294	0.00179054	0.022058	6	2	2	16	20	26	down
Ibat.Brg_v3.06DG022990	8.0973	-3.35409	1.04095	-3.22216	0.0012723	0.01688	2	0	2	8	31	14	down
Ibat.Brg_v3.06DG023050	78.5997	1.40288	0.253193	5.54075	3.01176e-08	1.35807e-06	118	107	93	43	69	36	up
Ibat.Brg_v3.06EG002980	9.66225	-3.63638	1.26145	-2.8827	0.00394278	0.0404297	2	0	2	2	73	2	down
Ibat.Brg_v3.06EG003660	23.3967	1.48024	0.499061	2.96605	0.00301655	0.032939	44	20	32	12	22	9	up
Ibat.Brg_v3.06EG009530	15.2203	1.85739	0.618499	3.00306	0.00267277	0.0300825	29	28	11	7	8	7	up
Ibat.Brg_v3.06EG010380	321.149	-2.36969	0.155241	-15.2646	1.31562e-52	9.73281e-50	91	123	76	490	773	554	down
Ibat.Brg_v3.06EG011360	11.3264	2.48459	0.796748	3.11841	0.00181828	0.0223261	26	12	16	6	6	0	up
Ibat.Brg_v3.06EG011500	13.1117	-2.71955	0.912584	-2.98005	0.00288197	0.0318614	8	0	2	8	70	12	down
Ibat.Brg_v3.06EG012690	21.899	-1.68136	0.515577	-3.26113	0.00110971	0.0151415	11	8	10	28	66	25	down
Ibat.Brg_v3.06EG013850	24.6545	1.6689	0.511168	3.26488	0.00109512	0.0149798	41	43	22	5	18	17	up
Ibat.Brg_v3.06EG015400	686.118	1.33203	0.101542	13.1181	2.59349e-39	1.10958e-36	1062	844	823	420	511	375	up
Ibat.Brg_v3.06EG015410	722.215	1.03196	0.0827638	12.4687	1.10552e-35	4.0058e-33	963	956	779	478	673	452	up
Ibat.Brg_v3.06EG017210	50.9004	-1.02121	0.328679	-3.10702	0.00188985	0.0230258	27	31	34	69	86	71	down
Ibat.Brg_v3.06EG018070	152.096	-1.03819	0.195741	-5.30391	1.1335e-07	4.6345e-06	89	88	97	225	271	188	down
Ibat.Brg_v3.06EG018760	56.9579	-4.94876	1.16032	-4.265	1.999e-05	0.000495528	5	2	3	10	232	152	down
Ibat.Brg_v3.06EG019210	75.4419	1.74659	0.269673	6.47671	9.3745e-11	6.0034e-09	130	118	79	33	52	33	up
Ibat.Brg_v3.06EG019660	206.646	1.29347	0.1786	7.24226	4.41273e-13	3.7044e-11	262	315	236	129	141	126	up
Ibat.Brg_v3.06EG020170	159.858	1.25016	0.193557	6.45888	1.05481e-10	6.70058e-09	260	175	192	83	147	93	up
Ibat.Brg_v3.06EG022080	93.8258	-1.52154	0.254353	-5.98202	2.20391e-09	1.17245e-07	53	36	45	145	173	143	down
Ibat.Brg_v3.06EG022170	38.9672	-1.41377	0.47562	-2.97249	0.00295398	0.0324755	18	20	21	39	149	27	down
Ibat.Brg_v3.06EG023150	56.6193	-1.21657	0.34063	-3.57154	0.000354893	0.00587792	35	44	17	77	94	90	down
Ibat.Brg_v3.06EG023580	324.268	1.18751	0.136095	8.72563	2.64706e-18	3.45578e-16	459	491	313	195	284	191	up
Ibat.Brg_v3.06EG023660	38.0823	-1.09907	0.379006	-2.89986	0.00373327	0.038774	19	25	23	43	92	46	down
Ibat.Brg_v3.06EG023680	78.3692	1.50482	0.364427	4.12929	3.63889e-05	0.000836086	123	170	40	37	67	37	up
Ibat.Brg_v3.06EG023690	36.5246	-1.35712	0.40477	-3.35283	0.000799893	0.0115991	16	16	24	60	82	38	down
Ibat.Brg_v3.06EG023870	18.7645	-2.38445	0.759546	-3.13932	0.00169342	0.0210995	4	9	4	8	102	16	down
Ibat.Brg_v3.06EG025180	8.19574	4.18053	1.10824	3.77222	0.0001618	0.00303674	16	12	15	1	2	0	up
Ibat.Brg_v3.06EG025250	108.544	-1.14947	0.221866	-5.18093	2.20779e-07	8.48807e-06	68	73	48	149	242	125	down
Ibat.Brg_v3.06EG025740	21.9356	2.29238	0.796164	2.87928	0.00398588	0.0407893	8	8	75	10	7	7	up
Ibat.Brg_v3.06FG000290	167.258	-1.28335	0.252644	-5.07968	3.78077e-07	1.39558e-05	92	101	79	180	526	160	down
Ibat.Brg_v3.06FG001830	448.548	1.00127	0.128875	7.76935	7.88909e-15	7.8471e-13	521	581	545	288	394	316	up
Ibat.Brg_v3.06FG003750	1320.65	-2.53797	0.5439	-4.66624	3.06768e-06	9.33047e-05	471	326	292	1479	5928	1167	down
Ibat.Brg_v3.06FG003810	30.785	1.60015	0.454136	3.52351	0.000425879	0.00684141	39	39	49	17	30	7	up
Ibat.Brg_v3.06FG004450	28.614	2.5163	0.488437	5.15174	2.58078e-07	9.78575e-06	65	38	34	12	8	8	up
Ibat.Brg_v3.06FG005130	15.4891	-2.15385	0.737771	-2.9194	0.0035071	0.0370536	2	2	11	21	56	15	down
Ibat.Brg_v3.06FG005570	73.3222	1.12462	0.322863	3.48328	0.000495307	0.00777386	86	142	55	54	55	44	up
Ibat.Brg_v3.06FG006870	48.6983	-1.84811	0.431198	-4.28599	1.81931e-05	0.000456402	6	33	19	66	121	74	down
Ibat.Brg_v3.06FG007470	46.7135	-1.78929	0.369349	-4.84445	1.26964e-06	4.21157e-05	18	30	11	67	115	67	down
Ibat.Brg_v3.06FG007620	14.6911	-2.55257	0.693149	-3.68257	0.000230892	0.00411285	6	2	4	25	50	15	down
Ibat.Brg_v3.06FG009990	22.3961	-3.88314	1.38003	-2.8138	0.00489589	0.0474102	4	2	2	111	11	6	down
Ibat.Brg_v3.06FG010270	20.2873	-2.52151	0.835337	-3.01855	0.00253987	0.0289027	4	3	9	6	18	79	down
Ibat.Brg_v3.06FG011520	39.5123	1.57934	0.392004	4.02888	5.60433e-05	0.00121015	52	51	60	14	40	16	up
Ibat.Brg_v3.06FG013240	12.9225	-3.74739	1.16501	-3.21662	0.00129712	0.0171389	2	1	2	4	99	1	down
Ibat.Brg_v3.06FG013550	22.8838	-1.81303	0.639488	-2.83512	0.00458086	0.0451224	16	10	3	53	16	40	down
Ibat.Brg_v3.06FG013620	80.7325	-1.19359	0.381838	-3.12589	0.00177265	0.0218679	51	43	42	199	84	74	down
Ibat.Brg_v3.06FG014870	72.7646	1.54099	0.274686	5.61001	2.02309e-08	9.38471e-07	118	108	77	37	46	41	up
Ibat.Brg_v3.06FG015320	162.271	1.10292	0.183567	6.00826	1.87523e-09	1.00893e-07	240	208	171	83	161	108	up
Ibat.Brg_v3.06FG015710	281.645	1.21858	0.135576	8.9882	2.51319e-19	3.54845e-17	416	354	325	175	229	165	up
Ibat.Brg_v3.06FG015970	9.98984	-2.22084	0.787469	-2.82022	0.00479904	0.0466824	4	5	1	19	21	15	down
Ibat.Brg_v3.06FG016020	33.2052	1.48496	0.451717	3.28738	0.00101126	0.0140409	38	75	25	19	24	16	up
Ibat.Brg_v3.06FG016030	40.9505	-1.08999	0.378603	-2.87898	0.00398967	0.0408027	30	31	13	67	70	49	down
Ibat.Brg_v3.06FG016490	8.62206	-3.92359	1.34605	-2.91488	0.0035582	0.0373933	1	1	1	1	67	2	down
Ibat.Brg_v3.06FG016910	66.3917	1.40347	0.307513	4.56392	5.02067e-06	0.000144594	67	98	98	35	56	33	up
Ibat.Brg_v3.06FG018000	33.0474	-1.33535	0.438903	-3.04246	0.0023465	0.0271692	15	24	13	50	45	57	down
Ibat.Brg_v3.06FG018310	11.6226	2.22085	0.732313	3.03266	0.00242412	0.0278713	21	17	15	6	2	5	up
Ibat.Brg_v3.06FG018970	110.791	-1.32786	0.222796	-5.96	2.52239e-09	1.3319e-07	57	57	60	169	214	148	down
Ibat.Brg_v3.06FG019700	262.776	-1.08355	0.145394	-7.45252	9.15742e-14	8.2743e-12	175	162	132	396	473	327	down
Ibat.Brg_v3.06FG020500	202.609	1.52348	0.159308	9.56309	1.14291e-21	1.94186e-19	298	311	230	104	157	95	up
Ibat.Brg_v3.06FG020990	59.8146	1.11492	0.348296	3.20107	0.00136919	0.0179046	70	116	45	28	62	40	up
Ibat.Brg_v3.06FG021270	26.5409	-1.42708	0.450283	-3.16929	0.00152813	0.0194669	12	17	11	33	57	41	down
Ibat.Brg_v3.06FG022890	22.9133	-1.93825	0.631507	-3.06925	0.00214596	0.0253539	9	16	2	63	28	25	down
Ibat.Brg_v3.06FG022940	51.9609	-1.20632	0.335355	-3.59715	0.000321722	0.00541823	35	27	26	67	138	52	down
Ibat.Brg_v3.06FG023260	37.2026	-2.24371	0.644392	-3.4819	0.000497872	0.00780721	12	14	10	144	26	20	down
Ibat.Brg_v3.07AG000610	63.8214	-1.51397	0.305323	-4.95858	7.10108e-07	2.50276e-05	23	37	31	99	126	91	down
Ibat.Brg_v3.07AG001280	33.6364	-1.41926	0.44235	-3.20845	0.00133454	0.0175452	19	8	23	43	82	44	down
Ibat.Brg_v3.07AG001450	909.712	1.29419	0.0917174	14.1106	3.26575e-45	1.74386e-42	1247	1199	1128	524	691	546	up
Ibat.Brg_v3.07AG002340	33.6899	-2.19181	0.601889	-3.64155	0.000271006	0.00470009	2	28	4	40	90	60	down
Ibat.Brg_v3.07AG002900	129.111	1.26469	0.262912	4.8103	1.50707e-06	4.90749e-05	208	227	85	83	107	67	up
Ibat.Brg_v3.07AG003100	19.6671	-1.50453	0.533624	-2.81946	0.00481039	0.0467637	6	11	11	32	41	25	down
Ibat.Brg_v3.07AG005840	23.4107	-7.87735	1.25382	-6.28267	3.32817e-10	1.97301e-08	0	0	0	53	68	38	down
Ibat.Brg_v3.07AG007770	25.3957	-1.76889	0.494231	-3.57909	0.000344796	0.00574282	15	7	10	33	47	49	down
Ibat.Brg_v3.07AG007880	5.14223	4.95139	1.68724	2.93462	0.0033396	0.0356606	24	6	0	0	0	1	up
Ibat.Brg_v3.07AG008780	58.9694	1.14159	0.362592	3.14841	0.00164159	0.0206054	124	42	63	38	57	31	up
Ibat.Brg_v3.07AG009890	90.3183	1.19017	0.285736	4.16529	3.10959e-05	0.000730301	163	88	102	50	107	38	up
Ibat.Brg_v3.07AG010320	23.9705	-3.78244	0.81962	-4.61487	3.93346e-06	0.000116592	4	2	3	104	24	12	down
Ibat.Brg_v3.07AG010560	10.3236	-2.44093	0.776657	-3.14287	0.00167301	0.0209148	3	4	2	16	28	16	down
Ibat.Brg_v3.07AG010690	58.978	-1.92646	0.357816	-5.38394	7.28747e-08	3.10285e-06	29	33	8	83	137	97	down
Ibat.Brg_v3.07AG010780	20.3393	-2.19935	0.559804	-3.92879	8.53735e-05	0.00174729	8	4	8	28	44	39	down
Ibat.Brg_v3.07AG011190	483.723	1.73562	0.383993	4.51993	6.18599e-06	0.000173992	1013	398	664	232	277	231	up
Ibat.Brg_v3.07AG011670	125.216	1.21319	0.205261	5.91046	3.41163e-09	1.76857e-07	164	188	135	69	108	78	up
Ibat.Brg_v3.07AG012190	23.2649	-1.50746	0.497456	-3.03033	0.00244284	0.0280411	11	8	14	39	40	34	down
Ibat.Brg_v3.07AG015460	113.148	-1.13181	0.295244	-3.83349	0.000126336	0.00244346	76	77	46	239	168	104	down
Ibat.Brg_v3.07AG015570	76.2493	2.0953	0.377131	5.55589	2.76195e-08	1.25338e-06	157	156	44	30	54	18	up
Ibat.Brg_v3.07AG017100	33.0641	-1.15103	0.406864	-2.82903	0.00466899	0.045762	28	17	13	38	71	47	down
Ibat.Brg_v3.07AG018040	10.0021	4.60598	1.3373	3.44424	0.000572662	0.00876896	52	2	4	0	3	0	up
Ibat.Brg_v3.07AG018110	140.571	-1.38885	0.206438	-6.72768	1.72385e-11	1.21456e-09	82	64	69	216	252	206	down
Ibat.Brg_v3.07AG018460	36.8217	1.84584	0.536536	3.44028	0.000581111	0.0088811	24	93	42	6	24	24	up
Ibat.Brg_v3.07AG020380	28.2186	-1.59673	0.508445	-3.14041	0.00168712	0.0210542	21	14	5	60	39	38	down
Ibat.Brg_v3.07AG021060	21.6052	2.22277	0.698926	3.18027	0.00147138	0.0189067	81	14	10	7	8	10	up
Ibat.Brg_v3.07AG021200	63.4501	-1.00577	0.326935	-3.07635	0.00209552	0.0248869	59	28	32	66	159	74	down
Ibat.Brg_v3.07AG021940	218.025	-1.09438	0.16795	-6.51607	7.21745e-11	4.70002e-09	114	141	129	268	473	277	down
Ibat.Brg_v3.07AG022150	60.6137	-1.22503	0.368267	-3.32647	0.000879524	0.0125505	24	60	18	88	112	84	down
Ibat.Brg_v3.07AG022260	7.72813	-3.17177	1.10008	-2.8832	0.00393651	0.0403771	0	0	4	12	13	19	down
Ibat.Brg_v3.07AG022380	86.398	-1.32676	0.292666	-4.53334	5.8058e-06	0.000164471	73	32	34	102	183	134	down
Ibat.Brg_v3.07AG022800	49.1724	1.74067	0.392777	4.43171	9.34887e-06	0.000252743	80	73	59	8	46	26	up
Ibat.Brg_v3.07AG022820	89.0858	1.95358	0.285579	6.84076	7.8772e-12	5.77932e-10	114	144	130	39	36	44	up
Ibat.Brg_v3.07AG023000	32.5952	-1.94756	0.480442	-4.05368	5.04183e-05	0.00110448	12	22	4	60	58	52	down
Ibat.Brg_v3.07BG000050	19.2284	-2.87354	0.82914	-3.46569	0.000528873	0.00819741	3	8	2	66	47	3	down
Ibat.Brg_v3.07BG000350	28.9139	1.41111	0.418856	3.36896	0.000754518	0.0110532	38	41	37	17	21	15	up
Ibat.Brg_v3.07BG001320	69.9377	-3.11669	0.353531	-8.81588	1.1875e-18	1.59425e-16	7	21	12	139	181	105	down
Ibat.Brg_v3.07BG001440	52.7509	-1.13496	0.35671	-3.18175	0.0014639	0.0188277	19	34	37	65	129	59	down
Ibat.Brg_v3.07BG001500	53.9027	1.39513	0.331334	4.21063	2.54657e-05	0.00061266	65	73	77	24	56	24	up
Ibat.Brg_v3.07BG001620	105.698	-1.27994	0.340225	-3.76202	0.000168543	0.00314337	70	66	38	236	209	65	down
Ibat.Brg_v3.07BG002470	31.424	2.92042	0.69395	4.20841	2.57178e-05	0.000617889	129	28	9	9	14	3	up
Ibat.Brg_v3.07BG002620	25.6841	1.26722	0.453442	2.79467	0.00519527	0.0495925	41	38	23	14	18	18	up
Ibat.Brg_v3.07BG003730	51.9831	1.13846	0.356869	3.19013	0.00142209	0.0184267	61	86	53	19	65	31	up
Ibat.Brg_v3.07BG004110	32.0222	-2.28366	0.48794	-4.6802	2.86592e-06	8.82261e-05	5	15	10	35	81	64	down
Ibat.Brg_v3.07BG005300	22.9705	-2.79477	0.834255	-3.35002	0.000808045	0.0116974	3	9	4	101	10	11	down
Ibat.Brg_v3.07BG006000	46.3465	-1.30176	0.461355	-2.82159	0.00477857	0.046547	26	13	34	55	158	32	down
Ibat.Brg_v3.07BG012080	13.4931	-2.8465	0.740924	-3.84182	0.000122126	0.00237367	1	4	4	18	38	25	down
Ibat.Brg_v3.07BG014630	8.75514	-6.4455	1.45745	-4.42244	9.75938e-06	0.000262244	0	0	0	32	6	15	down
Ibat.Brg_v3.07BG017220	979.929	-2.07216	0.0826646	-25.067	1.13861e-138	4.25602e-135	376	350	320	1475	2332	1560	down
Ibat.Brg_v3.07BG018560	12.3277	-2.08016	0.716543	-2.90305	0.00369543	0.0384767	5	4	4	23	16	24	down
Ibat.Brg_v3.07BG018760	814.738	-1.2523	0.0877917	-14.2644	3.645e-46	2.08764e-43	523	424	396	1182	1761	981	down
Ibat.Brg_v3.07BG019980	139.695	1.26078	0.205552	6.1336	8.59107e-10	4.83469e-08	242	179	135	86	128	68	up
Ibat.Brg_v3.07BG020210	358.124	1.22422	0.125328	9.76807	1.5436e-22	2.7966e-20	486	480	427	186	349	202	up
Ibat.Brg_v3.07BG020290	12.7416	-2.45915	0.825647	-2.97845	0.00289711	0.031984	2	8	1	12	19	37	down
Ibat.Brg_v3.07CG001980	57.5276	-2.07181	0.490256	-4.22597	2.37914e-05	0.000578652	23	17	21	186	79	35	down
Ibat.Brg_v3.07CG002100	633.783	-1.90217	0.100561	-18.9156	8.47904e-80	1.28124e-76	264	240	238	1062	1456	873	down
Ibat.Brg_v3.07CG002350	122.201	-2.27105	0.224108	-10.1337	3.91371e-24	7.85175e-22	42	42	33	210	315	169	down
Ibat.Brg_v3.07CG003560	32.8025	1.88186	0.4213	4.4668	7.93992e-06	0.000216715	50	63	32	16	18	13	up
Ibat.Brg_v3.07CG004110	87.9476	1.39998	0.250864	5.58064	2.39631e-08	1.1001e-06	143	99	112	46	68	49	up
Ibat.Brg_v3.07CG005430	7.90031	-3.31438	1.13325	-2.92468	0.00344813	0.0365665	2	0	2	19	32	2	down
Ibat.Brg_v3.07CG005830	7.61515	-5.28641	1.5237	-3.46945	0.000521527	0.00810124	1	0	0	8	51	2	down
Ibat.Brg_v3.07CG007520	23.165	-2.56248	0.660297	-3.88081	0.000104111	0.00207462	10	6	3	78	28	20	down
Ibat.Brg_v3.07CG007660	10.1063	3.32608	1.18648	2.80332	0.00505796	0.0485885	2	1	42	2	2	2	up
Ibat.Brg_v3.07CG010550	15.8643	-2.25136	0.752597	-2.99145	0.00277657	0.0309466	5	4	6	10	20	51	down
Ibat.Brg_v3.07CG010710	45.2025	-1.58166	0.50081	-3.15821	0.00158739	0.0200421	24	23	16	72	28	104	down
Ibat.Brg_v3.07CG011130	84.9281	1.14045	0.260687	4.37477	1.21559e-05	0.00031715	118	88	116	51	86	45	up
Ibat.Brg_v3.07CG014040	11.0832	-3.54017	1.12736	-3.14022	0.00168821	0.0210641	2	2	1	8	77	1	down
Ibat.Brg_v3.07CG018620	116.333	1.39544	0.225677	6.18335	6.27558e-10	3.59429e-08	185	179	110	74	83	58	up
Ibat.Brg_v3.07CG019010	56.3393	-2.11899	0.414046	-5.11776	3.09193e-07	1.15573e-05	22	28	10	81	209	48	down
Ibat.Brg_v3.07CG019290	1281.88	-1.73705	0.0768469	-22.6041	3.94948e-113	1.03886e-109	654	583	420	1872	2943	1892	down
Ibat.Brg_v3.07CG020160	50.9237	1.8312	0.370467	4.94296	7.6947e-07	2.69334e-05	80	80	63	14	52	15	up
Ibat.Brg_v3.07CG021310	6.21595	-5.98784	1.60565	-3.72923	0.000192064	0.00351815	0	0	0	4	46	2	down
Ibat.Brg_v3.07DG000220	10.8604	2.40881	0.802263	3.00251	0.0026776	0.0301177	34	10	9	4	6	2	up
Ibat.Brg_v3.07DG000910	17.7123	1.95468	0.689844	2.83351	0.00460404	0.0452754	25	18	34	2	23	3	up
Ibat.Brg_v3.07DG000930	10.2696	2.34716	0.816168	2.87582	0.00402974	0.0411254	15	13	19	5	7	0	up
Ibat.Brg_v3.07DG001160	58.2645	-1.19456	0.377746	-3.16234	0.00156506	0.0198342	24	21	50	88	131	60	down
Ibat.Brg_v3.07DG002800	7.13191	-3.63482	1.22656	-2.96343	0.00304233	0.0331696	2	0	1	17	30	2	down
Ibat.Brg_v3.07DG004620	10.8064	3.16032	0.996615	3.17105	0.00151887	0.0193802	8	6	36	2	6	0	up
Ibat.Brg_v3.07DG005290	13.0972	-2.1271	0.750046	-2.83596	0.00456878	0.0450559	2	4	7	26	14	26	down
Ibat.Brg_v3.07DG005490	12.2455	2.4773	0.86166	2.87503	0.00403992	0.041188	42	12	7	7	6	0	up
Ibat.Brg_v3.07DG006030	14.3318	-1.95176	0.691899	-2.82088	0.00478922	0.0466187	3	5	8	12	49	21	down
Ibat.Brg_v3.07DG006330	18.4909	2.11081	0.700979	3.01123	0.00260192	0.0294383	20	58	8	3	12	9	up
Ibat.Brg_v3.07DG006850	29.8578	-1.65268	0.586418	-2.81826	0.00482849	0.046911	22	12	7	15	50	81	down
Ibat.Brg_v3.07DG006930	11.9462	-2.87563	0.773821	-3.71614	0.000202289	0.00367818	2	4	2	23	35	15	down
Ibat.Brg_v3.07DG007810	27.9339	2.19181	0.686772	3.19147	0.0014155	0.0183548	110	18	9	7	21	8	up
Ibat.Brg_v3.07DG008470	14.2349	2.52224	0.68734	3.66956	0.000242965	0.00429024	14	22	29	5	5	4	up
Ibat.Brg_v3.07DG008500	126.299	-1.21782	0.2159	-5.64069	1.69368e-08	7.97649e-07	76	75	61	142	306	166	down
Ibat.Brg_v3.07DG009540	17.1421	-4.98509	1.08766	-4.58331	4.57671e-06	0.000133541	2	1	0	38	83	5	down
Ibat.Brg_v3.07DG009640	9.51701	3.27912	1.14906	2.85373	0.0043209	0.0432933	46	4	2	4	2	0	up
Ibat.Brg_v3.07DG010230	10.107	-2.62335	0.843927	-3.10851	0.00188033	0.0229374	4	2	2	17	39	8	down
Ibat.Brg_v3.07DG011880	13.437	-2.37718	0.712949	-3.33428	0.000855193	0.0122599	6	1	5	27	34	16	down
Ibat.Brg_v3.07DG011910	55.7558	-2.5022	0.4791	-5.2227	1.76329e-07	6.96489e-06	8	23	15	155	133	35	down
Ibat.Brg_v3.07DG012430	41.1741	-1.56504	0.458663	-3.41218	0.000644454	0.00969119	25	18	15	41	53	100	down
Ibat.Brg_v3.07DG013240	49.5288	-2.32143	0.391235	-5.9336	2.96356e-09	1.54987e-07	22	8	16	61	144	82	down
Ibat.Brg_v3.07DG018180	217.286	-1.01998	0.15931	-6.40253	1.52821e-10	9.48717e-09	125	136	135	279	434	275	down
Ibat.Brg_v3.07DG019710	48.7854	-1.71755	0.361773	-4.74759	2.05854e-06	6.55007e-05	22	27	15	57	143	65	down
Ibat.Brg_v3.07DG019960	32.7996	2.5208	0.559447	4.50587	6.61012e-06	0.000184532	33	38	78	5	26	5	up
Ibat.Brg_v3.07DG019970	94.8078	-1.04757	0.241612	-4.33575	1.45262e-05	0.000372034	56	54	60	134	164	127	down
Ibat.Brg_v3.07DG020980	6.71407	3.99532	1.29922	3.07518	0.00210378	0.0249516	12	23	2	0	3	0	up
Ibat.Brg_v3.07DG022090	38.3525	-1.21486	0.412391	-2.94589	0.00322025	0.0346361	35	12	18	42	86	56	down
Ibat.Brg_v3.07DG022800	596.632	1.14826	0.0936716	12.2584	1.51523e-34	5.24934e-32	887	800	614	361	553	348	up
Ibat.Brg_v3.07DG024750	11.3951	-2.98791	0.942285	-3.17091	0.0015196	0.0193825	1	4	2	42	8	12	down
Ibat.Brg_v3.07EG000070	20.3653	-2.49389	0.599602	-4.15924	3.19303e-05	0.00074718	6	6	5	53	33	26	down
Ibat.Brg_v3.07EG000830	27.5141	-1.3639	0.434188	-3.14126	0.00168221	0.021004	15	16	12	35	66	36	down
Ibat.Brg_v3.07EG001640	151.41	-2.41192	0.22103	-10.9122	1.00772e-27	2.42605e-25	34	51	47	224	388	255	down
Ibat.Brg_v3.07EG001840	47.5295	1.98938	0.362164	5.49305	3.95049e-08	1.74915e-06	58	69	80	20	29	16	up
Ibat.Brg_v3.07EG001860	27.6636	1.93611	0.473364	4.09011	4.31161e-05	0.000968508	53	39	31	7	14	17	up
Ibat.Brg_v3.07EG002490	32.9883	-1.48508	0.417382	-3.55807	0.000373588	0.00614029	19	13	16	41	62	58	down
Ibat.Brg_v3.07EG002830	48.0409	1.09241	0.350419	3.11745	0.00182421	0.0223758	48	77	55	33	35	33	up
Ibat.Brg_v3.07EG003600	41.6877	1.02612	0.365167	2.81	0.00495412	0.0478631	62	63	33	34	38	21	up
Ibat.Brg_v3.07EG005570	10.6766	-6.74308	2.3787	-2.83478	0.00458572	0.0451496	0	0	0	56	8	2	down
Ibat.Brg_v3.07EG005680	45.6174	1.66577	0.416149	4.00283	6.25905e-05	0.00133049	48	46	91	21	26	25	up
Ibat.Brg_v3.07EG005730	215.616	1.26966	0.189536	6.69875	2.10203e-11	1.46216e-09	296	329	224	127	138	149	up
Ibat.Brg_v3.07EG005990	66.0458	1.34839	0.439807	3.06588	0.00217033	0.0255659	184	60	33	29	48	47	up
Ibat.Brg_v3.07EG006900	41.4153	1.78407	0.388603	4.59098	4.41163e-06	0.000129095	75	49	55	25	29	10	up
Ibat.Brg_v3.07EG010390	52.0951	-1.03519	0.361995	-2.85967	0.00424082	0.0427089	39	19	36	91	90	53	down
Ibat.Brg_v3.07EG011690	49.1953	1.09213	0.333923	3.2706	0.0010732	0.01472	60	63	61	36	34	33	up
Ibat.Brg_v3.07EG012750	49.1058	1.60076	0.427493	3.74454	0.000180722	0.00333633	30	95	75	20	35	27	up
Ibat.Brg_v3.07EG013400	118.295	1.20647	0.207302	5.81988	5.88902e-09	2.95784e-07	157	167	134	71	96	73	up
Ibat.Brg_v3.07EG014400	36.8756	2.36342	0.461597	5.1201	3.05374e-07	1.14507e-05	64	84	28	7	19	15	up
Ibat.Brg_v3.07EG018360	42.2533	1.91738	0.533761	3.5922	0.000327893	0.00550836	23	90	67	15	11	29	up
Ibat.Brg_v3.07EG018530	197.828	-1.31824	0.239292	-5.50892	3.61036e-08	1.61161e-06	123	131	65	372	276	266	down
Ibat.Brg_v3.07EG020830	209.008	1.53712	0.192973	7.96545	1.64626e-15	1.73211e-13	305	256	298	93	201	82	up
Ibat.Brg_v3.07EG023680	45.315	1.2091	0.392978	3.07676	0.00209264	0.0248576	91	33	53	28	34	29	up
Ibat.Brg_v3.07FG000150	20.1059	1.73406	0.530366	3.26955	0.00107718	0.0147658	44	25	19	9	15	8	up
Ibat.Brg_v3.07FG000410	66.4605	-2.07094	0.302304	-6.85052	7.35839e-12	5.41547e-10	23	26	22	90	174	105	down
Ibat.Brg_v3.07FG001140	203.198	-2.0251	0.181409	-11.1631	6.17706e-29	1.58948e-26	70	92	61	290	477	337	down
Ibat.Brg_v3.07FG001340	60.3538	1.56148	0.300145	5.20242	1.96713e-07	7.66348e-06	87	92	72	37	45	22	up
Ibat.Brg_v3.07FG002140	24.1927	2.25193	0.768415	2.93062	0.00338291	0.0359985	7	11	82	10	11	7	up
Ibat.Brg_v3.07FG003550	11.2473	-2.99058	1.04597	-2.85915	0.00424779	0.0427365	3	2	2	49	14	1	down
Ibat.Brg_v3.07FG004970	37.519	1.56468	0.484941	3.22654	0.00125299	0.016683	65	52	40	38	14	9	up
Ibat.Brg_v3.07FG006000	53.84	2.59863	0.350028	7.42405	1.13592e-13	1.01221e-11	109	83	67	13	19	19	up
Ibat.Brg_v3.07FG006010	13.0361	4.13688	0.890824	4.64388	3.41922e-06	0.000102721	30	17	22	0	4	1	up
Ibat.Brg_v3.07FG007340	10.2685	-2.58354	0.836567	-3.08826	0.0020133	0.0241324	1	3	4	21	32	9	down
Ibat.Brg_v3.07FG007430	106.357	-1.1393	0.227839	-5.00045	5.71976e-07	2.0516e-05	58	59	66	135	229	136	down
Ibat.Brg_v3.07FG007500	14.0763	-6.17461	1.31375	-4.7	2.60167e-06	8.0827e-05	0	1	0	20	60	21	down
Ibat.Brg_v3.07FG007980	100.104	1.28713	0.35312	3.64504	0.000267355	0.00465153	163	117	118	27	154	38	up
Ibat.Brg_v3.07FG009880	22.0326	-1.7425	0.555798	-3.13514	0.00171774	0.0213164	12	14	3	21	59	38	down
Ibat.Brg_v3.07FG009940	10.1098	-2.59987	0.819015	-3.17439	0.00150154	0.0192143	4	2	2	24	19	14	down
Ibat.Brg_v3.07FG012430	15.2333	2.05607	0.635979	3.23293	0.00122528	0.0163848	28	24	17	2	9	9	up
Ibat.Brg_v3.07FG012440	56.3464	1.35389	0.324134	4.17696	2.95428e-05	0.000698446	87	79	60	24	39	42	up
Ibat.Brg_v3.07FG019770	92.1973	1.10887	0.271565	4.08324	4.4412e-05	0.00099218	153	126	77	44	80	72	up
Ibat.Brg_v3.07FG020320	841.542	-2.05167	0.0918435	-22.3387	1.55412e-110	3.80598e-107	305	335	269	1238	2038	1334	down
Ibat.Brg_v3.07FG020590	127.701	-1.05716	0.198711	-5.32012	1.03701e-07	4.2794e-06	80	88	63	167	250	167	down
Ibat.Brg_v3.07FG020750	7.10497	3.38901	1.09882	3.08422	0.00204086	0.0243969	6	16	13	0	1	3	up
Ibat.Brg_v3.07FG021370	40.7114	-1.16791	0.386315	-3.02321	0.00250108	0.028562	22	27	21	51	114	37	down
Ibat.Brg_v3.07FG021380	401.751	-1.11907	0.125513	-8.91592	4.83795e-19	6.63303e-17	289	215	204	546	891	460	down
Ibat.Brg_v3.07FG022400	17.5991	2.17391	0.598738	3.63082	0.000282517	0.0048582	26	34	21	3	15	5	up
Ibat.Brg_v3.07FG022840	12.0578	3.3382	0.942491	3.54189	0.000397277	0.00645791	29	32	3	5	1	1	up
Ibat.Brg_v3.07FG022930	27.7981	-1.43915	0.496532	-2.8984	0.0037507	0.0389039	8	18	15	57	58	23	down
Ibat.Brg_v3.07FG024590	105.487	-1.03582	0.256984	-4.03068	5.56164e-05	0.00120167	83	58	52	171	149	142	down
Ibat.Brg_v3.07FG024920	105.182	1.11977	0.229139	4.88687	1.02451e-06	3.47972e-05	155	151	98	76	85	61	up
Ibat.Brg_v3.07FG025200	48.4155	1.29829	0.371561	3.49416	0.000475548	0.0075169	57	61	70	42	33	18	up
Ibat.Brg_v3.07FG025290	29.0488	-1.45486	0.471073	-3.08841	0.00201233	0.0241315	8	16	18	52	47	40	down
Ibat.Brg_v3.07FG025340	39.8326	-1.41846	0.395997	-3.58199	0.000340987	0.00569407	31	16	14	67	64	59	down
Ibat.Brg_v3.07FG025520	59.8207	1.5324	0.370914	4.13141	3.6055e-05	0.000829757	110	102	42	45	41	18	up
Ibat.Brg_v3.07FG025850	12.941	-2.74697	0.815866	-3.36694	0.00076007	0.0111162	3	0	6	34	28	13	down
Ibat.Brg_v3.08AG000900	30.1727	-1.51144	0.451368	-3.34858	0.000812278	0.0117443	9	20	14	53	52	42	down
Ibat.Brg_v3.08AG001240	165.271	-1.03479	0.191108	-5.41466	6.14044e-08	2.6398e-06	94	123	84	248	289	205	down
Ibat.Brg_v3.08AG001550	22.8927	-2.32124	0.638444	-3.63578	0.00027714	0.00478775	4	11	6	70	25	25	down
Ibat.Brg_v3.08AG002710	83.8249	-1.11275	0.303607	-3.66512	0.000247226	0.00435681	63	52	34	165	128	85	down
Ibat.Brg_v3.08AG006090	20.1509	-1.79133	0.5383	-3.32775	0.000875516	0.0125059	8	10	7	29	35	38	down
Ibat.Brg_v3.08AG007010	10.5411	-4.82901	1.27855	-3.77693	0.00015877	0.00298962	0	2	0	40	18	8	down
Ibat.Brg_v3.08AG007360	61.1465	-1.20163	0.304813	-3.94218	8.07458e-05	0.00166509	45	24	34	83	128	79	down
Ibat.Brg_v3.08AG008790	39.6898	-1.25072	0.376842	-3.31895	0.000903572	0.0128266	21	30	15	53	97	45	down
Ibat.Brg_v3.08AG009170	51.3428	-1.07222	0.329225	-3.25681	0.00112672	0.0153411	32	26	33	61	93	78	down
Ibat.Brg_v3.08AG010910	50.1153	1.15818	0.31904	3.6302	0.000283198	0.00486755	60	76	56	30	45	30	up
Ibat.Brg_v3.08AG013040	47.7667	-1.3142	0.462787	-2.83974	0.00451501	0.0447032	23	38	16	113	94	25	down
Ibat.Brg_v3.08AG013880	20.773	2.57313	0.58903	4.36842	1.25147e-05	0.000325327	44	18	36	4	8	8	up
Ibat.Brg_v3.08AG015460	121.366	-2.58916	0.260639	-9.93391	2.96385e-23	5.6584e-21	48	22	27	170	343	205	down
Ibat.Brg_v3.08AG015490	14.8888	-2.64332	0.869669	-3.03946	0.00237006	0.0273739	3	2	6	5	20	54	down
Ibat.Brg_v3.08AG016120	15.7066	-2.44426	0.757134	-3.22831	0.00124524	0.0166017	3	2	8	49	25	12	down
Ibat.Brg_v3.08AG016260	58.8056	-1.77252	0.342659	-5.17282	2.30583e-07	8.83755e-06	17	37	20	100	144	69	down
Ibat.Brg_v3.08AG016450	23.8721	1.69126	0.542324	3.11854	0.00181749	0.0223203	40	24	37	4	27	10	up
Ibat.Brg_v3.08AG016910	53.1562	1.61263	0.365503	4.4121	1.02374e-05	0.000273024	58	77	84	29	49	14	up
Ibat.Brg_v3.08AG017140	48.0255	1.53674	0.404492	3.79918	0.000145176	0.00276419	41	90	65	32	40	13	up
Ibat.Brg_v3.08AG017240	18.1299	2.06301	0.559505	3.68721	0.000226724	0.00405386	27	28	26	9	11	4	up
Ibat.Brg_v3.08AG017280	34.5861	1.59737	0.419173	3.81076	0.00013854	0.00265134	48	37	57	12	29	18	up
Ibat.Brg_v3.08AG018890	31.269	2.17469	0.439188	4.95163	7.35958e-07	2.58368e-05	52	55	37	8	23	9	up
Ibat.Brg_v3.08AG019120	31.4612	1.46401	0.441065	3.31926	0.000902565	0.0128149	39	41	47	19	32	8	up
Ibat.Brg_v3.08BG000550	16.8979	-3.40749	0.713111	-4.77834	1.76746e-06	5.68837e-05	1	4	3	36	40	27	down
Ibat.Brg_v3.08BG000740	8.47174	-3.40672	1.01332	-3.36192	0.000774025	0.0112897	2	0	2	16	16	18	down
Ibat.Brg_v3.08BG001170	137.513	-1.45308	0.273735	-5.30833	1.10636e-07	4.53698e-06	48	85	69	275	275	130	down
Ibat.Brg_v3.08BG001770	79.0833	-1.12902	0.402665	-2.80387	0.00504936	0.0485324	48	50	40	193	133	38	down
Ibat.Brg_v3.08BG003260	118.579	1.04225	0.205268	5.07751	3.82406e-07	1.41083e-05	158	151	134	69	112	81	up
Ibat.Brg_v3.08BG003800	70.1442	-1.03713	0.305725	-3.39235	0.000692953	0.0102893	46	33	47	89	107	112	down
Ibat.Brg_v3.08BG005300	21.543	2.82924	0.798718	3.54222	0.00039677	0.00645262	47	3	52	7	11	1	up
Ibat.Brg_v3.08BG006200	13.0353	3.13737	1.05821	2.96479	0.00302891	0.0330536	4	5	49	5	0	3	up
Ibat.Brg_v3.08BG007750	12.0775	-3.14869	0.884974	-3.55795	0.000373767	0.00614181	5	1	1	7	43	27	down
Ibat.Brg_v3.08BG010510	87.4859	1.27183	0.289099	4.39927	1.08614e-05	0.000287505	158	76	110	46	67	58	up
Ibat.Brg_v3.08BG010980	504.851	1.03355	0.100383	10.2961	7.3374e-25	1.51483e-22	663	690	535	322	476	323	up
Ibat.Brg_v3.08BG018050	768.547	1.6073	0.109855	14.631	1.78086e-48	1.13943e-45	1022	1209	972	339	525	412	up
Ibat.Brg_v3.08BG018400	36.7126	-1.18508	0.377876	-3.13617	0.00171172	0.0212677	26	21	16	55	82	39	down
Ibat.Brg_v3.08BG019970	45.0272	1.82254	0.555648	3.28002	0.00103798	0.0143391	149	18	37	12	35	22	up
Ibat.Brg_v3.08CG001040	53.1326	-1.46513	0.336562	-4.35322	1.3415e-05	0.000346573	38	17	24	76	121	70	down
Ibat.Brg_v3.08CG001130	41.247	-1.02726	0.358002	-2.86943	0.00411207	0.0417079	22	29	24	47	81	59	down
Ibat.Brg_v3.08CG001600	13.8651	-2.20997	0.695214	-3.17883	0.00147869	0.0189835	5	8	1	29	28	19	down
Ibat.Brg_v3.08CG001610	54.5766	-1.28065	0.318072	-4.02629	5.66626e-05	0.00122204	32	28	28	72	97	87	down
Ibat.Brg_v3.08CG001650	337.22	-1.05867	0.135612	-7.8066	5.87501e-15	5.88495e-13	253	172	184	469	638	429	down
Ibat.Brg_v3.08CG002020	103.446	-3.13197	0.813276	-3.85106	0.00011761	0.00229784	20	16	22	218	58	276	down
Ibat.Brg_v3.08CG002760	34.0476	-5.95269	0.998573	-5.9612	2.50393e-09	1.32412e-07	2	0	1	48	31	122	down
Ibat.Brg_v3.08CG004580	20.1794	-2.69356	0.667876	-4.03303	5.50627e-05	0.00119188	1	10	4	38	71	17	down
Ibat.Brg_v3.08CG005190	37.6477	-1.44877	0.422596	-3.42826	0.000607463	0.00921641	10	22	23	56	96	40	down
Ibat.Brg_v3.08CG005690	6.21524	-4.05683	1.3304	-3.04934	0.00229348	0.0266759	2	0	0	12	12	14	down
Ibat.Brg_v3.08CG006750	18.8356	-1.75184	0.578681	-3.0273	0.00246751	0.0282604	6	12	6	41	39	18	down
Ibat.Brg_v3.08CG006900	7.36027	-4.30402	1.3319	-3.2315	0.00123142	0.0164545	0	2	0	20	26	4	down
Ibat.Brg_v3.08CG007920	24.1985	-1.8395	0.647799	-2.83962	0.00451679	0.0447101	11	8	10	19	20	75	down
Ibat.Brg_v3.08CG008560	90.0098	-1.15701	0.313545	-3.6901	0.000224166	0.0040152	68	49	40	154	224	61	down
Ibat.Brg_v3.08CG009450	8.39764	-6.38366	1.45568	-4.38535	1.15799e-05	0.000303807	0	0	0	9	10	32	down
Ibat.Brg_v3.08CG009710	32.0255	-1.49769	0.458985	-3.26304	0.00110223	0.0150568	26	7	14	56	69	36	down
Ibat.Brg_v3.08CG011470	21.4263	1.53139	0.518641	2.9527	0.00315007	0.034067	19	38	30	12	15	10	up
Ibat.Brg_v3.08CG011760	7.27249	-5.21777	1.67051	-3.12345	0.00178744	0.0220274	1	0	0	1	60	1	down
Ibat.Brg_v3.08CG013290	48.0975	1.90288	0.536876	3.54435	0.00039358	0.00641077	35	29	132	15	38	18	up
Ibat.Brg_v3.08CG017250	5.46899	-5.80043	1.61837	-3.58413	0.000338207	0.00565164	0	0	0	8	35	1	down
Ibat.Brg_v3.08CG018370	18.3071	1.72454	0.547223	3.15143	0.00162471	0.0204369	24	29	25	7	17	6	up
Ibat.Brg_v3.08DG000440	37.7115	-1.3204	0.397056	-3.32547	0.000882699	0.0125933	30	16	15	51	99	40	down
Ibat.Brg_v3.08DG000550	30.3375	-1.58389	0.508487	-3.11491	0.00184003	0.0225425	13	16	13	77	55	20	down
Ibat.Brg_v3.08DG001440	34.8968	-1.45147	0.416897	-3.4816	0.000498428	0.0078142	19	18	15	33	77	63	down
Ibat.Brg_v3.08DG001600	38.2233	-6.70427	1.29001	-5.19706	2.02467e-07	7.8618e-06	0	1	1	85	209	0	down
Ibat.Brg_v3.08DG001710	10.7389	-2.76354	0.901816	-3.06442	0.00218096	0.0256436	6	2	0	32	23	8	down
Ibat.Brg_v3.08DG001780	14.8573	-2.45769	0.713448	-3.44481	0.00057147	0.0087526	9	2	2	34	23	24	down
Ibat.Brg_v3.08DG002260	39.6739	-1.18605	0.396137	-2.99405	0.00275305	0.0307327	23	30	15	74	77	36	down
Ibat.Brg_v3.08DG002280	46.0423	-1.53504	0.485707	-3.16042	0.00157543	0.0199336	22	33	12	89	139	20	down
Ibat.Brg_v3.08DG002310	17.6679	2.31444	0.713125	3.24549	0.00117248	0.0158549	14	13	49	8	5	6	up
Ibat.Brg_v3.08DG002620	213.714	1.27469	0.159863	7.97362	1.54092e-15	1.62368e-13	289	322	233	127	199	103	up
Ibat.Brg_v3.08DG003130	10.0557	-3.07529	0.980977	-3.13493	0.00171896	0.0213241	0	5	1	12	49	8	down
Ibat.Brg_v3.08DG003690	14.063	3.08854	0.757335	4.07817	4.53923e-05	0.00100963	36	10	24	4	4	2	up
Ibat.Brg_v3.08DG003920	160.573	1.05809	0.235013	4.50227	6.72318e-06	0.000187483	168	250	180	108	106	124	up
Ibat.Brg_v3.08DG005560	57.1961	-1.22681	0.316795	-3.87257	0.000107694	0.00213584	29	39	27	66	112	91	down
Ibat.Brg_v3.08DG005630	12.0317	2.37073	0.810557	2.92481	0.00344661	0.0365559	18	18	20	0	13	2	up
Ibat.Brg_v3.08DG005880	17.4221	-2.13118	0.693237	-3.07424	0.00211037	0.0250215	1	4	12	35	44	18	down
Ibat.Brg_v3.08DG006380	44.6961	-1.76138	0.54518	-3.23082	0.00123436	0.0164814	24	22	12	30	218	27	down
Ibat.Brg_v3.08DG008830	33.8002	-1.28177	0.399529	-3.20821	0.00133566	0.0175567	23	18	14	49	57	52	down
Ibat.Brg_v3.08DG008910	28.8492	-1.84263	0.478164	-3.85355	0.000116417	0.00227949	6	12	16	39	63	49	down
Ibat.Brg_v3.08DG009180	9.24707	-2.40566	0.825764	-2.91325	0.00357683	0.0375243	2	2	4	15	24	14	down
Ibat.Brg_v3.08DG009700	28.6741	-1.69798	0.568561	-2.98645	0.00282237	0.0313489	6	19	12	79	43	21	down
Ibat.Brg_v3.08DG010490	17.5324	-4.57912	0.894608	-5.11858	3.07851e-07	1.15193e-05	4	0	0	40	47	27	down
Ibat.Brg_v3.08DG011910	21.9866	-2.26954	0.529219	-4.28848	1.79903e-05	0.000451792	7	7	7	37	63	27	down
Ibat.Brg_v3.08DG013560	8.04571	-5.35879	1.5367	-3.48721	0.000488094	0.00768272	0	0	1	2	57	6	down
Ibat.Brg_v3.08DG016180	88.3905	1.07099	0.332664	3.21942	0.00128449	0.0170099	97	70	154	69	64	54	up
Ibat.Brg_v3.08DG016600	116.129	-1.11281	0.228968	-4.8601	1.17324e-06	3.92481e-05	68	58	76	136	251	156	down
Ibat.Brg_v3.08DG017280	16.5754	-2.21568	0.683261	-3.2428	0.00118361	0.0159718	13	2	2	30	48	18	down
Ibat.Brg_v3.08DG017740	80.9144	-1.28342	0.26676	-4.81114	1.5007e-06	4.88897e-05	36	53	41	115	152	116	down
Ibat.Brg_v3.08EG000800	39.214	-1.52816	0.489042	-3.1248	0.00177928	0.0219382	4	24	26	48	90	60	down
Ibat.Brg_v3.08EG001240	5.23536	-5.7391	1.58941	-3.61084	0.000305207	0.00517446	0	0	0	3	34	5	down
Ibat.Brg_v3.08EG001870	46.2714	-1.46598	0.492143	-2.97877	0.0028941	0.0319656	25	25	19	78	159	16	down
Ibat.Brg_v3.08EG002060	83.7339	1.40688	0.261821	5.37344	7.72497e-08	3.26564e-06	101	114	119	46	73	38	up
Ibat.Brg_v3.08EG002320	80.3892	-1.49237	0.267446	-5.58008	2.40405e-08	1.10294e-06	42	45	31	97	201	113	down
Ibat.Brg_v3.08EG003220	90.4229	1.05094	0.234781	4.47627	7.59583e-06	0.000208848	130	108	101	56	81	61	up
Ibat.Brg_v3.08EG003570	83.4145	-1.20809	0.283865	-4.25586	2.0825e-05	0.000514074	65	29	46	118	154	117	down
Ibat.Brg_v3.08EG003790	54.5823	-1.37819	0.330532	-4.16961	3.05118e-05	0.000718962	22	35	27	75	138	62	down
Ibat.Brg_v3.08EG005380	21.5252	-2.35962	0.697497	-3.38299	0.000717016	0.0105862	7	2	10	66	45	10	down
Ibat.Brg_v3.08EG006000	47.5759	-1.04224	0.349871	-2.97892	0.00289266	0.0319646	37	19	30	59	86	69	down
Ibat.Brg_v3.08EG006160	21.6805	1.83137	0.64566	2.83643	0.00456215	0.0450193	68	14	16	6	10	15	up
Ibat.Brg_v3.08EG006480	57.9358	-1.42872	0.350421	-4.07715	4.55917e-05	0.00101375	41	14	32	83	134	73	down
Ibat.Brg_v3.08EG006530	7.8099	-3.00297	0.989009	-3.03634	0.00239471	0.0276137	3	2	0	12	28	10	down
Ibat.Brg_v3.08EG006770	15.2654	-2.86444	0.866654	-3.30517	0.000949188	0.0133435	2	4	4	7	16	58	down
Ibat.Brg_v3.08EG007070	12.4861	-2.84166	1.00043	-2.84044	0.00450516	0.0446306	2	0	6	43	4	18	down
Ibat.Brg_v3.08EG007100	13.2193	-2.54438	0.743517	-3.42208	0.000621434	0.00939026	4	6	1	31	35	12	down
Ibat.Brg_v3.08EG007230	48.9663	-1.21733	0.346978	-3.50838	0.000450843	0.00718073	38	18	26	61	98	72	down
Ibat.Brg_v3.08EG008680	9.40239	-3.54335	1.09841	-3.22589	0.0012558	0.0167048	0	2	2	36	7	10	down
Ibat.Brg_v3.08EG009120	68.8926	-1.17217	0.281228	-4.16805	3.07219e-05	0.000723185	46	43	30	84	167	82	down
Ibat.Brg_v3.08EG009200	50.4675	-1.75345	0.403302	-4.34773	1.37551e-05	0.000354329	12	33	19	57	159	63	down
Ibat.Brg_v3.08EG009370	67.9047	1.1612	0.401005	2.89573	0.00378281	0.0391683	75	44	131	28	64	50	up
Ibat.Brg_v3.08EG009880	17.7868	-2.47974	0.630381	-3.93371	8.36435e-05	0.00171687	5	4	6	29	63	17	down
Ibat.Brg_v3.08EG011830	15.1272	-2.78252	0.973109	-2.85942	0.00424422	0.0427189	7	3	1	7	5	64	down
Ibat.Brg_v3.08EG014020	23.7096	2.44769	0.594809	4.1151	3.87019e-05	0.000881248	58	40	18	2	19	6	up
Ibat.Brg_v3.08EG014400	14.0108	-2.39974	0.834897	-2.8743	0.00404928	0.0412461	4	2	6	13	10	47	down
Ibat.Brg_v3.08EG016260	25.9452	-3.19822	0.564379	-5.6668	1.4549e-08	6.93004e-07	5	2	7	52	72	36	down
Ibat.Brg_v3.08EG016270	167.172	-2.08851	0.22731	-9.18793	4.00472e-20	6.01301e-18	87	38	53	231	413	278	down
Ibat.Brg_v3.08EG016330	30.7177	-1.32669	0.440588	-3.01119	0.00260227	0.0294383	10	22	16	49	53	43	down
Ibat.Brg_v3.08EG019260	10.9723	3.58991	0.883503	4.06327	4.8391e-05	0.00106544	28	18	12	2	4	0	up
Ibat.Brg_v3.08FG000660	11.2431	-2.40464	0.768329	-3.1297	0.00174984	0.0216467	4	4	2	28	20	14	down
Ibat.Brg_v3.08FG001140	15.2001	-4.34981	0.90778	-4.7917	1.6537e-06	5.34909e-05	2	2	0	22	37	37	down
Ibat.Brg_v3.08FG001240	31.6023	-1.5536	0.512749	-3.02995	0.00244598	0.0280636	20	4	20	30	84	50	down
Ibat.Brg_v3.08FG001250	67.3257	-1.02204	0.316067	-3.23363	0.00122227	0.0163599	56	25	42	91	110	97	down
Ibat.Brg_v3.08FG004710	43.3797	-1.10776	0.37563	-2.94906	0.0031874	0.0343751	22	22	31	44	88	68	down
Ibat.Brg_v3.08FG004880	16.9024	-2.7074	0.880182	-3.07596	0.00209826	0.024907	4	1	7	70	11	9	down
Ibat.Brg_v3.08FG005400	28.2665	-2.17551	0.663109	-3.28077	0.00103523	0.0143057	6	18	5	37	134	10	down
Ibat.Brg_v3.08FG005430	160.397	-2.18846	0.77291	-2.83146	0.00463364	0.0455035	59	44	56	58	434	405	down
Ibat.Brg_v3.08FG005450	191.694	1.39427	0.495221	2.81545	0.00487097	0.0472333	298	247	228	182	91	67	up
Ibat.Brg_v3.08FG006060	100.572	-1.21038	0.237486	-5.09663	3.45748e-07	1.28291e-05	58	47	62	147	200	127	down
Ibat.Brg_v3.08FG006900	5.64533	-3.90669	1.36617	-2.85958	0.00424196	0.0427143	0	2	0	9	24	6	down
Ibat.Brg_v3.08FG007430	56.9689	1.22916	0.31702	3.87725	0.000105644	0.00210222	75	96	53	27	52	37	up
Ibat.Brg_v3.08FG008370	116.758	-1.58071	0.245151	-6.44791	1.13405e-10	7.15854e-09	62	40	59	177	212	188	down
Ibat.Brg_v3.08FG009310	59.4977	-1.02535	0.336772	-3.04464	0.00232958	0.0270206	42	38	29	78	76	102	down
Ibat.Brg_v3.08FG010810	10.4238	-2.92532	0.893406	-3.27435	0.00105906	0.0145567	6	1	0	21	19	20	down
Ibat.Brg_v3.08FG015020	30.4654	1.20224	0.42568	2.82427	0.00473888	0.0463064	38	44	36	23	31	10	up
Ibat.Brg_v3.08FG015790	24.8361	2.02566	0.503396	4.024	5.72191e-05	0.00123142	27	48	35	6	18	10	up
Ibat.Brg_v3.08FG015820	69.9626	1.05216	0.310275	3.39106	0.000696233	0.0103307	68	91	99	46	82	31	up
Ibat.Brg_v3.08FG020450	117.671	-1.24788	0.22397	-5.57164	2.52354e-08	1.15478e-06	57	73	63	171	269	131	down
Ibat.Brg_v3.08FG020760	14.7531	2.18439	0.643765	3.39314	0.000690952	0.0102681	25	18	24	3	12	4	up
Ibat.Brg_v3.08FG021360	58.1065	-2.95222	0.377025	-7.83029	4.86738e-15	4.93126e-13	13	11	13	100	195	70	down
Ibat.Brg_v3.08FG021870	64.28	1.07223	0.316975	3.38269	0.000717786	0.0105916	102	87	56	57	43	36	up
Ibat.Brg_v3.08FG022040	25.0073	1.41494	0.472477	2.99474	0.00274682	0.030697	49	28	26	11	26	11	up
Ibat.Brg_v3.08FG022560	441.718	-1.20794	0.129853	-9.30236	1.3736e-20	2.16303e-18	287	280	181	703	822	544	down
Ibat.Brg_v3.08FG022790	16.6231	1.72446	0.603064	2.8595	0.00424312	0.0427147	36	18	18	4	11	11	up
Ibat.Brg_v3.08FG022820	194.669	1.09756	0.161597	6.79196	1.10623e-11	7.97612e-10	296	241	205	131	184	107	up
Ibat.Brg_v3.08FG023180	10.8311	3.10435	1.10357	2.81301	0.00490806	0.0475215	2	3	43	1	5	2	up
Ibat.Brg_v3.08FG023200	11.7226	-3.06554	0.959064	-3.19638	0.00139162	0.0181245	4	1	2	46	18	4	down
Ibat.Brg_v3.09AG000240	13.0427	1.98426	0.650651	3.04965	0.00229108	0.0266611	21	20	17	7	8	3	up
Ibat.Brg_v3.09AG000540	11.613	2.18666	0.760634	2.87479	0.00404294	0.0412069	35	11	9	5	5	4	up
Ibat.Brg_v3.09AG000620	5.92327	-5.91612	1.5865	-3.72905	0.000192206	0.00351815	0	0	0	2	40	6	down
Ibat.Brg_v3.09AG000860	40.0672	1.95677	0.542043	3.60999	0.000306208	0.00518647	38	22	106	16	29	12	up
Ibat.Brg_v3.09AG001010	52.6263	1.2042	0.332637	3.62016	0.000294419	0.00502032	96	66	46	25	50	34	up
Ibat.Brg_v3.09AG001500	13.3077	2.73502	0.713261	3.83453	0.000125806	0.00243453	15	30	19	4	6	2	up
Ibat.Brg_v3.09AG001570	52.0268	1.13947	0.358707	3.1766	0.00149012	0.0190922	53	66	76	20	53	38	up
Ibat.Brg_v3.09AG002450	44.4732	-1.24633	0.340933	-3.65566	0.000256519	0.00449826	23	26	24	58	98	58	down
Ibat.Brg_v3.09AG003560	79.9349	-1.94505	0.279004	-6.97142	3.13767e-12	2.43007e-10	30	30	31	108	178	140	down
Ibat.Brg_v3.09AG003640	192.738	-1.07288	0.180759	-5.93545	2.93042e-09	1.53367e-07	117	143	87	227	381	276	down
Ibat.Brg_v3.09AG003770	7.47256	3.49645	1.11103	3.14704	0.00164933	0.020677	6	10	20	3	1	0	up
Ibat.Brg_v3.09AG005050	7.2373	-2.87687	1.02419	-2.80891	0.00497088	0.0479793	2	3	0	10	29	8	down
Ibat.Brg_v3.09AG005410	120.976	1.19931	0.215748	5.55884	2.71577e-08	1.23558e-06	183	170	119	65	98	83	up
Ibat.Brg_v3.09AG006480	137.391	1.82236	0.254311	7.16588	7.72905e-13	6.35321e-11	275	211	123	80	86	40	up
Ibat.Brg_v3.09AG006700	62.2051	1.98293	0.329395	6.0199	1.74525e-09	9.43286e-08	85	85	101	34	28	21	up
Ibat.Brg_v3.09AG006710	58.3775	1.38159	0.345538	3.99837	6.37814e-05	0.00135445	83	66	82	32	29	43	up
Ibat.Brg_v3.09AG007630	35.3861	1.09714	0.390724	2.80795	0.00498574	0.0480901	55	40	40	24	41	14	up
Ibat.Brg_v3.09AG008440	17.2945	2.15782	0.626326	3.4452	0.000570637	0.00874173	33	38	10	7	7	7	up
Ibat.Brg_v3.09AG009620	10.3175	3.71635	1.18729	3.13011	0.00174739	0.0216228	53	3	2	3	2	0	up
Ibat.Brg_v3.09AG010470	64.9776	1.17607	0.329729	3.56677	0.000361403	0.00597208	130	62	63	29	65	43	up
Ibat.Brg_v3.09AG010910	157.363	1.11906	0.186599	5.99715	2.0081e-09	1.07634e-07	248	206	152	87	157	96	up
Ibat.Brg_v3.09AG012090	27.3784	1.5844	0.445222	3.55869	0.000372714	0.00612876	42	34	38	12	26	10	up
Ibat.Brg_v3.09AG013150	44.9971	-1.66968	0.35254	-4.73615	2.17817e-06	6.90288e-05	25	17	18	76	101	56	down
Ibat.Brg_v3.09AG014010	1357.47	1.0417	0.0703136	14.8151	1.17006e-49	7.69426e-47	1984	1698	1419	935	1235	824	up
Ibat.Brg_v3.09AG015930	64.6154	-1.30297	0.444452	-2.93164	0.00337179	0.0359179	77	13	18	91	166	67	down
Ibat.Brg_v3.09AG017080	10.0012	-2.83486	0.954598	-2.96969	0.00298098	0.0326762	5	0	2	18	43	5	down
Ibat.Brg_v3.09AG017260	11.4357	-3.33149	0.913782	-3.64582	0.000266535	0.00463841	6	0	0	18	34	20	down
Ibat.Brg_v3.09AG018000	88.4981	1.30457	0.250832	5.20097	1.98249e-07	7.71488e-06	138	137	80	54	73	46	up
Ibat.Brg_v3.09AG018630	14.5732	-2.05023	0.639774	-3.20462	0.00135243	0.0177377	7	6	3	29	34	17	down
Ibat.Brg_v3.09AG019970	14.7841	1.84166	0.656642	2.80466	0.00503698	0.0484906	14	21	27	4	7	10	up
Ibat.Brg_v3.09AG024360	31.898	-2.67104	0.712	-3.75146	0.000175809	0.00325663	8	7	9	9	194	23	down
Ibat.Brg_v3.09AG027400	12.7125	-2.70799	0.771135	-3.5117	0.000445251	0.007106	1	2	6	19	29	25	down
Ibat.Brg_v3.09AG028020	20.1322	2.64661	0.656185	4.03333	5.49915e-05	0.0011907	20	19	52	8	5	5	up
Ibat.Brg_v3.09AG028090	15.3759	2.7596	0.838413	3.29145	0.000996707	0.0138833	64	6	9	4	4	5	up
Ibat.Brg_v3.09AG028320	42.4002	-2.60534	0.417705	-6.23727	4.45276e-10	2.58776e-08	8	14	11	56	102	86	down
Ibat.Brg_v3.09AG029330	397.095	-1.50587	0.119989	-12.55	3.97479e-36	1.47026e-33	199	226	152	585	855	551	down
Ibat.Brg_v3.09AG029780	17.5633	1.58239	0.546161	2.89729	0.00376402	0.0390192	26	24	23	6	14	10	up
Ibat.Brg_v3.09AG030350	24.6971	1.49931	0.508731	2.94715	0.00320718	0.0345426	28	28	43	16	23	6	up
Ibat.Brg_v3.09BG000640	34.111	1.31717	0.410889	3.20565	0.00134756	0.0176983	50	44	42	14	42	14	up
Ibat.Brg_v3.09BG000890	12.1298	3.14318	0.817765	3.84362	0.000121231	0.00236079	10	28	21	2	2	4	up
Ibat.Brg_v3.09BG001690	10.5962	-2.90503	0.820224	-3.54175	0.000397481	0.00645827	3	2	2	15	35	16	down
Ibat.Brg_v3.09BG003000	121.37	-2.26942	0.251639	-9.01856	1.90579e-19	2.71786e-17	25	52	38	204	307	175	down
Ibat.Brg_v3.09BG004940	300.156	1.32031	0.139968	9.43299	3.98577e-21	6.43339e-19	428	385	373	164	226	184	up
Ibat.Brg_v3.09BG005980	33.4529	1.76486	0.428322	4.1204	3.78214e-05	0.000864247	56	65	26	16	23	13	up
Ibat.Brg_v3.09BG006060	34.1942	-1.63198	0.440696	-3.70318	0.00021291	0.00384462	13	16	17	63	90	28	down
Ibat.Brg_v3.09BG006170	320.001	1.51398	0.131054	11.5523	7.18397e-31	2.04082e-28	474	482	368	154	272	145	up
Ibat.Brg_v3.09BG006200	26.4122	2.85345	0.526897	5.41559	6.10885e-08	2.6278e-06	52	52	28	4	15	4	up
Ibat.Brg_v3.09BG006220	70.1323	1.31814	0.288612	4.56718	4.94326e-06	0.000142596	92	82	100	40	49	44	up
Ibat.Brg_v3.09BG007640	186.471	1.63044	0.174677	9.33406	1.01892e-20	1.61526e-18	308	272	208	88	119	98	up
Ibat.Brg_v3.09BG009320	482.995	-1.16688	0.103721	-11.2501	2.31265e-29	6.08312e-27	311	285	233	672	929	649	down
Ibat.Brg_v3.09BG010870	15.0845	2.35775	0.758004	3.11047	0.00186789	0.0228287	41	6	24	4	12	2	up
Ibat.Brg_v3.09BG011460	97.6846	1.06216	0.225021	4.72028	2.3552e-06	7.40117e-05	133	119	114	61	88	64	up
Ibat.Brg_v3.09BG012510	24.4241	-1.88495	0.567352	-3.32237	0.000892562	0.0127059	22	4	4	40	51	38	down
Ibat.Brg_v3.09BG013440	123.759	-1.70224	0.215986	-7.88126	3.24104e-15	3.32628e-13	61	46	54	193	258	184	down
Ibat.Brg_v3.09BG015930	8.87552	2.61071	0.865967	3.01479	0.00257154	0.0291807	20	17	7	1	6	2	up
Ibat.Brg_v3.09BG022930	21.6562	2.24098	0.597337	3.75162	0.000175696	0.00325539	19	51	28	8	5	11	up
Ibat.Brg_v3.09BG022980	39.0032	1.00142	0.355242	2.819	0.00481741	0.0468161	59	49	38	23	41	25	up
Ibat.Brg_v3.09BG028270	19.6308	-1.78596	0.551697	-3.23721	0.00120705	0.0162032	14	6	5	26	44	33	down
Ibat.Brg_v3.09BG029130	19.8047	-2.86202	0.838685	-3.41251	0.000643673	0.00968715	4	3	6	84	21	5	down
Ibat.Brg_v3.09BG029190	24.6093	1.53873	0.464207	3.31475	0.000917254	0.0129819	30	40	31	12	16	14	up
Ibat.Brg_v3.09BG029300	77.8678	1.17698	0.255422	4.60799	4.06578e-06	0.000120032	118	104	80	54	65	42	up
Ibat.Brg_v3.09BG029440	42.2194	1.12884	0.383948	2.94008	0.00328131	0.0351597	39	79	43	23	43	25	up
Ibat.Brg_v3.09CG000170	36.8551	1.7975	0.387204	4.64226	3.44622e-06	0.000103416	55	61	44	18	28	11	up
Ibat.Brg_v3.09CG001390	471.147	1.04672	0.111236	9.4099	4.96587e-21	7.97909e-19	707	555	511	319	474	258	up
Ibat.Brg_v3.09CG001590	158.472	1.05885	0.198449	5.33561	9.52219e-08	3.95477e-06	232	193	173	74	175	106	up
Ibat.Brg_v3.09CG001760	22.8257	2.09686	0.509123	4.11858	3.8122e-05	0.000869995	40	44	21	8	15	7	up
Ibat.Brg_v3.09CG001950	35.0653	1.24812	0.42835	2.91379	0.00357067	0.037491	28	48	57	19	30	21	up
Ibat.Brg_v3.09CG003500	41.4708	1.07724	0.355383	3.03122	0.00243566	0.0279723	68	51	39	31	33	25	up
Ibat.Brg_v3.09CG003830	95.0068	1.17722	0.256687	4.58619	4.51414e-06	0.000131877	135	156	80	52	80	64	up
Ibat.Brg_v3.09CG004220	47.0491	-1.23824	0.345789	-3.58091	0.000342395	0.00571222	32	30	17	76	102	49	down
Ibat.Brg_v3.09CG006920	10.5019	-3.10822	0.910642	-3.41322	0.000642013	0.0096672	3	0	3	9	30	25	down
Ibat.Brg_v3.09CG007030	14.7498	-3.09891	0.978957	-3.16552	0.00154805	0.0196606	8	1	0	42	4	32	down
Ibat.Brg_v3.09CG007880	100.304	-1.15588	0.27188	-4.25144	2.12403e-05	0.000522691	54	51	66	119	270	103	down
Ibat.Brg_v3.09CG008620	45.2958	1.30404	0.365978	3.56316	0.000366413	0.00604053	88	62	34	24	39	26	up
Ibat.Brg_v3.09CG008940	103.163	1.41943	0.225789	6.28653	3.24646e-10	1.92779e-08	148	134	133	57	74	57	up
Ibat.Brg_v3.09CG010510	79.6138	-1.32676	0.27466	-4.83054	1.36163e-06	4.48291e-05	56	35	36	132	171	86	down
Ibat.Brg_v3.09CG013310	235.991	-1.4434	0.187301	-7.70633	1.29485e-14	1.25458e-12	123	143	88	341	399	392	down
Ibat.Brg_v3.09CG014080	240.627	-1.32576	0.170389	-7.78079	7.20711e-15	7.18889e-13	139	160	87	307	571	312	down
Ibat.Brg_v3.09CG014220	17.364	-6.46989	1.91454	-3.37934	0.000726601	0.0107061	1	0	0	81	27	3	down
Ibat.Brg_v3.09CG015390	46.5401	1.03064	0.336782	3.06026	0.00221148	0.0259302	63	72	41	28	52	26	up
Ibat.Brg_v3.09CG015770	11.3862	2.1233	0.735672	2.88621	0.00389912	0.0400978	17	11	22	3	5	6	up
Ibat.Brg_v3.09CG015840	110.998	-1.16443	0.227152	-5.12623	2.95599e-07	1.11135e-05	76	51	63	167	227	128	down
Ibat.Brg_v3.09CG016420	49.9296	-1.93628	0.427702	-4.52717	5.97777e-06	0.000169005	14	18	24	109	59	81	down
Ibat.Brg_v3.09CG018770	16.4893	2.14833	0.759469	2.82872	0.00467344	0.0457993	30	11	32	0	8	12	up
Ibat.Brg_v3.09CG027000	27.9971	-1.48012	0.494514	-2.99308	0.00276176	0.0308203	13	14	14	20	87	41	down
Ibat.Brg_v3.09CG028940	63.1867	-1.72591	0.29993	-5.75439	8.69554e-09	4.27671e-07	24	29	28	88	150	93	down
Ibat.Brg_v3.09CG029830	27.7357	-1.42729	0.466611	-3.05884	0.00222193	0.0260441	23	14	6	36	61	41	down
Ibat.Brg_v3.09CG031420	15.4354	3.61448	1.07317	3.36803	0.000757062	0.011081	2	3	65	2	4	2	up
Ibat.Brg_v3.09DG001130	120.735	-1.01644	0.232201	-4.37742	1.20091e-05	0.000313791	101	53	69	166	255	134	down
Ibat.Brg_v3.09DG001410	28.684	-1.3019	0.462089	-2.81743	0.00484101	0.0470069	23	7	16	39	59	40	down
Ibat.Brg_v3.09DG001960	26.1435	1.54257	0.508322	3.03463	0.00240832	0.027748	28	27	49	16	12	15	up
Ibat.Brg_v3.09DG002540	29.8609	-1.55517	0.540846	-2.87543	0.00403471	0.0411526	6	27	9	40	41	61	down
Ibat.Brg_v3.09DG002850	7.98281	-3.32822	1.0275	-3.23915	0.00119887	0.0161227	2	0	2	10	27	14	down
Ibat.Brg_v3.09DG002930	205.741	1.28122	0.158532	8.08175	6.38441e-16	6.9543e-14	305	266	239	125	158	119	up
Ibat.Brg_v3.09DG003140	23.2566	2.37078	0.535927	4.4237	9.70262e-06	0.000260916	45	22	40	7	9	9	up
Ibat.Brg_v3.09DG003320	29.8988	4.63749	1.35662	3.41843	0.000629837	0.0095051	60	2	90	2	4	2	up
Ibat.Brg_v3.09DG004120	18.6698	-2.04892	0.580862	-3.52738	0.000419687	0.0067603	5	9	6	33	30	34	down
Ibat.Brg_v3.09DG004390	76.1595	-2.25499	0.352697	-6.39355	1.62074e-10	1.00353e-08	35	12	26	164	129	116	down
Ibat.Brg_v3.09DG004830	78.9782	-1.11586	0.292473	-3.81525	0.000136046	0.00260994	58	29	51	106	183	86	down
Ibat.Brg_v3.09DG005160	77.2474	-3.41046	1.07725	-3.16589	0.00154612	0.0196431	6	30	2	119	90	225	down
Ibat.Brg_v3.09DG006130	234.985	1.1729	0.207275	5.65866	1.52561e-08	7.24739e-07	309	354	243	126	152	191	up
Ibat.Brg_v3.09DG006310	8.57108	3.79461	1.0778	3.52069	0.000430423	0.00690816	30	6	10	2	2	0	up
Ibat.Brg_v3.09DG006440	18.6826	1.97827	0.617251	3.20496	0.00135081	0.0177262	21	49	14	11	8	6	up
Ibat.Brg_v3.09DG006870	43.2981	1.05435	0.367907	2.86581	0.00415941	0.042074	39	71	51	30	43	23	up
Ibat.Brg_v3.09DG007050	22.2055	-1.85368	0.574128	-3.22869	0.00124361	0.0165892	16	2	9	28	63	31	down
Ibat.Brg_v3.09DG007300	134.37	1.49769	0.223907	6.68887	2.24896e-11	1.5613e-09	226	167	160	54	94	87	up
Ibat.Brg_v3.09DG007950	39.432	1.35147	0.411941	3.28074	0.00103536	0.0143057	39	70	48	14	46	19	up
Ibat.Brg_v3.09DG008100	23.6464	1.86575	0.481763	3.87275	0.000107614	0.00213484	38	39	27	7	17	11	up
Ibat.Brg_v3.09DG008260	296.197	1.06648	0.143524	7.43066	1.08054e-13	9.67713e-12	437	353	327	159	284	206	up
Ibat.Brg_v3.09DG008490	136.586	1.2385	0.200984	6.16219	7.17448e-10	4.06974e-08	188	207	141	69	121	86	up
Ibat.Brg_v3.09DG009930	7.30254	-2.83989	0.991937	-2.86297	0.00419689	0.0423746	1	3	1	8	21	15	down
Ibat.Brg_v3.09DG010450	29.2103	1.68908	0.513796	3.28746	0.00101096	0.0140396	52	33	40	8	38	6	up
Ibat.Brg_v3.09DG011050	65.579	-6.22879	1.69635	-3.67188	0.000240773	0.00425683	2	3	0	42	12	313	down
Ibat.Brg_v3.09DG013720	464.147	-1.10528	0.350021	-3.15777	0.00158983	0.0200645	253	245	307	729	1129	372	down
Ibat.Brg_v3.09DG013770	144.542	-1.09863	0.244519	-4.49303	7.02163e-06	0.000194795	99	51	102	204	264	191	down
Ibat.Brg_v3.09DG017160	176.227	-2.13698	0.217143	-9.84134	7.47088e-23	1.38896e-20	53	68	59	249	361	339	down
Ibat.Brg_v3.09DG026170	63.3279	1.14854	0.32952	3.48548	0.000491258	0.00772548	94	94	58	21	71	45	up
Ibat.Brg_v3.09DG026570	15.3748	2.78605	0.750417	3.71267	0.000205087	0.00372133	16	20	35	4	1	7	up
Ibat.Brg_v3.09DG028520	13.9464	-2.7794	0.764679	-3.63472	0.000278281	0.00480397	2	6	2	15	60	16	down
Ibat.Brg_v3.09DG029340	47.2784	-1.0023	0.351335	-2.85284	0.00433299	0.0433849	45	25	19	62	83	66	down
Ibat.Brg_v3.09DG029530	622.47	-1.39682	0.0934222	-14.9517	1.51733e-50	1.00711e-47	342	327	283	874	1279	890	down
Ibat.Brg_v3.09DG031910	29.0543	1.54801	0.43927	3.52405	0.000425001	0.00683195	51	41	30	9	25	17	up
Ibat.Brg_v3.09EG001430	165.123	1.02433	0.192032	5.33417	9.59819e-08	3.98168e-06	215	242	162	129	161	81	up
Ibat.Brg_v3.09EG002270	63.4906	1.66827	0.323641	5.15471	2.54021e-07	9.64738e-06	136	80	59	31	50	24	up
Ibat.Brg_v3.09EG002740	281.912	-1.05804	0.142924	-7.40282	1.33321e-13	1.17913e-11	205	156	149	418	551	323	down
Ibat.Brg_v3.09EG002800	8.41754	2.51564	0.884296	2.8448	0.004444	0.0442221	8	15	16	2	6	1	up
Ibat.Brg_v3.09EG003110	28.3763	-2.39565	0.657909	-3.64131	0.000271257	0.00470099	11	11	4	26	152	13	down
Ibat.Brg_v3.09EG003920	413.141	1.04109	0.137771	7.55663	4.13658e-14	3.85538e-12	505	467	553	277	375	257	up
Ibat.Brg_v3.09EG003980	21.1623	-2.01849	0.647436	-3.11766	0.0018229	0.0223635	14	8	2	29	22	54	down
Ibat.Brg_v3.09EG004120	16.9131	-1.81124	0.60538	-2.99191	0.00277235	0.0309126	10	4	7	18	53	23	down
Ibat.Brg_v3.09EG004720	59.0568	-1.06401	0.363855	-2.92427	0.00345268	0.0366039	36	50	22	92	150	42	down
Ibat.Brg_v3.09EG005210	44.6063	1.39238	0.3792	3.67189	0.000240765	0.00425683	90	38	53	26	34	23	up
Ibat.Brg_v3.09EG005230	51.2727	1.21351	0.365164	3.3232	0.00088992	0.0126785	105	44	53	26	43	35	up
Ibat.Brg_v3.09EG005240	53.7372	1.07325	0.314988	3.40728	0.000656136	0.0098372	67	66	68	41	52	25	up
Ibat.Brg_v3.09EG005250	29.9656	2.60995	0.495748	5.26467	1.40443e-07	5.63836e-06	48	45	48	7	6	14	up
Ibat.Brg_v3.09EG005410	38.7473	1.42289	0.452196	3.14662	0.0016517	0.0206958	55	27	70	25	20	23	up
Ibat.Brg_v3.09EG005430	11.1636	2.19146	0.768223	2.85264	0.00433577	0.0434066	13	11	25	2	8	4	up
Ibat.Brg_v3.09EG005740	18.2966	-1.69946	0.598635	-2.83889	0.00452714	0.0447672	10	8	6	18	29	43	down
Ibat.Brg_v3.09EG006160	189.574	1.23453	0.176958	6.97642	3.02807e-12	2.34774e-10	269	260	214	92	203	99	up
Ibat.Brg_v3.09EG006300	22.5753	1.81075	0.496927	3.64389	0.000268545	0.00466652	29	35	33	8	19	8	up
Ibat.Brg_v3.09EG006620	20.4096	2.21412	0.563571	3.92873	8.53962e-05	0.00174729	30	31	32	3	17	6	up
Ibat.Brg_v3.09EG007220	19.8796	1.55756	0.551801	2.82268	0.0047624	0.0464532	45	20	19	12	10	11	up
Ibat.Brg_v3.09EG007240	144.583	-1.16627	0.197209	-5.91387	3.3417e-09	1.73485e-07	84	96	68	227	267	177	down
Ibat.Brg_v3.09EG007920	8.97073	2.74504	0.837243	3.27866	0.00104302	0.0143863	14	14	15	2	4	2	up
Ibat.Brg_v3.09EG008230	61.9153	1.9944	0.320412	6.2245	4.83084e-10	2.79386e-08	116	76	83	24	28	30	up
Ibat.Brg_v3.09EG008620	14.9676	2.5844	0.700069	3.69164	0.000222811	0.00399396	43	14	16	4	4	6	up
Ibat.Brg_v3.09EG009120	148.665	1.09739	0.235661	4.65664	3.2141e-06	9.71516e-05	257	167	147	61	167	101	up
Ibat.Brg_v3.09EG009230	40.487	1.90571	0.389459	4.89322	9.92e-07	3.38548e-05	73	64	43	24	24	10	up
Ibat.Brg_v3.09EG009820	12.5452	2.18985	0.721381	3.03563	0.00240034	0.0276732	23	16	18	1	6	8	up
Ibat.Brg_v3.09EG009900	33.0853	1.47443	0.424799	3.47089	0.000518735	0.00807111	51	52	33	25	16	16	up
Ibat.Brg_v3.09EG010380	10.1942	-2.23715	0.771668	-2.89911	0.00374222	0.0388329	4	4	2	14	22	20	down
Ibat.Brg_v3.09EG010450	11.1277	2.24727	0.751697	2.98959	0.00279349	0.0311157	25	19	9	3	9	2	up
Ibat.Brg_v3.09EG011170	32.9773	1.81117	0.409823	4.41941	9.89711e-06	0.000265543	50	59	35	12	23	15	up
Ibat.Brg_v3.09EG013110	109.272	-1.04952	0.28935	-3.62716	0.00028655	0.00490776	89	76	37	99	206	189	down
Ibat.Brg_v3.09EG014130	17.3605	-1.90793	0.605995	-3.14843	0.0016415	0.0206054	11	8	2	30	47	19	down
Ibat.Brg_v3.09EG014190	7.98838	-3.28717	1.14362	-2.87435	0.00404854	0.0412461	0	2	2	32	10	4	down
Ibat.Brg_v3.09EG014270	11.9173	2.44538	0.778857	3.1397	0.00169118	0.0210826	13	21	21	6	7	0	up
Ibat.Brg_v3.09EG016090	672.205	-1.01478	0.0889171	-11.4126	3.61679e-30	1.00338e-27	437	438	364	842	1403	832	down
Ibat.Brg_v3.09EG016450	78.8113	-1.00819	0.268174	-3.75945	0.000170289	0.00317092	58	56	33	124	138	91	down
Ibat.Brg_v3.09EG016560	6.78657	-6.07655	1.45612	-4.1731	3.00477e-05	0.000708965	0	0	0	14	9	19	down
Ibat.Brg_v3.09EG018100	29.341	1.19098	0.416556	2.85911	0.00424838	0.0427365	49	33	32	17	24	19	up
Ibat.Brg_v3.09EG018140	106.916	-1.17687	0.223514	-5.2653	1.39959e-07	5.62211e-06	62	58	61	143	203	151	down
Ibat.Brg_v3.09EG018370	61.4579	-1.00296	0.285378	-3.5145	0.000440587	0.00704423	43	38	33	73	124	82	down
Ibat.Brg_v3.09EG018440	83.8278	1.37882	0.310792	4.43647	9.14476e-06	0.000247619	128	100	108	22	82	57	up
Ibat.Brg_v3.09EG018550	24.1734	-3.40962	0.660406	-5.16292	2.43121e-07	9.2681e-06	7	5	0	47	93	21	down
Ibat.Brg_v3.09EG022050	21.3733	-2.83512	0.601578	-4.7128	2.44341e-06	7.64453e-05	10	3	2	41	61	28	down
Ibat.Brg_v3.09EG023070	6.73457	-5.0764	1.42755	-3.55602	0.000376509	0.00617829	1	0	0	19	14	10	down
Ibat.Brg_v3.09EG024030	139.61	1.0666	0.187607	5.68527	1.30607e-08	6.26312e-07	195	186	146	84	129	92	up
Ibat.Brg_v3.09EG025690	15.2166	-2.16046	0.676536	-3.19342	0.00140598	0.0182512	8	6	2	17	58	17	down
Ibat.Brg_v3.09EG027260	58.4288	1.3204	0.33617	3.92779	8.57311e-05	0.00175202	65	95	71	20	60	36	up
Ibat.Brg_v3.09EG027630	50.9606	-1.5774	0.344161	-4.58332	4.57647e-06	0.000133541	31	15	25	75	121	66	down
Ibat.Brg_v3.09EG027640	34.1564	-1.47131	0.413618	-3.55717	0.000374866	0.0061556	21	10	19	45	77	49	down
Ibat.Brg_v3.09EG028560	55.7722	-1.79044	0.50169	-3.56882	0.000358598	0.0059296	20	33	17	19	183	108	down
Ibat.Brg_v3.09EG028610	213.043	-1.17316	0.186569	-6.28811	3.21361e-10	1.90988e-08	144	150	76	266	502	258	down
Ibat.Brg_v3.09EG030180	23.0577	-1.797	0.55578	-3.23329	0.00122372	0.0163707	15	8	6	25	36	54	down
Ibat.Brg_v3.09EG030720	27.5872	-1.34299	0.477756	-2.81104	0.00493818	0.0477676	22	13	9	55	40	34	down
Ibat.Brg_v3.09FG000510	17.4025	-2.38303	0.772325	-3.08552	0.00203194	0.0243066	2	5	8	56	36	6	down
Ibat.Brg_v3.09FG001230	35.1002	-1.28534	0.452452	-2.84083	0.00449961	0.0445963	25	9	22	50	49	61	down
Ibat.Brg_v3.09FG001370	6.0252	-3.92427	1.36212	-2.881	0.00396418	0.040609	0	0	2	11	27	4	down
Ibat.Brg_v3.09FG002240	20.2172	1.44968	0.518484	2.79599	0.00517415	0.0494507	40	24	20	10	20	8	up
Ibat.Brg_v3.09FG003560	235.301	1.3841	0.227106	6.09449	1.09787e-09	6.11537e-08	507	260	202	135	158	139	up
Ibat.Brg_v3.09FG003600	26.3785	1.78337	0.571649	3.1197	0.00181038	0.0222484	45	53	18	20	5	12	up
Ibat.Brg_v3.09FG003620	287.775	-1.5335	0.145241	-10.5583	4.64871e-26	1.02214e-23	170	124	118	403	602	436	down
Ibat.Brg_v3.09FG003750	16.3527	1.6192	0.571859	2.83147	0.00463346	0.0455035	21	23	24	6	15	7	up
Ibat.Brg_v3.09FG004050	25.0367	-1.98201	0.629763	-3.14724	0.00164822	0.0206704	2	18	8	29	100	21	down
Ibat.Brg_v3.09FG004140	35.5063	1.4479	0.40006	3.6192	0.000295513	0.00503293	39	65	40	18	26	20	up
Ibat.Brg_v3.09FG005210	27.9343	2.40757	0.608261	3.95811	7.5544e-05	0.00157013	99	23	16	11	12	7	up
Ibat.Brg_v3.09FG005890	73.3879	-1.12427	0.351789	-3.19586	0.00139416	0.0181509	52	38	39	124	192	43	down
Ibat.Brg_v3.09FG005910	236.94	1.26604	0.152606	8.29618	1.07511e-16	1.22954e-14	374	320	244	125	204	143	up
Ibat.Brg_v3.09FG006560	71.1537	1.61443	0.282994	5.7048	1.16481e-08	5.61987e-07	93	113	91	42	51	26	up
Ibat.Brg_v3.09FG006600	17.8158	2.00923	0.660697	3.04107	0.00235737	0.0272583	36	25	19	14	2	6	up
Ibat.Brg_v3.09FG007380	25.3218	1.41465	0.460933	3.06911	0.00214698	0.0253539	35	33	34	16	24	8	up
Ibat.Brg_v3.09FG007830	36.2521	-1.10809	0.39326	-2.81771	0.0048367	0.0469715	31	20	14	39	79	52	down
Ibat.Brg_v3.09FG008240	19.4197	-1.76063	0.552317	-3.18772	0.00143398	0.0185604	10	9	6	24	62	22	down
Ibat.Brg_v3.09FG008410	41.4426	1.28032	0.389125	3.29026	0.00100096	0.0139279	83	56	29	27	34	21	up
Ibat.Brg_v3.09FG008490	347.769	1.10427	0.329296	3.35343	0.000798171	0.0115804	328	657	336	216	338	200	up
Ibat.Brg_v3.09FG010760	177.859	1.30404	0.204987	6.36156	1.9972e-10	1.22279e-08	246	212	239	78	140	125	up
Ibat.Brg_v3.09FG010840	14.6021	-2.43616	0.805364	-3.02492	0.00248701	0.0284287	8	3	2	49	27	6	down
Ibat.Brg_v3.09FG012780	25.0089	1.46231	0.491421	2.97568	0.00292344	0.0322245	37	31	33	21	11	11	up
Ibat.Brg_v3.09FG013590	381.802	-1.24045	0.150321	-8.25202	1.55743e-16	1.7557e-14	276	197	164	643	726	437	down
Ibat.Brg_v3.09FG015390	7.69275	-4.38977	1.50066	-2.92522	0.00344209	0.0365151	0	2	0	2	59	2	down
Ibat.Brg_v3.09FG016030	66.8191	-1.71314	0.3052	-5.61318	1.98643e-08	9.23878e-07	36	25	26	79	153	115	down
Ibat.Brg_v3.09FG016360	25.4286	-2.12781	0.508563	-4.18396	2.8648e-05	0.000679099	6	9	11	41	77	28	down
Ibat.Brg_v3.09FG018090	14.4924	-1.80311	0.618077	-2.91729	0.00353085	0.037204	7	6	5	27	31	18	down
Ibat.Brg_v3.09FG018930	66.0893	-1.20595	0.31479	-3.83096	0.000127643	0.00246672	37	25	47	82	134	95	down
Ibat.Brg_v3.09FG020050	24.7241	-2.47296	0.586324	-4.21774	2.4676e-05	0.0005971	11	4	6	59	28	44	down
Ibat.Brg_v3.09FG027580	13.3925	-2.11576	0.683556	-3.09523	0.00196661	0.0237451	4	6	4	27	37	12	down
Ibat.Brg_v3.09FG027840	39.7847	-1.09642	0.370053	-2.96286	0.00304794	0.0332103	32	20	19	45	78	60	down
Ibat.Brg_v3.09FG027850	29.7924	-1.23202	0.440566	-2.79645	0.00516671	0.0493996	14	16	19	33	81	34	down
Ibat.Brg_v3.09FG029280	21.6826	1.75724	0.568786	3.08945	0.00200525	0.0240765	22	20	47	7	17	10	up
Ibat.Brg_v3.09FG029320	81.2922	1.06332	0.293889	3.61811	0.000296759	0.00504811	76	99	123	59	76	43	up
Ibat.Brg_v3.09FG029890	15.5395	-1.96918	0.675941	-2.91324	0.00357701	0.0375243	12	2	4	15	43	28	down
Ibat.Brg_v3.09FG029900	22.1216	-2.45451	0.814338	-3.01412	0.00257725	0.029225	4	9	6	9	141	7	down
Ibat.Brg_v3.09FG029920	334.389	1.34538	0.361724	3.71935	0.000199733	0.00363905	415	374	519	134	384	158	up
Ibat.Brg_v3.09FG029960	22.203	1.58284	0.487438	3.24726	0.00116521	0.0157746	30	32	30	8	18	12	up
Ibat.Brg_v3.10AG000710	95.1035	-1.40733	0.292679	-4.80845	1.52103e-06	4.94614e-05	32	45	64	148	219	107	down
Ibat.Brg_v3.10AG001050	16.6279	-2.25639	0.606131	-3.72261	0.00019717	0.00359698	7	4	5	32	36	24	down
Ibat.Brg_v3.10AG001860	80.1688	-1.25835	0.316319	-3.97812	6.94632e-05	0.00145826	23	51	54	113	164	105	down
Ibat.Brg_v3.10AG002280	34.4465	1.1316	0.387217	2.92239	0.00347362	0.036749	41	56	35	22	34	18	up
Ibat.Brg_v3.10AG002770	404.892	1.06163	0.160894	6.59833	4.15822e-11	2.78601e-09	514	606	411	206	506	216	up
Ibat.Brg_v3.10AG003280	23.531	-1.48687	0.500309	-2.97191	0.00295953	0.0325163	18	8	9	30	66	27	down
Ibat.Brg_v3.10AG003330	23.7769	-1.76761	0.509422	-3.46984	0.000520766	0.00809118	12	10	8	31	39	49	down
Ibat.Brg_v3.10AG003890	16.5608	2.57519	0.644988	3.99262	6.53474e-05	0.00138165	29	18	31	3	11	3	up
Ibat.Brg_v3.10AG007280	9.55361	-2.51974	0.88887	-2.83477	0.00458588	0.0451496	6	0	2	14	18	21	down
Ibat.Brg_v3.10AG015580	61.0875	-1.18759	0.299405	-3.96651	7.29333e-05	0.00152166	41	36	27	79	108	95	down
Ibat.Brg_v3.10AG016820	37.3326	-1.29326	0.432775	-2.98831	0.00280526	0.0312121	34	11	16	38	80	62	down
Ibat.Brg_v3.10AG017920	310.578	-3.06225	0.153454	-19.9555	1.34228e-88	2.38323e-85	73	58	54	550	814	518	down
Ibat.Brg_v3.10AG019710	44.877	1.37711	0.39607	3.47694	0.00050717	0.00792328	89	65	32	16	48	24	up
Ibat.Brg_v3.10AG019950	29.245	-2.08524	0.596466	-3.49599	0.000472309	0.00747556	5	12	13	45	23	75	down
Ibat.Brg_v3.10AG020280	64.9927	-1.32579	0.451628	-2.93559	0.00332916	0.0355812	24	43	35	122	191	24	down
Ibat.Brg_v3.10AG020350	19.5087	-2.46075	0.865001	-2.8448	0.00444395	0.0442221	1	7	8	76	28	3	down
Ibat.Brg_v3.10AG021370	43.3899	-1.18197	0.396468	-2.98125	0.00287077	0.0317673	44	20	12	65	82	56	down
Ibat.Brg_v3.10BG000640	42.5947	-2.13752	0.435318	-4.91025	9.09591e-07	3.13893e-05	21	9	14	99	98	39	down
Ibat.Brg_v3.10BG001000	9.03951	-3.42432	1.07353	-3.18977	0.00142384	0.018446	0	0	4	19	11	21	down
Ibat.Brg_v3.10BG002580	145.858	1.23775	0.195524	6.33042	2.4449e-10	1.47275e-08	189	211	169	70	138	89	up
Ibat.Brg_v3.10BG002750	10.4347	2.41299	0.752955	3.20469	0.00135207	0.0177362	21	14	14	3	4	4	up
Ibat.Brg_v3.10BG003050	163.383	1.04065	0.178179	5.84048	5.20518e-09	2.6424e-07	246	197	171	98	152	111	up
Ibat.Brg_v3.10BG003950	23.54	-1.91397	0.602211	-3.17823	0.00148175	0.0190125	6	2	18	37	53	35	down
Ibat.Brg_v3.10BG004060	100.991	1.86788	0.241527	7.73361	1.04537e-14	1.02403e-12	165	128	146	38	71	40	up
Ibat.Brg_v3.10BG004310	82.6142	1.14031	0.28471	4.00515	6.19772e-05	0.00131903	112	113	90	48	51	68	up
Ibat.Brg_v3.10BG005390	25.7304	-2.18484	0.754234	-2.89677	0.00377024	0.0390723	6	16	4	12	18	95	down
Ibat.Brg_v3.10BG005800	13.4561	-3.25421	1.04035	-3.128	0.00175998	0.0217495	3	0	4	8	91	3	down
Ibat.Brg_v3.10BG005920	8.53745	-3.94022	1.33221	-2.95766	0.00309985	0.0336417	3	0	0	8	2	36	down
Ibat.Brg_v3.10BG006250	10.256	-4.78327	1.32946	-3.59791	0.000320781	0.00540494	0	2	0	5	15	41	down
Ibat.Brg_v3.10BG006320	19.1967	4.79875	1.58223	3.0329	0.00242212	0.0278609	58	2	42	2	0	2	up
Ibat.Brg_v3.10BG007000	19.4518	-3.48303	0.808116	-4.31006	1.63213e-05	0.000413536	4	3	2	58	64	5	down
Ibat.Brg_v3.10BG008300	10.6516	-2.93843	0.847881	-3.46562	0.000529011	0.00819776	3	4	0	16	25	22	down
Ibat.Brg_v3.10BG008890	101.735	-1.04237	0.249644	-4.17545	2.97399e-05	0.000702638	79	60	47	128	163	160	down
Ibat.Brg_v3.10BG009730	16.7158	2.61352	0.638773	4.09147	4.28646e-05	0.000963978	28	26	25	4	3	8	up
Ibat.Brg_v3.10BG012000	42.9497	-1.25858	0.380513	-3.3076	0.000940982	0.0132544	27	17	26	42	108	61	down
Ibat.Brg_v3.10BG016260	22.504	1.44152	0.50422	2.85892	0.00425092	0.0427499	43	22	27	8	18	15	up
Ibat.Brg_v3.10BG017480	14.4778	3.04896	0.87913	3.46816	0.000524039	0.00813314	14	56	4	4	2	4	up
Ibat.Brg_v3.10BG018870	25.4553	1.625	0.545994	2.97622	0.00291828	0.0321776	50	36	24	9	34	4	up
Ibat.Brg_v3.10BG019080	63.8226	1.04271	0.306725	3.39951	0.00067507	0.01007	110	57	73	45	62	35	up
Ibat.Brg_v3.10BG020200	16.8694	-3.85927	0.977719	-3.94722	7.90625e-05	0.0016337	2	2	2	79	11	7	down
Ibat.Brg_v3.10BG021540	24.4399	2.93249	0.587924	4.98786	6.10503e-07	2.1777e-05	56	40	27	9	11	0	up
Ibat.Brg_v3.10BG022220	28.1155	1.4704	0.453684	3.24102	0.00119104	0.0160508	56	32	29	17	26	9	up
Ibat.Brg_v3.10BG022760	196.03	1.11364	0.176758	6.30037	2.96933e-10	1.7766e-08	270	285	196	140	196	90	up
Ibat.Brg_v3.10BG022850	6.74723	3.07196	1.05268	2.91823	0.00352028	0.0371376	6	9	17	1	3	1	up
Ibat.Brg_v3.10BG023850	16.2447	-2.36115	0.646136	-3.65426	0.000257922	0.00451284	5	8	2	32	46	17	down
Ibat.Brg_v3.10BG024520	69.0828	1.45155	0.280084	5.18256	2.18863e-07	8.42472e-06	105	108	71	30	60	37	up
Ibat.Brg_v3.10BG026480	37.6073	1.89395	0.43209	4.38322	1.16938e-05	0.00030623	45	46	69	23	19	11	up
Ibat.Brg_v3.10BG026790	11.788	2.39227	0.804993	2.97179	0.00296072	0.0325244	14	30	12	4	10	0	up
Ibat.Brg_v3.10CG001150	37.2279	1.46859	0.414184	3.54575	0.000391502	0.00637864	38	65	48	12	37	20	up
Ibat.Brg_v3.10CG001330	32.6334	1.19518	0.417987	2.85936	0.00424497	0.0427204	54	29	43	23	31	14	up
Ibat.Brg_v3.10CG002560	67.6234	-1.24224	0.313917	-3.95724	7.58213e-05	0.00157497	37	54	22	115	125	79	down
Ibat.Brg_v3.10CG003020	41.6514	-1.20311	0.357619	-3.36421	0.000767639	0.0112107	31	22	18	55	99	48	down
Ibat.Brg_v3.10CG003140	38.0714	-1.23986	0.432578	-2.8662	0.00415427	0.0420339	33	9	21	48	67	62	down
Ibat.Brg_v3.10CG004040	8.60822	-2.80639	0.900084	-3.11793	0.00182129	0.0223592	2	2	2	17	27	9	down
Ibat.Brg_v3.10CG004660	46.394	1.15645	0.380501	3.03929	0.00237134	0.0273842	93	59	32	24	53	24	up
Ibat.Brg_v3.10CG005090	9.26393	-2.66492	0.851052	-3.13132	0.0017402	0.0215575	3	2	2	17	17	18	down
Ibat.Brg_v3.10CG005530	109.232	1.97545	0.327145	6.03845	1.55601e-09	8.50714e-08	219	91	171	30	54	62	up
Ibat.Brg_v3.10CG015520	33.0838	-1.68968	0.425857	-3.96771	7.25669e-05	0.00151535	14	14	15	58	53	53	down
Ibat.Brg_v3.10CG015860	7.67633	-6.26816	1.39507	-4.49308	7.02011e-06	0.000194795	0	0	0	17	22	13	down
Ibat.Brg_v3.10CG016350	31.948	-1.16422	0.413146	-2.81794	0.00483325	0.0469508	18	14	22	39	67	44	down
Ibat.Brg_v3.10CG016990	15.8336	-1.72327	0.612902	-2.81165	0.00492879	0.0476897	5	6	9	32	31	18	down
Ibat.Brg_v3.10CG017030	62.9602	-2.80687	0.373338	-7.5183	5.54911e-14	5.13149e-12	11	25	8	99	139	127	down
Ibat.Brg_v3.10CG019190	53.8331	-1.0484	0.316811	-3.30922	0.00093557	0.0131965	32	31	34	60	123	68	down
Ibat.Brg_v3.10CG020250	24.5593	1.71127	0.491028	3.48507	0.000492004	0.00773398	26	36	40	10	14	14	up
Ibat.Brg_v3.10CG021590	15.3636	3.71894	0.790654	4.70362	2.55591e-06	7.96641e-05	22	36	22	1	7	0	up
Ibat.Brg_v3.10CG022170	38.9117	1.70636	0.383022	4.455	8.38924e-06	0.000227928	47	63	54	14	28	20	up
Ibat.Brg_v3.10CG022220	107.463	-1.41894	0.288948	-4.91072	9.07418e-07	3.13448e-05	52	72	39	188	142	171	down
Ibat.Brg_v3.10CG024180	6.07985	-4.02378	1.32172	-3.04435	0.00233182	0.0270333	1	1	0	15	19	6	down
Ibat.Brg_v3.10CG024260	46.2376	-1.42817	0.343216	-4.16115	3.16651e-05	0.000741706	22	30	18	66	108	58	down
Ibat.Brg_v3.10CG026140	32.8761	-1.31395	0.438514	-2.99636	0.00273224	0.0305773	23	9	20	37	68	53	down
Ibat.Brg_v3.10CG027470	59.284	-1.38882	0.46158	-3.00884	0.00262248	0.029648	16	55	20	138	62	71	down
Ibat.Brg_v3.10DG000480	22.0473	-4.5415	0.7792	-5.82841	5.59585e-09	2.82057e-07	2	0	3	39	62	42	down
Ibat.Brg_v3.10DG001180	42.3085	1.91481	0.461503	4.14906	3.33838e-05	0.000776332	63	36	81	22	12	22	up
Ibat.Brg_v3.10DG001890	12.5779	-2.24542	0.736965	-3.04685	0.00231255	0.0268669	3	3	6	16	47	13	down
Ibat.Brg_v3.10DG004420	20.4918	-1.7271	0.565133	-3.05609	0.00224244	0.0262412	3	14	9	29	45	32	down
Ibat.Brg_v3.10DG004460	25.2747	-1.61225	0.505535	-3.18919	0.00142671	0.018473	8	13	13	55	42	28	down
Ibat.Brg_v3.10DG004520	97.013	1.32961	0.270464	4.91604	8.83133e-07	3.05952e-05	164	123	101	59	53	67	up
Ibat.Brg_v3.10DG005120	64.7429	-1.49553	0.408353	-3.66236	0.000249904	0.0043942	67	16	15	82	156	92	down
Ibat.Brg_v3.10DG006300	38.4463	-1.27674	0.440074	-2.9012	0.0037174	0.0386544	15	33	15	40	119	39	down
Ibat.Brg_v3.10DG007240	10.8281	-3.17547	1.05505	-3.00977	0.0026145	0.0295671	4	0	2	4	12	43	down
Ibat.Brg_v3.10DG007440	38.1519	1.40282	0.399525	3.51123	0.00044604	0.0071154	57	42	54	12	39	22	up
Ibat.Brg_v3.10DG007910	89.2853	1.21264	0.277846	4.36445	1.27443e-05	0.000330812	159	103	89	37	79	66	up
Ibat.Brg_v3.10DG008690	88.1401	-1.78363	0.333857	-5.34249	9.16806e-08	3.8211e-06	41	59	13	165	170	120	down
Ibat.Brg_v3.10DG012850	79.3785	1.26647	0.272357	4.65004	3.31876e-06	9.99569e-05	109	100	100	45	52	56	up
Ibat.Brg_v3.10DG013540	53.9018	1.14738	0.324896	3.53154	0.000413146	0.0066807	75	82	52	25	64	29	up
Ibat.Brg_v3.10DG014790	86.4162	1.40253	0.285601	4.91079	9.07094e-07	3.13448e-05	127	118	103	71	53	33	up
Ibat.Brg_v3.10DG015930	111.995	1.0216	0.250597	4.07665	4.56886e-05	0.00101559	160	133	123	85	70	84	up
Ibat.Brg_v3.10DG017480	75.4101	2.03489	0.319873	6.36155	1.99724e-10	1.22279e-08	100	141	97	24	64	18	up
Ibat.Brg_v3.10DG017670	25.3445	-1.73615	0.473045	-3.67016	0.000242402	0.00428244	13	14	6	43	55	34	down
Ibat.Brg_v3.10DG017750	14.5448	2.47798	0.767557	3.2284	0.00124484	0.0165994	25	11	31	0	11	5	up
Ibat.Brg_v3.10DG019500	29.6933	-2.69268	0.664988	-4.04922	5.13877e-05	0.00112259	7	6	9	20	169	18	down
Ibat.Brg_v3.10DG019740	190.329	-3.27656	0.466034	-7.03072	2.05471e-12	1.61243e-10	62	21	19	290	526	359	down
Ibat.Brg_v3.10DG019970	56.3365	1.22083	0.411352	2.96786	0.00299885	0.0327911	142	44	41	30	44	39	up
Ibat.Brg_v3.10DG020040	34.627	1.44783	0.483521	2.99436	0.00275024	0.0307078	29	41	66	16	41	10	up
Ibat.Brg_v3.10DG021400	26.028	-1.54381	0.544731	-2.83408	0.0045958	0.0452069	20	14	4	35	33	55	down
Ibat.Brg_v3.10DG021780	110.752	1.30981	0.217684	6.01703	1.77652e-09	9.58725e-08	165	155	120	61	83	69	up
Ibat.Brg_v3.10DG023110	37.7165	1.62366	0.373121	4.35156	1.35171e-05	0.000349084	61	51	47	17	32	15	up
Ibat.Brg_v3.10DG023550	5.4916	4.26815	1.42489	2.99542	0.00274067	0.0306379	8	18	4	0	2	0	up
Ibat.Brg_v3.10DG023640	11.1852	3.87867	0.938665	4.13211	3.59447e-05	0.00082856	14	33	12	2	3	0	up
Ibat.Brg_v3.10DG023740	56.0956	-1.45844	0.419446	-3.47705	0.000506956	0.00792275	31	40	14	121	129	35	down
Ibat.Brg_v3.10DG024030	61.5449	1.64231	0.424728	3.86672	0.000110308	0.0021765	46	63	136	28	35	35	up
Ibat.Brg_v3.10DG024190	63.6243	1.14396	0.291832	3.91993	8.8576e-05	0.00180042	72	85	84	39	64	33	up
Ibat.Brg_v3.10DG024290	21.0554	-1.61557	0.576112	-2.80427	0.00504306	0.0484981	4	10	14	26	66	22	down
Ibat.Brg_v3.10DG025540	72.3481	-1.33322	0.401178	-3.32326	0.000889721	0.0126782	65	23	28	92	81	152	down
Ibat.Brg_v3.10EG000220	17.6597	2.71777	0.762681	3.56345	0.000366017	0.00603542	69	15	7	6	7	3	up
Ibat.Brg_v3.10EG000270	9.88707	2.7879	0.989571	2.81728	0.00484317	0.0470086	4	7	33	2	6	1	up
Ibat.Brg_v3.10EG000360	12.0805	-2.84959	0.892541	-3.19267	0.00140964	0.0182921	4	0	4	13	14	38	down
Ibat.Brg_v3.10EG000590	10.1683	-2.56006	0.870437	-2.94112	0.0032703	0.0350576	1	4	3	13	13	28	down
Ibat.Brg_v3.10EG000640	8.52492	-3.07235	0.934636	-3.28721	0.00101185	0.0140437	2	1	2	13	21	17	down
Ibat.Brg_v3.10EG001270	21.5002	-1.93627	0.541159	-3.57801	0.000346225	0.00575953	14	4	7	39	47	29	down
Ibat.Brg_v3.10EG002250	59.9397	-1.16603	0.300493	-3.8804	0.000104284	0.00207748	33	44	26	88	111	79	down
Ibat.Brg_v3.10EG002490	58.8788	1.2904	0.302016	4.27263	1.93177e-05	0.000480709	83	88	62	42	42	30	up
Ibat.Brg_v3.10EG002990	162.514	1.26785	0.188775	6.71621	1.86517e-11	1.30764e-09	249	242	154	106	128	87	up
Ibat.Brg_v3.10EG004100	72.375	1.16571	0.298544	3.90464	9.43675e-05	0.00190397	104	74	97	55	47	44	up
Ibat.Brg_v3.10EG004420	12.1444	-2.45887	0.810311	-3.03448	0.00240952	0.0277574	3	0	7	22	37	13	down
Ibat.Brg_v3.10EG004480	33.2872	-1.82462	0.44877	-4.06582	4.78638e-05	0.00105601	11	11	18	35	91	54	down
Ibat.Brg_v3.10EG004660	125.396	-1.06181	0.296795	-3.5776	0.000346767	0.00576483	65	44	109	191	215	157	down
Ibat.Brg_v3.10EG007120	80.6676	-1.32266	0.390517	-3.38694	0.000706766	0.0104616	42	43	42	210	104	59	down
Ibat.Brg_v3.10EG014570	48.4463	-1.32966	0.404174	-3.28982	0.0010025	0.0139384	43	14	21	74	130	42	down
Ibat.Brg_v3.10EG014860	53.0867	1.20353	0.362675	3.31847	0.000905109	0.0128433	73	60	70	28	29	46	up
Ibat.Brg_v3.10EG017110	78.2905	-4.31198	0.404203	-10.6679	1.43905e-26	3.26522e-24	11	6	4	181	183	131	down
Ibat.Brg_v3.10EG017290	110.208	-2.74894	0.582643	-4.71806	2.38104e-06	7.47245e-05	32	42	8	164	221	242	down
Ibat.Brg_v3.10EG017470	25.4657	-3.17909	0.612865	-5.18727	2.13404e-07	8.2414e-06	8	0	6	62	55	35	down
Ibat.Brg_v3.10EG017960	120.985	1.09587	0.209594	5.22854	1.70853e-07	6.76366e-06	195	151	117	81	109	71	up
Ibat.Brg_v3.10EG018650	18.5674	3.21085	0.659875	4.86584	1.13973e-06	3.83619e-05	18	40	33	4	4	4	up
Ibat.Brg_v3.10EG018800	71.2229	1.81048	0.284939	6.35393	2.09876e-10	1.28053e-08	128	112	73	32	52	25	up
Ibat.Brg_v3.10EG019210	58.3359	1.04199	0.335631	3.10457	0.00190556	0.0231695	93	68	59	22	57	50	up
Ibat.Brg_v3.10EG019710	103.424	1.02471	0.277943	3.68676	0.000227128	0.00405917	100	195	92	73	95	62	up
Ibat.Brg_v3.10EG020060	108.52	1.09857	0.245842	4.46863	7.8724e-06	0.000215535	112	158	137	54	113	70	up
Ibat.Brg_v3.10EG020340	14.2507	-2.08984	0.710356	-2.94197	0.00326136	0.0349671	6	5	4	22	14	35	down
Ibat.Brg_v3.10EG020820	29.3522	1.95517	0.474201	4.12309	3.73827e-05	0.000855875	64	36	32	18	17	6	up
Ibat.Brg_v3.10EG021310	35.6644	-1.30246	0.446594	-2.91644	0.00354051	0.0372901	16	16	24	28	79	65	down
Ibat.Brg_v3.10EG022950	131.159	1.11888	0.199591	5.60585	2.07241e-08	9.59467e-07	158	180	158	82	117	80	up
Ibat.Brg_v3.10EG022960	205.651	1.18125	0.161515	7.31355	2.60173e-13	2.23158e-11	321	277	204	121	200	111	up
Ibat.Brg_v3.10EG023420	33.0184	1.89018	0.428169	4.41457	1.01212e-05	0.000270532	45	43	54	19	18	10	up
Ibat.Brg_v3.10EG023430	612.018	1.19619	0.0917281	13.0406	7.18748e-39	3.05661e-36	855	824	691	346	540	373	up
Ibat.Brg_v3.10EG023680	28.8402	-1.2443	0.426531	-2.91725	0.00353129	0.037204	20	17	11	44	51	40	down
Ibat.Brg_v3.10EG023860	83.3488	2.36122	0.667228	3.53885	0.000401872	0.00652066	114	203	77	10	68	23	up
Ibat.Brg_v3.10EG023870	35.8585	2.04307	0.462667	4.41586	1.0061e-05	0.000269532	28	60	67	16	19	12	up
Ibat.Brg_v3.10EG023890	20.3314	1.75394	0.566864	3.09411	0.00197406	0.0238142	23	24	38	10	19	4	up
Ibat.Brg_v3.10EG024070	103.34	-1.21198	0.353227	-3.43116	0.000600998	0.0091359	86	45	44	151	96	201	down
Ibat.Brg_v3.10FG000810	20.0213	-2.55774	0.824168	-3.10342	0.00191297	0.0232237	2	9	5	62	56	2	down
Ibat.Brg_v3.10FG001710	77.6828	1.24069	0.255294	4.85985	1.17474e-06	3.92797e-05	118	106	81	48	61	46	up
Ibat.Brg_v3.10FG001720	45.3105	1.24576	0.358624	3.47372	0.000513291	0.00799955	60	51	64	35	38	18	up
Ibat.Brg_v3.10FG002510	80.99	-1.84237	0.282643	-6.51835	7.10873e-11	4.63601e-09	24	36	37	124	203	108	down
Ibat.Brg_v3.10FG003050	298.797	1.39207	0.164606	8.45696	2.7443e-17	3.29223e-15	487	411	314	212	200	137	up
Ibat.Brg_v3.10FG003250	50.6171	-1.25502	0.427847	-2.93335	0.00335328	0.0357636	24	52	9	70	87	79	down
Ibat.Brg_v3.10FG003550	23.3151	2.04205	0.501625	4.07088	4.68367e-05	0.00103754	43	29	32	8	10	12	up
Ibat.Brg_v3.10FG004760	12.2876	-3.33038	0.915359	-3.63834	0.000274403	0.00474857	0	2	4	20	56	8	down
Ibat.Brg_v3.10FG005700	16.4009	-2.91859	0.832499	-3.50581	0.000455216	0.00724063	2	0	8	40	14	34	down
Ibat.Brg_v3.10FG006770	36.7753	1.72804	0.529496	3.26355	0.00110024	0.0150383	54	20	77	9	21	26	up
Ibat.Brg_v3.10FG009720	86.7349	1.0201	0.241387	4.226	2.37887e-05	0.000578652	105	121	96	62	79	52	up
Ibat.Brg_v3.10FG010710	36.1173	-1.07695	0.384453	-2.80125	0.00509052	0.0488288	25	21	19	49	88	35	down
Ibat.Brg_v3.10FG015820	77.9672	1.08812	0.274406	3.96535	7.32885e-05	0.00152772	116	107	75	34	84	54	up
Ibat.Brg_v3.10FG016010	54.8373	1.73519	0.344517	5.03657	4.73941e-07	1.72523e-05	108	56	72	20	45	23	up
Ibat.Brg_v3.10FG016980	75.1247	1.07559	0.267791	4.01653	5.90623e-05	0.00126382	113	103	71	49	83	36	up
Ibat.Brg_v3.10FG017440	91.2302	-1.04893	0.285441	-3.67476	0.000238073	0.00421644	44	49	69	97	220	112	down
Ibat.Brg_v3.10FG017540	20.3343	1.84356	0.548308	3.36226	0.000773062	0.0112783	27	32	29	12	16	3	up
Ibat.Brg_v3.10FG017870	36.8358	-1.50556	0.437386	-3.44217	0.00057707	0.00883075	25	25	5	55	73	55	down
Ibat.Brg_v3.10FG017970	11.7461	2.78899	0.748895	3.72414	0.000195983	0.00357904	23	23	12	2	4	4	up
Ibat.Brg_v3.10FG018060	14.2912	3.11414	0.715921	4.34984	1.36237e-05	0.000351328	31	16	24	4	4	2	up
Ibat.Brg_v3.10FG018870	22.7013	-1.59369	0.506398	-3.14711	0.00164893	0.0206757	12	14	6	36	61	23	down
Ibat.Brg_v3.10FG019820	22.122	2.56693	0.642731	3.99379	6.5026e-05	0.00137568	20	62	24	8	14	1	up
Ibat.Brg_v3.10FG021240	31.8569	-2.4999	0.537274	-4.65294	3.27241e-06	9.86866e-05	18	1	8	58	90	40	down
Ibat.Brg_v3.10FG022690	98.8406	-1.76262	0.244964	-7.19543	6.22642e-13	5.14186e-11	52	34	39	163	203	145	down
[truncated: 1,092 more rows]
