# Supplementary material for: Transcriptomic analyses reveal the potential regulators of the storage root skin color in sweet potato
Source: PeerJ. 2025 Dec 1;13:e20231. doi: 10.7717/peerj.20231 (PMC12677044; doi:10.7717/peerj.20231)
Supplement: Supplemental Information 3 [file peerj-13-20231-s003.xlsx]

## Sheet: M1-125T-F_vs_M1-125-F_up
gene	TF family	Arabidopsis homologous
Ibat.Brg_v3.01AG004290	M-type_MADS	AT4G37940.1
Ibat.Brg_v3.01AG029810	ERF	AT5G61890.1
Ibat.Brg_v3.01AG030410	ERF	AT1G78080.1
Ibat.Brg_v3.01BG035980	ERF	AT5G61890.1
Ibat.Brg_v3.01BG036730	ERF	AT1G78080.1
Ibat.Brg_v3.01BG039670	Dof	AT1G51700.1
Ibat.Brg_v3.01CG004930	MYB	AT4G21440.1
Ibat.Brg_v3.01CG005870	ERF	AT5G44210.1
Ibat.Brg_v3.01CG006980	WRKY	AT4G18170.1
Ibat.Brg_v3.01CG029650	ERF	AT1G78080.1
Ibat.Brg_v3.01DG005500	ERF	AT5G44210.1
Ibat.Brg_v3.01DG025500	bHLH	AT5G65640.1
Ibat.Brg_v3.01DG027190	Dof	AT1G51700.1
Ibat.Brg_v3.01EG003110	ERF	AT5G44210.1
Ibat.Brg_v3.01EG024920	C2H2	AT2G41835.1
Ibat.Brg_v3.01EG028630	NAC	AT1G69490.1
Ibat.Brg_v3.01EG033480	ERF	AT5G61890.1
Ibat.Brg_v3.01EG034250	ERF	AT5G61890.1
Ibat.Brg_v3.01EG034550	WRKY	AT5G64810.1
Ibat.Brg_v3.01EG035310	bHLH	AT1G72210.1
Ibat.Brg_v3.01EG035480	ERF	AT1G78080.1
Ibat.Brg_v3.01EG036540	bHLH	AT5G65640.1
Ibat.Brg_v3.01FG005430	ERF	AT5G44210.1
Ibat.Brg_v3.01FG027100	ERF	AT5G61890.1
Ibat.Brg_v3.01FG027430	WRKY	AT5G64810.1
Ibat.Brg_v3.01FG027880	ERF	AT1G78080.1
Ibat.Brg_v3.01FG030850	Dof	AT1G51700.1
Ibat.Brg_v3.02AG020730	WRKY	AT1G80840.1
Ibat.Brg_v3.02BG005010	ERF	AT1G74930.1
Ibat.Brg_v3.02BG010160	C3H	AT1G03790.1
Ibat.Brg_v3.02BG012360	NAC	AT4G27410.2
Ibat.Brg_v3.02BG027290	WRKY	AT1G80840.1
Ibat.Brg_v3.02CG009720	NAC	AT4G27410.2
Ibat.Brg_v3.02CG025830	WRKY	AT1G80840.1
Ibat.Brg_v3.02EG003540	ERF	AT1G19210.1
Ibat.Brg_v3.02EG003550	ERF	AT1G19210.1
Ibat.Brg_v3.02EG006580	HSF	AT5G45710.1
Ibat.Brg_v3.02EG008630	NAC	AT4G27410.2
Ibat.Brg_v3.02EG008640	NAC	AT3G15510.1
Ibat.Brg_v3.02EG023740	WRKY	AT1G80840.1
Ibat.Brg_v3.02FG003520	ERF	AT1G19210.1
Ibat.Brg_v3.02FG003530	ERF	AT1G19210.1
Ibat.Brg_v3.02FG008050	ERF	AT4G28140.1
Ibat.Brg_v3.02FG008330	C3H	AT1G03790.1
Ibat.Brg_v3.02FG009310	HSF	AT5G45710.1
Ibat.Brg_v3.02FG011410	NAC	AT4G27410.2
Ibat.Brg_v3.02FG026120	WRKY	AT1G80840.1
Ibat.Brg_v3.03AG011590	LBD	AT3G02550.1
Ibat.Brg_v3.03AG012590	LBD	AT3G02550.1
Ibat.Brg_v3.03AG019710	NAC	AT1G01720.1
Ibat.Brg_v3.03BG001270	MYB	AT3G28470.1
Ibat.Brg_v3.03CG008840	LBD	AT3G02550.1
Ibat.Brg_v3.03CG009750	bHLH	AT5G65640.1
Ibat.Brg_v3.03DG007030	LBD	AT3G02550.1
Ibat.Brg_v3.03FG010710	LBD	AT3G02550.1
Ibat.Brg_v3.03FG034250	bHLH	AT5G51790.1
Ibat.Brg_v3.04AG024180	ERF	AT3G16770.1
Ibat.Brg_v3.04DG025240	HB-other	AT4G02560.2
Ibat.Brg_v3.04EG030250	ERF	AT3G16770.1
Ibat.Brg_v3.04EG030800	ERF	AT3G16770.1
Ibat.Brg_v3.04FG029240	GATA	AT5G49300.1
Ibat.Brg_v3.05AG001740	WRKY	AT5G13080.1
Ibat.Brg_v3.05AG015860	LBD	AT3G02550.1
Ibat.Brg_v3.05AG019530	bHLH	AT4G37850.1
Ibat.Brg_v3.05BG019280	LBD	AT3G02550.1
Ibat.Brg_v3.05BG022530	bHLH	AT4G37850.1
Ibat.Brg_v3.05BG022540	bHLH	AT4G37850.1
Ibat.Brg_v3.05CG021970	NAC	AT4G27410.2
Ibat.Brg_v3.05CG022240	GRAS	AT5G48150.1
Ibat.Brg_v3.05DG014770	LBD	AT3G02550.1
Ibat.Brg_v3.05DG015790	ZF-HD	AT5G15210.1
Ibat.Brg_v3.05DG018900	bHLH	AT4G37850.1
Ibat.Brg_v3.05EG014470	LBD	AT3G02550.1
Ibat.Brg_v3.05EG021610	NAC	AT4G27410.2
Ibat.Brg_v3.05FG019890	bHLH	AT4G37850.1
Ibat.Brg_v3.05FG019900	bHLH	AT4G37850.1
Ibat.Brg_v3.06AG017690	GRAS	AT5G48150.1
Ibat.Brg_v3.06BG015350	GRAS	AT5G48150.1
Ibat.Brg_v3.06EG015040	GRAS	AT5G48150.1
Ibat.Brg_v3.06FG002690	ERF	AT1G74930.1
Ibat.Brg_v3.06FG009040	WRKY	AT5G26170.1
Ibat.Brg_v3.06FG014880	GRAS	AT5G48150.1
Ibat.Brg_v3.06FG018060	AP2	AT2G28550.1
Ibat.Brg_v3.07BG015240	C2H2	AT2G37430.1
Ibat.Brg_v3.07BG020860	NAC	AT1G69490.1
Ibat.Brg_v3.07DG018090	C2H2	AT2G37430.1
Ibat.Brg_v3.07DG018120	C2H2	AT2G37430.1
Ibat.Brg_v3.07EG020450	C2H2	AT2G37430.1
Ibat.Brg_v3.07FG023370	NAC	AT1G69490.1
Ibat.Brg_v3.08CG008750	MYB	AT5G16770.2
Ibat.Brg_v3.08DG017510	HD-ZIP	AT3G01470.1
Ibat.Brg_v3.08FG001120	HSF	AT4G11660.1
Ibat.Brg_v3.08FG005720	MIKC_MADS	AT3G57230.1
Ibat.Brg_v3.08FG022820	HD-ZIP	AT3G01470.1
Ibat.Brg_v3.08FG022950	HD-ZIP	AT3G01470.1
Ibat.Brg_v3.09AG016310	Trihelix	AT3G10040.1
Ibat.Brg_v3.09BG007740	ERF	AT5G44210.1
Ibat.Brg_v3.09CG013710	Trihelix	AT3G10040.1
Ibat.Brg_v3.09CG017110	bHLH	AT2G42280.1
Ibat.Brg_v3.09DG008220	ERF	AT5G44210.1
Ibat.Brg_v3.09DG016190	Trihelix	AT3G10040.1
Ibat.Brg_v3.09EG006740	ERF	AT5G44210.1
Ibat.Brg_v3.09EG011710	Trihelix	AT3G10040.1
Ibat.Brg_v3.09EG012340	Trihelix	AT3G10040.1
Ibat.Brg_v3.09EG015580	B3	AT5G06250.2
Ibat.Brg_v3.09FG016140	bZIP	AT1G19490.1
Ibat.Brg_v3.09FG016430	Trihelix	AT3G10040.1
Ibat.Brg_v3.09FG019590	bHLH	AT2G42280.1
Ibat.Brg_v3.10AG018640	B3	AT1G01030.1
Ibat.Brg_v3.10AG020460	bZIP	AT5G44080.1
Ibat.Brg_v3.10CG018540	B3	AT1G01030.1
Ibat.Brg_v3.10CG022680	WRKY	AT1G62300.1
Ibat.Brg_v3.10CG023820	bZIP	AT5G44080.1
Ibat.Brg_v3.10EG020410	WRKY	AT1G62300.1
Ibat.Brg_v3.10FG015070	B3	AT2G46870.1
Ibat.Brg_v3.11AG004700	HSF	AT4G18880.1
Ibat.Brg_v3.11BG004110	HSF	AT4G18880.1
Ibat.Brg_v3.11BG006310	MYB_related	AT1G01380.1
Ibat.Brg_v3.11DG004400	MYB_related	AT1G01380.1
Ibat.Brg_v3.12AG019740	ERF	AT1G64380.1
Ibat.Brg_v3.12AG021950	ERF	AT5G11590.1
Ibat.Brg_v3.12AG026800	LBD	AT2G40470.1
Ibat.Brg_v3.12AG027300	bHLH	AT4G25410.1
Ibat.Brg_v3.12AG029790	NAC	AT1G01720.1
Ibat.Brg_v3.12BG024620	ERF	AT5G07580.1
Ibat.Brg_v3.12CG019240	B3	AT2G46870.1
Ibat.Brg_v3.12CG024000	HSF	AT2G26150.1
Ibat.Brg_v3.12CG028380	ERF	AT5G51190.1
Ibat.Brg_v3.12CG028390	ERF	AT5G07580.1
Ibat.Brg_v3.12DG007250	NAC	AT5G07680.1
Ibat.Brg_v3.12DG018020	B3	AT2G46870.1
Ibat.Brg_v3.12DG019100	ARF	AT4G23980.2
Ibat.Brg_v3.12DG024750	ERF	AT5G07580.1
Ibat.Brg_v3.12DG025250	bHLH	AT4G25410.1
Ibat.Brg_v3.12EG015780	B3	AT2G46870.1
Ibat.Brg_v3.12EG026610	NAC	AT1G01720.1
Ibat.Brg_v3.12FG009750	bHLH	AT5G01310.1
Ibat.Brg_v3.12FG016950	MYB	AT5G16770.2
Ibat.Brg_v3.12FG024830	ERF	AT5G51190.1
Ibat.Brg_v3.12FG024840	ERF	AT5G07580.1
Ibat.Brg_v3.12FG025300	bHLH	AT4G25410.1
Ibat.Brg_v3.12FG027390	MYB	AT5G16770.2
Ibat.Brg_v3.12FG027850	NAC	AT1G01720.1
Ibat.Brg_v3.13AG020090	MYB	AT5G49620.1
Ibat.Brg_v3.13AG020210	MYB	AT5G49620.1
Ibat.Brg_v3.13CG020320	MYB	AT5G49620.1
Ibat.Brg_v3.13CG025100	RAV	AT1G68840.2
Ibat.Brg_v3.13DG024990	RAV	AT1G68840.2
Ibat.Brg_v3.13FG019420	RAV	AT1G68840.2
Ibat.Brg_v3.14AG002620	RAV	AT1G68840.2
Ibat.Brg_v3.14BG003060	RAV	AT1G68840.2
Ibat.Brg_v3.14CG000950	CO-like	AT1G25440.1
Ibat.Brg_v3.14CG001960	RAV	AT1G25560.1
Ibat.Brg_v3.14CG019660	MYB	AT3G23250.1
Ibat.Brg_v3.14DG003030	B3	AT1G68840.2
Ibat.Brg_v3.14DG015990	AP2	AT2G28550.3
Ibat.Brg_v3.14EG002890	RAV	AT1G13260.1
Ibat.Brg_v3.14EG014550	E2F/DP	AT5G22220.2
Ibat.Brg_v3.14EG018870	AP2	AT2G28550.3
Ibat.Brg_v3.14FG018460	AP2	AT2G28550.3
Ibat.Brg_v3.14FG021430	MYB	AT3G23250.1
Ibat.Brg_v3.15AG002500	HSF	AT2G41690.1
Ibat.Brg_v3.15AG005500	WRKY	AT2G38470.1
Ibat.Brg_v3.15BG001980	B3	AT2G36080.1
Ibat.Brg_v3.15BG020050	TALE	AT5G25220.2
Ibat.Brg_v3.15BG022740	MYB_related	AT5G47390.1
Ibat.Brg_v3.15CG001500	Trihelix	AT3G10040.1
Ibat.Brg_v3.15CG017940	TALE	AT5G25220.2
Ibat.Brg_v3.15DG001350	Trihelix	AT3G10040.1
Ibat.Brg_v3.15EG023570	MYB_related	AT5G56840.1
Ibat.Brg_v3.15FG001170	Trihelix	AT3G10040.1
Ibat.Brg_v3.S106200	MYB	AT1G69560.1

## Sheet: M1-125T-F_vs_M1-125-F_down
gene	TF family	Arabidopsis homologous
Ibat.Brg_v3.01BG013780	HSF	AT5G03720.1
Ibat.Brg_v3.01CG000760	bZIP	AT1G42990.1
Ibat.Brg_v3.01DG013520	HSF	AT5G03720.1
Ibat.Brg_v3.01EG033110	bZIP	AT1G43700.1
Ibat.Brg_v3.01EG037000	GATA	AT3G21175.2
Ibat.Brg_v3.02EG015770	SBP	AT1G69170.1
Ibat.Brg_v3.03FG002940	MIKC_MADS	AT5G60910.1
Ibat.Brg_v3.03FG003710	G2-like	AT4G37180.2
Ibat.Brg_v3.03FG027690	C3H	AT3G19360.1
Ibat.Brg_v3.04BG006310	NF-YC	AT3G12480.1
Ibat.Brg_v3.04CG011540	bHLH	AT1G05805.1
Ibat.Brg_v3.04DG026270	bHLH	AT4G02590.2
Ibat.Brg_v3.04FG025520	GATA	AT5G49300.1
Ibat.Brg_v3.04FG035150	GRAS	AT2G29060.1
Ibat.Brg_v3.04FG035540	Dof	AT3G55370.1
Ibat.Brg_v3.05BG003990	GRAS	AT2G37650.1
Ibat.Brg_v3.05FG005380	MYB	AT1G09770.1
Ibat.Brg_v3.05FG014130	bZIP	AT5G10030.1
Ibat.Brg_v3.06BG019640	LBD	AT1G65620.3
Ibat.Brg_v3.06CG017880	G2-like	AT1G79430.2
Ibat.Brg_v3.06FG018720	G2-like	AT5G45580.1
Ibat.Brg_v3.09AG000900	Nin-like	AT4G35270.1
Ibat.Brg_v3.09AG006010	TALE	AT1G62360.1
Ibat.Brg_v3.09AG029730	Dof	AT3G55370.1
Ibat.Brg_v3.09AG030100	NAC	AT4G17980.1
Ibat.Brg_v3.09BG002650	LBD	AT3G49940.1
Ibat.Brg_v3.09BG005510	TALE	AT1G62360.1
Ibat.Brg_v3.09BG029170	NAC	AT4G17980.1
Ibat.Brg_v3.09CG004260	TALE	AT1G62360.1
Ibat.Brg_v3.09CG013170	G2-like	AT3G04030.3
Ibat.Brg_v3.09CG029910	NAC	AT4G17980.1
Ibat.Brg_v3.09FG027950	NAC	AT4G17980.1
Ibat.Brg_v3.10BG005390	ARF	AT1G30330.1
Ibat.Brg_v3.10BG006220	HD-ZIP	AT2G34710.1
Ibat.Brg_v3.10CG006050	ARF	AT5G37020.1
Ibat.Brg_v3.10CG017390	ERF	AT4G23750.1
Ibat.Brg_v3.10DG020330	ERF	AT4G23750.1
Ibat.Brg_v3.12AG000350	bHLH	AT5G57150.2
Ibat.Brg_v3.12AG001430	CAMTA	AT5G64220.2
Ibat.Brg_v3.12AG008820	HD-ZIP	AT3G01470.1
Ibat.Brg_v3.12CG001700	NAC	AT5G64220.2
Ibat.Brg_v3.12CG004940	GRAS	AT5G66770.1
Ibat.Brg_v3.12CG005030	C2H2	AT5G66730.1
Ibat.Brg_v3.12CG006940	CO-like	AT3G02380.1
Ibat.Brg_v3.12DG002390	GATA	AT5G66320.2
Ibat.Brg_v3.12DG006340	CO-like	AT3G02380.1
Ibat.Brg_v3.12FG000020	bHLH	AT5G57150.1
Ibat.Brg_v3.12FG001170	MIKC_MADS	AT2G22540.1
Ibat.Brg_v3.12FG004560	GRF	AT4G37740.1
Ibat.Brg_v3.12FG005000	AP2	AT4G36920.1
Ibat.Brg_v3.12FG006170	TCP	AT3G02150.1
Ibat.Brg_v3.13BG021350	SBP	AT1G69170.1
Ibat.Brg_v3.13DG024050	SBP	AT1G69170.1
Ibat.Brg_v3.14AG015810	bHLH	AT2G31280.1
Ibat.Brg_v3.15FG022150	ARR-B	AT2G25180.1
Ibat.Brg_v3.S067950	GRAS	AT2G29060.1
Ibat.Brg_v3.S090380	HSF	AT5G03720.1

## Sheet: M1-125T-S_vs_M1-125-S_up
gene	TF family	Arabidopsis homologous
Ibat.Brg_v3.01AG021190	ERF	AT4G34410.1
Ibat.Brg_v3.01BG005510	MYB	AT4G21440.1
Ibat.Brg_v3.01BG013780	HSF	AT5G03720.1
Ibat.Brg_v3.01BG027860	ERF	AT4G34410.1
Ibat.Brg_v3.01CG029800	bHLH	AT1G72210.1
Ibat.Brg_v3.01DG013520	HSF	AT5G03720.1
Ibat.Brg_v3.01EG035310	bHLH	AT1G72210.1
Ibat.Brg_v3.01FG004420	bHLH	AT1G61660.2
Ibat.Brg_v3.01FG014260	GRAS	AT4G17230.1
Ibat.Brg_v3.01FG028190	bHLH	AT1G72210.1
Ibat.Brg_v3.03CG016510	NAC	AT1G01720.1
Ibat.Brg_v3.03DG023570	MYB	AT3G23250.1
Ibat.Brg_v3.03EG003640	bHLH	AT5G65640.1
Ibat.Brg_v3.03EG020100	bZIP	AT1G58110.1
Ibat.Brg_v3.03EG020400	MYB	AT3G23250.1
Ibat.Brg_v3.04AG026400	NAC	AT4G28530.1
Ibat.Brg_v3.04AG032510	NAC	AT5G22380.1
Ibat.Brg_v3.04BG031240	NAC	AT5G22380.1
Ibat.Brg_v3.04EG034000	NAC	AT4G28530.1
Ibat.Brg_v3.04EG039020	NAC	AT5G22380.1
Ibat.Brg_v3.04FG031600	NAC	AT4G28530.1
Ibat.Brg_v3.05AG019500	bHLH	AT4G37850.1
Ibat.Brg_v3.05CG022240	GRAS	AT5G48150.1
Ibat.Brg_v3.05DG022140	NAC	AT5G08790.1
Ibat.Brg_v3.06FG018310	bHLH	AT5G51790.1
Ibat.Brg_v3.07AG009890	NAC	AT4G28530.1
Ibat.Brg_v3.07AG021060	WRKY	AT2G03340.1
Ibat.Brg_v3.07BG020210	WRKY	AT1G69310.2
Ibat.Brg_v3.07DG022800	WRKY	AT1G69310.2
Ibat.Brg_v3.08DG003690	MIKC_MADS	AT3G57230.1
Ibat.Brg_v3.08FG022820	HD-ZIP	AT3G01470.1
Ibat.Brg_v3.09BG011460	NAC	AT5G18270.1
Ibat.Brg_v3.10DG020040	WRKY	AT4G01250.1
Ibat.Brg_v3.10DG023550	Dof	AT1G51700.1
Ibat.Brg_v3.10FG016980	HSF	AT4G18880.1
Ibat.Brg_v3.10FG017970	Dof	AT1G51700.1
Ibat.Brg_v3.11BG010770	Trihelix	AT3G24490.1
Ibat.Brg_v3.11BG014930	MYB	AT3G47600.1
Ibat.Brg_v3.11FG011530	ARF	AT5G62000.3
Ibat.Brg_v3.12AG020350	WRKY	AT4G01250.1
Ibat.Brg_v3.12AG026800	LBD	AT2G40470.1
Ibat.Brg_v3.12BG019130	WRKY	AT4G01250.1
Ibat.Brg_v3.12CG021940	WRKY	AT4G01250.1
Ibat.Brg_v3.12CG028390	ERF	AT5G07580.1
Ibat.Brg_v3.12DG023710	NF-X1	AT5G05660.1
Ibat.Brg_v3.12DG024750	ERF	AT5G07580.1
Ibat.Brg_v3.12FG018130	WRKY	AT5G52830.1
Ibat.Brg_v3.12FG024310	LBD	AT2G40470.1
Ibat.Brg_v3.12FG026000	MYB_related	AT5G52660.1
Ibat.Brg_v3.12FG027020	NAC	AT5G24590.2
Ibat.Brg_v3.12FG027850	NAC	AT1G01720.1
Ibat.Brg_v3.13AG025310	RAV	AT1G68840.2
Ibat.Brg_v3.13CG020320	MYB	AT5G49620.1
Ibat.Brg_v3.13CG023180	bHLH	AT5G43650.1
Ibat.Brg_v3.13CG025100	RAV	AT1G68840.2
Ibat.Brg_v3.13DG024990	RAV	AT1G68840.2
Ibat.Brg_v3.13EG014050	bHLH	AT5G57150.1
Ibat.Brg_v3.13FG019420	RAV	AT1G68840.2
Ibat.Brg_v3.14BG003060	RAV	AT1G68840.2
Ibat.Brg_v3.14CG000190	HSF	AT1G67970.1
Ibat.Brg_v3.15AG002250	NF-YA	AT5G12840.2
Ibat.Brg_v3.15BG022950	C3H	AT4G29190.1
Ibat.Brg_v3.15EG023840	C3H	AT2G19810.1

## Sheet: M1-125T-S_vs_M1-125-S_down
gene	TF family	Arabidopsis homologous
Ibat.Brg_v3.01AG005950	WRKY	AT1G62300.1
Ibat.Brg_v3.01AG023940	bHLH	AT2G16910.1
Ibat.Brg_v3.01BG030420	bHLH	AT2G16910.1
Ibat.Brg_v3.01CG001630	WRKY	AT3G58710.2
Ibat.Brg_v3.01CG023750	bZIP	AT1G75390.1
Ibat.Brg_v3.01CG025950	Dof	AT5G39660.1
Ibat.Brg_v3.01EG024180	bZIP	AT1G75390.1
Ibat.Brg_v3.01FG020770	bZIP	AT1G75390.1
Ibat.Brg_v3.01FG022060	bHLH	AT2G16910.1
Ibat.Brg_v3.02BG001320	MYB_related	AT5G17300.1
Ibat.Brg_v3.02BG001990	HD-ZIP	AT1G52150.1
Ibat.Brg_v3.02DG015870	MIKC_MADS	AT5G60910.1
Ibat.Brg_v3.02FG008430	G2-like	AT2G20570.1
Ibat.Brg_v3.02FG017980	MIKC_MADS	AT5G60910.1
Ibat.Brg_v3.03AG002640	HSF	AT4G36990.1
Ibat.Brg_v3.03AG004070	HSF	AT4G36990.1
Ibat.Brg_v3.03BG001590	bHLH	AT3G47640.2
Ibat.Brg_v3.03BG004140	HSF	AT4G36990.1
Ibat.Brg_v3.03CG031360	ERF	AT5G61600.1
Ibat.Brg_v3.03DG026250	WRKY	AT3G56400.1
Ibat.Brg_v3.03FG012610	NAC	AT2G17040.1
Ibat.Brg_v3.03FG021320	HD-ZIP	AT2G46680.1
Ibat.Brg_v3.03FG032590	bHLH	AT2G40200.1
Ibat.Brg_v3.04AG010360	bHLH	AT3G07340.1
Ibat.Brg_v3.04AG026220	LBD	AT2G42430.1
Ibat.Brg_v3.04AG030280	MYB	AT3G46130.1
Ibat.Brg_v3.04BG006480	WRKY	AT2G37260.1
Ibat.Brg_v3.04CG005420	NF-YB	AT2G37060.1
Ibat.Brg_v3.04DG028760	ERF	AT4G27950.1
Ibat.Brg_v3.04DG034370	bZIP	AT3G12250.1
Ibat.Brg_v3.04EG009810	TALE	AT2G35940.1
Ibat.Brg_v3.04EG026470	ERF	AT3G16770.1
Ibat.Brg_v3.04FG025100	ERF	AT3G16770.1
Ibat.Brg_v3.04FG025470	ARR-B	AT4G16110.1
Ibat.Brg_v3.04FG026450	MYB	AT4G09460.1
Ibat.Brg_v3.04FG035800	MYB	AT5G59780.3
Ibat.Brg_v3.05AG017730	CO-like	AT3G02380.1
Ibat.Brg_v3.05BG010630	NAC	AT4G29230.1
Ibat.Brg_v3.05CG020960	DBB	AT4G38960.1
Ibat.Brg_v3.05CG021120	bZIP	AT1G75390.1
Ibat.Brg_v3.05CG022370	bHLH	AT5G54680.1
Ibat.Brg_v3.05DG002890	G2-like	AT2G40260.1
Ibat.Brg_v3.05DG015860	Dof	AT5G39660.1
Ibat.Brg_v3.06AG018360	HD-ZIP	AT1G79840.1
Ibat.Brg_v3.06BG015890	HD-ZIP	AT1G79840.1
Ibat.Brg_v3.06EG023690	ERF	AT2G33710.1
Ibat.Brg_v3.06FG015970	bHLH	AT3G21330.1
Ibat.Brg_v3.06FG016030	Dof	AT1G51700.1
Ibat.Brg_v3.06FG022890	MIKC_MADS	AT2G22540.1
Ibat.Brg_v3.07AG005840	MYB	AT1G22640.1
Ibat.Brg_v3.07AG007770	MYB	AT2G47460.1
Ibat.Brg_v3.07DG008500	CO-like	AT5G57660.1
Ibat.Brg_v3.07FG007500	MYB	AT1G22640.1
Ibat.Brg_v3.08AG007010	MIKC_MADS	AT2G22540.1
Ibat.Brg_v3.08AG016120	bHLH	AT1G59640.1
Ibat.Brg_v3.08CG009710	MYB	AT4G22680.1
Ibat.Brg_v3.08DG005560	GRF	AT2G22840.1
Ibat.Brg_v3.08DG009180	ERF	AT4G23750.1
Ibat.Brg_v3.08DG017740	HD-ZIP	AT1G69780.1
Ibat.Brg_v3.08EG003570	bZIP	AT4G35900.1
Ibat.Brg_v3.08EG009880	MYB	AT4G22680.1
Ibat.Brg_v3.09AG000620	bZIP	AT3G56850.1
Ibat.Brg_v3.09BG012510	bZIP	AT3G12250.1
Ibat.Brg_v3.09FG001230	MYB	AT4G38620.1
Ibat.Brg_v3.09FG005890	WRKY	AT4G04450.1
Ibat.Brg_v3.10AG003280	WRKY	AT1G29280.1
Ibat.Brg_v3.10AG015580	bZIP	AT3G62420.1
Ibat.Brg_v3.10AG020280	LSD	AT4G20380.2
Ibat.Brg_v3.10BG005390	ARF	AT1G30330.1
Ibat.Brg_v3.10CG004040	WRKY	AT1G29280.1
Ibat.Brg_v3.10CG016990	TALE	AT5G41410.1
Ibat.Brg_v3.10EG001270	Nin-like	AT1G76350.1
Ibat.Brg_v3.10FG002510	WRKY	AT1G29280.1
Ibat.Brg_v3.10FG010710	bZIP	AT3G62420.1
Ibat.Brg_v3.11FG000120	WRKY	AT4G18170.1
Ibat.Brg_v3.12AG000800	CO-like	AT5G57660.1
Ibat.Brg_v3.12AG004740	MYB	AT1G66370.1
Ibat.Brg_v3.12AG004780	MYB	AT1G66370.1
Ibat.Brg_v3.12BG002180	G2-like	AT5G16560.1
Ibat.Brg_v3.12BG013450	NAC	AT5G18270.1
Ibat.Brg_v3.12BG017910	ARF	AT4G23980.2
Ibat.Brg_v3.12CG000610	CO-like	AT5G57660.1
Ibat.Brg_v3.12CG004940	GRAS	AT5G66770.1
Ibat.Brg_v3.12CG005030	C2H2	AT5G66730.1
Ibat.Brg_v3.12CG027610	G2-like	AT2G38300.1
Ibat.Brg_v3.12DG002340	BBR-BPC	AT5G42520.2
Ibat.Brg_v3.12DG002390	GATA	AT5G66320.2
Ibat.Brg_v3.12DG007380	MYB_related	AT3G47600.1
Ibat.Brg_v3.12EG000840	C2H2	AT1G34370.2
Ibat.Brg_v3.12EG001120	HD-ZIP	AT4G40060.1
Ibat.Brg_v3.12EG001200	HD-ZIP	AT5G65310.2
Ibat.Brg_v3.12FG000020	bHLH	AT5G57150.1
Ibat.Brg_v3.12FG000030	bHLH	AT5G57150.1
Ibat.Brg_v3.12FG001170	MIKC_MADS	AT2G22540.1
Ibat.Brg_v3.13AG018530	G2-like	AT2G01060.1
Ibat.Brg_v3.13BG013920	G2-like	AT2G01060.1
Ibat.Brg_v3.13CG019800	SBP	AT5G50670.1
Ibat.Brg_v3.13DG009840	LSD	AT1G32540.1
Ibat.Brg_v3.13DG017450	ERF	AT1G21910.1
Ibat.Brg_v3.14AG003400	bHLH	AT1G68920.3
Ibat.Brg_v3.14CG020730	bHLH	AT1G63650.1
Ibat.Brg_v3.14DG019970	bHLH	AT4G09820.1
Ibat.Brg_v3.14EG023500	bHLH	AT4G09820.1
