# Supplementary material for: Transcriptomic analyses reveal the potential regulators of the storage root skin color in sweet potato
Source: PeerJ. 2025 Dec 1;13:e20231. doi: 10.7717/peerj.20231 (PMC12677044; doi:10.7717/peerj.20231)
Supplement: Supplemental Information 4 [file peerj-13-20231-s004.xlsx]

## Sheet: M1-125T-S_vs_M1-125-S_down
ID	Description	GeneRatio	BgRatio	pvalue	p.adjust	qvalue	geneID	Count
GO:0009813	flavonoid biosynthetic process	47/1680	437/184965	7.25867e-35	2.1355e-31	1.95602e-31	Ibat.Brg_v3.01AG023670/Ibat.Brg_v3.01AG025410/Ibat.Brg_v3.01AG025720/Ibat.Brg_v3.01BG031720/Ibat.Brg_v3.01FG021850/Ibat.Brg_v3.01FG022930/Ibat.Brg_v3.03AG010230/Ibat.Brg_v3.03BG008980/Ibat.Brg_v3.03CG007400/Ibat.Brg_v3.03DG006070/Ibat.Brg_v3.03DG006100/Ibat.Brg_v3.03FG011930/Ibat.Brg_v3.04AG008790/Ibat.Brg_v3.04BG009960/Ibat.Brg_v3.04CG009010/Ibat.Brg_v3.04DG010370/Ibat.Brg_v3.04EG013880/Ibat.Brg…	47
GO:0016872	intramolecular lyase activity	12/1680	22/184965	1.80327e-19	2.6526e-16	2.42966e-16	Ibat.Brg_v3.05BG004870/Ibat.Brg_v3.05CG003160/Ibat.Brg_v3.05DG005010/Ibat.Brg_v3.05EG003880/Ibat.Brg_v3.12AG001140/Ibat.Brg_v3.12AG026830/Ibat.Brg_v3.12CG001160/Ibat.Brg_v3.12CG028000/Ibat.Brg_v3.12DG000750/Ibat.Brg_v3.12DG023880/Ibat.Brg_v3.12DG024320/Ibat.Brg_v3.12FG024440	12
GO:0046283	anthocyanin-containing compound metabolic process	25/1680	252/184965	2.17188e-18	2.12989e-15	1.95088e-15	Ibat.Brg_v3.03AG008310/Ibat.Brg_v3.03BG006750/Ibat.Brg_v3.03CG005520/Ibat.Brg_v3.03FG006250/Ibat.Brg_v3.05BG031660/Ibat.Brg_v3.05EG010450/Ibat.Brg_v3.11AG005280/Ibat.Brg_v3.11DG003930/Ibat.Brg_v3.12AG000320/Ibat.Brg_v3.12AG003800/Ibat.Brg_v3.12AG003810/Ibat.Brg_v3.12BG004030/Ibat.Brg_v3.12CG004630/Ibat.Brg_v3.12CG004640/Ibat.Brg_v3.12DG002700/Ibat.Brg_v3.12EG003890/Ibat.Brg_v3.12EG003900/Ibat.Brg…	25
GO:0016210	naringenin-chalcone synthase activity	9/1680	15/184965	1.96279e-15	1.44363e-12	1.3223e-12	Ibat.Brg_v3.01AG025410/Ibat.Brg_v3.01AG025720/Ibat.Brg_v3.01BG031720/Ibat.Brg_v3.01FG022930/Ibat.Brg_v3.04AG008790/Ibat.Brg_v3.04BG009960/Ibat.Brg_v3.04CG009010/Ibat.Brg_v3.04DG010370/Ibat.Brg_v3.04EG013880	9
GO:0045552	dihydrokaempferol 4-reductase activity	10/1680	24/184965	6.50264e-15	3.82615e-12	3.50458e-12	Ibat.Brg_v3.12AG003800/Ibat.Brg_v3.12AG003810/Ibat.Brg_v3.12BG004030/Ibat.Brg_v3.12CG004630/Ibat.Brg_v3.12CG004640/Ibat.Brg_v3.12DG002700/Ibat.Brg_v3.12EG003890/Ibat.Brg_v3.12EG003900/Ibat.Brg_v3.12FG002810/Ibat.Brg_v3.12FG002830	10
GO:0045430	chalcone isomerase activity	9/1680	18/184965	1.8606e-14	9.12315e-12	8.35639e-12	Ibat.Brg_v3.05BG004870/Ibat.Brg_v3.05CG003160/Ibat.Brg_v3.05DG005010/Ibat.Brg_v3.05EG003880/Ibat.Brg_v3.12AG026830/Ibat.Brg_v3.12CG028000/Ibat.Brg_v3.12DG023880/Ibat.Brg_v3.12DG024320/Ibat.Brg_v3.12FG024440	9
GO:0009718	anthocyanin-containing compound biosynthetic process	19/1680	204/184965	7.89204e-14	3.31691e-11	3.03814e-11	Ibat.Brg_v3.11AG005280/Ibat.Brg_v3.11DG003930/Ibat.Brg_v3.12AG000320/Ibat.Brg_v3.12AG003800/Ibat.Brg_v3.12AG003810/Ibat.Brg_v3.12BG004030/Ibat.Brg_v3.12CG004630/Ibat.Brg_v3.12CG004640/Ibat.Brg_v3.12DG002700/Ibat.Brg_v3.12EG003890/Ibat.Brg_v3.12EG003900/Ibat.Brg_v3.12FG002810/Ibat.Brg_v3.12FG002830/Ibat.Brg_v3.13CG004670/Ibat.Brg_v3.13DG003650/Ibat.Brg_v3.13EG005800/Ibat.Brg_v3.13FG004600/Ibat.Brg…	19
GO:0042406	extrinsic component of endoplasmic reticulum membrane	10/1680	41/184965	3.23172e-12	1.18847e-09	1.08858e-09	Ibat.Brg_v3.12AG003800/Ibat.Brg_v3.12AG003810/Ibat.Brg_v3.12BG004030/Ibat.Brg_v3.12CG004630/Ibat.Brg_v3.12CG004640/Ibat.Brg_v3.12DG002700/Ibat.Brg_v3.12EG003890/Ibat.Brg_v3.12EG003900/Ibat.Brg_v3.12FG002810/Ibat.Brg_v3.12FG002830	10
GO:0045471	response to ethanol	7/1680	15/184965	3.04162e-11	9.94271e-09	9.10706e-09	Ibat.Brg_v3.03BG031560/Ibat.Brg_v3.04AG030010/Ibat.Brg_v3.04AG030180/Ibat.Brg_v3.04CG031010/Ibat.Brg_v3.04CG031180/Ibat.Brg_v3.04DG031090/Ibat.Brg_v3.04FG035510	7
GO:0004031	aldehyde oxidase activity	6/1680	14/184965	1.5703e-09	2.8874e-07	2.64472e-07	Ibat.Brg_v3.07AG001280/Ibat.Brg_v3.07BG001320/Ibat.Brg_v3.07CG002100/Ibat.Brg_v3.07CG002350/Ibat.Brg_v3.07EG001640/Ibat.Brg_v3.07FG001140	6
GO:0010293	abscisic aldehyde oxidase activity	6/1680	14/184965	1.5703e-09	2.8874e-07	2.64472e-07	Ibat.Brg_v3.07AG001280/Ibat.Brg_v3.07BG001320/Ibat.Brg_v3.07CG002100/Ibat.Brg_v3.07CG002350/Ibat.Brg_v3.07EG001640/Ibat.Brg_v3.07FG001140	6
GO:0016623	oxidoreductase activity, acting on the aldehyde or oxo group of donors, oxygen as acceptor	6/1680	14/184965	1.5703e-09	2.8874e-07	2.64472e-07	Ibat.Brg_v3.07AG001280/Ibat.Brg_v3.07BG001320/Ibat.Brg_v3.07CG002100/Ibat.Brg_v3.07CG002350/Ibat.Brg_v3.07EG001640/Ibat.Brg_v3.07FG001140	6
GO:0018479	benzaldehyde dehydrogenase (NAD+) activity	6/1680	14/184965	1.5703e-09	2.8874e-07	2.64472e-07	Ibat.Brg_v3.07AG001280/Ibat.Brg_v3.07BG001320/Ibat.Brg_v3.07CG002100/Ibat.Brg_v3.07CG002350/Ibat.Brg_v3.07EG001640/Ibat.Brg_v3.07FG001140	6
GO:0018488	aryl-aldehyde oxidase activity	6/1680	14/184965	1.5703e-09	2.8874e-07	2.64472e-07	Ibat.Brg_v3.07AG001280/Ibat.Brg_v3.07BG001320/Ibat.Brg_v3.07CG002100/Ibat.Brg_v3.07CG002350/Ibat.Brg_v3.07EG001640/Ibat.Brg_v3.07FG001140	6
GO:0045486	naringenin 3-dioxygenase activity	6/1680	14/184965	1.5703e-09	2.8874e-07	2.64472e-07	Ibat.Brg_v3.03AG010230/Ibat.Brg_v3.03BG008980/Ibat.Brg_v3.03CG007400/Ibat.Brg_v3.03DG006070/Ibat.Brg_v3.03DG006100/Ibat.Brg_v3.03FG011930	6
GO:0050302	indole-3-acetaldehyde oxidase activity	6/1680	14/184965	1.5703e-09	2.8874e-07	2.64472e-07	Ibat.Brg_v3.07AG001280/Ibat.Brg_v3.07BG001320/Ibat.Brg_v3.07CG002100/Ibat.Brg_v3.07CG002350/Ibat.Brg_v3.07EG001640/Ibat.Brg_v3.07FG001140	6
GO:0031312	extrinsic component of organelle membrane	10/1680	78/184965	2.67649e-09	4.63191e-07	4.24262e-07	Ibat.Brg_v3.12AG003800/Ibat.Brg_v3.12AG003810/Ibat.Brg_v3.12BG004030/Ibat.Brg_v3.12CG004630/Ibat.Brg_v3.12CG004640/Ibat.Brg_v3.12DG002700/Ibat.Brg_v3.12EG003890/Ibat.Brg_v3.12EG003900/Ibat.Brg_v3.12FG002810/Ibat.Brg_v3.12FG002830	10
GO:1900384	regulation of flavonol biosynthetic process	6/1680	18/184965	9.41005e-09	1.53802e-06	1.40876e-06	Ibat.Brg_v3.03AG008310/Ibat.Brg_v3.03BG006750/Ibat.Brg_v3.03CG005520/Ibat.Brg_v3.03FG006250/Ibat.Brg_v3.07AG007770/Ibat.Brg_v3.09FG001230	6
GO:0004029	aldehyde dehydrogenase (NAD+) activity	11/1680	141/184965	8.42419e-08	1.30442e-05	1.19479e-05	Ibat.Brg_v3.04DG035010/Ibat.Brg_v3.04EG040780/Ibat.Brg_v3.04FG039830/Ibat.Brg_v3.06BG012950/Ibat.Brg_v3.07AG001280/Ibat.Brg_v3.07BG001320/Ibat.Brg_v3.07CG002100/Ibat.Brg_v3.07CG002350/Ibat.Brg_v3.07EG001640/Ibat.Brg_v3.07FG001140/Ibat.Brg_v3.12AG003570	11
GO:0046688	response to copper ion	11/1680	153/184965	1.93523e-07	2.84673e-05	2.60747e-05	Ibat.Brg_v3.03BG031560/Ibat.Brg_v3.04AG030010/Ibat.Brg_v3.04AG030180/Ibat.Brg_v3.04CG031010/Ibat.Brg_v3.04CG031180/Ibat.Brg_v3.04DG031090/Ibat.Brg_v3.04FG035510/Ibat.Brg_v3.10AG001050/Ibat.Brg_v3.10BG001000/Ibat.Brg_v3.12FG015220/Ibat.Brg_v3.13FG015860	11
GO:1902265	abscisic acid homeostasis	5/1680	18/184965	4.772e-07	6.68534e-05	6.12347e-05	Ibat.Brg_v3.02AG004310/Ibat.Brg_v3.02CG004490/Ibat.Brg_v3.07AG000610/Ibat.Brg_v3.07EG000830/Ibat.Brg_v3.07FG000410	5
GO:0005372	water transmembrane transporter activity	12/1680	220/184965	1.06288e-06	0.000135957	0.00012453	Ibat.Brg_v3.02CG003410/Ibat.Brg_v3.04BG029880/Ibat.Brg_v3.04EG037640/Ibat.Brg_v3.07AG018110/Ibat.Brg_v3.07BG017220/Ibat.Brg_v3.07CG019010/Ibat.Brg_v3.07CG019290/Ibat.Brg_v3.07DG019710/Ibat.Brg_v3.07FG020320/Ibat.Brg_v3.09CG014080/Ibat.Brg_v3.09EG016090/Ibat.Brg_v3.11FG001060	12
GO:0015250	water channel activity	12/1680	220/184965	1.06288e-06	0.000135957	0.00012453	Ibat.Brg_v3.02CG003410/Ibat.Brg_v3.04BG029880/Ibat.Brg_v3.04EG037640/Ibat.Brg_v3.07AG018110/Ibat.Brg_v3.07BG017220/Ibat.Brg_v3.07CG019010/Ibat.Brg_v3.07CG019290/Ibat.Brg_v3.07DG019710/Ibat.Brg_v3.07FG020320/Ibat.Brg_v3.09CG014080/Ibat.Brg_v3.09EG016090/Ibat.Brg_v3.11FG001060	12
GO:0035250	UDP-galactosyltransferase activity	8/1680	95/184965	2.75306e-06	0.000337479	0.000309116	Ibat.Brg_v3.03AG010960/Ibat.Brg_v3.11CG001580/Ibat.Brg_v3.11EG001440/Ibat.Brg_v3.11FG001230/Ibat.Brg_v3.12AG003690/Ibat.Brg_v3.12CG004540/Ibat.Brg_v3.12DG002550/Ibat.Brg_v3.12FG002690	8
GO:0016620	oxidoreductase activity, acting on the aldehyde or oxo group of donors, NAD or NADP as acceptor	12/1680	243/184965	2.9846e-06	0.000351227	0.000321708	Ibat.Brg_v3.04DG035010/Ibat.Brg_v3.04EG040780/Ibat.Brg_v3.04FG039830/Ibat.Brg_v3.06BG012950/Ibat.Brg_v3.07AG001280/Ibat.Brg_v3.07BG001320/Ibat.Brg_v3.07CG002100/Ibat.Brg_v3.07CG002350/Ibat.Brg_v3.07EG001640/Ibat.Brg_v3.07FG001140/Ibat.Brg_v3.11BG011700/Ibat.Brg_v3.12AG003570	12
GO:0047216	inositol 3-alpha-galactosyltransferase activity	5/1680	27/184965	4.20103e-06	0.000475362	0.00043541	Ibat.Brg_v3.03AG010960/Ibat.Brg_v3.12AG003690/Ibat.Brg_v3.12CG004540/Ibat.Brg_v3.12DG002550/Ibat.Brg_v3.12FG002690	5
GO:0032055	negative regulation of translation in response to stress	4/1680	14/184965	6.31278e-06	0.000640421	0.000586596	Ibat.Brg_v3.01CG023750/Ibat.Brg_v3.01EG024180/Ibat.Brg_v3.01FG020770/Ibat.Brg_v3.05CG021120	4
GO:0043555	regulation of translation in response to stress	4/1680	14/184965	6.31278e-06	0.000640421	0.000586596	Ibat.Brg_v3.01CG023750/Ibat.Brg_v3.01EG024180/Ibat.Brg_v3.01FG020770/Ibat.Brg_v3.05CG021120	4
GO:0080149	sucrose induced translational repression	4/1680	14/184965	6.31278e-06	0.000640421	0.000586596	Ibat.Brg_v3.01CG023750/Ibat.Brg_v3.01EG024180/Ibat.Brg_v3.01FG020770/Ibat.Brg_v3.05CG021120	4
GO:0046685	response to arsenic-containing substance	8/1680	108/184965	7.18652e-06	0.000659683	0.000604239	Ibat.Brg_v3.01CG026500/Ibat.Brg_v3.03BG031560/Ibat.Brg_v3.04AG030010/Ibat.Brg_v3.04AG030180/Ibat.Brg_v3.04CG031010/Ibat.Brg_v3.04CG031180/Ibat.Brg_v3.04DG031090/Ibat.Brg_v3.04FG035510	8
GO:0009687	abscisic acid metabolic process	11/1680	222/184965	7.39957e-06	0.000659683	0.000604239	Ibat.Brg_v3.02AG004310/Ibat.Brg_v3.02BG007110/Ibat.Brg_v3.02CG004490/Ibat.Brg_v3.02EG005170/Ibat.Brg_v3.07AG001280/Ibat.Brg_v3.07BG001320/Ibat.Brg_v3.07CG002100/Ibat.Brg_v3.07CG002350/Ibat.Brg_v3.07EG001640/Ibat.Brg_v3.07EG018530/Ibat.Brg_v3.07FG001140	11
GO:0043288	apocarotenoid metabolic process	11/1680	222/184965	7.39957e-06	0.000659683	0.000604239	Ibat.Brg_v3.02AG004310/Ibat.Brg_v3.02BG007110/Ibat.Brg_v3.02CG004490/Ibat.Brg_v3.02EG005170/Ibat.Brg_v3.07AG001280/Ibat.Brg_v3.07BG001320/Ibat.Brg_v3.07CG002100/Ibat.Brg_v3.07CG002350/Ibat.Brg_v3.07EG001640/Ibat.Brg_v3.07EG018530/Ibat.Brg_v3.07FG001140	11
GO:1902644	tertiary alcohol metabolic process	11/1680	222/184965	7.39957e-06	0.000659683	0.000604239	Ibat.Brg_v3.02AG004310/Ibat.Brg_v3.02BG007110/Ibat.Brg_v3.02CG004490/Ibat.Brg_v3.02EG005170/Ibat.Brg_v3.07AG001280/Ibat.Brg_v3.07BG001320/Ibat.Brg_v3.07CG002100/Ibat.Brg_v3.07CG002350/Ibat.Brg_v3.07EG001640/Ibat.Brg_v3.07EG018530/Ibat.Brg_v3.07FG001140	11
GO:0046028	electron transporter, transferring electrons from cytochrome b6/f complex of photosystem II activity	4/1680	15/184965	8.54613e-06	0.000739491	0.00067734	Ibat.Brg_v3.10AG001050/Ibat.Brg_v3.10AG001860/Ibat.Brg_v3.10BG001000/Ibat.Brg_v3.10CG002560	4
GO:0010287	plastoglobule	13/1680	318/184965	9.12428e-06	0.000766961	0.000702501	Ibat.Brg_v3.02AG004870/Ibat.Brg_v3.07BG004110/Ibat.Brg_v3.08DG002280/Ibat.Brg_v3.10AG000710/Ibat.Brg_v3.10BG000640/Ibat.Brg_v3.10CG005090/Ibat.Brg_v3.10CG019190/Ibat.Brg_v3.10DG005120/Ibat.Brg_v3.10EG004480/Ibat.Brg_v3.10EG004660/Ibat.Brg_v3.10FG021240/Ibat.Brg_v3.15CG009420/Ibat.Brg_v3.15EG010820	13
GO:0010117	photoprotection	6/1680	55/184965	1.10314e-05	0.000901511	0.000825743	Ibat.Brg_v3.05BG031660/Ibat.Brg_v3.05EG010450/Ibat.Brg_v3.07FG020590/Ibat.Brg_v3.13BG019880/Ibat.Brg_v3.13CG022570/Ibat.Brg_v3.13FG016930	6
GO:0071483	cellular response to blue light	9/1680	151/184965	1.14734e-05	0.000912288	0.000835614	Ibat.Brg_v3.02DG003270/Ibat.Brg_v3.05BG031660/Ibat.Brg_v3.05EG010450/Ibat.Brg_v3.12BG008980/Ibat.Brg_v3.12DG009850/Ibat.Brg_v3.12EG009420/Ibat.Brg_v3.13BG019880/Ibat.Brg_v3.13CG022570/Ibat.Brg_v3.13FG016930	9
GO:0016903	oxidoreductase activity, acting on the aldehyde or oxo group of donors	12/1680	279/184965	1.20656e-05	0.000934134	0.000855623	Ibat.Brg_v3.04DG035010/Ibat.Brg_v3.04EG040780/Ibat.Brg_v3.04FG039830/Ibat.Brg_v3.06BG012950/Ibat.Brg_v3.07AG001280/Ibat.Brg_v3.07BG001320/Ibat.Brg_v3.07CG002100/Ibat.Brg_v3.07CG002350/Ibat.Brg_v3.07EG001640/Ibat.Brg_v3.07FG001140/Ibat.Brg_v3.11BG011700/Ibat.Brg_v3.12AG003570	12
GO:0005536	glucose binding	5/1680	34/184965	1.3736e-05	0.00101028	0.000925374	Ibat.Brg_v3.03AG010960/Ibat.Brg_v3.12AG003690/Ibat.Brg_v3.12CG004540/Ibat.Brg_v3.12DG002550/Ibat.Brg_v3.12FG002690	5
GO:0080170	hydrogen peroxide transmembrane transport	5/1680	34/184965	1.3736e-05	0.00101028	0.000925374	Ibat.Brg_v3.02CG003410/Ibat.Brg_v3.07AG018110/Ibat.Brg_v3.07DG019710/Ibat.Brg_v3.09CG014080/Ibat.Brg_v3.09EG016090	5
GO:0009882	blue light photoreceptor activity	5/1680	35/184965	1.59052e-05	0.00114129	0.00104537	Ibat.Brg_v3.05BG031660/Ibat.Brg_v3.05EG010450/Ibat.Brg_v3.12BG008980/Ibat.Brg_v3.12DG009850/Ibat.Brg_v3.12EG009420	5
GO:0017148	negative regulation of translation	14/1680	388/184965	1.69925e-05	0.00119028	0.00109024	Ibat.Brg_v3.01CG023750/Ibat.Brg_v3.01EG024180/Ibat.Brg_v3.01FG020770/Ibat.Brg_v3.04FG038040/Ibat.Brg_v3.05CG021120/Ibat.Brg_v3.06FG022890/Ibat.Brg_v3.08AG007010/Ibat.Brg_v3.10AG001050/Ibat.Brg_v3.10BG001000/Ibat.Brg_v3.11CG012650/Ibat.Brg_v3.12EG006590/Ibat.Brg_v3.12FG001170/Ibat.Brg_v3.12FG006150/Ibat.Brg_v3.14CG019830	14
GO:0034249	negative regulation of cellular amide metabolic process	14/1680	393/184965	1.95606e-05	0.00133831	0.00122583	Ibat.Brg_v3.01CG023750/Ibat.Brg_v3.01EG024180/Ibat.Brg_v3.01FG020770/Ibat.Brg_v3.04FG038040/Ibat.Brg_v3.05CG021120/Ibat.Brg_v3.06FG022890/Ibat.Brg_v3.08AG007010/Ibat.Brg_v3.10AG001050/Ibat.Brg_v3.10BG001000/Ibat.Brg_v3.11CG012650/Ibat.Brg_v3.12EG006590/Ibat.Brg_v3.12FG001170/Ibat.Brg_v3.12FG006150/Ibat.Brg_v3.14CG019830	14
GO:0050660	flavin adenine dinucleotide binding	10/1680	205/184965	2.1792e-05	0.0014571	0.00133463	Ibat.Brg_v3.01DG000680/Ibat.Brg_v3.05BG031660/Ibat.Brg_v3.05EG010450/Ibat.Brg_v3.07AG001280/Ibat.Brg_v3.07BG001320/Ibat.Brg_v3.07CG002100/Ibat.Brg_v3.07CG002350/Ibat.Brg_v3.07EG001640/Ibat.Brg_v3.07FG001140/Ibat.Brg_v3.08CG002020	10
GO:0009688	abscisic acid biosynthetic process	6/1680	65/184965	2.90963e-05	0.00182131	0.00166823	Ibat.Brg_v3.07AG001280/Ibat.Brg_v3.07BG001320/Ibat.Brg_v3.07CG002100/Ibat.Brg_v3.07CG002350/Ibat.Brg_v3.07EG001640/Ibat.Brg_v3.07FG001140	6
GO:0043289	apocarotenoid biosynthetic process	6/1680	65/184965	2.90963e-05	0.00182131	0.00166823	Ibat.Brg_v3.07AG001280/Ibat.Brg_v3.07BG001320/Ibat.Brg_v3.07CG002100/Ibat.Brg_v3.07CG002350/Ibat.Brg_v3.07EG001640/Ibat.Brg_v3.07FG001140	6
GO:1902645	tertiary alcohol biosynthetic process	6/1680	65/184965	2.90963e-05	0.00182131	0.00166823	Ibat.Brg_v3.07AG001280/Ibat.Brg_v3.07BG001320/Ibat.Brg_v3.07CG002100/Ibat.Brg_v3.07CG002350/Ibat.Brg_v3.07EG001640/Ibat.Brg_v3.07FG001140	6
GO:0009881	photoreceptor activity	5/1680	41/184965	3.50963e-05	0.00215111	0.00197032	Ibat.Brg_v3.05BG031660/Ibat.Brg_v3.05EG010450/Ibat.Brg_v3.12BG008980/Ibat.Brg_v3.12DG009850/Ibat.Brg_v3.12EG009420	5
GO:0048029	monosaccharide binding	5/1680	44/184965	4.97269e-05	0.00298565	0.00273472	Ibat.Brg_v3.03AG010960/Ibat.Brg_v3.12AG003690/Ibat.Brg_v3.12CG004540/Ibat.Brg_v3.12DG002550/Ibat.Brg_v3.12FG002690	5
GO:0008466	glycogenin glucosyltransferase activity	6/1680	75/184965	6.56706e-05	0.00386406	0.0035393	Ibat.Brg_v3.01DG026650/Ibat.Brg_v3.03AG010960/Ibat.Brg_v3.12AG003690/Ibat.Brg_v3.12CG004540/Ibat.Brg_v3.12DG002550/Ibat.Brg_v3.12FG002690	6
GO:1900424	regulation of defense response to bacterium	12/1680	337/184965	7.52989e-05	0.00434371	0.00397864	Ibat.Brg_v3.05BG031660/Ibat.Brg_v3.05EG010450/Ibat.Brg_v3.07DG005290/Ibat.Brg_v3.08AG015460/Ibat.Brg_v3.08DG003130/Ibat.Brg_v3.08EG016260/Ibat.Brg_v3.08EG016270/Ibat.Brg_v3.08FG004710/Ibat.Brg_v3.08FG021360/Ibat.Brg_v3.11CG000550/Ibat.Brg_v3.11DG002890/Ibat.Brg_v3.12EG003250	12
GO:0042807	central vacuole	6/1680	78/184965	8.18565e-05	0.00463119	0.00424196	Ibat.Brg_v3.07BG017220/Ibat.Brg_v3.07CG019010/Ibat.Brg_v3.07CG019290/Ibat.Brg_v3.07FG020320/Ibat.Brg_v3.09CG014080/Ibat.Brg_v3.09EG016090	6
GO:0019904	protein domain specific binding	13/1680	403/184965	0.000103621	0.00575194	0.00526851	Ibat.Brg_v3.01EG000620/Ibat.Brg_v3.02AG004870/Ibat.Brg_v3.03EG000510/Ibat.Brg_v3.03EG009420/Ibat.Brg_v3.05BG029650/Ibat.Brg_v3.05DG021200/Ibat.Brg_v3.07BG004110/Ibat.Brg_v3.09CG007880/Ibat.Brg_v3.10AG001050/Ibat.Brg_v3.10BG001000/Ibat.Brg_v3.10CG019190/Ibat.Brg_v3.13CG004660/Ibat.Brg_v3.15BG007100	13
GO:0006021	inositol biosynthetic process	3/1680	11/184965	0.000116871	0.00620204	0.00568078	Ibat.Brg_v3.12AG001140/Ibat.Brg_v3.12CG001160/Ibat.Brg_v3.12DG000750	3
GO:0016532	superoxide dismutase copper chaperone activity	3/1680	11/184965	0.000116871	0.00620204	0.00568078	Ibat.Brg_v3.08AG000900/Ibat.Brg_v3.08BG000740/Ibat.Brg_v3.08DG000440	3
GO:0016706	2-oxoglutarate-dependent dioxygenase activity	11/1680	301/184965	0.000118054	0.00620204	0.00568078	Ibat.Brg_v3.03AG010230/Ibat.Brg_v3.03BG008980/Ibat.Brg_v3.03CG007400/Ibat.Brg_v3.03DG006070/Ibat.Brg_v3.03DG006100/Ibat.Brg_v3.03FG011930/Ibat.Brg_v3.05BG032070/Ibat.Brg_v3.13CG004670/Ibat.Brg_v3.13DG003650/Ibat.Brg_v3.13EG005800/Ibat.Brg_v3.13FG004600	11
GO:0031409	pigment binding	6/1680	84/184965	0.000123701	0.00638469	0.00584808	Ibat.Brg_v3.02AG004870/Ibat.Brg_v3.07BG004110/Ibat.Brg_v3.10CG005090/Ibat.Brg_v3.10EG004480/Ibat.Brg_v3.10FG021240/Ibat.Brg_v3.15EG010820	6
GO:1900425	negative regulation of defense response to bacterium	7/1680	124/184965	0.000150685	0.00764339	0.00700099	Ibat.Brg_v3.07DG005290/Ibat.Brg_v3.08AG015460/Ibat.Brg_v3.08EG016260/Ibat.Brg_v3.08EG016270/Ibat.Brg_v3.08FG021360/Ibat.Brg_v3.11CG000550/Ibat.Brg_v3.12EG003250	7
GO:0009808	lignin metabolic process	13/1680	422/184965	0.000162706	0.00811323	0.00743135	Ibat.Brg_v3.01AG023670/Ibat.Brg_v3.01FG021850/Ibat.Brg_v3.03BG009270/Ibat.Brg_v3.03CG008000/Ibat.Brg_v3.03DG006370/Ibat.Brg_v3.03EG001920/Ibat.Brg_v3.03FG011640/Ibat.Brg_v3.05CG012940/Ibat.Brg_v3.05DG015240/Ibat.Brg_v3.07FG009880/Ibat.Brg_v3.11BG011700/Ibat.Brg_v3.12DG002610/Ibat.Brg_v3.12DG002620	13
GO:0006833	water transport	12/1680	370/184965	0.00017942	0.00858585	0.00786425	Ibat.Brg_v3.02CG003410/Ibat.Brg_v3.04BG029880/Ibat.Brg_v3.04EG037640/Ibat.Brg_v3.07AG018110/Ibat.Brg_v3.07BG017220/Ibat.Brg_v3.07CG019010/Ibat.Brg_v3.07CG019290/Ibat.Brg_v3.07DG019710/Ibat.Brg_v3.07FG020320/Ibat.Brg_v3.09CG014080/Ibat.Brg_v3.09EG016090/Ibat.Brg_v3.11FG001060	12
GO:0042044	fluid transport	12/1680	370/184965	0.00017942	0.00858585	0.00786425	Ibat.Brg_v3.02CG003410/Ibat.Brg_v3.04BG029880/Ibat.Brg_v3.04EG037640/Ibat.Brg_v3.07AG018110/Ibat.Brg_v3.07BG017220/Ibat.Brg_v3.07CG019010/Ibat.Brg_v3.07CG019290/Ibat.Brg_v3.07DG019710/Ibat.Brg_v3.07FG020320/Ibat.Brg_v3.09CG014080/Ibat.Brg_v3.09EG016090/Ibat.Brg_v3.11FG001060	12
GO:0009768	photosynthesis, light harvesting in photosystem I	6/1680	90/184965	0.000180939	0.00858585	0.00786425	Ibat.Brg_v3.02AG004870/Ibat.Brg_v3.07BG004110/Ibat.Brg_v3.10CG005090/Ibat.Brg_v3.10EG004480/Ibat.Brg_v3.10FG021240/Ibat.Brg_v3.15EG010820	6
GO:1902288	regulation of defense response to oomycetes	5/1680	59/184965	0.00020485	0.00956618	0.00876219	Ibat.Brg_v3.07DG005290/Ibat.Brg_v3.08AG015460/Ibat.Brg_v3.08EG016260/Ibat.Brg_v3.08EG016270/Ibat.Brg_v3.08FG021360	5
GO:0002832	negative regulation of response to biotic stimulus	8/1680	177/184965	0.000239994	0.0110322	0.010105	Ibat.Brg_v3.04BG029630/Ibat.Brg_v3.07DG005290/Ibat.Brg_v3.08AG015460/Ibat.Brg_v3.08EG016260/Ibat.Brg_v3.08EG016270/Ibat.Brg_v3.08FG021360/Ibat.Brg_v3.11CG000550/Ibat.Brg_v3.12EG003250	8
GO:0009809	lignin biosynthetic process	11/1680	329/184965	0.000254035	0.0112976	0.0103481	Ibat.Brg_v3.01AG023670/Ibat.Brg_v3.01FG021850/Ibat.Brg_v3.03BG009270/Ibat.Brg_v3.03CG008000/Ibat.Brg_v3.03DG006370/Ibat.Brg_v3.03EG001920/Ibat.Brg_v3.03FG011640/Ibat.Brg_v3.07FG009880/Ibat.Brg_v3.11BG011700/Ibat.Brg_v3.12DG002610/Ibat.Brg_v3.12DG002620	11
GO:0022900	electron transport chain	13/1680	442/184965	0.000254121	0.0112976	0.0103481	Ibat.Brg_v3.03AG003040/Ibat.Brg_v3.03AG006840/Ibat.Brg_v3.03BG002380/Ibat.Brg_v3.05EG015650/Ibat.Brg_v3.10AG001050/Ibat.Brg_v3.10AG001860/Ibat.Brg_v3.10BG001000/Ibat.Brg_v3.10CG002560/Ibat.Brg_v3.11EG008480/Ibat.Brg_v3.12EG005030/Ibat.Brg_v3.12FG007210/Ibat.Brg_v3.13CG004660/Ibat.Brg_v3.15FG007840	13
GO:0005978	glycogen biosynthetic process	6/1680	96/184965	0.000257288	0.0112976	0.0103481	Ibat.Brg_v3.01DG026650/Ibat.Brg_v3.03AG010960/Ibat.Brg_v3.12AG003690/Ibat.Brg_v3.12CG004540/Ibat.Brg_v3.12DG002550/Ibat.Brg_v3.12FG002690	6
GO:0016168	chlorophyll binding	6/1680	98/184965	0.000287692	0.0124469	0.0114008	Ibat.Brg_v3.02AG004870/Ibat.Brg_v3.07BG004110/Ibat.Brg_v3.10CG005090/Ibat.Brg_v3.10EG004480/Ibat.Brg_v3.10FG021240/Ibat.Brg_v3.15EG010820	6
GO:0009646	response to absence of light	12/1680	397/184965	0.000339117	0.0144591	0.0132439	Ibat.Brg_v3.01DG025580/Ibat.Brg_v3.01FG029270/Ibat.Brg_v3.03AG003040/Ibat.Brg_v3.03AG006840/Ibat.Brg_v3.03BG002380/Ibat.Brg_v3.04BG001920/Ibat.Brg_v3.05BG029650/Ibat.Brg_v3.05BG031660/Ibat.Brg_v3.05EG010450/Ibat.Brg_v3.08DG003130/Ibat.Brg_v3.08FG004710/Ibat.Brg_v3.14CG021660	12
GO:0042891	obsolete antibiotic transport	5/1680	67/184965	0.000372222	0.015644	0.0143292	Ibat.Brg_v3.02CG003410/Ibat.Brg_v3.07AG018110/Ibat.Brg_v3.07DG019710/Ibat.Brg_v3.09CG014080/Ibat.Brg_v3.09EG016090	5
GO:0051181	obsolete cofactor transport	7/1680	145/184965	0.000392167	0.0161089	0.014755	Ibat.Brg_v3.02CG003410/Ibat.Brg_v3.07AG018110/Ibat.Brg_v3.07DG019710/Ibat.Brg_v3.09CG014080/Ibat.Brg_v3.09EG016090/Ibat.Brg_v3.11CG001400/Ibat.Brg_v3.11FG001050	7
GO:0009407	toxin catabolic process	8/1680	191/184965	0.000399711	0.0161089	0.014755	Ibat.Brg_v3.01AG020100/Ibat.Brg_v3.01BG026510/Ibat.Brg_v3.01CG021960/Ibat.Brg_v3.01EG020330/Ibat.Brg_v3.03AG008310/Ibat.Brg_v3.03BG006750/Ibat.Brg_v3.03CG005520/Ibat.Brg_v3.03FG006250	8
GO:0043901	obsolete negative regulation of multi-organism process	8/1680	191/184965	0.000399711	0.0161089	0.014755	Ibat.Brg_v3.04BG029630/Ibat.Brg_v3.07DG005290/Ibat.Brg_v3.08AG015460/Ibat.Brg_v3.08EG016260/Ibat.Brg_v3.08EG016270/Ibat.Brg_v3.08FG021360/Ibat.Brg_v3.11CG000550/Ibat.Brg_v3.12EG003250	8
GO:0009903	chloroplast avoidance movement	6/1680	114/184965	0.000644872	0.0245195	0.0224587	Ibat.Brg_v3.07AG000610/Ibat.Brg_v3.07EG000830/Ibat.Brg_v3.07FG000410/Ibat.Brg_v3.12BG008980/Ibat.Brg_v3.12DG009850/Ibat.Brg_v3.12EG009420	6
GO:0010361	regulation of anion channel activity by blue light	3/1680	19/184965	0.000650075	0.0245195	0.0224587	Ibat.Brg_v3.12BG008980/Ibat.Brg_v3.12DG009850/Ibat.Brg_v3.12EG009420	3
GO:0010362	negative regulation of anion channel activity by blue light	3/1680	19/184965	0.000650075	0.0245195	0.0224587	Ibat.Brg_v3.12BG008980/Ibat.Brg_v3.12DG009850/Ibat.Brg_v3.12EG009420	3
GO:0070141	response to UV-A	3/1680	19/184965	0.000650075	0.0245195	0.0224587	Ibat.Brg_v3.13BG019880/Ibat.Brg_v3.13CG022570/Ibat.Brg_v3.13FG016930	3
GO:0071492	cellular response to UV-A	3/1680	19/184965	0.000650075	0.0245195	0.0224587	Ibat.Brg_v3.13BG019880/Ibat.Brg_v3.13CG022570/Ibat.Brg_v3.13FG016930	3
GO:0055088	lipid homeostasis	12/1680	432/184965	0.000712056	0.0265173	0.0242887	Ibat.Brg_v3.02AG004310/Ibat.Brg_v3.02CG004490/Ibat.Brg_v3.03AG003040/Ibat.Brg_v3.03AG006840/Ibat.Brg_v3.03BG002380/Ibat.Brg_v3.07AG000610/Ibat.Brg_v3.07EG000830/Ibat.Brg_v3.07EG018530/Ibat.Brg_v3.07FG000410/Ibat.Brg_v3.09CG010510/Ibat.Brg_v3.11CG014700/Ibat.Brg_v3.12CG004470	12
GO:0016531	copper chaperone activity	3/1680	20/184965	0.000759632	0.0279355	0.0255876	Ibat.Brg_v3.08AG000900/Ibat.Brg_v3.08BG000740/Ibat.Brg_v3.08DG000440	3
GO:0042537	benzene-containing compound metabolic process	9/1680	265/184965	0.000807236	0.0286097	0.0262051	Ibat.Brg_v3.01AG020100/Ibat.Brg_v3.01BG026510/Ibat.Brg_v3.01CG021960/Ibat.Brg_v3.01EG014100/Ibat.Brg_v3.01EG020330/Ibat.Brg_v3.06CG016100/Ibat.Brg_v3.07AG005840/Ibat.Brg_v3.11DG002890/Ibat.Brg_v3.12CG006630	9
GO:0016929	SUMO-specific protease activity	4/1680	46/184965	0.000816863	0.0286097	0.0262051	Ibat.Brg_v3.01AG032810/Ibat.Brg_v3.01DG028720/Ibat.Brg_v3.09EG003110/Ibat.Brg_v3.09FG004050	4
GO:0070137	ubiquitin-like protein-specific endopeptidase activity	4/1680	46/184965	0.000816863	0.0286097	0.0262051	Ibat.Brg_v3.01AG032810/Ibat.Brg_v3.01DG028720/Ibat.Brg_v3.09EG003110/Ibat.Brg_v3.09FG004050	4
GO:0070139	SUMO-specific endopeptidase activity	4/1680	46/184965	0.000816863	0.0286097	0.0262051	Ibat.Brg_v3.01AG032810/Ibat.Brg_v3.01DG028720/Ibat.Brg_v3.09EG003110/Ibat.Brg_v3.09FG004050	4
GO:0016926	protein desumoylation	4/1680	47/184965	0.000886463	0.030682	0.0281033	Ibat.Brg_v3.01AG032810/Ibat.Brg_v3.01DG028720/Ibat.Brg_v3.09EG003110/Ibat.Brg_v3.09FG004050	4
GO:0009055	electron transfer activity	6/1680	122/184965	0.000919463	0.0314542	0.0288106	Ibat.Brg_v3.10AG001050/Ibat.Brg_v3.10AG001860/Ibat.Brg_v3.10BG001000/Ibat.Brg_v3.10CG002560/Ibat.Brg_v3.12EG005030/Ibat.Brg_v3.12FG007210	6
GO:1900150	regulation of defense response to fungus	9/1680	272/184965	0.00096881	0.0323739	0.029653	Ibat.Brg_v3.03CG019940/Ibat.Brg_v3.06BG019980/Ibat.Brg_v3.08AG015460/Ibat.Brg_v3.08DG003130/Ibat.Brg_v3.08EG016260/Ibat.Brg_v3.08EG016270/Ibat.Brg_v3.08FG004710/Ibat.Brg_v3.08FG021360/Ibat.Brg_v3.11DG002890	9
GO:0009902	chloroplast relocation	6/1680	124/184965	0.00100038	0.0323739	0.029653	Ibat.Brg_v3.07AG000610/Ibat.Brg_v3.07EG000830/Ibat.Brg_v3.07FG000410/Ibat.Brg_v3.12BG008980/Ibat.Brg_v3.12DG009850/Ibat.Brg_v3.12EG009420	6
GO:0051667	establishment of plastid localization	6/1680	124/184965	0.00100038	0.0323739	0.029653	Ibat.Brg_v3.07AG000610/Ibat.Brg_v3.07EG000830/Ibat.Brg_v3.07FG000410/Ibat.Brg_v3.12BG008980/Ibat.Brg_v3.12DG009850/Ibat.Brg_v3.12EG009420	6
GO:0010360	negative regulation of anion channel activity	3/1680	22/184965	0.00101237	0.0323739	0.029653	Ibat.Brg_v3.12BG008980/Ibat.Brg_v3.12DG009850/Ibat.Brg_v3.12EG009420	3
GO:1903792	negative regulation of anion transport	3/1680	22/184965	0.00101237	0.0323739	0.029653	Ibat.Brg_v3.12BG008980/Ibat.Brg_v3.12DG009850/Ibat.Brg_v3.12EG009420	3
GO:1903960	negative regulation of anion transmembrane transport	3/1680	22/184965	0.00101237	0.0323739	0.029653	Ibat.Brg_v3.12BG008980/Ibat.Brg_v3.12DG009850/Ibat.Brg_v3.12EG009420	3
GO:0004364	glutathione transferase activity	8/1680	222/184965	0.00106461	0.0336782	0.0308477	Ibat.Brg_v3.01AG020100/Ibat.Brg_v3.01BG026510/Ibat.Brg_v3.01CG021960/Ibat.Brg_v3.01EG020330/Ibat.Brg_v3.03AG008310/Ibat.Brg_v3.03BG006750/Ibat.Brg_v3.03CG005520/Ibat.Brg_v3.03FG006250	8
GO:0030522	intracellular receptor signaling pathway	7/1680	173/184965	0.00111189	0.0347996	0.0318749	Ibat.Brg_v3.02DG003270/Ibat.Brg_v3.05BG031660/Ibat.Brg_v3.05DG014170/Ibat.Brg_v3.05EG010450/Ibat.Brg_v3.12BG008980/Ibat.Brg_v3.12DG009850/Ibat.Brg_v3.12EG009420	7
GO:0009785	blue light signaling pathway	6/1680	130/184965	0.00127622	0.0387075	0.0354543	Ibat.Brg_v3.02DG003270/Ibat.Brg_v3.05BG031660/Ibat.Brg_v3.05EG010450/Ibat.Brg_v3.12BG008980/Ibat.Brg_v3.12DG009850/Ibat.Brg_v3.12EG009420	6
GO:0019750	chloroplast localization	6/1680	130/184965	0.00127622	0.0387075	0.0354543	Ibat.Brg_v3.07AG000610/Ibat.Brg_v3.07EG000830/Ibat.Brg_v3.07FG000410/Ibat.Brg_v3.12BG008980/Ibat.Brg_v3.12DG009850/Ibat.Brg_v3.12EG009420	6
GO:0051644	plastid localization	6/1680	130/184965	0.00127622	0.0387075	0.0354543	Ibat.Brg_v3.07AG000610/Ibat.Brg_v3.07EG000830/Ibat.Brg_v3.07FG000410/Ibat.Brg_v3.12BG008980/Ibat.Brg_v3.12DG009850/Ibat.Brg_v3.12EG009420	6
GO:0009638	phototropism	5/1680	88/184965	0.00129117	0.0387614	0.0355037	Ibat.Brg_v3.05BG031660/Ibat.Brg_v3.05EG010450/Ibat.Brg_v3.12BG008980/Ibat.Brg_v3.12DG009850/Ibat.Brg_v3.12EG009420	5
GO:0046825	regulation of protein export from nucleus	3/1680	24/184965	0.00131267	0.0390089	0.0357304	Ibat.Brg_v3.03EG009420/Ibat.Brg_v3.05DG021200/Ibat.Brg_v3.10EG000590	3
GO:0046165	alcohol biosynthetic process	9/1680	285/184965	0.00133804	0.0393651	0.0360566	Ibat.Brg_v3.07AG001280/Ibat.Brg_v3.07BG001320/Ibat.Brg_v3.07CG002100/Ibat.Brg_v3.07CG002350/Ibat.Brg_v3.07EG001640/Ibat.Brg_v3.07FG001140/Ibat.Brg_v3.12AG001140/Ibat.Brg_v3.12CG001160/Ibat.Brg_v3.12DG000750	9
GO:0032102	negative regulation of response to external stimulus	8/1680	232/184965	0.0014077	0.0408384	0.0374061	Ibat.Brg_v3.04BG029630/Ibat.Brg_v3.07DG005290/Ibat.Brg_v3.08AG015460/Ibat.Brg_v3.08EG016260/Ibat.Brg_v3.08EG016270/Ibat.Brg_v3.08FG021360/Ibat.Brg_v3.11CG000550/Ibat.Brg_v3.12EG003250	8
GO:0046189	phenol-containing compound biosynthetic process	5/1680	90/184965	0.00142713	0.0408384	0.0374061	Ibat.Brg_v3.11DG002890/Ibat.Brg_v3.13CG004670/Ibat.Brg_v3.13DG003650/Ibat.Brg_v3.13EG005800/Ibat.Brg_v3.13FG004600	5
GO:0019684	photosynthesis, light reaction	12/1680	469/184965	0.00142976	0.0408384	0.0374061	Ibat.Brg_v3.02AG004870/Ibat.Brg_v3.04AG024590/Ibat.Brg_v3.07BG004110/Ibat.Brg_v3.09CG007880/Ibat.Brg_v3.10AG001860/Ibat.Brg_v3.10CG002560/Ibat.Brg_v3.10CG005090/Ibat.Brg_v3.10EG004480/Ibat.Brg_v3.10FG021240/Ibat.Brg_v3.12CG002870/Ibat.Brg_v3.13CG004660/Ibat.Brg_v3.15EG010820	12
GO:0008378	galactosyltransferase activity	8/1680	234/184965	0.0014858	0.0418828	0.0383627	Ibat.Brg_v3.03AG010960/Ibat.Brg_v3.11CG001580/Ibat.Brg_v3.11EG001440/Ibat.Brg_v3.11FG001230/Ibat.Brg_v3.12AG003690/Ibat.Brg_v3.12CG004540/Ibat.Brg_v3.12DG002550/Ibat.Brg_v3.12FG002690	8
GO:0070069	cytochrome complex	4/1680	54/184965	0.0014948	0.0418828	0.0383627	Ibat.Brg_v3.05EG015650/Ibat.Brg_v3.10AG001860/Ibat.Brg_v3.10CG002560/Ibat.Brg_v3.12EG005030	4
GO:0018958	phenol-containing compound metabolic process	8/1680	235/184965	0.00152612	0.0422097	0.0386622	Ibat.Brg_v3.01BG004210/Ibat.Brg_v3.06CG016100/Ibat.Brg_v3.11DG002890/Ibat.Brg_v3.12CG006630/Ibat.Brg_v3.13CG004670/Ibat.Brg_v3.13DG003650/Ibat.Brg_v3.13EG005800/Ibat.Brg_v3.13FG004600	8
GO:0009765	photosynthesis, light harvesting	7/1680	183/184965	0.00153516	0.0422097	0.0386622	Ibat.Brg_v3.02AG004870/Ibat.Brg_v3.07BG004110/Ibat.Brg_v3.10CG005090/Ibat.Brg_v3.10EG004480/Ibat.Brg_v3.10FG021240/Ibat.Brg_v3.12CG002870/Ibat.Brg_v3.15EG010820	7
GO:0005782	peroxisomal matrix	5/1680	92/184965	0.00157334	0.0424658	0.0388967	Ibat.Brg_v3.08DG001710/Ibat.Brg_v3.12AG002200/Ibat.Brg_v3.12BG001860/Ibat.Brg_v3.12CG001800/Ibat.Brg_v3.12FG001530	5
GO:0031907	microbody lumen	5/1680	92/184965	0.00157334	0.0424658	0.0388967	Ibat.Brg_v3.08DG001710/Ibat.Brg_v3.12AG002200/Ibat.Brg_v3.12BG001860/Ibat.Brg_v3.12CG001800/Ibat.Brg_v3.12FG001530	5
GO:0018973	trinitrotoluene metabolic process	4/1680	56/184965	0.00171135	0.0427727	0.0391778	Ibat.Brg_v3.01AG020100/Ibat.Brg_v3.01BG026510/Ibat.Brg_v3.01CG021960/Ibat.Brg_v3.01EG020330	4
GO:0018974	2,4,6-trinitrotoluene metabolic process	4/1680	56/184965	0.00171135	0.0427727	0.0391778	Ibat.Brg_v3.01AG020100/Ibat.Brg_v3.01BG026510/Ibat.Brg_v3.01CG021960/Ibat.Brg_v3.01EG020330	4
GO:0019326	nitrotoluene metabolic process	4/1680	56/184965	0.00171135	0.0427727	0.0391778	Ibat.Brg_v3.01AG020100/Ibat.Brg_v3.01BG026510/Ibat.Brg_v3.01CG021960/Ibat.Brg_v3.01EG020330	4
GO:0046256	2,4,6-trinitrotoluene catabolic process	4/1680	56/184965	0.00171135	0.0427727	0.0391778	Ibat.Brg_v3.01AG020100/Ibat.Brg_v3.01BG026510/Ibat.Brg_v3.01CG021960/Ibat.Brg_v3.01EG020330	4
GO:0046260	trinitrotoluene catabolic process	4/1680	56/184965	0.00171135	0.0427727	0.0391778	Ibat.Brg_v3.01AG020100/Ibat.Brg_v3.01BG026510/Ibat.Brg_v3.01CG021960/Ibat.Brg_v3.01EG020330	4
GO:0046263	nitrotoluene catabolic process	4/1680	56/184965	0.00171135	0.0427727	0.0391778	Ibat.Brg_v3.01AG020100/Ibat.Brg_v3.01BG026510/Ibat.Brg_v3.01CG021960/Ibat.Brg_v3.01EG020330	4
GO:0072490	toluene-containing compound metabolic process	4/1680	56/184965	0.00171135	0.0427727	0.0391778	Ibat.Brg_v3.01AG020100/Ibat.Brg_v3.01BG026510/Ibat.Brg_v3.01CG021960/Ibat.Brg_v3.01EG020330	4
GO:0072491	toluene-containing compound catabolic process	4/1680	56/184965	0.00171135	0.0427727	0.0391778	Ibat.Brg_v3.01AG020100/Ibat.Brg_v3.01BG026510/Ibat.Brg_v3.01CG021960/Ibat.Brg_v3.01EG020330	4
GO:0010162	seed dormancy process	6/1680	138/184965	0.0017301	0.0427727	0.0391778	Ibat.Brg_v3.01DG026260/Ibat.Brg_v3.01EG037800/Ibat.Brg_v3.02AG010360/Ibat.Brg_v3.02BG012280/Ibat.Brg_v3.02DG010650/Ibat.Brg_v3.07EG018530	6
GO:0022611	dormancy process	6/1680	138/184965	0.0017301	0.0427727	0.0391778	Ibat.Brg_v3.01DG026260/Ibat.Brg_v3.01EG037800/Ibat.Brg_v3.02AG010360/Ibat.Brg_v3.02BG012280/Ibat.Brg_v3.02DG010650/Ibat.Brg_v3.07EG018530	6
GO:0055070	copper ion homeostasis	5/1680	95/184965	0.00181289	0.0437527	0.0400754	Ibat.Brg_v3.08AG000900/Ibat.Brg_v3.08BG000740/Ibat.Brg_v3.08DG000440/Ibat.Brg_v3.10AG001050/Ibat.Brg_v3.10BG001000	5
GO:0004356	glutamate-ammonia ligase activity	3/1680	27/184965	0.00185897	0.0437527	0.0400754	Ibat.Brg_v3.01AG015650/Ibat.Brg_v3.01BG015760/Ibat.Brg_v3.01DG015390	3
GO:0016211	ammonia ligase activity	3/1680	27/184965	0.00185897	0.0437527	0.0400754	Ibat.Brg_v3.01AG015650/Ibat.Brg_v3.01BG015760/Ibat.Brg_v3.01DG015390	3
GO:0016880	acid-ammonia (or amide) ligase activity	3/1680	27/184965	0.00185897	0.0437527	0.0400754	Ibat.Brg_v3.01AG015650/Ibat.Brg_v3.01BG015760/Ibat.Brg_v3.01DG015390	3
GO:0031022	nuclear migration along microfilament	3/1680	27/184965	0.00185897	0.0437527	0.0400754	Ibat.Brg_v3.07AG000610/Ibat.Brg_v3.07EG000830/Ibat.Brg_v3.07FG000410	3
GO:0099515	actin filament-based transport	3/1680	27/184965	0.00185897	0.0437527	0.0400754	Ibat.Brg_v3.07AG000610/Ibat.Brg_v3.07EG000830/Ibat.Brg_v3.07FG000410	3
GO:0006012	galactose metabolic process	5/1680	98/184965	0.00207809	0.0485217	0.0444437	Ibat.Brg_v3.03AG010960/Ibat.Brg_v3.12AG003690/Ibat.Brg_v3.12CG004540/Ibat.Brg_v3.12DG002550/Ibat.Brg_v3.12FG002690	5

## Sheet: M1-125T-S_vs_M1-125-S_up
ID	Description	GeneRatio	BgRatio	pvalue	p.adjust	qvalue	geneID	Count
GO:0031407	oxylipin metabolic process	10/1218	36/184965	3.21767e-14	8.10211e-11	7.48533e-11	Ibat.Brg_v3.03AG028660/Ibat.Brg_v3.03CG025040/Ibat.Brg_v3.03DG018780/Ibat.Brg_v3.03FG026660/Ibat.Brg_v3.05EG001120/Ibat.Brg_v3.06AG023820/Ibat.Brg_v3.06BG022340/Ibat.Brg_v3.06CG025170/Ibat.Brg_v3.06EG020170/Ibat.Brg_v3.06FG020990	10
GO:0019373	epoxygenase P450 pathway	8/1218	46/184965	7.22647e-10	9.09813e-07	8.40553e-07	Ibat.Brg_v3.06AG023820/Ibat.Brg_v3.06BG022340/Ibat.Brg_v3.06CG025170/Ibat.Brg_v3.06EG020170/Ibat.Brg_v3.06FG020990/Ibat.Brg_v3.10DG015930/Ibat.Brg_v3.10EG014860/Ibat.Brg_v3.10FG009720	8
GO:0080037	negative regulation of cytokinin-activated signaling pathway	6/1218	23/184965	7.38876e-09	2.29433e-06	2.11967e-06	Ibat.Brg_v3.02BG029740/Ibat.Brg_v3.02BG030470/Ibat.Brg_v3.02BG030620/Ibat.Brg_v3.02CG028650/Ibat.Brg_v3.02EG026270/Ibat.Brg_v3.02FG028860	6
GO:0034002	(R)-limonene synthase activity	9/1218	88/184965	8.11237e-09	2.29433e-06	2.11967e-06	Ibat.Brg_v3.07AG001450/Ibat.Brg_v3.07BG001500/Ibat.Brg_v3.07DG000910/Ibat.Brg_v3.07DG000930/Ibat.Brg_v3.07EG001840/Ibat.Brg_v3.07EG001860/Ibat.Brg_v3.07FG001340/Ibat.Brg_v3.07FG012430/Ibat.Brg_v3.07FG012440	9
GO:0050550	pinene synthase activity	9/1218	88/184965	8.11237e-09	2.29433e-06	2.11967e-06	Ibat.Brg_v3.07AG001450/Ibat.Brg_v3.07BG001500/Ibat.Brg_v3.07DG000910/Ibat.Brg_v3.07DG000930/Ibat.Brg_v3.07EG001840/Ibat.Brg_v3.07EG001860/Ibat.Brg_v3.07FG001340/Ibat.Brg_v3.07FG012430/Ibat.Brg_v3.07FG012440	9
GO:0050552	(4S)-limonene synthase activity	9/1218	88/184965	8.11237e-09	2.29433e-06	2.11967e-06	Ibat.Brg_v3.07AG001450/Ibat.Brg_v3.07BG001500/Ibat.Brg_v3.07DG000910/Ibat.Brg_v3.07DG000930/Ibat.Brg_v3.07EG001840/Ibat.Brg_v3.07EG001860/Ibat.Brg_v3.07FG001340/Ibat.Brg_v3.07FG012430/Ibat.Brg_v3.07FG012440	9
GO:0052578	alpha-farnesene synthase activity	9/1218	88/184965	8.11237e-09	2.29433e-06	2.11967e-06	Ibat.Brg_v3.07AG001450/Ibat.Brg_v3.07BG001500/Ibat.Brg_v3.07DG000910/Ibat.Brg_v3.07DG000930/Ibat.Brg_v3.07EG001840/Ibat.Brg_v3.07EG001860/Ibat.Brg_v3.07FG001340/Ibat.Brg_v3.07FG012430/Ibat.Brg_v3.07FG012440	9
GO:0080015	sabinene synthase activity	9/1218	88/184965	8.11237e-09	2.29433e-06	2.11967e-06	Ibat.Brg_v3.07AG001450/Ibat.Brg_v3.07BG001500/Ibat.Brg_v3.07DG000910/Ibat.Brg_v3.07DG000930/Ibat.Brg_v3.07EG001840/Ibat.Brg_v3.07EG001860/Ibat.Brg_v3.07FG001340/Ibat.Brg_v3.07FG012430/Ibat.Brg_v3.07FG012440	9
GO:0016098	monoterpenoid metabolic process	9/1218	91/184965	1.0934e-08	2.29433e-06	2.11967e-06	Ibat.Brg_v3.07AG001450/Ibat.Brg_v3.07BG001500/Ibat.Brg_v3.07DG000910/Ibat.Brg_v3.07DG000930/Ibat.Brg_v3.07EG001840/Ibat.Brg_v3.07EG001860/Ibat.Brg_v3.07FG001340/Ibat.Brg_v3.07FG012430/Ibat.Brg_v3.07FG012440	9
GO:0016099	monoterpenoid biosynthetic process	9/1218	91/184965	1.0934e-08	2.29433e-06	2.11967e-06	Ibat.Brg_v3.07AG001450/Ibat.Brg_v3.07BG001500/Ibat.Brg_v3.07DG000910/Ibat.Brg_v3.07DG000930/Ibat.Brg_v3.07EG001840/Ibat.Brg_v3.07EG001860/Ibat.Brg_v3.07FG001340/Ibat.Brg_v3.07FG012430/Ibat.Brg_v3.07FG012440	9
GO:0034768	(E)-beta-ocimene synthase activity	9/1218	91/184965	1.0934e-08	2.29433e-06	2.11967e-06	Ibat.Brg_v3.07AG001450/Ibat.Brg_v3.07BG001500/Ibat.Brg_v3.07DG000910/Ibat.Brg_v3.07DG000930/Ibat.Brg_v3.07EG001840/Ibat.Brg_v3.07EG001860/Ibat.Brg_v3.07FG001340/Ibat.Brg_v3.07FG012430/Ibat.Brg_v3.07FG012440	9
GO:0050551	myrcene synthase activity	9/1218	91/184965	1.0934e-08	2.29433e-06	2.11967e-06	Ibat.Brg_v3.07AG001450/Ibat.Brg_v3.07BG001500/Ibat.Brg_v3.07DG000910/Ibat.Brg_v3.07DG000930/Ibat.Brg_v3.07EG001840/Ibat.Brg_v3.07EG001860/Ibat.Brg_v3.07FG001340/Ibat.Brg_v3.07FG012430/Ibat.Brg_v3.07FG012440	9
GO:0009978	allene oxide synthase activity	5/1218	13/184965	1.51283e-08	2.72094e-06	2.5138e-06	Ibat.Brg_v3.06AG023820/Ibat.Brg_v3.06BG022340/Ibat.Brg_v3.06CG025170/Ibat.Brg_v3.06EG020170/Ibat.Brg_v3.06FG020990	5
GO:0019825	oxygen binding	5/1218	13/184965	1.51283e-08	2.72094e-06	2.5138e-06	Ibat.Brg_v3.06AG023820/Ibat.Brg_v3.06BG022340/Ibat.Brg_v3.06CG025170/Ibat.Brg_v3.06EG020170/Ibat.Brg_v3.06FG020990	5
GO:0009695	jasmonic acid biosynthetic process	12/1218	224/184965	4.34279e-08	7.29009e-06	6.73513e-06	Ibat.Brg_v3.03AG028660/Ibat.Brg_v3.03CG025040/Ibat.Brg_v3.03DG018780/Ibat.Brg_v3.03FG026660/Ibat.Brg_v3.06AG023820/Ibat.Brg_v3.06BG022340/Ibat.Brg_v3.06CG025170/Ibat.Brg_v3.06EG020170/Ibat.Brg_v3.06FG020990/Ibat.Brg_v3.12BG019800/Ibat.Brg_v3.12BG019940/Ibat.Brg_v3.12BG020040	12
GO:0043692	monoterpene metabolic process	11/1218	200/184965	1.20927e-07	1.75961e-05	1.62566e-05	Ibat.Brg_v3.07AG001450/Ibat.Brg_v3.07BG001500/Ibat.Brg_v3.07DG000910/Ibat.Brg_v3.07DG000930/Ibat.Brg_v3.07EG001840/Ibat.Brg_v3.07EG001860/Ibat.Brg_v3.07FG001340/Ibat.Brg_v3.07FG012430/Ibat.Brg_v3.07FG012440/Ibat.Brg_v3.09EG005410/Ibat.Brg_v3.09EG005430	11
GO:0043693	monoterpene biosynthetic process	11/1218	200/184965	1.20927e-07	1.75961e-05	1.62566e-05	Ibat.Brg_v3.07AG001450/Ibat.Brg_v3.07BG001500/Ibat.Brg_v3.07DG000910/Ibat.Brg_v3.07DG000930/Ibat.Brg_v3.07EG001840/Ibat.Brg_v3.07EG001860/Ibat.Brg_v3.07FG001340/Ibat.Brg_v3.07FG012430/Ibat.Brg_v3.07FG012440/Ibat.Brg_v3.09EG005410/Ibat.Brg_v3.09EG005430	11
GO:0009694	jasmonic acid metabolic process	12/1218	247/184965	1.25786e-07	1.75961e-05	1.62566e-05	Ibat.Brg_v3.03AG028660/Ibat.Brg_v3.03CG025040/Ibat.Brg_v3.03DG018780/Ibat.Brg_v3.03FG026660/Ibat.Brg_v3.06AG023820/Ibat.Brg_v3.06BG022340/Ibat.Brg_v3.06CG025170/Ibat.Brg_v3.06EG020170/Ibat.Brg_v3.06FG020990/Ibat.Brg_v3.12BG019800/Ibat.Brg_v3.12BG019940/Ibat.Brg_v3.12BG020040	12
GO:0120091	jasmonic acid hydrolase	6/1218	37/184965	1.57292e-07	2.08453e-05	1.92585e-05	Ibat.Brg_v3.09AG010910/Ibat.Brg_v3.09CG008940/Ibat.Brg_v3.09FG010760/Ibat.Brg_v3.12AG026280/Ibat.Brg_v3.12CG027450/Ibat.Brg_v3.12DG023760	6
GO:0019369	arachidonic acid metabolic process	8/1218	97/184965	2.97664e-07	3.74759e-05	3.4623e-05	Ibat.Brg_v3.06AG023820/Ibat.Brg_v3.06BG022340/Ibat.Brg_v3.06CG025170/Ibat.Brg_v3.06EG020170/Ibat.Brg_v3.06FG020990/Ibat.Brg_v3.10DG015930/Ibat.Brg_v3.10EG014860/Ibat.Brg_v3.10FG009720	8
GO:0031408	oxylipin biosynthetic process	5/1218	23/184965	3.74482e-07	4.49021e-05	4.14839e-05	Ibat.Brg_v3.03AG028660/Ibat.Brg_v3.03CG025040/Ibat.Brg_v3.03DG018780/Ibat.Brg_v3.03FG026660/Ibat.Brg_v3.05EG001120	5
GO:0006690	icosanoid metabolic process	8/1218	119/184965	1.42209e-06	0.000162764	0.000150374	Ibat.Brg_v3.06AG023820/Ibat.Brg_v3.06BG022340/Ibat.Brg_v3.06CG025170/Ibat.Brg_v3.06EG020170/Ibat.Brg_v3.06FG020990/Ibat.Brg_v3.10DG015930/Ibat.Brg_v3.10EG014860/Ibat.Brg_v3.10FG009720	8
GO:0009068	aspartate family amino acid catabolic process	4/1218	14/184965	1.77703e-06	0.000194547	0.000179737	Ibat.Brg_v3.12BG017390/Ibat.Brg_v3.12CG019960/Ibat.Brg_v3.12DG018610/Ibat.Brg_v3.12EG016540	4
GO:0004123	cystathionine gamma-lyase activity	4/1218	15/184965	2.41053e-06	0.000224804	0.000207691	Ibat.Brg_v3.12BG017390/Ibat.Brg_v3.12CG019960/Ibat.Brg_v3.12DG018610/Ibat.Brg_v3.12EG016540	4
GO:0019343	cysteine biosynthetic process via cystathionine	4/1218	15/184965	2.41053e-06	0.000224804	0.000207691	Ibat.Brg_v3.12BG017390/Ibat.Brg_v3.12CG019960/Ibat.Brg_v3.12DG018610/Ibat.Brg_v3.12EG016540	4
GO:0019346	transsulfuration	4/1218	15/184965	2.41053e-06	0.000224804	0.000207691	Ibat.Brg_v3.12BG017390/Ibat.Brg_v3.12CG019960/Ibat.Brg_v3.12DG018610/Ibat.Brg_v3.12EG016540	4
GO:0071266	'de novo' L-methionine biosynthetic process	4/1218	15/184965	2.41053e-06	0.000224804	0.000207691	Ibat.Brg_v3.12BG017390/Ibat.Brg_v3.12CG019960/Ibat.Brg_v3.12DG018610/Ibat.Brg_v3.12EG016540	4
GO:0051289	protein homotetramerization	9/1218	195/184965	7.06921e-06	0.000635724	0.000587329	Ibat.Brg_v3.01AG002250/Ibat.Brg_v3.01CG001370/Ibat.Brg_v3.12BG017390/Ibat.Brg_v3.12CG019960/Ibat.Brg_v3.12DG018610/Ibat.Brg_v3.12EG016540/Ibat.Brg_v3.12EG022240/Ibat.Brg_v3.12FG023640/Ibat.Brg_v3.14CG006190	9
GO:0003962	cystathionine gamma-synthase activity	4/1218	20/184965	8.3344e-06	0.000723656	0.000668567	Ibat.Brg_v3.12BG017390/Ibat.Brg_v3.12CG019960/Ibat.Brg_v3.12DG018610/Ibat.Brg_v3.12EG016540	4
GO:0046622	positive regulation of organ growth	4/1218	26/184965	2.49206e-05	0.00209167	0.00193244	Ibat.Brg_v3.01EG031640/Ibat.Brg_v3.01FG025190/Ibat.Brg_v3.09DG031910/Ibat.Brg_v3.09FG029960	4
GO:0001676	long-chain fatty acid metabolic process	9/1218	231/184965	2.71207e-05	0.0022029	0.0020352	Ibat.Brg_v3.06AG023820/Ibat.Brg_v3.06BG022340/Ibat.Brg_v3.06CG025170/Ibat.Brg_v3.06EG020170/Ibat.Brg_v3.06FG020990/Ibat.Brg_v3.08EG009370/Ibat.Brg_v3.10DG015930/Ibat.Brg_v3.10EG014860/Ibat.Brg_v3.10FG009720	9
GO:0046246	terpene biosynthetic process	13/1218	493/184965	3.1707e-05	0.00249494	0.00230501	Ibat.Brg_v3.07AG001450/Ibat.Brg_v3.07BG001500/Ibat.Brg_v3.07DG000910/Ibat.Brg_v3.07DG000930/Ibat.Brg_v3.07EG001840/Ibat.Brg_v3.07EG001860/Ibat.Brg_v3.07FG001340/Ibat.Brg_v3.07FG012430/Ibat.Brg_v3.07FG012440/Ibat.Brg_v3.09EG005410/Ibat.Brg_v3.09EG005430/Ibat.Brg_v3.15BG009230/Ibat.Brg_v3.15DG009830	13
GO:0080027	response to herbivore	9/1218	241/184965	3.77187e-05	0.00287805	0.00265896	Ibat.Brg_v3.07AG001450/Ibat.Brg_v3.07BG001500/Ibat.Brg_v3.07DG000910/Ibat.Brg_v3.07DG000930/Ibat.Brg_v3.07EG001840/Ibat.Brg_v3.07EG001860/Ibat.Brg_v3.07FG001340/Ibat.Brg_v3.07FG012430/Ibat.Brg_v3.07FG012440	9
GO:0009825	multidimensional cell growth	12/1218	438/184965	4.38583e-05	0.0032481	0.00300083	Ibat.Brg_v3.01BG035930/Ibat.Brg_v3.01EG031640/Ibat.Brg_v3.01EG033410/Ibat.Brg_v3.01EG034310/Ibat.Brg_v3.01FG025190/Ibat.Brg_v3.01FG026970/Ibat.Brg_v3.02FG001680/Ibat.Brg_v3.08DG016180/Ibat.Brg_v3.09DG031910/Ibat.Brg_v3.09FG029960/Ibat.Brg_v3.12FG010540/Ibat.Brg_v3.12FG028250	12
GO:0051262	protein tetramerization	11/1218	376/184965	5.04064e-05	0.00362638	0.00335032	Ibat.Brg_v3.01AG002250/Ibat.Brg_v3.01CG001370/Ibat.Brg_v3.11BG008880/Ibat.Brg_v3.12BG017390/Ibat.Brg_v3.12BG023410/Ibat.Brg_v3.12CG019960/Ibat.Brg_v3.12DG018610/Ibat.Brg_v3.12EG016540/Ibat.Brg_v3.12EG022240/Ibat.Brg_v3.12FG023640/Ibat.Brg_v3.14CG006190	11
GO:0043455	regulation of secondary metabolic process	9/1218	253/184965	5.48707e-05	0.00377054	0.00348351	Ibat.Brg_v3.02BG029740/Ibat.Brg_v3.02BG030470/Ibat.Brg_v3.02BG030620/Ibat.Brg_v3.02CG028650/Ibat.Brg_v3.02EG026270/Ibat.Brg_v3.02FG025100/Ibat.Brg_v3.02FG028860/Ibat.Brg_v3.03EG003640/Ibat.Brg_v3.11BG014930	9
GO:0080036	regulation of cytokinin-activated signaling pathway	7/1218	145/184965	5.54051e-05	0.00377054	0.00348351	Ibat.Brg_v3.02BG029740/Ibat.Brg_v3.02BG030470/Ibat.Brg_v3.02BG030620/Ibat.Brg_v3.02CG028650/Ibat.Brg_v3.02EG026270/Ibat.Brg_v3.02FG028860/Ibat.Brg_v3.15CG004420	7
GO:2000022	regulation of jasmonic acid mediated signaling pathway	9/1218	259/184965	6.56566e-05	0.00435061	0.00401942	Ibat.Brg_v3.08BG010980/Ibat.Brg_v3.09AG010910/Ibat.Brg_v3.09CG008940/Ibat.Brg_v3.09FG010760/Ibat.Brg_v3.11AG008130/Ibat.Brg_v3.11EG008670/Ibat.Brg_v3.12AG026280/Ibat.Brg_v3.12CG027450/Ibat.Brg_v3.12DG023760	9
GO:0010330	cellulose synthase complex	5/1218	66/184965	7.86922e-05	0.00503851	0.00465495	Ibat.Brg_v3.01BG035930/Ibat.Brg_v3.01EG033410/Ibat.Brg_v3.01EG034310/Ibat.Brg_v3.01FG026970/Ibat.Brg_v3.12FG028250	5
GO:0009809	lignin biosynthetic process	10/1218	329/184965	8.00398e-05	0.00503851	0.00465495	Ibat.Brg_v3.03AG005250/Ibat.Brg_v3.03BG005370/Ibat.Brg_v3.03BG005420/Ibat.Brg_v3.03BG005430/Ibat.Brg_v3.03FG004420/Ibat.Brg_v3.03FG004460/Ibat.Brg_v3.03FG004470/Ibat.Brg_v3.03FG005440/Ibat.Brg_v3.03FG005470/Ibat.Brg_v3.05CG020980	10
GO:0071265	L-methionine biosynthetic process	4/1218	35/184965	8.32639e-05	0.00511362	0.00472434	Ibat.Brg_v3.12BG017390/Ibat.Brg_v3.12CG019960/Ibat.Brg_v3.12DG018610/Ibat.Brg_v3.12EG016540	4
GO:0016682	oxidoreductase activity, acting on diphenols and related substances as donors, oxygen as acceptor	6/1218	109/184965	9.16243e-05	0.00545664	0.00504125	Ibat.Brg_v3.10AG003890/Ibat.Brg_v3.10BG004060/Ibat.Brg_v3.10CG004660/Ibat.Brg_v3.10DG004520/Ibat.Brg_v3.10EG004100/Ibat.Brg_v3.10FG003050	6
GO:0000098	sulfur amino acid catabolic process	4/1218	36/184965	9.31833e-05	0.00545664	0.00504125	Ibat.Brg_v3.12BG017390/Ibat.Brg_v3.12CG019960/Ibat.Brg_v3.12DG018610/Ibat.Brg_v3.12EG016540	4
GO:0009092	homoserine metabolic process	4/1218	38/184965	0.000115555	0.00646597	0.00597375	Ibat.Brg_v3.12BG017390/Ibat.Brg_v3.12CG019960/Ibat.Brg_v3.12DG018610/Ibat.Brg_v3.12EG016540	4
GO:0010966	regulation of phosphate transport	4/1218	38/184965	0.000115555	0.00646597	0.00597375	Ibat.Brg_v3.10BG022220/Ibat.Brg_v3.10CG021590/Ibat.Brg_v3.10DG023640/Ibat.Brg_v3.10FG018060	4
GO:0016629	12-oxophytodienoate reductase activity	4/1218	40/184965	0.000141582	0.00759594	0.0070177	Ibat.Brg_v3.03AG028660/Ibat.Brg_v3.03CG025040/Ibat.Brg_v3.03DG018780/Ibat.Brg_v3.03FG026660	4
GO:0051761	sesquiterpene metabolic process	11/1218	425/184965	0.000147806	0.00759594	0.0070177	Ibat.Brg_v3.07AG001450/Ibat.Brg_v3.07BG001500/Ibat.Brg_v3.07DG000910/Ibat.Brg_v3.07DG000930/Ibat.Brg_v3.07EG001840/Ibat.Brg_v3.07EG001860/Ibat.Brg_v3.07FG001340/Ibat.Brg_v3.07FG012430/Ibat.Brg_v3.07FG012440/Ibat.Brg_v3.09EG005410/Ibat.Brg_v3.09EG005430	11
GO:0051762	sesquiterpene biosynthetic process	11/1218	425/184965	0.000147806	0.00759594	0.0070177	Ibat.Brg_v3.07AG001450/Ibat.Brg_v3.07BG001500/Ibat.Brg_v3.07DG000910/Ibat.Brg_v3.07DG000930/Ibat.Brg_v3.07EG001840/Ibat.Brg_v3.07EG001860/Ibat.Brg_v3.07FG001340/Ibat.Brg_v3.07FG012430/Ibat.Brg_v3.07FG012440/Ibat.Brg_v3.09EG005410/Ibat.Brg_v3.09EG005430	11
GO:0034722	gamma-glutamyl-peptidase activity	3/1218	16/184965	0.000149613	0.00759594	0.0070177	Ibat.Brg_v3.02BG011400/Ibat.Brg_v3.02DG009720/Ibat.Brg_v3.02EG007650	3
GO:0010334	sesquiterpene synthase activity	11/1218	426/184965	0.000150833	0.00759594	0.0070177	Ibat.Brg_v3.07AG001450/Ibat.Brg_v3.07BG001500/Ibat.Brg_v3.07DG000910/Ibat.Brg_v3.07DG000930/Ibat.Brg_v3.07EG001840/Ibat.Brg_v3.07EG001860/Ibat.Brg_v3.07FG001340/Ibat.Brg_v3.07FG012430/Ibat.Brg_v3.07FG012440/Ibat.Brg_v3.09EG005410/Ibat.Brg_v3.09EG005430	11
GO:0016679	oxidoreductase activity, acting on diphenols and related substances as donors	6/1218	121/184965	0.000162673	0.0080316	0.00742019	Ibat.Brg_v3.10AG003890/Ibat.Brg_v3.10BG004060/Ibat.Brg_v3.10CG004660/Ibat.Brg_v3.10DG004520/Ibat.Brg_v3.10EG004100/Ibat.Brg_v3.10FG003050	6
GO:0050667	homocysteine metabolic process	4/1218	42/184965	0.0001716	0.00824449	0.00761688	Ibat.Brg_v3.12BG017390/Ibat.Brg_v3.12CG019960/Ibat.Brg_v3.12DG018610/Ibat.Brg_v3.12EG016540	4
GO:0010333	terpene synthase activity	11/1218	433/184965	0.000173534	0.00824449	0.00761688	Ibat.Brg_v3.07AG001450/Ibat.Brg_v3.07BG001500/Ibat.Brg_v3.07DG000910/Ibat.Brg_v3.07DG000930/Ibat.Brg_v3.07EG001840/Ibat.Brg_v3.07EG001860/Ibat.Brg_v3.07FG001340/Ibat.Brg_v3.07FG012430/Ibat.Brg_v3.07FG012440/Ibat.Brg_v3.09EG005410/Ibat.Brg_v3.09EG005430	11
GO:0009975	cyclase activity	10/1218	367/184965	0.000193977	0.00904508	0.00835652	Ibat.Brg_v3.07AG001450/Ibat.Brg_v3.07BG001500/Ibat.Brg_v3.07DG000910/Ibat.Brg_v3.07DG000930/Ibat.Brg_v3.07EG001840/Ibat.Brg_v3.07EG001860/Ibat.Brg_v3.07FG001340/Ibat.Brg_v3.07FG012430/Ibat.Brg_v3.07FG012440/Ibat.Brg_v3.12EG020290	10
GO:0042631	cellular response to water deprivation	9/1218	303/184965	0.000213154	0.00958431	0.00885469	Ibat.Brg_v3.01AG020110/Ibat.Brg_v3.01CG021970/Ibat.Brg_v3.01FG004420/Ibat.Brg_v3.01FG018490/Ibat.Brg_v3.12BG017390/Ibat.Brg_v3.12CG019960/Ibat.Brg_v3.12CG024360/Ibat.Brg_v3.12DG018610/Ibat.Brg_v3.12EG016540	9
GO:0071462	cellular response to water stimulus	9/1218	303/184965	0.000213154	0.00958431	0.00885469	Ibat.Brg_v3.01AG020110/Ibat.Brg_v3.01CG021970/Ibat.Brg_v3.01FG004420/Ibat.Brg_v3.01FG018490/Ibat.Brg_v3.12BG017390/Ibat.Brg_v3.12CG019960/Ibat.Brg_v3.12CG024360/Ibat.Brg_v3.12DG018610/Ibat.Brg_v3.12EG016540	9
GO:0016106	sesquiterpenoid biosynthetic process	9/1218	307/184965	0.000234738	0.0103696	0.00958025	Ibat.Brg_v3.07AG001450/Ibat.Brg_v3.07BG001500/Ibat.Brg_v3.07DG000910/Ibat.Brg_v3.07DG000930/Ibat.Brg_v3.07EG001840/Ibat.Brg_v3.07EG001860/Ibat.Brg_v3.07FG001340/Ibat.Brg_v3.07FG012430/Ibat.Brg_v3.07FG012440	9
GO:0042809	vitamin D receptor binding	3/1218	19/184965	0.000255093	0.0107616	0.0099424	Ibat.Brg_v3.05CG012480/Ibat.Brg_v3.05DG015440/Ibat.Brg_v3.12AG021990	3
GO:0050521	alpha-glucan, water dikinase activity	3/1218	19/184965	0.000255093	0.0107616	0.0099424	Ibat.Brg_v3.07EG005680/Ibat.Brg_v3.07EG005730/Ibat.Brg_v3.07FG004970	3
GO:0033559	unsaturated fatty acid metabolic process	8/1218	246/184965	0.000258838	0.0107616	0.0099424	Ibat.Brg_v3.06AG023820/Ibat.Brg_v3.06BG022340/Ibat.Brg_v3.06CG025170/Ibat.Brg_v3.06EG020170/Ibat.Brg_v3.06FG020990/Ibat.Brg_v3.10DG015930/Ibat.Brg_v3.10EG014860/Ibat.Brg_v3.10FG009720	8
GO:2000762	regulation of phenylpropanoid metabolic process	6/1218	132/184965	0.000260707	0.0107616	0.0099424	Ibat.Brg_v3.02BG029740/Ibat.Brg_v3.02BG030470/Ibat.Brg_v3.02BG030620/Ibat.Brg_v3.02CG028650/Ibat.Brg_v3.02EG026270/Ibat.Brg_v3.02FG028860	6
GO:0006714	sesquiterpenoid metabolic process	11/1218	469/184965	0.000341431	0.0138665	0.0128109	Ibat.Brg_v3.07AG001450/Ibat.Brg_v3.07BG001500/Ibat.Brg_v3.07DG000910/Ibat.Brg_v3.07DG000930/Ibat.Brg_v3.07EG001840/Ibat.Brg_v3.07EG001860/Ibat.Brg_v3.07FG001340/Ibat.Brg_v3.07FG012430/Ibat.Brg_v3.07FG012440/Ibat.Brg_v3.08BG003260/Ibat.Brg_v3.08EG003220	11
GO:0010223	secondary shoot formation	8/1218	260/184965	0.000374338	0.0147203	0.0135997	Ibat.Brg_v3.02BG002540/Ibat.Brg_v3.02DG002540/Ibat.Brg_v3.02EG002330/Ibat.Brg_v3.02FG002200/Ibat.Brg_v3.14AG018240/Ibat.Brg_v3.14DG014840/Ibat.Brg_v3.14FG017970/Ibat.Brg_v3.S108700	8
GO:0010346	shoot axis formation	8/1218	260/184965	0.000374338	0.0147203	0.0135997	Ibat.Brg_v3.02BG002540/Ibat.Brg_v3.02DG002540/Ibat.Brg_v3.02EG002330/Ibat.Brg_v3.02FG002200/Ibat.Brg_v3.14AG018240/Ibat.Brg_v3.14DG014840/Ibat.Brg_v3.14FG017970/Ibat.Brg_v3.S108700	8
GO:0009625	response to insect	9/1218	328/184965	0.000379993	0.0147203	0.0135997	Ibat.Brg_v3.07AG001450/Ibat.Brg_v3.07BG001500/Ibat.Brg_v3.07DG000910/Ibat.Brg_v3.07DG000930/Ibat.Brg_v3.07EG001840/Ibat.Brg_v3.07EG001860/Ibat.Brg_v3.07FG001340/Ibat.Brg_v3.07FG012430/Ibat.Brg_v3.07FG012440	9
GO:1901568	fatty acid derivative metabolic process	9/1218	333/184965	0.000423731	0.016166	0.0149353	Ibat.Brg_v3.06AG023820/Ibat.Brg_v3.06BG022340/Ibat.Brg_v3.06CG025170/Ibat.Brg_v3.06EG020170/Ibat.Brg_v3.06FG020990/Ibat.Brg_v3.10DG015930/Ibat.Brg_v3.10EG014860/Ibat.Brg_v3.10FG009720/Ibat.Brg_v3.11BG014930	9
GO:0016838	carbon-oxygen lyase activity, acting on phosphates	11/1218	494/184965	0.000525163	0.0197367	0.0182343	Ibat.Brg_v3.07AG001450/Ibat.Brg_v3.07BG001500/Ibat.Brg_v3.07DG000910/Ibat.Brg_v3.07DG000930/Ibat.Brg_v3.07EG001840/Ibat.Brg_v3.07EG001860/Ibat.Brg_v3.07FG001340/Ibat.Brg_v3.07FG012430/Ibat.Brg_v3.07FG012440/Ibat.Brg_v3.09EG005410/Ibat.Brg_v3.09EG005430	11
GO:0006817	phosphate ion transport	5/1218	100/184965	0.000551504	0.0204219	0.0188673	Ibat.Brg_v3.10BG022220/Ibat.Brg_v3.10CG021590/Ibat.Brg_v3.10DG023640/Ibat.Brg_v3.10FG018060/Ibat.Brg_v3.13AG023150	5
GO:0009808	lignin metabolic process	10/1218	422/184965	0.000578076	0.0209035	0.0193122	Ibat.Brg_v3.03AG005250/Ibat.Brg_v3.03BG005370/Ibat.Brg_v3.03BG005420/Ibat.Brg_v3.03BG005430/Ibat.Brg_v3.03FG004420/Ibat.Brg_v3.03FG004460/Ibat.Brg_v3.03FG004470/Ibat.Brg_v3.03FG005440/Ibat.Brg_v3.03FG005470/Ibat.Brg_v3.05CG020980	10
GO:0001763	morphogenesis of a branching structure	8/1218	278/184965	0.000581114	0.0209035	0.0193122	Ibat.Brg_v3.02BG002540/Ibat.Brg_v3.02DG002540/Ibat.Brg_v3.02EG002330/Ibat.Brg_v3.02FG002200/Ibat.Brg_v3.14AG018240/Ibat.Brg_v3.14DG014840/Ibat.Brg_v3.14FG017970/Ibat.Brg_v3.S108700	8
GO:0009970	cellular response to sulfate starvation	4/1218	59/184965	0.000638603	0.0226479	0.0209238	Ibat.Brg_v3.12BG017390/Ibat.Brg_v3.12CG019960/Ibat.Brg_v3.12DG018610/Ibat.Brg_v3.12EG016540	4
GO:0016781	phosphotransferase activity, paired acceptors	3/1218	26/184965	0.000661346	0.0231287	0.021368	Ibat.Brg_v3.07EG005680/Ibat.Brg_v3.07EG005730/Ibat.Brg_v3.07FG004970	3
GO:0031122	cytoplasmic microtubule organization	10/1218	433/184965	0.000703297	0.0242589	0.0224122	Ibat.Brg_v3.01BG035930/Ibat.Brg_v3.01EG033410/Ibat.Brg_v3.01EG034310/Ibat.Brg_v3.01FG026970/Ibat.Brg_v3.05EG017150/Ibat.Brg_v3.06BG014330/Ibat.Brg_v3.10DG019970/Ibat.Brg_v3.12AG003650/Ibat.Brg_v3.12FG026670/Ibat.Brg_v3.12FG028250	10
GO:0004556	alpha-amylase activity	4/1218	61/184965	0.000724658	0.024658	0.0227809	Ibat.Brg_v3.09BG006170/Ibat.Brg_v3.09EG005230/Ibat.Brg_v3.09EG005240/Ibat.Brg_v3.09FG006560	4
GO:0035265	organ growth	4/1218	62/184965	0.000770618	0.0258722	0.0239027	Ibat.Brg_v3.01EG031640/Ibat.Brg_v3.01FG025190/Ibat.Brg_v3.09DG031910/Ibat.Brg_v3.09FG029960	4
GO:0016160	amylase activity	5/1218	111/184965	0.000884786	0.0291923	0.02697	Ibat.Brg_v3.08EG002060/Ibat.Brg_v3.09BG006170/Ibat.Brg_v3.09EG005230/Ibat.Brg_v3.09EG005240/Ibat.Brg_v3.09FG006560	5
GO:0043622	cortical microtubule organization	9/1218	370/184965	0.000893283	0.0291923	0.02697	Ibat.Brg_v3.01BG035930/Ibat.Brg_v3.01EG033410/Ibat.Brg_v3.01EG034310/Ibat.Brg_v3.01FG026970/Ibat.Brg_v3.05EG017150/Ibat.Brg_v3.06BG014330/Ibat.Brg_v3.10DG019970/Ibat.Brg_v3.12AG003650/Ibat.Brg_v3.12FG028250	9
GO:0008242	omega peptidase activity	3/1218	29/184965	0.000915883	0.0291923	0.02697	Ibat.Brg_v3.02BG011400/Ibat.Brg_v3.02DG009720/Ibat.Brg_v3.02EG007650	3
GO:0046900	tetrahydrofolylpolyglutamate metabolic process	3/1218	29/184965	0.000915883	0.0291923	0.02697	Ibat.Brg_v3.02BG011400/Ibat.Brg_v3.02DG009720/Ibat.Brg_v3.02EG007650	3
GO:0019344	cysteine biosynthetic process	4/1218	66/184965	0.000975143	0.0306926	0.0283561	Ibat.Brg_v3.12BG017390/Ibat.Brg_v3.12CG019960/Ibat.Brg_v3.12DG018610/Ibat.Brg_v3.12EG016540	4
GO:0044273	sulfur compound catabolic process	5/1218	120/184965	0.00125345	0.0367039	0.0339098	Ibat.Brg_v3.07AG022800/Ibat.Brg_v3.12BG017390/Ibat.Brg_v3.12CG019960/Ibat.Brg_v3.12DG018610/Ibat.Brg_v3.12EG016540	5
GO:0048639	positive regulation of developmental growth	5/1218	121/184965	0.00130046	0.0367039	0.0339098	Ibat.Brg_v3.01EG031640/Ibat.Brg_v3.01FG025190/Ibat.Brg_v3.03DG001980/Ibat.Brg_v3.09DG031910/Ibat.Brg_v3.09FG029960	5
GO:0003018	vascular process in circulatory system	3/1218	33/184965	0.00134105	0.0367039	0.0339098	Ibat.Brg_v3.10DG015930/Ibat.Brg_v3.10EG014860/Ibat.Brg_v3.10FG009720	3
GO:0009810	stilbene metabolic process	3/1218	33/184965	0.00134105	0.0367039	0.0339098	Ibat.Brg_v3.10DG015930/Ibat.Brg_v3.10EG014860/Ibat.Brg_v3.10FG009720	3
GO:0015643	toxic substance binding	3/1218	33/184965	0.00134105	0.0367039	0.0339098	Ibat.Brg_v3.10DG015930/Ibat.Brg_v3.10EG014860/Ibat.Brg_v3.10FG009720	3
GO:0035150	regulation of tube size	3/1218	33/184965	0.00134105	0.0367039	0.0339098	Ibat.Brg_v3.10DG015930/Ibat.Brg_v3.10EG014860/Ibat.Brg_v3.10FG009720	3
GO:0035296	regulation of tube diameter	3/1218	33/184965	0.00134105	0.0367039	0.0339098	Ibat.Brg_v3.10DG015930/Ibat.Brg_v3.10EG014860/Ibat.Brg_v3.10FG009720	3
GO:0046272	stilbene catabolic process	3/1218	33/184965	0.00134105	0.0367039	0.0339098	Ibat.Brg_v3.10DG015930/Ibat.Brg_v3.10EG014860/Ibat.Brg_v3.10FG009720	3
GO:0050880	GO:0050880	3/1218	33/184965	0.00134105	0.0367039	0.0339098	Ibat.Brg_v3.10DG015930/Ibat.Brg_v3.10EG014860/Ibat.Brg_v3.10FG009720	3
GO:0097176	epoxide metabolic process	3/1218	33/184965	0.00134105	0.0367039	0.0339098	Ibat.Brg_v3.10DG015930/Ibat.Brg_v3.10EG014860/Ibat.Brg_v3.10FG009720	3
GO:0097746	blood vessel diameter maintenance	3/1218	33/184965	0.00134105	0.0367039	0.0339098	Ibat.Brg_v3.10DG015930/Ibat.Brg_v3.10EG014860/Ibat.Brg_v3.10FG009720	3
GO:0097755	obsolete positive regulation of blood vessel diameter	3/1218	33/184965	0.00134105	0.0367039	0.0339098	Ibat.Brg_v3.10DG015930/Ibat.Brg_v3.10EG014860/Ibat.Brg_v3.10FG009720	3
GO:0016628	oxidoreductase activity, acting on the CH-CH group of donors, NAD or NADP as acceptor	5/1218	123/184965	0.00139838	0.0378616	0.0349793	Ibat.Brg_v3.03AG028660/Ibat.Brg_v3.03CG025040/Ibat.Brg_v3.03DG018780/Ibat.Brg_v3.03FG026660/Ibat.Brg_v3.08FG023180	5
GO:0016759	cellulose synthase activity	6/1218	188/184965	0.0016532	0.0442846	0.0409134	Ibat.Brg_v3.01BG035930/Ibat.Brg_v3.01EG033410/Ibat.Brg_v3.01EG034310/Ibat.Brg_v3.01FG026970/Ibat.Brg_v3.12FG018340/Ibat.Brg_v3.12FG028250	6
GO:0009833	plant-type primary cell wall biogenesis	6/1218	190/184965	0.00174378	0.0462193	0.0427008	Ibat.Brg_v3.01BG035930/Ibat.Brg_v3.01EG033410/Ibat.Brg_v3.01EG034310/Ibat.Brg_v3.01FG026970/Ibat.Brg_v3.12FG018340/Ibat.Brg_v3.12FG028250	6
GO:0004252	serine-type endopeptidase activity	8/1218	332/184965	0.00179767	0.0471515	0.0435621	Ibat.Brg_v3.02BG002540/Ibat.Brg_v3.02DG002540/Ibat.Brg_v3.02EG002330/Ibat.Brg_v3.02FG002200/Ibat.Brg_v3.14AG018240/Ibat.Brg_v3.14DG014840/Ibat.Brg_v3.14FG017970/Ibat.Brg_v3.S108700	8
GO:0055062	phosphate ion homeostasis	5/1218	131/184965	0.00184503	0.0474061	0.0437973	Ibat.Brg_v3.10BG022220/Ibat.Brg_v3.10CG021590/Ibat.Brg_v3.10DG023640/Ibat.Brg_v3.10FG018060/Ibat.Brg_v3.13FG001710	5
GO:0072506	trivalent inorganic anion homeostasis	5/1218	131/184965	0.00184503	0.0474061	0.0437973	Ibat.Brg_v3.10BG022220/Ibat.Brg_v3.10CG021590/Ibat.Brg_v3.10DG023640/Ibat.Brg_v3.10FG018060/Ibat.Brg_v3.13FG001710	5

## Sheet: M1-125T-F_vs_M1-125-F_down
ID	Description	GeneRatio	BgRatio	pvalue	p.adjust	qvalue	geneID	Count
GO:0009228	thiamine biosynthetic process	6/786	20/184965	2.12864e-10	2.3596e-07	2.06366e-07	Ibat.Brg_v3.02BG013020/Ibat.Brg_v3.02CG010430/Ibat.Brg_v3.02EG009400/Ibat.Brg_v3.02FG014470/Ibat.Brg_v3.14AG019520/Ibat.Brg_v3.14CG017330	6
GO:0042724	thiamine-containing compound biosynthetic process	6/786	20/184965	2.12864e-10	2.3596e-07	2.06366e-07	Ibat.Brg_v3.02BG013020/Ibat.Brg_v3.02CG010430/Ibat.Brg_v3.02EG009400/Ibat.Brg_v3.02FG014470/Ibat.Brg_v3.14AG019520/Ibat.Brg_v3.14CG017330	6
GO:0006772	thiamine metabolic process	6/786	46/184965	4.68272e-08	2.5954e-05	2.26989e-05	Ibat.Brg_v3.02BG013020/Ibat.Brg_v3.02CG010430/Ibat.Brg_v3.02EG009400/Ibat.Brg_v3.02FG014470/Ibat.Brg_v3.14AG019520/Ibat.Brg_v3.14CG017330	6
GO:0042723	thiamine-containing compound metabolic process	6/786	46/184965	4.68272e-08	2.5954e-05	2.26989e-05	Ibat.Brg_v3.02BG013020/Ibat.Brg_v3.02CG010430/Ibat.Brg_v3.02EG009400/Ibat.Brg_v3.02FG014470/Ibat.Brg_v3.14AG019520/Ibat.Brg_v3.14CG017330	6
GO:0001653	peptide receptor activity	7/786	93/184965	1.68146e-07	7.45559e-05	6.52052e-05	Ibat.Brg_v3.01DG025610/Ibat.Brg_v3.01FG029320/Ibat.Brg_v3.02AG003660/Ibat.Brg_v3.03EG014470/Ibat.Brg_v3.03FG024960/Ibat.Brg_v3.12BG003490/Ibat.Brg_v3.12EG003160	7
GO:0047134	protein-disulfide reductase (NAD(P)) activity	8/786	168/184965	7.50384e-07	0.000277267	0.000242493	Ibat.Brg_v3.03AG010700/Ibat.Brg_v3.03BG009330/Ibat.Brg_v3.03CG008060/Ibat.Brg_v3.03DG006430/Ibat.Brg_v3.03EG001980/Ibat.Brg_v3.03FG011590/Ibat.Brg_v3.06FG015690/Ibat.Brg_v3.12AG007650	8
GO:0002832	negative regulation of response to biotic stimulus	8/786	177/184965	1.11135e-06	0.000312983	0.000273729	Ibat.Brg_v3.01EG017160/Ibat.Brg_v3.04EG000220/Ibat.Brg_v3.08AG015460/Ibat.Brg_v3.08EG016260/Ibat.Brg_v3.08EG016270/Ibat.Brg_v3.08FG021360/Ibat.Brg_v3.08FG021600/Ibat.Brg_v3.12EG003250	8
GO:0045454	cell redox homeostasis	9/786	240/184965	1.12939e-06	0.000312983	0.000273729	Ibat.Brg_v3.03AG010700/Ibat.Brg_v3.03BG009330/Ibat.Brg_v3.03CG008060/Ibat.Brg_v3.03DG006430/Ibat.Brg_v3.03EG001980/Ibat.Brg_v3.03FG011590/Ibat.Brg_v3.06FG015690/Ibat.Brg_v3.09AG002790/Ibat.Brg_v3.12AG007650	9
GO:0004791	thioredoxin-disulfide reductase activity	8/786	189/184965	1.81499e-06	0.000411297	0.000359712	Ibat.Brg_v3.03AG010700/Ibat.Brg_v3.03BG009330/Ibat.Brg_v3.03CG008060/Ibat.Brg_v3.03DG006430/Ibat.Brg_v3.03EG001980/Ibat.Brg_v3.03FG011590/Ibat.Brg_v3.06FG015690/Ibat.Brg_v3.12AG007650	8
GO:0043901	obsolete negative regulation of multi-organism process	8/786	191/184965	1.96296e-06	0.000411297	0.000359712	Ibat.Brg_v3.01EG017160/Ibat.Brg_v3.04EG000220/Ibat.Brg_v3.08AG015460/Ibat.Brg_v3.08EG016260/Ibat.Brg_v3.08EG016270/Ibat.Brg_v3.08FG021360/Ibat.Brg_v3.08FG021600/Ibat.Brg_v3.12EG003250	8
GO:0015035	protein-disulfide reductase activity	8/786	192/184965	2.04071e-06	0.000411297	0.000359712	Ibat.Brg_v3.03AG010700/Ibat.Brg_v3.03BG009330/Ibat.Brg_v3.03CG008060/Ibat.Brg_v3.03DG006430/Ibat.Brg_v3.03EG001980/Ibat.Brg_v3.03FG011590/Ibat.Brg_v3.06FG015690/Ibat.Brg_v3.12AG007650	8
GO:1902288	regulation of defense response to oomycetes	5/786	59/184965	5.6653e-06	0.00104667	0.000915394	Ibat.Brg_v3.08AG015460/Ibat.Brg_v3.08EG016260/Ibat.Brg_v3.08EG016270/Ibat.Brg_v3.08FG021360/Ibat.Brg_v3.08FG021600	5
GO:0009934	regulation of meristem structural organization	7/786	162/184965	7.02085e-06	0.00119733	0.00104716	Ibat.Brg_v3.08AG003790/Ibat.Brg_v3.08BG003650/Ibat.Brg_v3.08CG003910/Ibat.Brg_v3.08EG003650/Ibat.Brg_v3.09AG006010/Ibat.Brg_v3.09BG005510/Ibat.Brg_v3.09CG004260	7
GO:0009691	cytokinin biosynthetic process	5/786	63/184965	7.84319e-06	0.00121244	0.00106038	Ibat.Brg_v3.05BG019290/Ibat.Brg_v3.09AG006010/Ibat.Brg_v3.09BG005510/Ibat.Brg_v3.09CG004260/Ibat.Brg_v3.12BG004680	5
GO:0032102	negative regulation of response to external stimulus	8/786	232/184965	8.20327e-06	0.00121244	0.00106038	Ibat.Brg_v3.01EG017160/Ibat.Brg_v3.04EG000220/Ibat.Brg_v3.08AG015460/Ibat.Brg_v3.08EG016260/Ibat.Brg_v3.08EG016270/Ibat.Brg_v3.08FG021360/Ibat.Brg_v3.08FG021600/Ibat.Brg_v3.12EG003250	8
GO:0016671	oxidoreductase activity, acting on a sulfur group of donors, disulfide as acceptor	8/786	240/184965	1.04877e-05	0.0014532	0.00127094	Ibat.Brg_v3.03AG010700/Ibat.Brg_v3.03BG009330/Ibat.Brg_v3.03CG008060/Ibat.Brg_v3.03DG006430/Ibat.Brg_v3.03EG001980/Ibat.Brg_v3.03FG011590/Ibat.Brg_v3.06FG015690/Ibat.Brg_v3.12AG007650	8
GO:0017046	peptide hormone binding	4/786	33/184965	1.20053e-05	0.00152306	0.00133204	Ibat.Brg_v3.01DG025610/Ibat.Brg_v3.01FG029320/Ibat.Brg_v3.03EG014470/Ibat.Brg_v3.03FG024960	4
GO:0042277	peptide binding	11/786	498/184965	1.23659e-05	0.00152306	0.00133204	Ibat.Brg_v3.01DG025610/Ibat.Brg_v3.01FG029320/Ibat.Brg_v3.03EG014470/Ibat.Brg_v3.03FG024960/Ibat.Brg_v3.08DG001380/Ibat.Brg_v3.11AG003600/Ibat.Brg_v3.11AG003920/Ibat.Brg_v3.11AG004060/Ibat.Brg_v3.12BG008500/Ibat.Brg_v3.14AG003210/Ibat.Brg_v3.15BG013310	11
GO:0043248	proteasome assembly	5/786	70/184965	1.3178e-05	0.00153767	0.00134482	Ibat.Brg_v3.01BG034710/Ibat.Brg_v3.06BG001280/Ibat.Brg_v3.06CG003580/Ibat.Brg_v3.12BG003490/Ibat.Brg_v3.12EG003160	5
GO:1900425	negative regulation of defense response to bacterium	6/786	124/184965	1.68581e-05	0.00186872	0.00163435	Ibat.Brg_v3.08AG015460/Ibat.Brg_v3.08EG016260/Ibat.Brg_v3.08EG016270/Ibat.Brg_v3.08FG021360/Ibat.Brg_v3.08FG021600/Ibat.Brg_v3.12EG003250	6
GO:0036289	peptidyl-serine autophosphorylation	4/786	37/184965	1.91169e-05	0.00201819	0.00176507	Ibat.Brg_v3.08AG003790/Ibat.Brg_v3.08BG003650/Ibat.Brg_v3.08CG003910/Ibat.Brg_v3.08EG003650	4
GO:0016668	oxidoreductase activity, acting on a sulfur group of donors, NAD(P) as acceptor	8/786	265/184965	2.13607e-05	0.00215258	0.00188261	Ibat.Brg_v3.03AG010700/Ibat.Brg_v3.03BG009330/Ibat.Brg_v3.03CG008060/Ibat.Brg_v3.03DG006430/Ibat.Brg_v3.03EG001980/Ibat.Brg_v3.03FG011590/Ibat.Brg_v3.06FG015690/Ibat.Brg_v3.12AG007650	8
GO:0015036	disulfide oxidoreductase activity	8/786	271/184965	2.50492e-05	0.00241453	0.0021117	Ibat.Brg_v3.03AG010700/Ibat.Brg_v3.03BG009330/Ibat.Brg_v3.03CG008060/Ibat.Brg_v3.03DG006430/Ibat.Brg_v3.03EG001980/Ibat.Brg_v3.03FG011590/Ibat.Brg_v3.06FG015690/Ibat.Brg_v3.12AG007650	8
GO:0005687	U4 snRNP	4/786	42/184965	3.18568e-05	0.00294277	0.00257369	Ibat.Brg_v3.03AG033020/Ibat.Brg_v3.12CG003720/Ibat.Brg_v3.12EG003360/Ibat.Brg_v3.14DG020040	4
GO:0042300	beta-amyrin synthase activity	3/786	15/184965	3.34814e-05	0.00296913	0.00259675	Ibat.Brg_v3.12EG013460/Ibat.Brg_v3.12FG013360/Ibat.Brg_v3.12FG013520	3
GO:0000387	spliceosomal snRNP assembly	5/786	87/184965	3.79082e-05	0.0032324	0.002827	Ibat.Brg_v3.01CG003160/Ibat.Brg_v3.04AG014610/Ibat.Brg_v3.12CG003720/Ibat.Brg_v3.12EG003360/Ibat.Brg_v3.14DG020040	5
GO:1901333	positive regulation of lateral root development	4/786	46/184965	4.58228e-05	0.00376256	0.00329067	Ibat.Brg_v3.01DG025610/Ibat.Brg_v3.01FG029320/Ibat.Brg_v3.03EG014470/Ibat.Brg_v3.03FG024960	4
GO:0034719	SMN-Sm protein complex	4/786	47/184965	4.9917e-05	0.00395236	0.00345666	Ibat.Brg_v3.03AG033020/Ibat.Brg_v3.12CG003720/Ibat.Brg_v3.12EG003360/Ibat.Brg_v3.14DG020040	4
GO:0016661	oxidoreductase activity, acting on other nitrogenous compounds as donors	4/786	48/184965	5.42718e-05	0.00401069	0.00350768	Ibat.Brg_v3.01AG021150/Ibat.Brg_v3.05BG031530/Ibat.Brg_v3.09EG000810/Ibat.Brg_v3.09FG002670	4
GO:1902025	nitrate import	4/786	48/184965	5.42718e-05	0.00401069	0.00350768	Ibat.Brg_v3.01DG025610/Ibat.Brg_v3.01FG029320/Ibat.Brg_v3.03EG014470/Ibat.Brg_v3.03FG024960	4
GO:0090548	response to nitrate starvation	4/786	50/184965	6.38037e-05	0.00456299	0.00399071	Ibat.Brg_v3.01DG025610/Ibat.Brg_v3.01FG029320/Ibat.Brg_v3.03EG014470/Ibat.Brg_v3.03FG024960	4
GO:0015271	outward rectifier potassium channel activity	3/786	19/184965	7.04057e-05	0.0048778	0.00426603	Ibat.Brg_v3.05AG001360/Ibat.Brg_v3.05DG003200/Ibat.Brg_v3.05EG000570	3
GO:0043101	purine-containing compound salvage	4/786	52/184965	7.45e-05	0.00500505	0.00437732	Ibat.Brg_v3.01EG016190/Ibat.Brg_v3.01FG015460/Ibat.Brg_v3.09BG005910/Ibat.Brg_v3.09DG016870	4
GO:0015292	uniporter activity	3/786	20/184965	8.25682e-05	0.00538393	0.00470869	Ibat.Brg_v3.03AG003470/Ibat.Brg_v3.03FG003370/Ibat.Brg_v3.12CG006800	3
GO:0010080	regulation of floral meristem growth	4/786	55/184965	9.29113e-05	0.00588527	0.00514715	Ibat.Brg_v3.08AG003790/Ibat.Brg_v3.08BG003650/Ibat.Brg_v3.08CG003910/Ibat.Brg_v3.08EG003650	4
GO:0015114	phosphate ion transmembrane transporter activity	4/786	57/184965	0.000106888	0.00630054	0.00551033	Ibat.Brg_v3.01EG016190/Ibat.Brg_v3.01FG015460/Ibat.Brg_v3.04AG007940/Ibat.Brg_v3.04BG008510	4
GO:0016662	oxidoreductase activity, acting on other nitrogenous compounds as donors, cytochrome as acceptor	3/786	22/184965	0.000110835	0.00630054	0.00551033	Ibat.Brg_v3.01AG021150/Ibat.Brg_v3.09EG000810/Ibat.Brg_v3.09FG002670	3
GO:0050421	nitrite reductase (NO-forming) activity	3/786	22/184965	0.000110835	0.00630054	0.00551033	Ibat.Brg_v3.01AG021150/Ibat.Brg_v3.09EG000810/Ibat.Brg_v3.09FG002670	3
GO:0098809	nitrite reductase activity	3/786	22/184965	0.000110835	0.00630054	0.00551033	Ibat.Brg_v3.01AG021150/Ibat.Brg_v3.09EG000810/Ibat.Brg_v3.09FG002670	3
GO:1900424	regulation of defense response to bacterium	8/786	337/184965	0.000114585	0.00635085	0.00555434	Ibat.Brg_v3.08AG015460/Ibat.Brg_v3.08EG016260/Ibat.Brg_v3.08EG016270/Ibat.Brg_v3.08FG021360/Ibat.Brg_v3.08FG021600/Ibat.Brg_v3.10DG001070/Ibat.Brg_v3.12EG003250/Ibat.Brg_v3.S048970	8
GO:0015137	citrate transmembrane transporter activity	3/786	24/184965	0.000144749	0.00746299	0.00652699	Ibat.Brg_v3.09CG016280/Ibat.Brg_v3.09EG018200/Ibat.Brg_v3.09FG019170	3
GO:0015746	citrate transport	3/786	24/184965	0.000144749	0.00746299	0.00652699	Ibat.Brg_v3.09CG016280/Ibat.Brg_v3.09EG018200/Ibat.Brg_v3.09FG019170	3
GO:0042895	obsolete antibiotic transmembrane transporter activity	3/786	24/184965	0.000144749	0.00746299	0.00652699	Ibat.Brg_v3.09CG016280/Ibat.Brg_v3.09EG018200/Ibat.Brg_v3.09FG019170	3
GO:0015173	aromatic amino acid transmembrane transporter activity	3/786	25/184965	0.000163967	0.0080936	0.00707852	Ibat.Brg_v3.05AG023050/Ibat.Brg_v3.12CG001610/Ibat.Brg_v3.12EG000810	3
GO:0035435	phosphate ion transmembrane transport	4/786	64/184965	0.000167932	0.0080936	0.00707852	Ibat.Brg_v3.01EG016190/Ibat.Brg_v3.01FG015460/Ibat.Brg_v3.04AG007940/Ibat.Brg_v3.04BG008510	4
GO:1901141	regulation of lignin biosynthetic process	4/786	64/184965	0.000167932	0.0080936	0.00707852	Ibat.Brg_v3.01DG025610/Ibat.Brg_v3.01FG029320/Ibat.Brg_v3.03EG014470/Ibat.Brg_v3.03FG024960	4
GO:0042891	obsolete antibiotic transport	4/786	67/184965	0.000200552	0.00918761	0.00803531	Ibat.Brg_v3.09CG016280/Ibat.Brg_v3.09EG018200/Ibat.Brg_v3.09FG019170/Ibat.Brg_v3.10BG021080	4
GO:0006842	tricarboxylic acid transport	3/786	27/184965	0.000207208	0.00918761	0.00803531	Ibat.Brg_v3.09CG016280/Ibat.Brg_v3.09EG018200/Ibat.Brg_v3.09FG019170	3
GO:0015142	tricarboxylic acid transmembrane transporter activity	3/786	27/184965	0.000207208	0.00918761	0.00803531	Ibat.Brg_v3.09CG016280/Ibat.Brg_v3.09EG018200/Ibat.Brg_v3.09FG019170	3
GO:0035674	tricarboxylic acid transmembrane transport	3/786	27/184965	0.000207208	0.00918761	0.00803531	Ibat.Brg_v3.09CG016280/Ibat.Brg_v3.09EG018200/Ibat.Brg_v3.09FG019170	3
GO:0034715	pICln-Sm protein complex	3/786	30/184965	0.000284895	0.0123846	0.0108313	Ibat.Brg_v3.12CG003720/Ibat.Brg_v3.12EG003360/Ibat.Brg_v3.14DG020040	3
GO:0004812	aminoacyl-tRNA ligase activity	7/786	296/184965	0.000311015	0.0130098	0.0113781	Ibat.Brg_v3.01BG033330/Ibat.Brg_v3.04BG006990/Ibat.Brg_v3.12DG006250/Ibat.Brg_v3.12EG006590/Ibat.Brg_v3.12FG005050/Ibat.Brg_v3.12FG006150/Ibat.Brg_v3.15FG009060	7
GO:0016875	ligase activity, forming carbon-oxygen bonds	7/786	296/184965	0.000311015	0.0130098	0.0113781	Ibat.Brg_v3.01BG033330/Ibat.Brg_v3.04BG006990/Ibat.Brg_v3.12DG006250/Ibat.Brg_v3.12EG006590/Ibat.Brg_v3.12FG005050/Ibat.Brg_v3.12FG006150/Ibat.Brg_v3.15FG009060	7
GO:1900376	regulation of secondary metabolite biosynthetic process	5/786	138/184965	0.000332875	0.0133249	0.0116537	Ibat.Brg_v3.01DG025610/Ibat.Brg_v3.01FG029320/Ibat.Brg_v3.03EG014470/Ibat.Brg_v3.03FG024960/Ibat.Brg_v3.15BG000810	5
GO:0048832	specification of plant organ number	4/786	77/184965	0.000342404	0.0133249	0.0116537	Ibat.Brg_v3.08AG003790/Ibat.Brg_v3.08BG003650/Ibat.Brg_v3.08CG003910/Ibat.Brg_v3.08EG003650	4
GO:0048833	specification of floral organ number	4/786	77/184965	0.000342404	0.0133249	0.0116537	Ibat.Brg_v3.08AG003790/Ibat.Brg_v3.08BG003650/Ibat.Brg_v3.08CG003910/Ibat.Brg_v3.08EG003650	4
GO:0016656	monodehydroascorbate reductase (NADH) activity	3/786	32/184965	0.000345856	0.0133249	0.0116537	Ibat.Brg_v3.01CG012690/Ibat.Brg_v3.12CG008720/Ibat.Brg_v3.12FG007450	3
GO:2000069	regulation of post-embryonic root development	6/786	215/184965	0.000348599	0.0133249	0.0116537	Ibat.Brg_v3.01DG025610/Ibat.Brg_v3.01FG029320/Ibat.Brg_v3.03EG014470/Ibat.Brg_v3.03FG024960/Ibat.Brg_v3.07BG009560/Ibat.Brg_v3.10DG001070	6
GO:0006418	tRNA aminoacylation for protein translation	7/786	303/184965	0.000357711	0.0134414	0.0117556	Ibat.Brg_v3.01BG033330/Ibat.Brg_v3.04BG006990/Ibat.Brg_v3.12DG006250/Ibat.Brg_v3.12EG006590/Ibat.Brg_v3.12FG005050/Ibat.Brg_v3.12FG006150/Ibat.Brg_v3.15FG009060	7
GO:0005372	water transmembrane transporter activity	6/786	220/184965	0.000393727	0.0143097	0.012515	Ibat.Brg_v3.09AG001220/Ibat.Brg_v3.09BG011480/Ibat.Brg_v3.09DG000850/Ibat.Brg_v3.09EG002130/Ibat.Brg_v3.09FG001140/Ibat.Brg_v3.10BG021080	6
GO:0015250	water channel activity	6/786	220/184965	0.000393727	0.0143097	0.012515	Ibat.Brg_v3.09AG001220/Ibat.Brg_v3.09BG011480/Ibat.Brg_v3.09DG000850/Ibat.Brg_v3.09EG002130/Ibat.Brg_v3.09FG001140/Ibat.Brg_v3.10BG021080	6
GO:0004832	valine-tRNA ligase activity	3/786	34/184965	0.000414629	0.014591	0.012761	Ibat.Brg_v3.01BG033330/Ibat.Brg_v3.04BG006990/Ibat.Brg_v3.15FG009060	3
GO:0006438	valyl-tRNA aminoacylation	3/786	34/184965	0.000414629	0.014591	0.012761	Ibat.Brg_v3.01BG033330/Ibat.Brg_v3.04BG006990/Ibat.Brg_v3.15FG009060	3
GO:0072528	pyrimidine-containing compound biosynthetic process	6/786	224/184965	0.000433011	0.0149998	0.0131185	Ibat.Brg_v3.02BG013020/Ibat.Brg_v3.02CG010430/Ibat.Brg_v3.02EG009400/Ibat.Brg_v3.02FG014470/Ibat.Brg_v3.14AG019520/Ibat.Brg_v3.14CG017330	6
GO:0048574	long-day photoperiodism, flowering	4/786	84/184965	0.000476879	0.0160188	0.0140097	Ibat.Brg_v3.09AG014130/Ibat.Brg_v3.09BG013400/Ibat.Brg_v3.09EG014090/Ibat.Brg_v3.09FG013890	4
GO:2000023	regulation of lateral root development	4/786	84/184965	0.000476879	0.0160188	0.0140097	Ibat.Brg_v3.01DG025610/Ibat.Brg_v3.01FG029320/Ibat.Brg_v3.03EG014470/Ibat.Brg_v3.03FG024960	4
GO:0072527	pyrimidine-containing compound metabolic process	7/786	319/184965	0.000485639	0.0160696	0.0140542	Ibat.Brg_v3.02BG013020/Ibat.Brg_v3.02CG010430/Ibat.Brg_v3.02EG009400/Ibat.Brg_v3.02FG014470/Ibat.Brg_v3.14AG019520/Ibat.Brg_v3.14CG017330/Ibat.Brg_v3.S040390	7
GO:0043038	amino acid activation	7/786	323/184965	0.000522713	0.016795	0.0146886	Ibat.Brg_v3.01BG033330/Ibat.Brg_v3.04BG006990/Ibat.Brg_v3.12DG006250/Ibat.Brg_v3.12EG006590/Ibat.Brg_v3.12FG005050/Ibat.Brg_v3.12FG006150/Ibat.Brg_v3.15FG009060	7
GO:0043039	tRNA aminoacylation	7/786	323/184965	0.000522713	0.016795	0.0146886	Ibat.Brg_v3.01BG033330/Ibat.Brg_v3.04BG006990/Ibat.Brg_v3.12DG006250/Ibat.Brg_v3.12EG006590/Ibat.Brg_v3.12FG005050/Ibat.Brg_v3.12FG006150/Ibat.Brg_v3.15FG009060	7
GO:0016667	oxidoreductase activity, acting on a sulfur group of donors	8/786	434/184965	0.000618352	0.0193272	0.0169032	Ibat.Brg_v3.03AG010700/Ibat.Brg_v3.03BG009330/Ibat.Brg_v3.03CG008060/Ibat.Brg_v3.03DG006430/Ibat.Brg_v3.03EG001980/Ibat.Brg_v3.03FG011590/Ibat.Brg_v3.06FG015690/Ibat.Brg_v3.12AG007650	8
GO:0005682	U5 snRNP	4/786	90/184965	0.000618957	0.0193272	0.0169032	Ibat.Brg_v3.03AG033020/Ibat.Brg_v3.12CG003720/Ibat.Brg_v3.12EG003360/Ibat.Brg_v3.14DG020040	4
GO:0071732	cellular response to nitric oxide	5/786	162/184965	0.00069027	0.0212546	0.0185888	Ibat.Brg_v3.09CG016280/Ibat.Brg_v3.09EG018200/Ibat.Brg_v3.09FG019170/Ibat.Brg_v3.10AG020530/Ibat.Brg_v3.10DG024920	5
GO:0005686	U2 snRNP	4/786	95/184965	0.000758374	0.0230317	0.0201431	Ibat.Brg_v3.03AG033020/Ibat.Brg_v3.12CG003720/Ibat.Brg_v3.12EG003360/Ibat.Brg_v3.14DG020040	4
GO:0019144	ADP-sugar diphosphatase activity	2/786	10/184965	0.000793429	0.0234538	0.0205122	Ibat.Brg_v3.14AG019520/Ibat.Brg_v3.14CG017330	2
GO:0080041	ADP-ribose pyrophosphohydrolase activity	2/786	10/184965	0.000793429	0.0234538	0.0205122	Ibat.Brg_v3.14AG019520/Ibat.Brg_v3.14CG017330	2
GO:0043455	regulation of secondary metabolic process	6/786	253/184965	0.000817204	0.0238387	0.0208489	Ibat.Brg_v3.01DG025610/Ibat.Brg_v3.01FG029320/Ibat.Brg_v3.03EG014470/Ibat.Brg_v3.03FG024960/Ibat.Brg_v3.12FG012660/Ibat.Brg_v3.15BG000810	6
GO:0031540	regulation of anthocyanin biosynthetic process	4/786	99/184965	0.000884824	0.0246422	0.0215516	Ibat.Brg_v3.01DG025610/Ibat.Brg_v3.01FG029320/Ibat.Brg_v3.03EG014470/Ibat.Brg_v3.03FG024960	4
GO:0006817	phosphate ion transport	4/786	100/184965	0.000918616	0.0246422	0.0215516	Ibat.Brg_v3.01EG016190/Ibat.Brg_v3.01FG015460/Ibat.Brg_v3.04AG007940/Ibat.Brg_v3.04BG008510	4
GO:0097526	spliceosomal tri-snRNP complex	5/786	174/184965	0.000950623	0.0246422	0.0215516	Ibat.Brg_v3.03AG033020/Ibat.Brg_v3.10FG009680/Ibat.Brg_v3.12CG003720/Ibat.Brg_v3.12EG003360/Ibat.Brg_v3.14DG020040	5
GO:0010497	plasmodesmata-mediated intercellular transport	4/786	101/184965	0.000953306	0.0246422	0.0215516	Ibat.Brg_v3.02BG012240/Ibat.Brg_v3.09AG006010/Ibat.Brg_v3.09BG005510/Ibat.Brg_v3.09CG004260	4
GO:0000979	RNA polymerase II core promoter sequence-specific DNA binding	2/786	11/184965	0.000967015	0.0246422	0.0215516	Ibat.Brg_v3.07DG017070/Ibat.Brg_v3.12AG004140	2
GO:0004352	glutamate dehydrogenase (NAD+) activity	2/786	11/184965	0.000967015	0.0246422	0.0215516	Ibat.Brg_v3.12CG028250/Ibat.Brg_v3.12FG024710	2
GO:0006168	adenine salvage	2/786	11/184965	0.000967015	0.0246422	0.0215516	Ibat.Brg_v3.01EG016190/Ibat.Brg_v3.01FG015460	2
GO:0010446	response to alkaline pH	2/786	11/184965	0.000967015	0.0246422	0.0215516	Ibat.Brg_v3.12CG028250/Ibat.Brg_v3.12FG024710	2
GO:0043096	purine nucleobase salvage	2/786	11/184965	0.000967015	0.0246422	0.0215516	Ibat.Brg_v3.01EG016190/Ibat.Brg_v3.01FG015460	2
GO:0046083	adenine metabolic process	2/786	11/184965	0.000967015	0.0246422	0.0215516	Ibat.Brg_v3.01EG016190/Ibat.Brg_v3.01FG015460	2
GO:0046084	adenine biosynthetic process	2/786	11/184965	0.000967015	0.0246422	0.0215516	Ibat.Brg_v3.01EG016190/Ibat.Brg_v3.01FG015460	2
GO:0008565	obsolete protein transporter activity	8/786	467/184965	0.000989322	0.0249242	0.0217982	Ibat.Brg_v3.09AG010990/Ibat.Brg_v3.09AG014130/Ibat.Brg_v3.09BG013400/Ibat.Brg_v3.09EG014090/Ibat.Brg_v3.09FG013890/Ibat.Brg_v3.11AG023390/Ibat.Brg_v3.12BG008500/Ibat.Brg_v3.15BG013310	8
GO:0005689	U12-type spliceosomal complex	4/786	105/184965	0.0011013	0.0270042	0.0236174	Ibat.Brg_v3.03AG033020/Ibat.Brg_v3.12CG003720/Ibat.Brg_v3.12EG003360/Ibat.Brg_v3.14DG020040	4
GO:0071731	response to nitric oxide	5/786	181/184965	0.00113269	0.0270042	0.0236174	Ibat.Brg_v3.09CG016280/Ibat.Brg_v3.09EG018200/Ibat.Brg_v3.09FG019170/Ibat.Brg_v3.10AG020530/Ibat.Brg_v3.10DG024920	5
GO:0097366	response to bronchodilator	5/786	181/184965	0.00113269	0.0270042	0.0236174	Ibat.Brg_v3.09CG016280/Ibat.Brg_v3.09EG018200/Ibat.Brg_v3.09FG019170/Ibat.Brg_v3.10AG020530/Ibat.Brg_v3.10DG024920	5
GO:0006833	water transport	7/786	370/184965	0.00115103	0.0270042	0.0236174	Ibat.Brg_v3.01AG027710/Ibat.Brg_v3.09AG001220/Ibat.Brg_v3.09BG011480/Ibat.Brg_v3.09DG000850/Ibat.Brg_v3.09EG002130/Ibat.Brg_v3.09FG001140/Ibat.Brg_v3.10BG021080	7
GO:0042044	fluid transport	7/786	370/184965	0.00115103	0.0270042	0.0236174	Ibat.Brg_v3.01AG027710/Ibat.Brg_v3.09AG001220/Ibat.Brg_v3.09BG011480/Ibat.Brg_v3.09DG000850/Ibat.Brg_v3.09EG002130/Ibat.Brg_v3.09FG001140/Ibat.Brg_v3.10BG021080	7
GO:0004818	glutamate-tRNA ligase activity	2/786	12/184965	0.00115715	0.0270042	0.0236174	Ibat.Brg_v3.12EG006590/Ibat.Brg_v3.12FG006150	2
GO:0044539	long-chain fatty acid import into cell	2/786	12/184965	0.00115715	0.0270042	0.0236174	Ibat.Brg_v3.12EG006590/Ibat.Brg_v3.12FG006150	2
GO:2000652	regulation of secondary cell wall biogenesis	4/786	107/184965	0.00118102	0.0270742	0.0236786	Ibat.Brg_v3.01DG025610/Ibat.Brg_v3.01FG029320/Ibat.Brg_v3.03EG014470/Ibat.Brg_v3.03FG024960	4
GO:1900150	regulation of defense response to fungus	6/786	272/184965	0.00118457	0.0270742	0.0236786	Ibat.Brg_v3.08AG015460/Ibat.Brg_v3.08EG016260/Ibat.Brg_v3.08EG016270/Ibat.Brg_v3.08FG021360/Ibat.Brg_v3.08FG021600/Ibat.Brg_v3.10DG001070	6
GO:0048571	long-day photoperiodism	4/786	108/184965	0.00122236	0.0276528	0.0241846	Ibat.Brg_v3.09AG014130/Ibat.Brg_v3.09BG013400/Ibat.Brg_v3.09EG014090/Ibat.Brg_v3.09FG013890	4
GO:0006487	protein N-linked glycosylation	6/786	275/184965	0.00125253	0.0280492	0.0245313	Ibat.Brg_v3.01DG026360/Ibat.Brg_v3.03CG027380/Ibat.Brg_v3.09BG006010/Ibat.Brg_v3.12BG004590/Ibat.Brg_v3.12BG007780/Ibat.Brg_v3.12EG007510	6
GO:0042364	water-soluble vitamin biosynthetic process	6/786	278/184965	0.00132344	0.0293406	0.0256607	Ibat.Brg_v3.02BG013020/Ibat.Brg_v3.02CG010430/Ibat.Brg_v3.02EG009400/Ibat.Brg_v3.02FG014470/Ibat.Brg_v3.14AG019520/Ibat.Brg_v3.14CG017330	6
GO:0008408	3'-5' exonuclease activity	6/786	279/184965	0.00134774	0.0295835	0.0258732	Ibat.Brg_v3.02DG005860/Ibat.Brg_v3.07FG014260/Ibat.Brg_v3.10DG018660/Ibat.Brg_v3.12CG008590/Ibat.Brg_v3.12FG004830/Ibat.Brg_v3.14DG020110	6
GO:0031537	regulation of anthocyanin metabolic process	5/786	189/184965	0.001371	0.0297992	0.0260618	Ibat.Brg_v3.01DG025610/Ibat.Brg_v3.01FG029320/Ibat.Brg_v3.03EG014470/Ibat.Brg_v3.03FG024960/Ibat.Brg_v3.15FG022150	5
GO:0010496	intercellular transport	4/786	112/184965	0.00139785	0.0300876	0.0263141	Ibat.Brg_v3.02BG012240/Ibat.Brg_v3.09AG006010/Ibat.Brg_v3.09BG005510/Ibat.Brg_v3.09CG004260	4
GO:0000175	3'-5'-exoribonuclease activity	4/786	117/184965	0.00164099	0.0349814	0.0305941	Ibat.Brg_v3.02DG005860/Ibat.Brg_v3.07FG014260/Ibat.Brg_v3.10DG018660/Ibat.Brg_v3.12CG008590	4
GO:0042562	hormone binding	6/786	294/184965	0.00175469	0.0351586	0.0307491	Ibat.Brg_v3.01DG025610/Ibat.Brg_v3.01FG029320/Ibat.Brg_v3.03EG014470/Ibat.Brg_v3.03FG024960/Ibat.Brg_v3.09DG010580/Ibat.Brg_v3.09EG009420	6
GO:0018973	trinitrotoluene metabolic process	3/786	56/184965	0.00179203	0.0351586	0.0307491	Ibat.Brg_v3.11AG003600/Ibat.Brg_v3.11AG003920/Ibat.Brg_v3.11AG004060	3
GO:0018974	2,4,6-trinitrotoluene metabolic process	3/786	56/184965	0.00179203	0.0351586	0.0307491	Ibat.Brg_v3.11AG003600/Ibat.Brg_v3.11AG003920/Ibat.Brg_v3.11AG004060	3
GO:0019326	nitrotoluene metabolic process	3/786	56/184965	0.00179203	0.0351586	0.0307491	Ibat.Brg_v3.11AG003600/Ibat.Brg_v3.11AG003920/Ibat.Brg_v3.11AG004060	3
GO:0046256	2,4,6-trinitrotoluene catabolic process	3/786	56/184965	0.00179203	0.0351586	0.0307491	Ibat.Brg_v3.11AG003600/Ibat.Brg_v3.11AG003920/Ibat.Brg_v3.11AG004060	3
GO:0046260	trinitrotoluene catabolic process	3/786	56/184965	0.00179203	0.0351586	0.0307491	Ibat.Brg_v3.11AG003600/Ibat.Brg_v3.11AG003920/Ibat.Brg_v3.11AG004060	3
GO:0046263	nitrotoluene catabolic process	3/786	56/184965	0.00179203	0.0351586	0.0307491	Ibat.Brg_v3.11AG003600/Ibat.Brg_v3.11AG003920/Ibat.Brg_v3.11AG004060	3
GO:0072490	toluene-containing compound metabolic process	3/786	56/184965	0.00179203	0.0351586	0.0307491	Ibat.Brg_v3.11AG003600/Ibat.Brg_v3.11AG003920/Ibat.Brg_v3.11AG004060	3
GO:0072491	toluene-containing compound catabolic process	3/786	56/184965	0.00179203	0.0351586	0.0307491	Ibat.Brg_v3.11AG003600/Ibat.Brg_v3.11AG003920/Ibat.Brg_v3.11AG004060	3
GO:0005685	U1 snRNP	4/786	124/184965	0.00202862	0.0394514	0.0345035	Ibat.Brg_v3.03AG033020/Ibat.Brg_v3.12CG003720/Ibat.Brg_v3.12EG003360/Ibat.Brg_v3.14DG020040	4
GO:0080119	ER body organization	2/786	17/184965	0.00235107	0.0453245	0.03964	Ibat.Brg_v3.04BG032050/Ibat.Brg_v3.14FG010770	2
GO:0043434	response to peptide hormone	3/786	62/184965	0.0023993	0.0456229	0.039901	Ibat.Brg_v3.12BG008480/Ibat.Brg_v3.12EG006590/Ibat.Brg_v3.12FG006150	3
GO:0005665	RNA polymerase II, core complex	4/786	130/184965	0.0024077	0.0456229	0.039901	Ibat.Brg_v3.04AG027440/Ibat.Brg_v3.12EG002900/Ibat.Brg_v3.12EG002910/Ibat.Brg_v3.12EG003080	4
GO:0016226	iron-sulfur cluster assembly	4/786	131/184965	0.00247529	0.0460423	0.0402678	Ibat.Brg_v3.12AG008990/Ibat.Brg_v3.12BG008260/Ibat.Brg_v3.12FG007950/Ibat.Brg_v3.15AG018520	4
GO:0031163	metallo-sulfur cluster assembly	4/786	131/184965	0.00247529	0.0460423	0.0402678	Ibat.Brg_v3.12AG008990/Ibat.Brg_v3.12BG008260/Ibat.Brg_v3.12FG007950/Ibat.Brg_v3.15AG018520	4
GO:0005506	iron ion binding	5/786	217/184965	0.00250066	0.0460423	0.0402678	Ibat.Brg_v3.02BG013020/Ibat.Brg_v3.02CG010430/Ibat.Brg_v3.02EG009400/Ibat.Brg_v3.02FG014470/Ibat.Brg_v3.06EG018170	5
GO:2000762	regulation of phenylpropanoid metabolic process	4/786	132/184965	0.00254417	0.0460423	0.0402678	Ibat.Brg_v3.01DG025610/Ibat.Brg_v3.01FG029320/Ibat.Brg_v3.03EG014470/Ibat.Brg_v3.03FG024960	4
GO:0006144	purine nucleobase metabolic process	3/786	64/184965	0.00262662	0.0460423	0.0402678	Ibat.Brg_v3.01EG016190/Ibat.Brg_v3.01FG015460/Ibat.Brg_v3.14EG010660	3
GO:0006767	water-soluble vitamin metabolic process	6/786	319/184965	0.00263171	0.0460423	0.0402678	Ibat.Brg_v3.02BG013020/Ibat.Brg_v3.02CG010430/Ibat.Brg_v3.02EG009400/Ibat.Brg_v3.02FG014470/Ibat.Brg_v3.14AG019520/Ibat.Brg_v3.14CG017330	6
GO:0033397	zeatin metabolic process	2/786	18/184965	0.00263752	0.0460423	0.0402678	Ibat.Brg_v3.05BG019290/Ibat.Brg_v3.12BG004680	2
GO:0033398	zeatin biosynthetic process	2/786	18/184965	0.00263752	0.0460423	0.0402678	Ibat.Brg_v3.05BG019290/Ibat.Brg_v3.12BG004680	2
GO:0033400	trans-zeatin metabolic process	2/786	18/184965	0.00263752	0.0460423	0.0402678	Ibat.Brg_v3.05BG019290/Ibat.Brg_v3.12BG004680	2
GO:0033466	trans-zeatin biosynthetic process	2/786	18/184965	0.00263752	0.0460423	0.0402678	Ibat.Brg_v3.05BG019290/Ibat.Brg_v3.12BG004680	2
GO:0009799	specification of symmetry	3/786	65/184965	0.00274508	0.0471771	0.0412602	Ibat.Brg_v3.07EG006240/Ibat.Brg_v3.10BG006220/Ibat.Brg_v3.15AG009400	3
GO:0009855	determination of bilateral symmetry	3/786	65/184965	0.00274508	0.0471771	0.0412602	Ibat.Brg_v3.07EG006240/Ibat.Brg_v3.10BG006220/Ibat.Brg_v3.15AG009400	3
GO:0001046	core promoter sequence-specific DNA binding	4/786	136/184965	0.00283283	0.0483106	0.0422516	Ibat.Brg_v3.04CG011540/Ibat.Brg_v3.04DG026270/Ibat.Brg_v3.07DG017070/Ibat.Brg_v3.12AG004140	4
GO:0015801	aromatic amino acid transport	3/786	66/184965	0.00286679	0.0485166	0.0424317	Ibat.Brg_v3.05AG023050/Ibat.Brg_v3.12CG001610/Ibat.Brg_v3.12EG000810	3

## Sheet: M1-125T-F_vs_M1-125-F_up
ID	Description	GeneRatio	BgRatio	pvalue	p.adjust	qvalue	geneID	Count
GO:0046462	monoacylglycerol metabolic process	30/1930	137/184965	1.51433e-30	1.93304e-27	1.66178e-27	Ibat.Brg_v3.01AG008590/Ibat.Brg_v3.01AG008600/Ibat.Brg_v3.01AG008900/Ibat.Brg_v3.01AG008920/Ibat.Brg_v3.01BG006800/Ibat.Brg_v3.01BG006810/Ibat.Brg_v3.01BG007260/Ibat.Brg_v3.01BG007280/Ibat.Brg_v3.01BG007290/Ibat.Brg_v3.01BG007320/Ibat.Brg_v3.01BG007340/Ibat.Brg_v3.01BG007350/Ibat.Brg_v3.01BG007370/Ibat.Brg_v3.01BG007380/Ibat.Brg_v3.01CG006220/Ibat.Brg_v3.01CG006240/Ibat.Brg_v3.01CG006250/Ibat.Brg…	30
GO:0052651	monoacylglycerol catabolic process	30/1930	137/184965	1.51433e-30	1.93304e-27	1.66178e-27	Ibat.Brg_v3.01AG008590/Ibat.Brg_v3.01AG008600/Ibat.Brg_v3.01AG008900/Ibat.Brg_v3.01AG008920/Ibat.Brg_v3.01BG006800/Ibat.Brg_v3.01BG006810/Ibat.Brg_v3.01BG007260/Ibat.Brg_v3.01BG007280/Ibat.Brg_v3.01BG007290/Ibat.Brg_v3.01BG007320/Ibat.Brg_v3.01BG007340/Ibat.Brg_v3.01BG007350/Ibat.Brg_v3.01BG007370/Ibat.Brg_v3.01BG007380/Ibat.Brg_v3.01CG006220/Ibat.Brg_v3.01CG006240/Ibat.Brg_v3.01CG006250/Ibat.Brg…	30
GO:0046340	diacylglycerol catabolic process	30/1930	156/184965	9.65263e-29	8.21439e-26	7.06166e-26	Ibat.Brg_v3.01AG008590/Ibat.Brg_v3.01AG008600/Ibat.Brg_v3.01AG008900/Ibat.Brg_v3.01AG008920/Ibat.Brg_v3.01BG006800/Ibat.Brg_v3.01BG006810/Ibat.Brg_v3.01BG007260/Ibat.Brg_v3.01BG007280/Ibat.Brg_v3.01BG007290/Ibat.Brg_v3.01BG007320/Ibat.Brg_v3.01BG007340/Ibat.Brg_v3.01BG007350/Ibat.Brg_v3.01BG007370/Ibat.Brg_v3.01BG007380/Ibat.Brg_v3.01CG006220/Ibat.Brg_v3.01CG006240/Ibat.Brg_v3.01CG006250/Ibat.Brg…	30
GO:0047372	acylglycerol lipase activity	32/1930	203/184965	1.08735e-27	6.94003e-25	5.96613e-25	Ibat.Brg_v3.01AG008590/Ibat.Brg_v3.01AG008600/Ibat.Brg_v3.01AG008900/Ibat.Brg_v3.01AG008920/Ibat.Brg_v3.01BG006800/Ibat.Brg_v3.01BG006810/Ibat.Brg_v3.01BG007260/Ibat.Brg_v3.01BG007280/Ibat.Brg_v3.01BG007290/Ibat.Brg_v3.01BG007320/Ibat.Brg_v3.01BG007340/Ibat.Brg_v3.01BG007350/Ibat.Brg_v3.01BG007370/Ibat.Brg_v3.01BG007380/Ibat.Brg_v3.01CG006220/Ibat.Brg_v3.01CG006240/Ibat.Brg_v3.01CG006250/Ibat.Brg…	32
GO:0046339	diacylglycerol metabolic process	30/1930	178/184965	6.00128e-27	3.06425e-24	2.63424e-24	Ibat.Brg_v3.01AG008590/Ibat.Brg_v3.01AG008600/Ibat.Brg_v3.01AG008900/Ibat.Brg_v3.01AG008920/Ibat.Brg_v3.01BG006800/Ibat.Brg_v3.01BG006810/Ibat.Brg_v3.01BG007260/Ibat.Brg_v3.01BG007280/Ibat.Brg_v3.01BG007290/Ibat.Brg_v3.01BG007320/Ibat.Brg_v3.01BG007340/Ibat.Brg_v3.01BG007350/Ibat.Brg_v3.01BG007370/Ibat.Brg_v3.01BG007380/Ibat.Brg_v3.01CG006220/Ibat.Brg_v3.01CG006240/Ibat.Brg_v3.01CG006250/Ibat.Brg…	30
GO:0019915	lipid storage	32/1930	222/184965	1.98736e-26	8.45621e-24	7.26955e-24	Ibat.Brg_v3.01AG008590/Ibat.Brg_v3.01AG008600/Ibat.Brg_v3.01AG008900/Ibat.Brg_v3.01AG008920/Ibat.Brg_v3.01BG006800/Ibat.Brg_v3.01BG006810/Ibat.Brg_v3.01BG007260/Ibat.Brg_v3.01BG007280/Ibat.Brg_v3.01BG007290/Ibat.Brg_v3.01BG007320/Ibat.Brg_v3.01BG007340/Ibat.Brg_v3.01BG007350/Ibat.Brg_v3.01BG007370/Ibat.Brg_v3.01BG007380/Ibat.Brg_v3.01CG006220/Ibat.Brg_v3.01CG006240/Ibat.Brg_v3.01CG006250/Ibat.Brg…	32
GO:0046503	glycerolipid catabolic process	32/1930	228/184965	4.68874e-26	1.71005e-23	1.47008e-23	Ibat.Brg_v3.01AG008590/Ibat.Brg_v3.01AG008600/Ibat.Brg_v3.01AG008900/Ibat.Brg_v3.01AG008920/Ibat.Brg_v3.01BG006800/Ibat.Brg_v3.01BG006810/Ibat.Brg_v3.01BG007260/Ibat.Brg_v3.01BG007280/Ibat.Brg_v3.01BG007290/Ibat.Brg_v3.01BG007320/Ibat.Brg_v3.01BG007340/Ibat.Brg_v3.01BG007350/Ibat.Brg_v3.01BG007370/Ibat.Brg_v3.01BG007380/Ibat.Brg_v3.01CG006220/Ibat.Brg_v3.01CG006240/Ibat.Brg_v3.01CG006250/Ibat.Brg…	32
GO:0008970	phospholipase A1 activity	31/1930	210/184965	5.66784e-26	1.80875e-23	1.55493e-23	Ibat.Brg_v3.01AG008590/Ibat.Brg_v3.01AG008600/Ibat.Brg_v3.01AG008900/Ibat.Brg_v3.01AG008920/Ibat.Brg_v3.01BG006800/Ibat.Brg_v3.01BG006810/Ibat.Brg_v3.01BG007260/Ibat.Brg_v3.01BG007280/Ibat.Brg_v3.01BG007290/Ibat.Brg_v3.01BG007310/Ibat.Brg_v3.01BG007320/Ibat.Brg_v3.01BG007340/Ibat.Brg_v3.01BG007350/Ibat.Brg_v3.01BG007370/Ibat.Brg_v3.01BG007380/Ibat.Brg_v3.01CG006220/Ibat.Brg_v3.01CG006240/Ibat.Brg…	31
GO:0046461	neutral lipid catabolic process	30/1930	202/184965	2.90462e-25	7.4155e-23	6.37488e-23	Ibat.Brg_v3.01AG008590/Ibat.Brg_v3.01AG008600/Ibat.Brg_v3.01AG008900/Ibat.Brg_v3.01AG008920/Ibat.Brg_v3.01BG006800/Ibat.Brg_v3.01BG006810/Ibat.Brg_v3.01BG007260/Ibat.Brg_v3.01BG007280/Ibat.Brg_v3.01BG007290/Ibat.Brg_v3.01BG007320/Ibat.Brg_v3.01BG007340/Ibat.Brg_v3.01BG007350/Ibat.Brg_v3.01BG007370/Ibat.Brg_v3.01BG007380/Ibat.Brg_v3.01CG006220/Ibat.Brg_v3.01CG006240/Ibat.Brg_v3.01CG006250/Ibat.Brg…	30
GO:0046464	acylglycerol catabolic process	30/1930	202/184965	2.90462e-25	7.4155e-23	6.37488e-23	Ibat.Brg_v3.01AG008590/Ibat.Brg_v3.01AG008600/Ibat.Brg_v3.01AG008900/Ibat.Brg_v3.01AG008920/Ibat.Brg_v3.01BG006800/Ibat.Brg_v3.01BG006810/Ibat.Brg_v3.01BG007260/Ibat.Brg_v3.01BG007280/Ibat.Brg_v3.01BG007290/Ibat.Brg_v3.01BG007320/Ibat.Brg_v3.01BG007340/Ibat.Brg_v3.01BG007350/Ibat.Brg_v3.01BG007370/Ibat.Brg_v3.01BG007380/Ibat.Brg_v3.01CG006220/Ibat.Brg_v3.01CG006240/Ibat.Brg_v3.01CG006250/Ibat.Brg…	30
GO:0010187	negative regulation of seed germination	32/1930	255/184965	1.65568e-24	3.84268e-22	3.30344e-22	Ibat.Brg_v3.01AG008590/Ibat.Brg_v3.01AG008600/Ibat.Brg_v3.01AG008900/Ibat.Brg_v3.01AG008920/Ibat.Brg_v3.01BG006800/Ibat.Brg_v3.01BG006810/Ibat.Brg_v3.01BG007260/Ibat.Brg_v3.01BG007280/Ibat.Brg_v3.01BG007290/Ibat.Brg_v3.01BG007320/Ibat.Brg_v3.01BG007340/Ibat.Brg_v3.01BG007350/Ibat.Brg_v3.01BG007370/Ibat.Brg_v3.01BG007380/Ibat.Brg_v3.01CG006220/Ibat.Brg_v3.01CG006240/Ibat.Brg_v3.01CG006250/Ibat.Brg…	32
GO:0009625	response to insect	33/1930	328/184965	3.73025e-22	7.93612e-20	6.82244e-20	Ibat.Brg_v3.01AG004980/Ibat.Brg_v3.01AG005090/Ibat.Brg_v3.01AG005160/Ibat.Brg_v3.01BG002500/Ibat.Brg_v3.01BG002590/Ibat.Brg_v3.01BG002600/Ibat.Brg_v3.01CG002010/Ibat.Brg_v3.01CG002030/Ibat.Brg_v3.01CG002050/Ibat.Brg_v3.01CG002060/Ibat.Brg_v3.01CG002130/Ibat.Brg_v3.01CG002150/Ibat.Brg_v3.01CG002230/Ibat.Brg_v3.07AG001480/Ibat.Brg_v3.07AG001490/Ibat.Brg_v3.07BG001550/Ibat.Brg_v3.07BG001560/Ibat.Brg…	33
GO:0005372	water transmembrane transporter activity	27/1930	220/184965	1.17714e-20	2.1466e-18	1.84537e-18	Ibat.Brg_v3.02DG004080/Ibat.Brg_v3.02FG004610/Ibat.Brg_v3.03AG034980/Ibat.Brg_v3.03BG030650/Ibat.Brg_v3.03CG030180/Ibat.Brg_v3.03EG021420/Ibat.Brg_v3.03FG031730/Ibat.Brg_v3.04FG035830/Ibat.Brg_v3.06AG018420/Ibat.Brg_v3.06BG001990/Ibat.Brg_v3.06BG015950/Ibat.Brg_v3.06BG016830/Ibat.Brg_v3.06CG004170/Ibat.Brg_v3.06FG015610/Ibat.Brg_v3.07AG018110/Ibat.Brg_v3.07BG017220/Ibat.Brg_v3.07CG018150/Ibat.Brg…	27
GO:0015250	water channel activity	27/1930	220/184965	1.17714e-20	2.1466e-18	1.84537e-18	Ibat.Brg_v3.02DG004080/Ibat.Brg_v3.02FG004610/Ibat.Brg_v3.03AG034980/Ibat.Brg_v3.03BG030650/Ibat.Brg_v3.03CG030180/Ibat.Brg_v3.03EG021420/Ibat.Brg_v3.03FG031730/Ibat.Brg_v3.04FG035830/Ibat.Brg_v3.06AG018420/Ibat.Brg_v3.06BG001990/Ibat.Brg_v3.06BG015950/Ibat.Brg_v3.06BG016830/Ibat.Brg_v3.06CG004170/Ibat.Brg_v3.06FG015610/Ibat.Brg_v3.07AG018110/Ibat.Brg_v3.07BG017220/Ibat.Brg_v3.07CG018150/Ibat.Brg…	27
GO:2000022	regulation of jasmonic acid mediated signaling pathway	28/1930	259/184965	7.29305e-20	1.18361e-17	1.01751e-17	Ibat.Brg_v3.02CG001150/Ibat.Brg_v3.02DG002650/Ibat.Brg_v3.02FG002000/Ibat.Brg_v3.02FG002310/Ibat.Brg_v3.03CG030410/Ibat.Brg_v3.03DG025500/Ibat.Brg_v3.03EG022590/Ibat.Brg_v3.03FG032530/Ibat.Brg_v3.06AG019190/Ibat.Brg_v3.06BG017700/Ibat.Brg_v3.06CG020970/Ibat.Brg_v3.06CG022680/Ibat.Brg_v3.06CG023540/Ibat.Brg_v3.06EG016450/Ibat.Brg_v3.10CG019750/Ibat.Brg_v3.11BG012160/Ibat.Brg_v3.11DG006640/Ibat.Brg…	28
GO:0034002	(R)-limonene synthase activity	19/1930	88/184965	9.27227e-20	1.18361e-17	1.01751e-17	Ibat.Brg_v3.07AG001480/Ibat.Brg_v3.07AG001490/Ibat.Brg_v3.07BG001550/Ibat.Brg_v3.07BG001560/Ibat.Brg_v3.07CG002690/Ibat.Brg_v3.07CG002700/Ibat.Brg_v3.07CG002720/Ibat.Brg_v3.07EG001860/Ibat.Brg_v3.07EG001880/Ibat.Brg_v3.07EG001890/Ibat.Brg_v3.07EG001900/Ibat.Brg_v3.07FG001380/Ibat.Brg_v3.07FG001410/Ibat.Brg_v3.07FG012510/Ibat.Brg_v3.07FG012520/Ibat.Brg_v3.07FG012530/Ibat.Brg_v3.09DG006600/Ibat.Brg…	19
GO:0050550	pinene synthase activity	19/1930	88/184965	9.27227e-20	1.18361e-17	1.01751e-17	Ibat.Brg_v3.07AG001480/Ibat.Brg_v3.07AG001490/Ibat.Brg_v3.07BG001550/Ibat.Brg_v3.07BG001560/Ibat.Brg_v3.07CG002690/Ibat.Brg_v3.07CG002700/Ibat.Brg_v3.07CG002720/Ibat.Brg_v3.07EG001860/Ibat.Brg_v3.07EG001880/Ibat.Brg_v3.07EG001890/Ibat.Brg_v3.07EG001900/Ibat.Brg_v3.07FG001380/Ibat.Brg_v3.07FG001410/Ibat.Brg_v3.07FG012510/Ibat.Brg_v3.07FG012520/Ibat.Brg_v3.07FG012530/Ibat.Brg_v3.09DG006600/Ibat.Brg…	19
GO:0050552	(4S)-limonene synthase activity	19/1930	88/184965	9.27227e-20	1.18361e-17	1.01751e-17	Ibat.Brg_v3.07AG001480/Ibat.Brg_v3.07AG001490/Ibat.Brg_v3.07BG001550/Ibat.Brg_v3.07BG001560/Ibat.Brg_v3.07CG002690/Ibat.Brg_v3.07CG002700/Ibat.Brg_v3.07CG002720/Ibat.Brg_v3.07EG001860/Ibat.Brg_v3.07EG001880/Ibat.Brg_v3.07EG001890/Ibat.Brg_v3.07EG001900/Ibat.Brg_v3.07FG001380/Ibat.Brg_v3.07FG001410/Ibat.Brg_v3.07FG012510/Ibat.Brg_v3.07FG012520/Ibat.Brg_v3.07FG012530/Ibat.Brg_v3.09DG006600/Ibat.Brg…	19
GO:0052578	alpha-farnesene synthase activity	19/1930	88/184965	9.27227e-20	1.18361e-17	1.01751e-17	Ibat.Brg_v3.07AG001480/Ibat.Brg_v3.07AG001490/Ibat.Brg_v3.07BG001550/Ibat.Brg_v3.07BG001560/Ibat.Brg_v3.07CG002690/Ibat.Brg_v3.07CG002700/Ibat.Brg_v3.07CG002720/Ibat.Brg_v3.07EG001860/Ibat.Brg_v3.07EG001880/Ibat.Brg_v3.07EG001890/Ibat.Brg_v3.07EG001900/Ibat.Brg_v3.07FG001380/Ibat.Brg_v3.07FG001410/Ibat.Brg_v3.07FG012510/Ibat.Brg_v3.07FG012520/Ibat.Brg_v3.07FG012530/Ibat.Brg_v3.09DG006600/Ibat.Brg…	19
GO:0080015	sabinene synthase activity	19/1930	88/184965	9.27227e-20	1.18361e-17	1.01751e-17	Ibat.Brg_v3.07AG001480/Ibat.Brg_v3.07AG001490/Ibat.Brg_v3.07BG001550/Ibat.Brg_v3.07BG001560/Ibat.Brg_v3.07CG002690/Ibat.Brg_v3.07CG002700/Ibat.Brg_v3.07CG002720/Ibat.Brg_v3.07EG001860/Ibat.Brg_v3.07EG001880/Ibat.Brg_v3.07EG001890/Ibat.Brg_v3.07EG001900/Ibat.Brg_v3.07FG001380/Ibat.Brg_v3.07FG001410/Ibat.Brg_v3.07FG012510/Ibat.Brg_v3.07FG012520/Ibat.Brg_v3.07FG012530/Ibat.Brg_v3.09DG006600/Ibat.Brg…	19
GO:0016098	monoterpenoid metabolic process	19/1930	91/184965	1.83374e-19	1.95064e-17	1.6769e-17	Ibat.Brg_v3.07AG001480/Ibat.Brg_v3.07AG001490/Ibat.Brg_v3.07BG001550/Ibat.Brg_v3.07BG001560/Ibat.Brg_v3.07CG002690/Ibat.Brg_v3.07CG002700/Ibat.Brg_v3.07CG002720/Ibat.Brg_v3.07EG001860/Ibat.Brg_v3.07EG001880/Ibat.Brg_v3.07EG001890/Ibat.Brg_v3.07EG001900/Ibat.Brg_v3.07FG001380/Ibat.Brg_v3.07FG001410/Ibat.Brg_v3.07FG012510/Ibat.Brg_v3.07FG012520/Ibat.Brg_v3.07FG012530/Ibat.Brg_v3.09DG006600/Ibat.Brg…	19
GO:0016099	monoterpenoid biosynthetic process	19/1930	91/184965	1.83374e-19	1.95064e-17	1.6769e-17	Ibat.Brg_v3.07AG001480/Ibat.Brg_v3.07AG001490/Ibat.Brg_v3.07BG001550/Ibat.Brg_v3.07BG001560/Ibat.Brg_v3.07CG002690/Ibat.Brg_v3.07CG002700/Ibat.Brg_v3.07CG002720/Ibat.Brg_v3.07EG001860/Ibat.Brg_v3.07EG001880/Ibat.Brg_v3.07EG001890/Ibat.Brg_v3.07EG001900/Ibat.Brg_v3.07FG001380/Ibat.Brg_v3.07FG001410/Ibat.Brg_v3.07FG012510/Ibat.Brg_v3.07FG012520/Ibat.Brg_v3.07FG012530/Ibat.Brg_v3.09DG006600/Ibat.Brg…	19
GO:0034768	(E)-beta-ocimene synthase activity	19/1930	91/184965	1.83374e-19	1.95064e-17	1.6769e-17	Ibat.Brg_v3.07AG001480/Ibat.Brg_v3.07AG001490/Ibat.Brg_v3.07BG001550/Ibat.Brg_v3.07BG001560/Ibat.Brg_v3.07CG002690/Ibat.Brg_v3.07CG002700/Ibat.Brg_v3.07CG002720/Ibat.Brg_v3.07EG001860/Ibat.Brg_v3.07EG001880/Ibat.Brg_v3.07EG001890/Ibat.Brg_v3.07EG001900/Ibat.Brg_v3.07FG001380/Ibat.Brg_v3.07FG001410/Ibat.Brg_v3.07FG012510/Ibat.Brg_v3.07FG012520/Ibat.Brg_v3.07FG012530/Ibat.Brg_v3.09DG006600/Ibat.Brg…	19
GO:0050551	myrcene synthase activity	19/1930	91/184965	1.83374e-19	1.95064e-17	1.6769e-17	Ibat.Brg_v3.07AG001480/Ibat.Brg_v3.07AG001490/Ibat.Brg_v3.07BG001550/Ibat.Brg_v3.07BG001560/Ibat.Brg_v3.07CG002690/Ibat.Brg_v3.07CG002700/Ibat.Brg_v3.07CG002720/Ibat.Brg_v3.07EG001860/Ibat.Brg_v3.07EG001880/Ibat.Brg_v3.07EG001890/Ibat.Brg_v3.07EG001900/Ibat.Brg_v3.07FG001380/Ibat.Brg_v3.07FG001410/Ibat.Brg_v3.07FG012510/Ibat.Brg_v3.07FG012520/Ibat.Brg_v3.07FG012530/Ibat.Brg_v3.09DG006600/Ibat.Brg…	19
GO:0051235	maintenance of location	34/1930	466/184965	2.21277e-18	2.25968e-16	1.94258e-16	Ibat.Brg_v3.01AG008590/Ibat.Brg_v3.01AG008600/Ibat.Brg_v3.01AG008900/Ibat.Brg_v3.01AG008920/Ibat.Brg_v3.01BG006800/Ibat.Brg_v3.01BG006810/Ibat.Brg_v3.01BG007260/Ibat.Brg_v3.01BG007280/Ibat.Brg_v3.01BG007290/Ibat.Brg_v3.01BG007320/Ibat.Brg_v3.01BG007340/Ibat.Brg_v3.01BG007350/Ibat.Brg_v3.01BG007370/Ibat.Brg_v3.01BG007380/Ibat.Brg_v3.01CG006220/Ibat.Brg_v3.01CG006240/Ibat.Brg_v3.01CG006250/Ibat.Brg…	34
GO:0006638	neutral lipid metabolic process	31/1930	398/184965	1.08889e-17	1.0296e-15	8.85119e-16	Ibat.Brg_v3.01AG008590/Ibat.Brg_v3.01AG008600/Ibat.Brg_v3.01AG008900/Ibat.Brg_v3.01AG008920/Ibat.Brg_v3.01BG006800/Ibat.Brg_v3.01BG006810/Ibat.Brg_v3.01BG007260/Ibat.Brg_v3.01BG007280/Ibat.Brg_v3.01BG007290/Ibat.Brg_v3.01BG007320/Ibat.Brg_v3.01BG007340/Ibat.Brg_v3.01BG007350/Ibat.Brg_v3.01BG007370/Ibat.Brg_v3.01BG007380/Ibat.Brg_v3.01CG006220/Ibat.Brg_v3.01CG006240/Ibat.Brg_v3.01CG006250/Ibat.Brg…	31
GO:0006639	acylglycerol metabolic process	31/1930	398/184965	1.08889e-17	1.0296e-15	8.85119e-16	Ibat.Brg_v3.01AG008590/Ibat.Brg_v3.01AG008600/Ibat.Brg_v3.01AG008900/Ibat.Brg_v3.01AG008920/Ibat.Brg_v3.01BG006800/Ibat.Brg_v3.01BG006810/Ibat.Brg_v3.01BG007260/Ibat.Brg_v3.01BG007280/Ibat.Brg_v3.01BG007290/Ibat.Brg_v3.01BG007320/Ibat.Brg_v3.01BG007340/Ibat.Brg_v3.01BG007350/Ibat.Brg_v3.01BG007370/Ibat.Brg_v3.01BG007380/Ibat.Brg_v3.01CG006220/Ibat.Brg_v3.01CG006240/Ibat.Brg_v3.01CG006250/Ibat.Brg…	31
GO:0006833	water transport	27/1930	370/184965	6.59356e-15	5.80461e-13	4.99005e-13	Ibat.Brg_v3.02DG004080/Ibat.Brg_v3.02FG004610/Ibat.Brg_v3.03AG034980/Ibat.Brg_v3.03BG030650/Ibat.Brg_v3.03CG030180/Ibat.Brg_v3.03EG021420/Ibat.Brg_v3.03FG031730/Ibat.Brg_v3.04FG035830/Ibat.Brg_v3.06AG018420/Ibat.Brg_v3.06BG001990/Ibat.Brg_v3.06BG015950/Ibat.Brg_v3.06BG016830/Ibat.Brg_v3.06CG004170/Ibat.Brg_v3.06FG015610/Ibat.Brg_v3.07AG018110/Ibat.Brg_v3.07BG017220/Ibat.Brg_v3.07CG018150/Ibat.Brg…	27
GO:0042044	fluid transport	27/1930	370/184965	6.59356e-15	5.80461e-13	4.99005e-13	Ibat.Brg_v3.02DG004080/Ibat.Brg_v3.02FG004610/Ibat.Brg_v3.03AG034980/Ibat.Brg_v3.03BG030650/Ibat.Brg_v3.03CG030180/Ibat.Brg_v3.03EG021420/Ibat.Brg_v3.03FG031730/Ibat.Brg_v3.04FG035830/Ibat.Brg_v3.06AG018420/Ibat.Brg_v3.06BG001990/Ibat.Brg_v3.06BG015950/Ibat.Brg_v3.06BG016830/Ibat.Brg_v3.06CG004170/Ibat.Brg_v3.06FG015610/Ibat.Brg_v3.07AG018110/Ibat.Brg_v3.07BG017220/Ibat.Brg_v3.07CG018150/Ibat.Brg…	27
GO:0043692	monoterpene metabolic process	20/1930	200/184965	5.79832e-14	4.7752e-12	4.1051e-12	Ibat.Brg_v3.06AG017070/Ibat.Brg_v3.07AG001480/Ibat.Brg_v3.07AG001490/Ibat.Brg_v3.07BG001550/Ibat.Brg_v3.07BG001560/Ibat.Brg_v3.07CG002690/Ibat.Brg_v3.07CG002700/Ibat.Brg_v3.07CG002720/Ibat.Brg_v3.07EG001860/Ibat.Brg_v3.07EG001880/Ibat.Brg_v3.07EG001890/Ibat.Brg_v3.07EG001900/Ibat.Brg_v3.07FG001380/Ibat.Brg_v3.07FG001410/Ibat.Brg_v3.07FG012510/Ibat.Brg_v3.07FG012520/Ibat.Brg_v3.07FG012530/Ibat.Brg…	20
GO:0043693	monoterpene biosynthetic process	20/1930	200/184965	5.79832e-14	4.7752e-12	4.1051e-12	Ibat.Brg_v3.06AG017070/Ibat.Brg_v3.07AG001480/Ibat.Brg_v3.07AG001490/Ibat.Brg_v3.07BG001550/Ibat.Brg_v3.07BG001560/Ibat.Brg_v3.07CG002690/Ibat.Brg_v3.07CG002700/Ibat.Brg_v3.07CG002720/Ibat.Brg_v3.07EG001860/Ibat.Brg_v3.07EG001880/Ibat.Brg_v3.07EG001890/Ibat.Brg_v3.07EG001900/Ibat.Brg_v3.07FG001380/Ibat.Brg_v3.07FG001410/Ibat.Brg_v3.07FG012510/Ibat.Brg_v3.07FG012520/Ibat.Brg_v3.07FG012530/Ibat.Brg…	20
GO:0030414	peptidase inhibitor activity	23/1930	322/184965	9.9996e-13	7.9778e-11	6.85828e-11	Ibat.Brg_v3.01AG004980/Ibat.Brg_v3.01AG005090/Ibat.Brg_v3.01AG005160/Ibat.Brg_v3.01BG002500/Ibat.Brg_v3.01BG002590/Ibat.Brg_v3.01BG002600/Ibat.Brg_v3.01CG002010/Ibat.Brg_v3.01CG002030/Ibat.Brg_v3.01CG002050/Ibat.Brg_v3.01CG002060/Ibat.Brg_v3.01CG002130/Ibat.Brg_v3.01CG002150/Ibat.Brg_v3.01CG002230/Ibat.Brg_v3.04BG012580/Ibat.Brg_v3.05CG023780/Ibat.Brg_v3.07AG001510/Ibat.Brg_v3.07BG001580/Ibat.Brg…	23
GO:0003714	transcription corepressor activity	19/1930	218/184965	2.8628e-12	2.21477e-10	1.90397e-10	Ibat.Brg_v3.02CG001150/Ibat.Brg_v3.02DG002650/Ibat.Brg_v3.02FG002000/Ibat.Brg_v3.02FG002310/Ibat.Brg_v3.06AG019190/Ibat.Brg_v3.06BG017700/Ibat.Brg_v3.06CG020970/Ibat.Brg_v3.06CG022680/Ibat.Brg_v3.06CG023540/Ibat.Brg_v3.06EG016450/Ibat.Brg_v3.10CG019750/Ibat.Brg_v3.11BG012160/Ibat.Brg_v3.11DG006640/Ibat.Brg_v3.11DG007550/Ibat.Brg_v3.11EG006200/Ibat.Brg_v3.13AG019190/Ibat.Brg_v3.13BG014770/Ibat.Brg…	19
GO:0004866	endopeptidase inhibitor activity	22/1930	309/184965	3.28938e-12	2.46994e-10	2.12333e-10	Ibat.Brg_v3.01AG004980/Ibat.Brg_v3.01AG005090/Ibat.Brg_v3.01AG005160/Ibat.Brg_v3.01BG002500/Ibat.Brg_v3.01BG002590/Ibat.Brg_v3.01BG002600/Ibat.Brg_v3.01CG002010/Ibat.Brg_v3.01CG002030/Ibat.Brg_v3.01CG002050/Ibat.Brg_v3.01CG002060/Ibat.Brg_v3.01CG002130/Ibat.Brg_v3.01CG002150/Ibat.Brg_v3.01CG002230/Ibat.Brg_v3.05CG023780/Ibat.Brg_v3.07AG001510/Ibat.Brg_v3.07BG001580/Ibat.Brg_v3.07BG003030/Ibat.Brg…	22
GO:0061134	peptidase regulator activity	23/1930	345/184965	4.11352e-12	3.00052e-10	2.57946e-10	Ibat.Brg_v3.01AG004980/Ibat.Brg_v3.01AG005090/Ibat.Brg_v3.01AG005160/Ibat.Brg_v3.01BG002500/Ibat.Brg_v3.01BG002590/Ibat.Brg_v3.01BG002600/Ibat.Brg_v3.01CG002010/Ibat.Brg_v3.01CG002030/Ibat.Brg_v3.01CG002050/Ibat.Brg_v3.01CG002060/Ibat.Brg_v3.01CG002130/Ibat.Brg_v3.01CG002150/Ibat.Brg_v3.01CG002230/Ibat.Brg_v3.04BG012580/Ibat.Brg_v3.05CG023780/Ibat.Brg_v3.07AG001510/Ibat.Brg_v3.07BG001580/Ibat.Brg…	23
GO:0061135	endopeptidase regulator activity	22/1930	317/184965	5.44034e-12	3.85811e-10	3.3167e-10	Ibat.Brg_v3.01AG004980/Ibat.Brg_v3.01AG005090/Ibat.Brg_v3.01AG005160/Ibat.Brg_v3.01BG002500/Ibat.Brg_v3.01BG002590/Ibat.Brg_v3.01BG002600/Ibat.Brg_v3.01CG002010/Ibat.Brg_v3.01CG002030/Ibat.Brg_v3.01CG002050/Ibat.Brg_v3.01CG002060/Ibat.Brg_v3.01CG002130/Ibat.Brg_v3.01CG002150/Ibat.Brg_v3.01CG002230/Ibat.Brg_v3.05CG023780/Ibat.Brg_v3.07AG001510/Ibat.Brg_v3.07BG001580/Ibat.Brg_v3.07BG003030/Ibat.Brg…	22
GO:0010466	negative regulation of peptidase activity	23/1930	351/184965	5.83949e-12	4.02925e-10	3.46382e-10	Ibat.Brg_v3.01AG004980/Ibat.Brg_v3.01AG005090/Ibat.Brg_v3.01AG005160/Ibat.Brg_v3.01BG002500/Ibat.Brg_v3.01BG002590/Ibat.Brg_v3.01BG002600/Ibat.Brg_v3.01CG002010/Ibat.Brg_v3.01CG002030/Ibat.Brg_v3.01CG002050/Ibat.Brg_v3.01CG002060/Ibat.Brg_v3.01CG002130/Ibat.Brg_v3.01CG002150/Ibat.Brg_v3.01CG002230/Ibat.Brg_v3.04BG012580/Ibat.Brg_v3.05CG023780/Ibat.Brg_v3.07AG001510/Ibat.Brg_v3.07BG001580/Ibat.Brg…	23
GO:0080027	response to herbivore	19/1930	241/184965	1.66243e-11	1.11689e-09	9.60159e-10	Ibat.Brg_v3.07AG001480/Ibat.Brg_v3.07AG001490/Ibat.Brg_v3.07BG001550/Ibat.Brg_v3.07BG001560/Ibat.Brg_v3.07CG002690/Ibat.Brg_v3.07CG002700/Ibat.Brg_v3.07CG002720/Ibat.Brg_v3.07EG001860/Ibat.Brg_v3.07EG001880/Ibat.Brg_v3.07EG001890/Ibat.Brg_v3.07EG001900/Ibat.Brg_v3.07FG001380/Ibat.Brg_v3.07FG001410/Ibat.Brg_v3.07FG012510/Ibat.Brg_v3.07FG012520/Ibat.Brg_v3.07FG012530/Ibat.Brg_v3.09DG006600/Ibat.Brg…	19
GO:0010951	negative regulation of endopeptidase activity	22/1930	338/184965	1.90135e-11	1.24465e-09	1.06999e-09	Ibat.Brg_v3.01AG004980/Ibat.Brg_v3.01AG005090/Ibat.Brg_v3.01AG005160/Ibat.Brg_v3.01BG002500/Ibat.Brg_v3.01BG002590/Ibat.Brg_v3.01BG002600/Ibat.Brg_v3.01CG002010/Ibat.Brg_v3.01CG002030/Ibat.Brg_v3.01CG002050/Ibat.Brg_v3.01CG002060/Ibat.Brg_v3.01CG002130/Ibat.Brg_v3.01CG002150/Ibat.Brg_v3.01CG002230/Ibat.Brg_v3.05CG023780/Ibat.Brg_v3.07AG001510/Ibat.Brg_v3.07BG001580/Ibat.Brg_v3.07BG003030/Ibat.Brg…	22
GO:0051289	protein homotetramerization	17/1930	195/184965	3.92859e-11	2.50742e-09	2.15556e-09	Ibat.Brg_v3.03AG034980/Ibat.Brg_v3.03CG030180/Ibat.Brg_v3.12AG018940/Ibat.Brg_v3.12AG026080/Ibat.Brg_v3.12BG017390/Ibat.Brg_v3.12BG024170/Ibat.Brg_v3.12CG019960/Ibat.Brg_v3.12CG027150/Ibat.Brg_v3.12DG018610/Ibat.Brg_v3.12DG023500/Ibat.Brg_v3.12EG016540/Ibat.Brg_v3.12EG022240/Ibat.Brg_v3.12FG016640/Ibat.Brg_v3.12FG023640/Ibat.Brg_v3.13AG003420/Ibat.Brg_v3.13EG004500/Ibat.Brg_v3.13EG022690	17
GO:0052547	regulation of peptidase activity	23/1930	413/184965	1.49325e-10	9.20694e-09	7.91493e-09	Ibat.Brg_v3.01AG004980/Ibat.Brg_v3.01AG005090/Ibat.Brg_v3.01AG005160/Ibat.Brg_v3.01BG002500/Ibat.Brg_v3.01BG002590/Ibat.Brg_v3.01BG002600/Ibat.Brg_v3.01CG002010/Ibat.Brg_v3.01CG002030/Ibat.Brg_v3.01CG002050/Ibat.Brg_v3.01CG002060/Ibat.Brg_v3.01CG002130/Ibat.Brg_v3.01CG002150/Ibat.Brg_v3.01CG002230/Ibat.Brg_v3.04BG012580/Ibat.Brg_v3.05CG023780/Ibat.Brg_v3.07AG001510/Ibat.Brg_v3.07BG001580/Ibat.Brg…	23
GO:0016106	sesquiterpenoid biosynthetic process	20/1930	307/184965	1.51465e-10	9.20694e-09	7.91493e-09	Ibat.Brg_v3.03CG009530/Ibat.Brg_v3.07AG001480/Ibat.Brg_v3.07AG001490/Ibat.Brg_v3.07BG001550/Ibat.Brg_v3.07BG001560/Ibat.Brg_v3.07CG002690/Ibat.Brg_v3.07CG002700/Ibat.Brg_v3.07CG002720/Ibat.Brg_v3.07EG001860/Ibat.Brg_v3.07EG001880/Ibat.Brg_v3.07EG001890/Ibat.Brg_v3.07EG001900/Ibat.Brg_v3.07FG001380/Ibat.Brg_v3.07FG001410/Ibat.Brg_v3.07FG012510/Ibat.Brg_v3.07FG012520/Ibat.Brg_v3.07FG012530/Ibat.Brg…	20
GO:0046622	positive regulation of organ growth	8/1930	26/184965	1.8314e-10	1.08734e-08	9.34752e-09	Ibat.Brg_v3.01CG027000/Ibat.Brg_v3.01EG031640/Ibat.Brg_v3.01FG025190/Ibat.Brg_v3.09AG031830/Ibat.Brg_v3.09BG031210/Ibat.Brg_v3.09DG031910/Ibat.Brg_v3.09FG029760/Ibat.Brg_v3.09FG029960	8
GO:0052548	regulation of endopeptidase activity	22/1930	388/184965	2.64791e-10	1.53639e-08	1.32079e-08	Ibat.Brg_v3.01AG004980/Ibat.Brg_v3.01AG005090/Ibat.Brg_v3.01AG005160/Ibat.Brg_v3.01BG002500/Ibat.Brg_v3.01BG002590/Ibat.Brg_v3.01BG002600/Ibat.Brg_v3.01CG002010/Ibat.Brg_v3.01CG002030/Ibat.Brg_v3.01CG002050/Ibat.Brg_v3.01CG002060/Ibat.Brg_v3.01CG002130/Ibat.Brg_v3.01CG002150/Ibat.Brg_v3.01CG002230/Ibat.Brg_v3.05CG023780/Ibat.Brg_v3.07AG001510/Ibat.Brg_v3.07BG001580/Ibat.Brg_v3.07BG003030/Ibat.Brg…	22
GO:0051260	protein homooligomerization	24/1930	465/184965	2.79571e-10	1.5861e-08	1.36352e-08	Ibat.Brg_v3.03AG034980/Ibat.Brg_v3.03CG030180/Ibat.Brg_v3.06FG004230/Ibat.Brg_v3.07BG012550/Ibat.Brg_v3.08AG002890/Ibat.Brg_v3.12AG018940/Ibat.Brg_v3.12AG026080/Ibat.Brg_v3.12BG017390/Ibat.Brg_v3.12BG024170/Ibat.Brg_v3.12CG019960/Ibat.Brg_v3.12CG027150/Ibat.Brg_v3.12DG018610/Ibat.Brg_v3.12DG023500/Ibat.Brg_v3.12EG016540/Ibat.Brg_v3.12EG022240/Ibat.Brg_v3.12FG016640/Ibat.Brg_v3.12FG023640/Ibat.Brg…	24
GO:0042807	central vacuole	11/1930	78/184965	6.37238e-10	3.53667e-08	3.04037e-08	Ibat.Brg_v3.03BG030650/Ibat.Brg_v3.03EG021420/Ibat.Brg_v3.03FG031730/Ibat.Brg_v3.04FG035830/Ibat.Brg_v3.06AG018420/Ibat.Brg_v3.06BG015950/Ibat.Brg_v3.06BG016830/Ibat.Brg_v3.06FG015610/Ibat.Brg_v3.07BG017220/Ibat.Brg_v3.07CG019290/Ibat.Brg_v3.07FG020320	11
GO:0045861	negative regulation of proteolysis	23/1930	448/184965	7.21449e-10	3.91885e-08	3.36892e-08	Ibat.Brg_v3.01AG004980/Ibat.Brg_v3.01AG005090/Ibat.Brg_v3.01AG005160/Ibat.Brg_v3.01BG002500/Ibat.Brg_v3.01BG002590/Ibat.Brg_v3.01BG002600/Ibat.Brg_v3.01CG002010/Ibat.Brg_v3.01CG002030/Ibat.Brg_v3.01CG002050/Ibat.Brg_v3.01CG002060/Ibat.Brg_v3.01CG002130/Ibat.Brg_v3.01CG002150/Ibat.Brg_v3.01CG002230/Ibat.Brg_v3.04BG012580/Ibat.Brg_v3.05CG023780/Ibat.Brg_v3.07AG001510/Ibat.Brg_v3.07BG001580/Ibat.Brg…	23
GO:0046246	terpene biosynthetic process	24/1930	493/184965	8.93196e-10	4.75069e-08	4.08402e-08	Ibat.Brg_v3.06AG017070/Ibat.Brg_v3.07AG001480/Ibat.Brg_v3.07AG001490/Ibat.Brg_v3.07BG001550/Ibat.Brg_v3.07BG001560/Ibat.Brg_v3.07CG002690/Ibat.Brg_v3.07CG002700/Ibat.Brg_v3.07CG002720/Ibat.Brg_v3.07EG001860/Ibat.Brg_v3.07EG001880/Ibat.Brg_v3.07EG001890/Ibat.Brg_v3.07EG001900/Ibat.Brg_v3.07FG001380/Ibat.Brg_v3.07FG001410/Ibat.Brg_v3.07FG012510/Ibat.Brg_v3.07FG012520/Ibat.Brg_v3.07FG012530/Ibat.Brg…	24
GO:0035265	organ growth	10/1930	62/184965	9.82673e-10	5.11993e-08	4.40144e-08	Ibat.Brg_v3.01CG027000/Ibat.Brg_v3.01EG031640/Ibat.Brg_v3.01FG025190/Ibat.Brg_v3.09AG031830/Ibat.Brg_v3.09BG031210/Ibat.Brg_v3.09DG031910/Ibat.Brg_v3.09FG029760/Ibat.Brg_v3.09FG029960/Ibat.Brg_v3.12BG011800/Ibat.Brg_v3.12CG012560	10
GO:0009068	aspartate family amino acid catabolic process	6/1930	14/184965	3.58032e-09	1.82811e-07	1.57157e-07	Ibat.Brg_v3.12AG018940/Ibat.Brg_v3.12BG017390/Ibat.Brg_v3.12CG019960/Ibat.Brg_v3.12DG018610/Ibat.Brg_v3.12EG016540/Ibat.Brg_v3.12FG016640	6
GO:0120091	jasmonic acid hydrolase	8/1930	37/184965	4.08777e-09	2.04629e-07	1.75913e-07	Ibat.Brg_v3.03CG030410/Ibat.Brg_v3.03DG025500/Ibat.Brg_v3.03EG022590/Ibat.Brg_v3.03FG032530/Ibat.Brg_v3.12AG026280/Ibat.Brg_v3.12CG027450/Ibat.Brg_v3.12EG022480/Ibat.Brg_v3.12FG023840	8
GO:0004123	cystathionine gamma-lyase activity	6/1930	15/184965	5.91407e-09	2.7452e-07	2.35997e-07	Ibat.Brg_v3.12AG018940/Ibat.Brg_v3.12BG017390/Ibat.Brg_v3.12CG019960/Ibat.Brg_v3.12DG018610/Ibat.Brg_v3.12EG016540/Ibat.Brg_v3.12FG016640	6
GO:0019343	cysteine biosynthetic process via cystathionine	6/1930	15/184965	5.91407e-09	2.7452e-07	2.35997e-07	Ibat.Brg_v3.12AG018940/Ibat.Brg_v3.12BG017390/Ibat.Brg_v3.12CG019960/Ibat.Brg_v3.12DG018610/Ibat.Brg_v3.12EG016540/Ibat.Brg_v3.12FG016640	6
GO:0019346	transsulfuration	6/1930	15/184965	5.91407e-09	2.7452e-07	2.35997e-07	Ibat.Brg_v3.12AG018940/Ibat.Brg_v3.12BG017390/Ibat.Brg_v3.12CG019960/Ibat.Brg_v3.12DG018610/Ibat.Brg_v3.12EG016540/Ibat.Brg_v3.12FG016640	6
GO:0071266	'de novo' L-methionine biosynthetic process	6/1930	15/184965	5.91407e-09	2.7452e-07	2.35997e-07	Ibat.Brg_v3.12AG018940/Ibat.Brg_v3.12BG017390/Ibat.Brg_v3.12CG019960/Ibat.Brg_v3.12DG018610/Ibat.Brg_v3.12EG016540/Ibat.Brg_v3.12FG016640	6
GO:1900067	regulation of cellular response to alkaline pH	6/1930	16/184965	9.37828e-09	4.27549e-07	3.67551e-07	Ibat.Brg_v3.06AG019190/Ibat.Brg_v3.06BG017700/Ibat.Brg_v3.06CG020970/Ibat.Brg_v3.06CG022680/Ibat.Brg_v3.06CG023540/Ibat.Brg_v3.06EG016450	6
GO:0016841	ammonia-lyase activity	9/1930	59/184965	1.13213e-08	5.07075e-07	4.35917e-07	Ibat.Brg_v3.01BG018000/Ibat.Brg_v3.01EG010310/Ibat.Brg_v3.01FG012170/Ibat.Brg_v3.09AG017060/Ibat.Brg_v3.09CG014480/Ibat.Brg_v3.09DG016910/Ibat.Brg_v3.09EG016430/Ibat.Brg_v3.13AG003420/Ibat.Brg_v3.13EG004500	9
GO:0009825	multidimensional cell growth	21/1930	438/184965	1.27501e-08	5.61224e-07	4.82467e-07	Ibat.Brg_v3.01BG035930/Ibat.Brg_v3.01CG027000/Ibat.Brg_v3.01CG028810/Ibat.Brg_v3.01EG028630/Ibat.Brg_v3.01EG031640/Ibat.Brg_v3.01EG033410/Ibat.Brg_v3.01EG034310/Ibat.Brg_v3.01FG025190/Ibat.Brg_v3.01FG026970/Ibat.Brg_v3.06AG026700/Ibat.Brg_v3.06BG025780/Ibat.Brg_v3.06DG022900/Ibat.Brg_v3.06EG023710/Ibat.Brg_v3.07BG020860/Ibat.Brg_v3.07FG023370/Ibat.Brg_v3.09AG031830/Ibat.Brg_v3.09BG031210/Ibat.Brg…	21
GO:0009975	cyclase activity	19/1930	367/184965	1.84235e-08	7.97205e-07	6.85333e-07	Ibat.Brg_v3.07AG001480/Ibat.Brg_v3.07AG001490/Ibat.Brg_v3.07BG001550/Ibat.Brg_v3.07BG001560/Ibat.Brg_v3.07CG002690/Ibat.Brg_v3.07CG002700/Ibat.Brg_v3.07CG002720/Ibat.Brg_v3.07EG001860/Ibat.Brg_v3.07EG001880/Ibat.Brg_v3.07EG001890/Ibat.Brg_v3.07EG001900/Ibat.Brg_v3.07FG001380/Ibat.Brg_v3.07FG001410/Ibat.Brg_v3.07FG012510/Ibat.Brg_v3.07FG012520/Ibat.Brg_v3.07FG012530/Ibat.Brg_v3.09DG006600/Ibat.Brg…	19
GO:0010330	cellulose synthase complex	9/1930	66/184965	3.12371e-08	1.32914e-06	1.14262e-06	Ibat.Brg_v3.01BG035930/Ibat.Brg_v3.01CG028810/Ibat.Brg_v3.01EG033410/Ibat.Brg_v3.01EG034310/Ibat.Brg_v3.01FG026970/Ibat.Brg_v3.06AG026700/Ibat.Brg_v3.06BG025780/Ibat.Brg_v3.06DG022900/Ibat.Brg_v3.06EG023710	9
GO:0002238	response to molecule of fungal origin	13/1930	169/184965	3.40856e-08	1.42657e-06	1.22638e-06	Ibat.Brg_v3.01AG004980/Ibat.Brg_v3.01AG005090/Ibat.Brg_v3.01AG005160/Ibat.Brg_v3.01BG002500/Ibat.Brg_v3.01BG002590/Ibat.Brg_v3.01BG002600/Ibat.Brg_v3.01CG002010/Ibat.Brg_v3.01CG002030/Ibat.Brg_v3.01CG002050/Ibat.Brg_v3.01CG002060/Ibat.Brg_v3.01CG002130/Ibat.Brg_v3.01CG002150/Ibat.Brg_v3.01CG002230	13
GO:0034059	response to anoxia	12/1930	141/184965	3.72549e-08	1.51656e-06	1.30374e-06	Ibat.Brg_v3.04AG024180/Ibat.Brg_v3.04EG030250/Ibat.Brg_v3.04EG030800/Ibat.Brg_v3.06BG027260/Ibat.Brg_v3.06DG024270/Ibat.Brg_v3.09AG011010/Ibat.Brg_v3.09DG010850/Ibat.Brg_v3.09EG009680/Ibat.Brg_v3.15AG006030/Ibat.Brg_v3.15CG007870/Ibat.Brg_v3.15DG007230/Ibat.Brg_v3.15FG009380	12
GO:0051761	sesquiterpene metabolic process	20/1930	425/184965	3.80179e-08	1.51656e-06	1.30374e-06	Ibat.Brg_v3.07AG001480/Ibat.Brg_v3.07AG001490/Ibat.Brg_v3.07BG001550/Ibat.Brg_v3.07BG001560/Ibat.Brg_v3.07CG002690/Ibat.Brg_v3.07CG002700/Ibat.Brg_v3.07CG002720/Ibat.Brg_v3.07EG001860/Ibat.Brg_v3.07EG001880/Ibat.Brg_v3.07EG001890/Ibat.Brg_v3.07EG001900/Ibat.Brg_v3.07FG001380/Ibat.Brg_v3.07FG001410/Ibat.Brg_v3.07FG012510/Ibat.Brg_v3.07FG012520/Ibat.Brg_v3.07FG012530/Ibat.Brg_v3.09DG006600/Ibat.Brg…	20
GO:0051762	sesquiterpene biosynthetic process	20/1930	425/184965	3.80179e-08	1.51656e-06	1.30374e-06	Ibat.Brg_v3.07AG001480/Ibat.Brg_v3.07AG001490/Ibat.Brg_v3.07BG001550/Ibat.Brg_v3.07BG001560/Ibat.Brg_v3.07CG002690/Ibat.Brg_v3.07CG002700/Ibat.Brg_v3.07CG002720/Ibat.Brg_v3.07EG001860/Ibat.Brg_v3.07EG001880/Ibat.Brg_v3.07EG001890/Ibat.Brg_v3.07EG001900/Ibat.Brg_v3.07FG001380/Ibat.Brg_v3.07FG001410/Ibat.Brg_v3.07FG012510/Ibat.Brg_v3.07FG012520/Ibat.Brg_v3.07FG012530/Ibat.Brg_v3.09DG006600/Ibat.Brg…	20
GO:0010334	sesquiterpene synthase activity	20/1930	426/184965	3.95018e-08	1.55151e-06	1.33379e-06	Ibat.Brg_v3.07AG001480/Ibat.Brg_v3.07AG001490/Ibat.Brg_v3.07BG001550/Ibat.Brg_v3.07BG001560/Ibat.Brg_v3.07CG002690/Ibat.Brg_v3.07CG002700/Ibat.Brg_v3.07CG002720/Ibat.Brg_v3.07EG001860/Ibat.Brg_v3.07EG001880/Ibat.Brg_v3.07EG001890/Ibat.Brg_v3.07EG001900/Ibat.Brg_v3.07FG001380/Ibat.Brg_v3.07FG001410/Ibat.Brg_v3.07FG012510/Ibat.Brg_v3.07FG012520/Ibat.Brg_v3.07FG012530/Ibat.Brg_v3.09DG006600/Ibat.Brg…	20
GO:0006714	sesquiterpenoid metabolic process	21/1930	469/184965	4.0852e-08	1.58023e-06	1.35847e-06	Ibat.Brg_v3.03CG009530/Ibat.Brg_v3.06BG020380/Ibat.Brg_v3.07AG001480/Ibat.Brg_v3.07AG001490/Ibat.Brg_v3.07BG001550/Ibat.Brg_v3.07BG001560/Ibat.Brg_v3.07CG002690/Ibat.Brg_v3.07CG002700/Ibat.Brg_v3.07CG002720/Ibat.Brg_v3.07EG001860/Ibat.Brg_v3.07EG001880/Ibat.Brg_v3.07EG001890/Ibat.Brg_v3.07EG001900/Ibat.Brg_v3.07FG001380/Ibat.Brg_v3.07FG001410/Ibat.Brg_v3.07FG012510/Ibat.Brg_v3.07FG012520/Ibat.Brg…	21
GO:0003962	cystathionine gamma-synthase activity	6/1930	20/184965	4.37983e-08	1.66891e-06	1.43471e-06	Ibat.Brg_v3.12AG018940/Ibat.Brg_v3.12BG017390/Ibat.Brg_v3.12CG019960/Ibat.Brg_v3.12DG018610/Ibat.Brg_v3.12EG016540/Ibat.Brg_v3.12FG016640	6
GO:0010333	terpene synthase activity	20/1930	433/184965	5.14796e-08	1.93276e-06	1.66153e-06	Ibat.Brg_v3.07AG001480/Ibat.Brg_v3.07AG001490/Ibat.Brg_v3.07BG001550/Ibat.Brg_v3.07BG001560/Ibat.Brg_v3.07CG002690/Ibat.Brg_v3.07CG002700/Ibat.Brg_v3.07CG002720/Ibat.Brg_v3.07EG001860/Ibat.Brg_v3.07EG001880/Ibat.Brg_v3.07EG001890/Ibat.Brg_v3.07EG001900/Ibat.Brg_v3.07FG001380/Ibat.Brg_v3.07FG001410/Ibat.Brg_v3.07FG012510/Ibat.Brg_v3.07FG012520/Ibat.Brg_v3.07FG012530/Ibat.Brg_v3.09DG006600/Ibat.Brg…	20
GO:0080170	hydrogen peroxide transmembrane transport	7/1930	34/184965	5.60249e-08	2.07292e-06	1.78203e-06	Ibat.Brg_v3.02DG004080/Ibat.Brg_v3.02FG004610/Ibat.Brg_v3.06CG004170/Ibat.Brg_v3.07AG018110/Ibat.Brg_v3.07CG018150/Ibat.Brg_v3.07DG019710/Ibat.Brg_v3.07FG019450	7
GO:0000098	sulfur amino acid catabolic process	7/1930	36/184965	8.53668e-08	3.11345e-06	2.67654e-06	Ibat.Brg_v3.12AG018940/Ibat.Brg_v3.12BG017390/Ibat.Brg_v3.12CG019960/Ibat.Brg_v3.12DG018610/Ibat.Brg_v3.12EG016540/Ibat.Brg_v3.12FG016640/Ibat.Brg_v3.S063830	7
GO:0016838	carbon-oxygen lyase activity, acting on phosphates	21/1930	494/184965	9.73798e-08	3.50156e-06	3.01018e-06	Ibat.Brg_v3.05CG020750/Ibat.Brg_v3.07AG001480/Ibat.Brg_v3.07AG001490/Ibat.Brg_v3.07BG001550/Ibat.Brg_v3.07BG001560/Ibat.Brg_v3.07CG002690/Ibat.Brg_v3.07CG002700/Ibat.Brg_v3.07CG002720/Ibat.Brg_v3.07EG001860/Ibat.Brg_v3.07EG001880/Ibat.Brg_v3.07EG001890/Ibat.Brg_v3.07EG001900/Ibat.Brg_v3.07FG001380/Ibat.Brg_v3.07FG001410/Ibat.Brg_v3.07FG012510/Ibat.Brg_v3.07FG012520/Ibat.Brg_v3.07FG012530/Ibat.Brg…	21
GO:0080037	negative regulation of cytokinin-activated signaling pathway	6/1930	23/184965	1.11053e-07	3.93776e-06	3.38517e-06	Ibat.Brg_v3.02BG029740/Ibat.Brg_v3.02BG030470/Ibat.Brg_v3.02BG030620/Ibat.Brg_v3.02CG028650/Ibat.Brg_v3.02EG026270/Ibat.Brg_v3.02FG028860	6
GO:0009866	induced systemic resistance, ethylene mediated signaling pathway	9/1930	77/184965	1.22856e-07	4.29659e-06	3.69365e-06	Ibat.Brg_v3.02BG030120/Ibat.Brg_v3.02CG029000/Ibat.Brg_v3.09AG019830/Ibat.Brg_v3.09BG017300/Ibat.Brg_v3.09BG017320/Ibat.Brg_v3.09CG017320/Ibat.Brg_v3.09CG017370/Ibat.Brg_v3.09EG018900/Ibat.Brg_v3.09FG019840	9
GO:0051262	protein tetramerization	18/1930	376/184965	1.38854e-07	4.79046e-06	4.11822e-06	Ibat.Brg_v3.02AG002450/Ibat.Brg_v3.03AG034980/Ibat.Brg_v3.03CG030180/Ibat.Brg_v3.12AG018940/Ibat.Brg_v3.12AG026080/Ibat.Brg_v3.12BG017390/Ibat.Brg_v3.12BG024170/Ibat.Brg_v3.12CG019960/Ibat.Brg_v3.12CG027150/Ibat.Brg_v3.12DG018610/Ibat.Brg_v3.12DG023500/Ibat.Brg_v3.12EG016540/Ibat.Brg_v3.12EG022240/Ibat.Brg_v3.12FG016640/Ibat.Brg_v3.12FG023640/Ibat.Brg_v3.13AG003420/Ibat.Brg_v3.13EG004500/Ibat.Brg…	18
GO:0009063	cellular amino acid catabolic process	16/1930	299/184965	1.52755e-07	5.19979e-06	4.4701e-06	Ibat.Brg_v3.01BG018000/Ibat.Brg_v3.01EG010310/Ibat.Brg_v3.01FG012170/Ibat.Brg_v3.04AG002940/Ibat.Brg_v3.04BG002490/Ibat.Brg_v3.04CG002080/Ibat.Brg_v3.04EG002560/Ibat.Brg_v3.04EG008370/Ibat.Brg_v3.04FG003900/Ibat.Brg_v3.12AG018940/Ibat.Brg_v3.12BG017390/Ibat.Brg_v3.12CG019960/Ibat.Brg_v3.12DG018610/Ibat.Brg_v3.12EG016540/Ibat.Brg_v3.12FG016640/Ibat.Brg_v3.S063830	16
GO:0016813	hydrolase activity, acting on carbon-nitrogen (but not peptide) bonds, in linear amidines	7/1930	41/184965	2.19685e-07	7.26978e-06	6.24961e-06	Ibat.Brg_v3.02BG020350/Ibat.Brg_v3.04AG002940/Ibat.Brg_v3.04BG002490/Ibat.Brg_v3.04CG002080/Ibat.Brg_v3.04EG002560/Ibat.Brg_v3.04FG003900/Ibat.Brg_v3.09AG030590	7
GO:0004053	arginase activity	5/1930	14/184965	2.27803e-07	7.26978e-06	6.24961e-06	Ibat.Brg_v3.04AG002940/Ibat.Brg_v3.04BG002490/Ibat.Brg_v3.04CG002080/Ibat.Brg_v3.04EG002560/Ibat.Brg_v3.04FG003900	5
GO:0008783	agmatinase activity	5/1930	14/184965	2.27803e-07	7.26978e-06	6.24961e-06	Ibat.Brg_v3.04AG002940/Ibat.Brg_v3.04BG002490/Ibat.Brg_v3.04CG002080/Ibat.Brg_v3.04EG002560/Ibat.Brg_v3.04FG003900	5
GO:0033388	putrescine biosynthetic process from arginine	5/1930	14/184965	2.27803e-07	7.26978e-06	6.24961e-06	Ibat.Brg_v3.04AG002940/Ibat.Brg_v3.04BG002490/Ibat.Brg_v3.04CG002080/Ibat.Brg_v3.04EG002560/Ibat.Brg_v3.04FG003900	5
GO:0033389	putrescine biosynthetic process from arginine, using agmatinase	5/1930	14/184965	2.27803e-07	7.26978e-06	6.24961e-06	Ibat.Brg_v3.04AG002940/Ibat.Brg_v3.04BG002490/Ibat.Brg_v3.04CG002080/Ibat.Brg_v3.04EG002560/Ibat.Brg_v3.04FG003900	5
GO:1901606	alpha-amino acid catabolic process	15/1930	274/184965	2.76675e-07	8.72037e-06	7.49664e-06	Ibat.Brg_v3.01BG018000/Ibat.Brg_v3.01EG010310/Ibat.Brg_v3.01FG012170/Ibat.Brg_v3.04AG002940/Ibat.Brg_v3.04BG002490/Ibat.Brg_v3.04CG002080/Ibat.Brg_v3.04EG002560/Ibat.Brg_v3.04EG008370/Ibat.Brg_v3.04FG003900/Ibat.Brg_v3.12AG018940/Ibat.Brg_v3.12BG017390/Ibat.Brg_v3.12CG019960/Ibat.Brg_v3.12DG018610/Ibat.Brg_v3.12EG016540/Ibat.Brg_v3.12FG016640	15
GO:0002237	response to molecule of bacterial origin	17/1930	368/184965	5.01429e-07	1.56116e-05	1.34208e-05	Ibat.Brg_v3.01AG004980/Ibat.Brg_v3.01AG005090/Ibat.Brg_v3.01AG005160/Ibat.Brg_v3.01BG002500/Ibat.Brg_v3.01BG002590/Ibat.Brg_v3.01BG002600/Ibat.Brg_v3.01CG002010/Ibat.Brg_v3.01CG002030/Ibat.Brg_v3.01CG002050/Ibat.Brg_v3.01CG002060/Ibat.Brg_v3.01CG002130/Ibat.Brg_v3.01CG002150/Ibat.Brg_v3.01CG002230/Ibat.Brg_v3.02AG020730/Ibat.Brg_v3.02BG027290/Ibat.Brg_v3.13AG003420/Ibat.Brg_v3.13EG004500	17
GO:0046898	response to cycloheximide	10/1930	118/184965	5.25505e-07	1.6164e-05	1.38957e-05	Ibat.Brg_v3.03AG033410/Ibat.Brg_v3.03DG023540/Ibat.Brg_v3.03FG031170/Ibat.Brg_v3.09AG017060/Ibat.Brg_v3.09CG014480/Ibat.Brg_v3.09DG016910/Ibat.Brg_v3.09EG016430/Ibat.Brg_v3.12AG024870/Ibat.Brg_v3.12DG022010/Ibat.Brg_v3.12FG022420	10
GO:0048639	positive regulation of developmental growth	10/1930	121/184965	6.63289e-07	2.01593e-05	1.73303e-05	Ibat.Brg_v3.01CG027000/Ibat.Brg_v3.01EG031640/Ibat.Brg_v3.01FG025190/Ibat.Brg_v3.03CG002470/Ibat.Brg_v3.03DG001980/Ibat.Brg_v3.09AG031830/Ibat.Brg_v3.09BG031210/Ibat.Brg_v3.09DG031910/Ibat.Brg_v3.09FG029760/Ibat.Brg_v3.09FG029960	10
GO:0006527	arginine catabolic process	5/1930	19/184965	1.26689e-06	3.80513e-05	3.27115e-05	Ibat.Brg_v3.04AG002940/Ibat.Brg_v3.04BG002490/Ibat.Brg_v3.04CG002080/Ibat.Brg_v3.04EG002560/Ibat.Brg_v3.04FG003900	5
GO:0060992	response to fungicide	10/1930	130/184965	1.28336e-06	3.80979e-05	3.27516e-05	Ibat.Brg_v3.03AG033410/Ibat.Brg_v3.03DG023540/Ibat.Brg_v3.03FG031170/Ibat.Brg_v3.09AG017060/Ibat.Brg_v3.09CG014480/Ibat.Brg_v3.09DG016910/Ibat.Brg_v3.09EG016430/Ibat.Brg_v3.12AG024870/Ibat.Brg_v3.12DG022010/Ibat.Brg_v3.12FG022420	10
GO:0071265	L-methionine biosynthetic process	6/1930	35/184965	1.60442e-06	4.70815e-05	4.04746e-05	Ibat.Brg_v3.12AG018940/Ibat.Brg_v3.12BG017390/Ibat.Brg_v3.12CG019960/Ibat.Brg_v3.12DG018610/Ibat.Brg_v3.12EG016540/Ibat.Brg_v3.12FG016640	6
GO:0006097	glyoxylate cycle	5/1930	21/184965	2.1789e-06	6.32128e-05	5.43421e-05	Ibat.Brg_v3.11AG006100/Ibat.Brg_v3.11BG007140/Ibat.Brg_v3.11CG007480/Ibat.Brg_v3.11DG005000/Ibat.Brg_v3.11EG003760	5
GO:0009070	serine family amino acid biosynthetic process	9/1930	109/184965	2.40988e-06	6.91284e-05	5.94276e-05	Ibat.Brg_v3.12AG018940/Ibat.Brg_v3.12BG017390/Ibat.Brg_v3.12CG019960/Ibat.Brg_v3.12DG018610/Ibat.Brg_v3.12EG016540/Ibat.Brg_v3.12FG016640/Ibat.Brg_v3.13AG003420/Ibat.Brg_v3.13DG022070/Ibat.Brg_v3.13EG004500	9
GO:0019755	one-carbon compound transport	8/1930	82/184965	2.49165e-06	7.06799e-05	6.07614e-05	Ibat.Brg_v3.03BG030650/Ibat.Brg_v3.03EG021420/Ibat.Brg_v3.03FG031730/Ibat.Brg_v3.04FG035830/Ibat.Brg_v3.06AG018420/Ibat.Brg_v3.06BG015950/Ibat.Brg_v3.06BG016830/Ibat.Brg_v3.06FG015610	8
GO:0016840	carbon-nitrogen lyase activity	9/1930	110/184965	2.60033e-06	7.2952e-05	6.27147e-05	Ibat.Brg_v3.01BG018000/Ibat.Brg_v3.01EG010310/Ibat.Brg_v3.01FG012170/Ibat.Brg_v3.09AG017060/Ibat.Brg_v3.09CG014480/Ibat.Brg_v3.09DG016910/Ibat.Brg_v3.09EG016430/Ibat.Brg_v3.13AG003420/Ibat.Brg_v3.13EG004500	9
GO:0009092	homoserine metabolic process	6/1930	38/184965	2.65687e-06	7.37282e-05	6.33819e-05	Ibat.Brg_v3.12AG018940/Ibat.Brg_v3.12BG017390/Ibat.Brg_v3.12CG019960/Ibat.Brg_v3.12DG018610/Ibat.Brg_v3.12EG016540/Ibat.Brg_v3.12FG016640	6
GO:0008519	ammonium transmembrane transporter activity	8/1930	84/184965	2.99213e-06	8.12651e-05	6.98612e-05	Ibat.Brg_v3.04CG008130/Ibat.Brg_v3.04CG008520/Ibat.Brg_v3.04DG009950/Ibat.Brg_v3.06AG018420/Ibat.Brg_v3.06BG015950/Ibat.Brg_v3.06BG016830/Ibat.Brg_v3.06FG015610/Ibat.Brg_v3.11BG009020	8
GO:0072488	ammonium transmembrane transport	8/1930	84/184965	2.99213e-06	8.12651e-05	6.98612e-05	Ibat.Brg_v3.04CG008130/Ibat.Brg_v3.04CG008520/Ibat.Brg_v3.04DG009950/Ibat.Brg_v3.06AG018420/Ibat.Brg_v3.06BG015950/Ibat.Brg_v3.06BG016830/Ibat.Brg_v3.06FG015610/Ibat.Brg_v3.11BG009020	8
GO:1901654	response to ketone	10/1930	147/184965	3.89983e-06	0.000104803	9.00957e-05	Ibat.Brg_v3.03AG033410/Ibat.Brg_v3.03DG023540/Ibat.Brg_v3.03FG031170/Ibat.Brg_v3.09AG017060/Ibat.Brg_v3.09CG014480/Ibat.Brg_v3.09DG016910/Ibat.Brg_v3.09EG016430/Ibat.Brg_v3.12AG024870/Ibat.Brg_v3.12DG022010/Ibat.Brg_v3.12FG022420	10
GO:0050667	homocysteine metabolic process	6/1930	42/184965	4.87197e-06	0.000129564	0.000111382	Ibat.Brg_v3.12AG018940/Ibat.Brg_v3.12BG017390/Ibat.Brg_v3.12CG019960/Ibat.Brg_v3.12DG018610/Ibat.Brg_v3.12EG016540/Ibat.Brg_v3.12FG016640	6
GO:0010930	negative regulation of auxin mediated signaling pathway	7/1930	65/184965	5.47113e-06	0.000143998	0.000123791	Ibat.Brg_v3.09AG019830/Ibat.Brg_v3.09BG017300/Ibat.Brg_v3.09BG017320/Ibat.Brg_v3.09CG017320/Ibat.Brg_v3.09CG017370/Ibat.Brg_v3.09EG018900/Ibat.Brg_v3.09FG019840	7
GO:0019344	cysteine biosynthetic process	7/1930	66/184965	6.06504e-06	0.000157551	0.000135442	Ibat.Brg_v3.12AG018940/Ibat.Brg_v3.12BG017390/Ibat.Brg_v3.12CG019960/Ibat.Brg_v3.12DG018610/Ibat.Brg_v3.12EG016540/Ibat.Brg_v3.12FG016640/Ibat.Brg_v3.13DG022070	7
GO:0015695	organic cation transport	9/1930	122/184965	6.1095e-06	0.000157551	0.000135442	Ibat.Brg_v3.04CG008130/Ibat.Brg_v3.04CG008520/Ibat.Brg_v3.04DG009950/Ibat.Brg_v3.06AG018420/Ibat.Brg_v3.06BG015950/Ibat.Brg_v3.06BG016830/Ibat.Brg_v3.06FG015610/Ibat.Brg_v3.11BG009020/Ibat.Brg_v3.12BG024120	9
GO:0042891	obsolete antibiotic transport	7/1930	67/184965	6.71156e-06	0.000170485	0.000146561	Ibat.Brg_v3.02DG004080/Ibat.Brg_v3.02FG004610/Ibat.Brg_v3.06CG004170/Ibat.Brg_v3.07AG018110/Ibat.Brg_v3.07CG018150/Ibat.Brg_v3.07DG019710/Ibat.Brg_v3.07FG019450	7
GO:0016621	cinnamoyl-CoA reductase activity	5/1930	26/184965	6.74462e-06	0.000170485	0.000146561	Ibat.Brg_v3.11AG010300/Ibat.Brg_v3.11CG012710/Ibat.Brg_v3.11DG009790/Ibat.Brg_v3.11EG008240/Ibat.Brg_v3.11FG010930	5
GO:0030244	cellulose biosynthetic process	14/1930	313/184965	7.14409e-06	0.000178812	0.00015372	Ibat.Brg_v3.01BG035930/Ibat.Brg_v3.01CG028810/Ibat.Brg_v3.01EG033410/Ibat.Brg_v3.01EG034310/Ibat.Brg_v3.01FG026970/Ibat.Brg_v3.06AG026700/Ibat.Brg_v3.06BG025780/Ibat.Brg_v3.06DG022900/Ibat.Brg_v3.06EG023710/Ibat.Brg_v3.12AG025750/Ibat.Brg_v3.12BG023830/Ibat.Brg_v3.12CG026760/Ibat.Brg_v3.12DG023130/Ibat.Brg_v3.12FG023300	14
GO:0005275	amine transmembrane transporter activity	4/1930	14/184965	1.08817e-05	0.000259905	0.000223432	Ibat.Brg_v3.06AG018420/Ibat.Brg_v3.06BG015950/Ibat.Brg_v3.06BG016830/Ibat.Brg_v3.06FG015610	4
GO:0015200	methylammonium transmembrane transporter activity	4/1930	14/184965	1.08817e-05	0.000259905	0.000223432	Ibat.Brg_v3.06AG018420/Ibat.Brg_v3.06BG015950/Ibat.Brg_v3.06BG016830/Ibat.Brg_v3.06FG015610	4
GO:0072489	methylammonium transmembrane transport	4/1930	14/184965	1.08817e-05	0.000259905	0.000223432	Ibat.Brg_v3.06AG018420/Ibat.Brg_v3.06BG015950/Ibat.Brg_v3.06BG016830/Ibat.Brg_v3.06FG015610	4
GO:0030170	pyridoxal phosphate binding	9/1930	131/184965	1.0893e-05	0.000259905	0.000223432	Ibat.Brg_v3.12AG018940/Ibat.Brg_v3.12BG017390/Ibat.Brg_v3.12CG019960/Ibat.Brg_v3.12DG018610/Ibat.Brg_v3.12EG016540/Ibat.Brg_v3.12FG016640/Ibat.Brg_v3.13AG003420/Ibat.Brg_v3.13DG022070/Ibat.Brg_v3.13EG004500	9
GO:0070279	vitamin B6 binding	9/1930	131/184965	1.0893e-05	0.000259905	0.000223432	Ibat.Brg_v3.12AG018940/Ibat.Brg_v3.12BG017390/Ibat.Brg_v3.12CG019960/Ibat.Brg_v3.12DG018610/Ibat.Brg_v3.12EG016540/Ibat.Brg_v3.12FG016640/Ibat.Brg_v3.13AG003420/Ibat.Brg_v3.13DG022070/Ibat.Brg_v3.13EG004500	9
GO:0004475	mannose-1-phosphate guanylyltransferase activity	5/1930	29/184965	1.18639e-05	0.00028045	0.000241095	Ibat.Brg_v3.12AG025750/Ibat.Brg_v3.12BG023830/Ibat.Brg_v3.12CG026760/Ibat.Brg_v3.12DG023130/Ibat.Brg_v3.12FG023300	5
GO:0010088	phloem development	17/1930	468/184965	1.22868e-05	0.000287782	0.000247397	Ibat.Brg_v3.06AG004280/Ibat.Brg_v3.06DG002250/Ibat.Brg_v3.06DG002260/Ibat.Brg_v3.07CG005390/Ibat.Brg_v3.07CG005410/Ibat.Brg_v3.07CG005420/Ibat.Brg_v3.07DG004060/Ibat.Brg_v3.07DG004080/Ibat.Brg_v3.07EG005210/Ibat.Brg_v3.07EG005230/Ibat.Brg_v3.07EG005240/Ibat.Brg_v3.07FG004540/Ibat.Brg_v3.07FG004570/Ibat.Brg_v3.07FG004580/Ibat.Brg_v3.07FG011210/Ibat.Brg_v3.14CG005750/Ibat.Brg_v3.14FG006150	17
GO:0030243	cellulose metabolic process	14/1930	329/184965	1.24983e-05	0.000290074	0.000249368	Ibat.Brg_v3.01BG035930/Ibat.Brg_v3.01CG028810/Ibat.Brg_v3.01EG033410/Ibat.Brg_v3.01EG034310/Ibat.Brg_v3.01FG026970/Ibat.Brg_v3.06AG026700/Ibat.Brg_v3.06BG025780/Ibat.Brg_v3.06DG022900/Ibat.Brg_v3.06EG023710/Ibat.Brg_v3.12AG025750/Ibat.Brg_v3.12BG023830/Ibat.Brg_v3.12CG026760/Ibat.Brg_v3.12DG023130/Ibat.Brg_v3.12FG023300	14
GO:0030761	8-hydroxyquercitin 8-O-methyltransferase activity	7/1930	74/184965	1.30355e-05	0.000299817	0.000257744	Ibat.Brg_v3.02DG007730/Ibat.Brg_v3.02DG007740/Ibat.Brg_v3.02EG005900/Ibat.Brg_v3.02FG008710/Ibat.Brg_v3.06DG004320/Ibat.Brg_v3.06DG004330/Ibat.Brg_v3.06FG003060	7
GO:0051274	beta-glucan biosynthetic process	14/1930	331/184965	1.33701e-05	0.000304766	0.000261998	Ibat.Brg_v3.01BG035930/Ibat.Brg_v3.01CG028810/Ibat.Brg_v3.01EG033410/Ibat.Brg_v3.01EG034310/Ibat.Brg_v3.01FG026970/Ibat.Brg_v3.06AG026700/Ibat.Brg_v3.06BG025780/Ibat.Brg_v3.06DG022900/Ibat.Brg_v3.06EG023710/Ibat.Brg_v3.12AG025750/Ibat.Brg_v3.12BG023830/Ibat.Brg_v3.12CG026760/Ibat.Brg_v3.12DG023130/Ibat.Brg_v3.12FG023300	14
GO:0046487	glyoxylate metabolic process	5/1930	30/184965	1.4114e-05	0.000318876	0.000274128	Ibat.Brg_v3.11AG006100/Ibat.Brg_v3.11BG007140/Ibat.Brg_v3.11CG007480/Ibat.Brg_v3.11DG005000/Ibat.Brg_v3.11EG003760	5
GO:0015696	GO:0015696	8/1930	104/184965	1.4712e-05	0.000329471	0.000283236	Ibat.Brg_v3.04CG008130/Ibat.Brg_v3.04CG008520/Ibat.Brg_v3.04DG009950/Ibat.Brg_v3.06AG018420/Ibat.Brg_v3.06BG015950/Ibat.Brg_v3.06BG016830/Ibat.Brg_v3.06FG015610/Ibat.Brg_v3.11BG009020	8
GO:0009871	jasmonic acid and ethylene-dependent systemic resistance, ethylene mediated signaling pathway	7/1930	77/184965	1.69532e-05	0.000376361	0.000323547	Ibat.Brg_v3.09AG019830/Ibat.Brg_v3.09BG017300/Ibat.Brg_v3.09BG017320/Ibat.Brg_v3.09CG017320/Ibat.Brg_v3.09CG017370/Ibat.Brg_v3.09EG018900/Ibat.Brg_v3.09FG019840	7
GO:0034722	gamma-glutamyl-peptidase activity	4/1930	16/184965	1.94578e-05	0.000428239	0.000368144	Ibat.Brg_v3.02BG011400/Ibat.Brg_v3.02DG009720/Ibat.Brg_v3.02EG007650/Ibat.Brg_v3.02FG010330	4
GO:0042754	negative regulation of circadian rhythm	5/1930	33/184965	2.29037e-05	0.00049977	0.000429637	Ibat.Brg_v3.11AG010300/Ibat.Brg_v3.11CG012710/Ibat.Brg_v3.11DG009790/Ibat.Brg_v3.11EG008240/Ibat.Brg_v3.11FG010930	5
GO:0004708	MAP kinase kinase activity	5/1930	34/184965	2.66213e-05	0.000571129	0.000490982	Ibat.Brg_v3.02BG030120/Ibat.Brg_v3.02CG029000/Ibat.Brg_v3.04AG019460/Ibat.Brg_v3.04DG019550/Ibat.Brg_v3.04EG025610	5
GO:0009961	response to 1-aminocyclopropane-1-carboxylic acid	5/1930	34/184965	2.66213e-05	0.000571129	0.000490982	Ibat.Brg_v3.09DG007060/Ibat.Brg_v3.09EG005920/Ibat.Brg_v3.10BG022630/Ibat.Brg_v3.10CG022020/Ibat.Brg_v3.10FG018530	5
GO:0051290	protein heterotetramerization	8/1930	113/184965	2.69133e-05	0.000572579	0.000492229	Ibat.Brg_v3.03AG034980/Ibat.Brg_v3.03CG030180/Ibat.Brg_v3.12AG026080/Ibat.Brg_v3.12BG024170/Ibat.Brg_v3.12CG027150/Ibat.Brg_v3.12DG023500/Ibat.Brg_v3.12EG022240/Ibat.Brg_v3.12FG023640	8
GO:0019853	L-ascorbic acid biosynthetic process	8/1930	115/184965	3.05438e-05	0.000644448	0.000554013	Ibat.Brg_v3.12AG025750/Ibat.Brg_v3.12BG023830/Ibat.Brg_v3.12CG026760/Ibat.Brg_v3.12DG023130/Ibat.Brg_v3.12FG023300/Ibat.Brg_v3.13BG019920/Ibat.Brg_v3.13CG022640/Ibat.Brg_v3.13EG022110	8
GO:0016165	linoleate 13S-lipoxygenase activity	6/1930	58/184965	3.26112e-05	0.000682429	0.000586664	Ibat.Brg_v3.04AG034630/Ibat.Brg_v3.04DG035460/Ibat.Brg_v3.04EG041220/Ibat.Brg_v3.04FG040220/Ibat.Brg_v3.08FG022570/Ibat.Brg_v3.15CG013840	6
GO:0051722	protein C-terminal methylesterase activity	5/1930	36/184965	3.54493e-05	0.000735789	0.000632536	Ibat.Brg_v3.02BG004000/Ibat.Brg_v3.02CG001390/Ibat.Brg_v3.02DG002890/Ibat.Brg_v3.02EG002570/Ibat.Brg_v3.02FG002600	5
GO:0009970	cellular response to sulfate starvation	6/1930	59/184965	3.59825e-05	0.000740834	0.000636873	Ibat.Brg_v3.12AG018940/Ibat.Brg_v3.12BG017390/Ibat.Brg_v3.12CG019960/Ibat.Brg_v3.12DG018610/Ibat.Brg_v3.12EG016540/Ibat.Brg_v3.12FG016640	6
GO:0019852	L-ascorbic acid metabolic process	8/1930	120/184965	4.14486e-05	0.000830508	0.000713963	Ibat.Brg_v3.12AG025750/Ibat.Brg_v3.12BG023830/Ibat.Brg_v3.12CG026760/Ibat.Brg_v3.12DG023130/Ibat.Brg_v3.12FG023300/Ibat.Brg_v3.13BG019920/Ibat.Brg_v3.13CG022640/Ibat.Brg_v3.13EG022110	8
GO:0044273	sulfur compound catabolic process	8/1930	120/184965	4.14486e-05	0.000830508	0.000713963	Ibat.Brg_v3.06FG015740/Ibat.Brg_v3.12AG018940/Ibat.Brg_v3.12BG017390/Ibat.Brg_v3.12CG019960/Ibat.Brg_v3.12DG018610/Ibat.Brg_v3.12EG016540/Ibat.Brg_v3.12FG016640/Ibat.Brg_v3.S063830	8
GO:0009543	chloroplast thylakoid lumen	10/1930	193/184965	4.16393e-05	0.000830508	0.000713963	Ibat.Brg_v3.01AG019780/Ibat.Brg_v3.01BG026160/Ibat.Brg_v3.01CG021690/Ibat.Brg_v3.01EG019220/Ibat.Brg_v3.01EG020080/Ibat.Brg_v3.01FG018150/Ibat.Brg_v3.11AG000240/Ibat.Brg_v3.11AG003680/Ibat.Brg_v3.11BG003460/Ibat.Brg_v3.11FG003850	10
GO:0031978	plastid thylakoid lumen	10/1930	193/184965	4.16393e-05	0.000830508	0.000713963	Ibat.Brg_v3.01AG019780/Ibat.Brg_v3.01BG026160/Ibat.Brg_v3.01CG021690/Ibat.Brg_v3.01EG019220/Ibat.Brg_v3.01EG020080/Ibat.Brg_v3.01FG018150/Ibat.Brg_v3.11AG000240/Ibat.Brg_v3.11AG003680/Ibat.Brg_v3.11BG003460/Ibat.Brg_v3.11FG003850	10
GO:0008515	sucrose transmembrane transporter activity	6/1930	61/184965	4.35629e-05	0.000862141	0.000741156	Ibat.Brg_v3.06FG022380/Ibat.Brg_v3.08AG002890/Ibat.Brg_v3.13AG010310/Ibat.Brg_v3.13BG006510/Ibat.Brg_v3.13DG010830/Ibat.Brg_v3.13EG012930	6
GO:0001763	morphogenesis of a branching structure	12/1930	278/184965	4.4477e-05	0.00087346	0.000750887	Ibat.Brg_v3.02AG003210/Ibat.Brg_v3.02AG003220/Ibat.Brg_v3.02BG002540/Ibat.Brg_v3.02BG003630/Ibat.Brg_v3.02DG002560/Ibat.Brg_v3.02FG002220/Ibat.Brg_v3.04CG008130/Ibat.Brg_v3.04CG008520/Ibat.Brg_v3.04DG009950/Ibat.Brg_v3.14AG018240/Ibat.Brg_v3.14DG014840/Ibat.Brg_v3.14FG017970	12
GO:0008905	mannose-phosphate guanylyltransferase activity	5/1930	38/184965	4.63899e-05	0.000898299	0.00077224	Ibat.Brg_v3.12AG025750/Ibat.Brg_v3.12BG023830/Ibat.Brg_v3.12CG026760/Ibat.Brg_v3.12DG023130/Ibat.Brg_v3.12FG023300	5
GO:0051273	beta-glucan metabolic process	14/1930	371/184965	4.64455e-05	0.000898299	0.00077224	Ibat.Brg_v3.01BG035930/Ibat.Brg_v3.01CG028810/Ibat.Brg_v3.01EG033410/Ibat.Brg_v3.01EG034310/Ibat.Brg_v3.01FG026970/Ibat.Brg_v3.06AG026700/Ibat.Brg_v3.06BG025780/Ibat.Brg_v3.06DG022900/Ibat.Brg_v3.06EG023710/Ibat.Brg_v3.12AG025750/Ibat.Brg_v3.12BG023830/Ibat.Brg_v3.12CG026760/Ibat.Brg_v3.12DG023130/Ibat.Brg_v3.12FG023300	14
GO:0009627	systemic acquired resistance	16/1930	473/184965	5.09864e-05	0.000978709	0.000841367	Ibat.Brg_v3.01AG005310/Ibat.Brg_v3.01FG002400/Ibat.Brg_v3.04AG019460/Ibat.Brg_v3.04DG019550/Ibat.Brg_v3.04EG025610/Ibat.Brg_v3.06FG015740/Ibat.Brg_v3.08EG007130/Ibat.Brg_v3.08FG008140/Ibat.Brg_v3.09AG019830/Ibat.Brg_v3.09BG017300/Ibat.Brg_v3.09BG017320/Ibat.Brg_v3.09CG017320/Ibat.Brg_v3.09CG017370/Ibat.Brg_v3.09EG018900/Ibat.Brg_v3.09FG019840/Ibat.Brg_v3.11CG001310	16
GO:0010168	ER body	5/1930	40/184965	5.97722e-05	0.00113879	0.000978987	Ibat.Brg_v3.07AG011200/Ibat.Brg_v3.07BG010280/Ibat.Brg_v3.07DG012350/Ibat.Brg_v3.07DG012360/Ibat.Brg_v3.07EG013390	5
GO:0009067	aspartate family amino acid biosynthetic process	8/1930	128/184965	6.55477e-05	0.00122148	0.00105007	Ibat.Brg_v3.06CG023270/Ibat.Brg_v3.12AG018940/Ibat.Brg_v3.12BG017390/Ibat.Brg_v3.12CG019960/Ibat.Brg_v3.12DG018610/Ibat.Brg_v3.12EG016540/Ibat.Brg_v3.12FG016640/Ibat.Brg_v3.S102690	8
GO:0090376	seed trichome differentiation	8/1930	128/184965	6.55477e-05	0.00122148	0.00105007	Ibat.Brg_v3.05AG004890/Ibat.Brg_v3.05BG003940/Ibat.Brg_v3.05DG004080/Ibat.Brg_v3.12AG025630/Ibat.Brg_v3.12BG023720/Ibat.Brg_v3.12CG026660/Ibat.Brg_v3.12DG022990/Ibat.Brg_v3.12FG023190	8
GO:0090378	seed trichome elongation	8/1930	128/184965	6.55477e-05	0.00122148	0.00105007	Ibat.Brg_v3.05AG004890/Ibat.Brg_v3.05BG003940/Ibat.Brg_v3.05DG004080/Ibat.Brg_v3.12AG025630/Ibat.Brg_v3.12BG023720/Ibat.Brg_v3.12CG026660/Ibat.Brg_v3.12DG022990/Ibat.Brg_v3.12FG023190	8
GO:0006534	cysteine metabolic process	7/1930	95/184965	6.62129e-05	0.00122494	0.00105304	Ibat.Brg_v3.12AG018940/Ibat.Brg_v3.12BG017390/Ibat.Brg_v3.12CG019960/Ibat.Brg_v3.12DG018610/Ibat.Brg_v3.12EG016540/Ibat.Brg_v3.12FG016640/Ibat.Brg_v3.13DG022070	7
GO:0009445	putrescine metabolic process	5/1930	41/184965	6.74887e-05	0.0012307	0.001058	Ibat.Brg_v3.04AG002940/Ibat.Brg_v3.04BG002490/Ibat.Brg_v3.04CG002080/Ibat.Brg_v3.04EG002560/Ibat.Brg_v3.04FG003900	5
GO:0009446	putrescine biosynthetic process	5/1930	41/184965	6.74887e-05	0.0012307	0.001058	Ibat.Brg_v3.04AG002940/Ibat.Brg_v3.04BG002490/Ibat.Brg_v3.04CG002080/Ibat.Brg_v3.04EG002560/Ibat.Brg_v3.04FG003900	5
GO:0015837	amine transport	4/1930	22/184965	7.43959e-05	0.00133756	0.00114986	Ibat.Brg_v3.06AG018420/Ibat.Brg_v3.06BG015950/Ibat.Brg_v3.06BG016830/Ibat.Brg_v3.06FG015610	4
GO:0015843	methylammonium transport	4/1930	22/184965	7.43959e-05	0.00133756	0.00114986	Ibat.Brg_v3.06AG018420/Ibat.Brg_v3.06BG015950/Ibat.Brg_v3.06BG016830/Ibat.Brg_v3.06FG015610	4
GO:0015154	disaccharide transmembrane transporter activity	6/1930	68/184965	8.07108e-05	0.00143094	0.00123013	Ibat.Brg_v3.06FG022380/Ibat.Brg_v3.08AG002890/Ibat.Brg_v3.13AG010310/Ibat.Brg_v3.13BG006510/Ibat.Brg_v3.13DG010830/Ibat.Brg_v3.13EG012930	6
GO:0015157	oligosaccharide transmembrane transporter activity	6/1930	68/184965	8.07108e-05	0.00143094	0.00123013	Ibat.Brg_v3.06FG022380/Ibat.Brg_v3.08AG002890/Ibat.Brg_v3.13AG010310/Ibat.Brg_v3.13BG006510/Ibat.Brg_v3.13DG010830/Ibat.Brg_v3.13EG012930	6
GO:2000762	regulation of phenylpropanoid metabolic process	8/1930	132/184965	8.13926e-05	0.00143307	0.00123197	Ibat.Brg_v3.02BG029740/Ibat.Brg_v3.02BG030470/Ibat.Brg_v3.02BG030620/Ibat.Brg_v3.02CG028650/Ibat.Brg_v3.02EG026270/Ibat.Brg_v3.02FG028860/Ibat.Brg_v3.03BG001270/Ibat.Brg_v3.06FG015740	8
GO:0015101	organic cation transmembrane transporter activity	6/1930	71/184965	0.000102843	0.00179835	0.00154599	Ibat.Brg_v3.06AG018420/Ibat.Brg_v3.06BG015950/Ibat.Brg_v3.06BG016830/Ibat.Brg_v3.06FG015610/Ibat.Brg_v3.11BG009020/Ibat.Brg_v3.12BG024120	6
GO:0019236	response to pheromone	3/1930	10/184965	0.000128856	0.00214757	0.0018462	Ibat.Brg_v3.14AG019840/Ibat.Brg_v3.14DG017470/Ibat.Brg_v3.14DG018330	3
GO:0031137	regulation of conjugation with cellular fusion	3/1930	10/184965	0.000128856	0.00214757	0.0018462	Ibat.Brg_v3.14AG019840/Ibat.Brg_v3.14DG017470/Ibat.Brg_v3.14DG018330	3
GO:0034306	regulation of sexual sporulation	3/1930	10/184965	0.000128856	0.00214757	0.0018462	Ibat.Brg_v3.14AG019840/Ibat.Brg_v3.14DG017470/Ibat.Brg_v3.14DG018330	3
GO:0034307	regulation of ascospore formation	3/1930	10/184965	0.000128856	0.00214757	0.0018462	Ibat.Brg_v3.14AG019840/Ibat.Brg_v3.14DG017470/Ibat.Brg_v3.14DG018330	3
GO:0043940	regulation of sexual sporulation resulting in formation of a cellular spore	3/1930	10/184965	0.000128856	0.00214757	0.0018462	Ibat.Brg_v3.14AG019840/Ibat.Brg_v3.14DG017470/Ibat.Brg_v3.14DG018330	3
GO:0046999	regulation of conjugation	3/1930	10/184965	0.000128856	0.00214757	0.0018462	Ibat.Brg_v3.14AG019840/Ibat.Brg_v3.14DG017470/Ibat.Brg_v3.14DG018330	3
GO:0071444	cellular response to pheromone	3/1930	10/184965	0.000128856	0.00214757	0.0018462	Ibat.Brg_v3.14AG019840/Ibat.Brg_v3.14DG017470/Ibat.Brg_v3.14DG018330	3
GO:0015770	sucrose transport	6/1930	74/184965	0.000129544	0.00214757	0.0018462	Ibat.Brg_v3.06FG022380/Ibat.Brg_v3.08AG002890/Ibat.Brg_v3.13AG010310/Ibat.Brg_v3.13BG006510/Ibat.Brg_v3.13DG010830/Ibat.Brg_v3.13EG012930	6
GO:0004869	cysteine-type endopeptidase inhibitor activity	9/1930	184/184965	0.00015412	0.0025385	0.00218227	Ibat.Brg_v3.05CG023780/Ibat.Brg_v3.07AG001510/Ibat.Brg_v3.07BG001580/Ibat.Brg_v3.07BG003030/Ibat.Brg_v3.07DG001010/Ibat.Brg_v3.07EG001920/Ibat.Brg_v3.07EG001930/Ibat.Brg_v3.07FG001420/Ibat.Brg_v3.07FG001430	9
GO:0051181	obsolete cofactor transport	8/1930	145/184965	0.000156301	0.00255793	0.00219898	Ibat.Brg_v3.02DG004080/Ibat.Brg_v3.02FG004610/Ibat.Brg_v3.06CG004170/Ibat.Brg_v3.07AG018110/Ibat.Brg_v3.07CG018150/Ibat.Brg_v3.07DG019710/Ibat.Brg_v3.07FG019450/Ibat.Brg_v3.12BG024120	8
GO:0009065	glutamine family amino acid catabolic process	5/1930	49/184965	0.000160281	0.00260636	0.00224061	Ibat.Brg_v3.04AG002940/Ibat.Brg_v3.04BG002490/Ibat.Brg_v3.04CG002080/Ibat.Brg_v3.04EG002560/Ibat.Brg_v3.04FG003900	5
GO:0016759	cellulose synthase activity	9/1930	188/184965	0.000181037	0.00288867	0.0024833	Ibat.Brg_v3.01BG035930/Ibat.Brg_v3.01CG028810/Ibat.Brg_v3.01EG033410/Ibat.Brg_v3.01EG034310/Ibat.Brg_v3.01FG026970/Ibat.Brg_v3.06AG026700/Ibat.Brg_v3.06BG025780/Ibat.Brg_v3.06DG022900/Ibat.Brg_v3.06EG023710	9
GO:0019842	vitamin binding	9/1930	188/184965	0.000181037	0.00288867	0.0024833	Ibat.Brg_v3.12AG018940/Ibat.Brg_v3.12BG017390/Ibat.Brg_v3.12CG019960/Ibat.Brg_v3.12DG018610/Ibat.Brg_v3.12EG016540/Ibat.Brg_v3.12FG016640/Ibat.Brg_v3.13AG003420/Ibat.Brg_v3.13DG022070/Ibat.Brg_v3.13EG004500	9
GO:2000117	negative regulation of cysteine-type endopeptidase activity	9/1930	188/184965	0.000181037	0.00288867	0.0024833	Ibat.Brg_v3.05CG023780/Ibat.Brg_v3.07AG001510/Ibat.Brg_v3.07BG001580/Ibat.Brg_v3.07BG003030/Ibat.Brg_v3.07DG001010/Ibat.Brg_v3.07EG001920/Ibat.Brg_v3.07EG001930/Ibat.Brg_v3.07FG001420/Ibat.Brg_v3.07FG001430	9
GO:0009833	plant-type primary cell wall biogenesis	9/1930	190/184965	0.000195897	0.00310636	0.00267044	Ibat.Brg_v3.01BG035930/Ibat.Brg_v3.01CG028810/Ibat.Brg_v3.01EG033410/Ibat.Brg_v3.01EG034310/Ibat.Brg_v3.01FG026970/Ibat.Brg_v3.06AG026700/Ibat.Brg_v3.06BG025780/Ibat.Brg_v3.06DG022900/Ibat.Brg_v3.06EG023710	9
GO:0051723	protein methylesterase activity	5/1930	52/184965	0.000212883	0.0033211	0.00285505	Ibat.Brg_v3.02BG004000/Ibat.Brg_v3.02CG001390/Ibat.Brg_v3.02DG002890/Ibat.Brg_v3.02EG002570/Ibat.Brg_v3.02FG002600	5
GO:0015766	disaccharide transport	6/1930	81/184965	0.000213341	0.0033211	0.00285505	Ibat.Brg_v3.06FG022380/Ibat.Brg_v3.08AG002890/Ibat.Brg_v3.13AG010310/Ibat.Brg_v3.13BG006510/Ibat.Brg_v3.13DG010830/Ibat.Brg_v3.13EG012930	6
GO:0015772	oligosaccharide transport	6/1930	81/184965	0.000213341	0.0033211	0.00285505	Ibat.Brg_v3.06FG022380/Ibat.Brg_v3.08AG002890/Ibat.Brg_v3.13AG010310/Ibat.Brg_v3.13BG006510/Ibat.Brg_v3.13DG010830/Ibat.Brg_v3.13EG012930	6
GO:0008242	omega peptidase activity	4/1930	29/184965	0.000227916	0.00350524	0.00301335	Ibat.Brg_v3.02BG011400/Ibat.Brg_v3.02DG009720/Ibat.Brg_v3.02EG007650/Ibat.Brg_v3.02FG010330	4
GO:0046900	tetrahydrofolylpolyglutamate metabolic process	4/1930	29/184965	0.000227916	0.00350524	0.00301335	Ibat.Brg_v3.02BG011400/Ibat.Brg_v3.02DG009720/Ibat.Brg_v3.02EG007650/Ibat.Brg_v3.02FG010330	4
GO:0005790	smooth endoplasmic reticulum	3/1930	12/184965	0.000232574	0.00355545	0.00305651	Ibat.Brg_v3.01BG018000/Ibat.Brg_v3.01EG010310/Ibat.Brg_v3.01FG012170	3
GO:0004252	serine-type endopeptidase activity	12/1930	332/184965	0.000233966	0.00355545	0.00305651	Ibat.Brg_v3.02AG003210/Ibat.Brg_v3.02AG003220/Ibat.Brg_v3.02BG002540/Ibat.Brg_v3.02BG003630/Ibat.Brg_v3.02DG002560/Ibat.Brg_v3.02FG002220/Ibat.Brg_v3.06AG022380/Ibat.Brg_v3.06EG018580/Ibat.Brg_v3.10FG010600/Ibat.Brg_v3.14AG018240/Ibat.Brg_v3.14DG014840/Ibat.Brg_v3.14FG017970	12
GO:0043406	positive regulation of MAP kinase activity	8/1930	160/184965	0.000305318	0.00461228	0.00396504	Ibat.Brg_v3.02BG030120/Ibat.Brg_v3.02CG029000/Ibat.Brg_v3.04AG019460/Ibat.Brg_v3.04DG019550/Ibat.Brg_v3.04EG025610/Ibat.Brg_v3.14AG019840/Ibat.Brg_v3.14DG017470/Ibat.Brg_v3.14DG018330	8
GO:0051291	protein heterooligomerization	8/1930	165/184965	0.000375217	0.00563488	0.00484414	Ibat.Brg_v3.03AG034980/Ibat.Brg_v3.03CG030180/Ibat.Brg_v3.12AG026080/Ibat.Brg_v3.12BG024170/Ibat.Brg_v3.12CG027150/Ibat.Brg_v3.12DG023500/Ibat.Brg_v3.12EG022240/Ibat.Brg_v3.12FG023640	8
GO:0000187	obsolete activation of MAPK activity	5/1930	59/184965	0.000386122	0.00573122	0.00492695	Ibat.Brg_v3.02BG030120/Ibat.Brg_v3.02CG029000/Ibat.Brg_v3.04AG019460/Ibat.Brg_v3.04DG019550/Ibat.Brg_v3.04EG025610	5
GO:0006560	proline metabolic process	5/1930	59/184965	0.000386122	0.00573122	0.00492695	Ibat.Brg_v3.04AG002940/Ibat.Brg_v3.04BG002490/Ibat.Brg_v3.04CG002080/Ibat.Brg_v3.04EG002560/Ibat.Brg_v3.04FG003900	5
GO:0010507	negative regulation of autophagy	5/1930	61/184965	0.000451019	0.0066558	0.00572179	Ibat.Brg_v3.07AG011200/Ibat.Brg_v3.07BG010280/Ibat.Brg_v3.07DG012350/Ibat.Brg_v3.07DG012360/Ibat.Brg_v3.07EG013390	5
GO:0009861	jasmonic acid and ethylene-dependent systemic resistance	11/1930	308/184965	0.000463248	0.00679697	0.00584315	Ibat.Brg_v3.09AG019830/Ibat.Brg_v3.09BG017300/Ibat.Brg_v3.09BG017320/Ibat.Brg_v3.09CG017320/Ibat.Brg_v3.09CG017370/Ibat.Brg_v3.09EG018900/Ibat.Brg_v3.09FG019840/Ibat.Brg_v3.11CG001310/Ibat.Brg_v3.11EG009700/Ibat.Brg_v3.11EG009740/Ibat.Brg_v3.12BG024110	11
GO:0009086	methionine biosynthetic process	6/1930	95/184965	0.000505008	0.00736735	0.00633349	Ibat.Brg_v3.12AG018940/Ibat.Brg_v3.12BG017390/Ibat.Brg_v3.12CG019960/Ibat.Brg_v3.12DG018610/Ibat.Brg_v3.12EG016540/Ibat.Brg_v3.12FG016640	6
GO:0009069	serine family amino acid metabolic process	9/1930	217/184965	0.00051766	0.00750901	0.00645527	Ibat.Brg_v3.12AG018940/Ibat.Brg_v3.12BG017390/Ibat.Brg_v3.12CG019960/Ibat.Brg_v3.12DG018610/Ibat.Brg_v3.12EG016540/Ibat.Brg_v3.12FG016640/Ibat.Brg_v3.13AG003420/Ibat.Brg_v3.13DG022070/Ibat.Brg_v3.13EG004500	9
GO:0045548	phenylalanine ammonia-lyase activity	4/1930	36/184965	0.000533417	0.00769387	0.00661418	Ibat.Brg_v3.09AG017060/Ibat.Brg_v3.09CG014480/Ibat.Brg_v3.09DG016910/Ibat.Brg_v3.09EG016430	4
GO:0006591	ornithine metabolic process	5/1930	64/184965	0.000563341	0.00807982	0.00694598	Ibat.Brg_v3.04AG002940/Ibat.Brg_v3.04BG002490/Ibat.Brg_v3.04CG002080/Ibat.Brg_v3.04EG002560/Ibat.Brg_v3.04FG003900	5
GO:0070492	oligosaccharide binding	3/1930	16/184965	0.000573818	0.00818412	0.00703564	Ibat.Brg_v3.01AG023050/Ibat.Brg_v3.01CG024510/Ibat.Brg_v3.08AG016480	3
GO:0043622	cortical microtubule organization	12/1930	370/184965	0.00061353	0.00870189	0.00748076	Ibat.Brg_v3.01BG035930/Ibat.Brg_v3.01CG028810/Ibat.Brg_v3.01EG033410/Ibat.Brg_v3.01EG034310/Ibat.Brg_v3.01FG026970/Ibat.Brg_v3.02EG021880/Ibat.Brg_v3.06AG026700/Ibat.Brg_v3.06BG025780/Ibat.Brg_v3.06DG022900/Ibat.Brg_v3.06EG023710/Ibat.Brg_v3.11CG001310/Ibat.Brg_v3.14EG024130	12
GO:0006525	arginine metabolic process	6/1930	99/184965	0.000628592	0.00886628	0.00762207	Ibat.Brg_v3.04AG002940/Ibat.Brg_v3.04BG002490/Ibat.Brg_v3.04CG002080/Ibat.Brg_v3.04EG002560/Ibat.Brg_v3.04FG003900/Ibat.Brg_v3.12FG028190	6
GO:2000116	regulation of cysteine-type endopeptidase activity	9/1930	230/184965	0.000783121	0.0109852	0.00944365	Ibat.Brg_v3.05CG023780/Ibat.Brg_v3.07AG001510/Ibat.Brg_v3.07BG001580/Ibat.Brg_v3.07BG003030/Ibat.Brg_v3.07DG001010/Ibat.Brg_v3.07EG001920/Ibat.Brg_v3.07EG001930/Ibat.Brg_v3.07FG001420/Ibat.Brg_v3.07FG001430	9
GO:0004420	hydroxymethylglutaryl-CoA reductase (NADPH) activity	5/1930	69/184965	0.000795523	0.0110982	0.00954078	Ibat.Brg_v3.12BG011320/Ibat.Brg_v3.12CG012190/Ibat.Brg_v3.12CG012200/Ibat.Brg_v3.12FG009710/Ibat.Brg_v3.12FG009720	5
GO:0000025	maltose catabolic process	3/1930	18/184965	0.000823212	0.0112992	0.00971362	Ibat.Brg_v3.09AG012700/Ibat.Brg_v3.09BG011990/Ibat.Brg_v3.15EG006570	3
GO:0004134	4-alpha-glucanotransferase activity	3/1930	18/184965	0.000823212	0.0112992	0.00971362	Ibat.Brg_v3.09AG012700/Ibat.Brg_v3.09BG011990/Ibat.Brg_v3.15EG006570	3
GO:0080181	lateral root branching	3/1930	18/184965	0.000823212	0.0112992	0.00971362	Ibat.Brg_v3.04CG008130/Ibat.Brg_v3.04CG008520/Ibat.Brg_v3.04DG009950	3
GO:0016598	protein arginylation	4/1930	41/184965	0.000879937	0.0120133	0.0103274	Ibat.Brg_v3.09AG017060/Ibat.Brg_v3.09CG014480/Ibat.Brg_v3.09DG016910/Ibat.Brg_v3.09EG016430	4
GO:0000097	sulfur amino acid biosynthetic process	7/1930	146/184965	0.000919062	0.0124807	0.0107293	Ibat.Brg_v3.12AG018940/Ibat.Brg_v3.12BG017390/Ibat.Brg_v3.12CG019960/Ibat.Brg_v3.12DG018610/Ibat.Brg_v3.12EG016540/Ibat.Brg_v3.12FG016640/Ibat.Brg_v3.13DG022070	7
GO:0070568	guanylyltransferase activity	5/1930	73/184965	0.00102742	0.0138784	0.0119308	Ibat.Brg_v3.12AG025750/Ibat.Brg_v3.12BG023830/Ibat.Brg_v3.12CG026760/Ibat.Brg_v3.12DG023130/Ibat.Brg_v3.12FG023300	5
GO:0015925	galactosidase activity	9/1930	241/184965	0.00108603	0.0145267	0.0124881	Ibat.Brg_v3.03AG010690/Ibat.Brg_v3.03FG011600/Ibat.Brg_v3.09CG011690/Ibat.Brg_v3.12AG022780/Ibat.Brg_v3.12BG011800/Ibat.Brg_v3.12CG012560/Ibat.Brg_v3.14BG016630/Ibat.Brg_v3.14BG017530/Ibat.Brg_v3.14DG015450	9
GO:0046912	acyltransferase, acyl groups converted into alkyl on transfer	6/1930	110/184965	0.0010909	0.0145267	0.0124881	Ibat.Brg_v3.11AG006100/Ibat.Brg_v3.11BG007140/Ibat.Brg_v3.11CG007480/Ibat.Brg_v3.11DG005000/Ibat.Brg_v3.11EG003760/Ibat.Brg_v3.13DG003240	6
GO:0060359	response to ammonium ion	5/1930	74/184965	0.00109249	0.0145267	0.0124881	Ibat.Brg_v3.12AG025750/Ibat.Brg_v3.12BG023830/Ibat.Brg_v3.12CG026760/Ibat.Brg_v3.12DG023130/Ibat.Brg_v3.12FG023300	5
GO:0097007	4,8,12-trimethyltrideca-1,3,7,11-tetraene synthase activity	3/1930	20/184965	0.00113232	0.0149011	0.01281	Ibat.Brg_v3.15AG008260/Ibat.Brg_v3.15BG009230/Ibat.Brg_v3.15DG009830	3
GO:0097008	(3E)-4,8-dimethyl-1,3,7-nonatriene synthase activity	3/1930	20/184965	0.00113232	0.0149011	0.01281	Ibat.Brg_v3.15AG008260/Ibat.Brg_v3.15BG009230/Ibat.Brg_v3.15DG009830	3
GO:0016846	carbon-sulfur lyase activity	6/1930	111/184965	0.00114317	0.0149668	0.0128665	Ibat.Brg_v3.12AG018940/Ibat.Brg_v3.12BG017390/Ibat.Brg_v3.12CG019960/Ibat.Brg_v3.12DG018610/Ibat.Brg_v3.12EG016540/Ibat.Brg_v3.12FG016640	6
GO:0010193	response to ozone	10/1930	296/184965	0.0012525	0.0163144	0.014025	Ibat.Brg_v3.03DG018780/Ibat.Brg_v3.05AG014120/Ibat.Brg_v3.08FG022570/Ibat.Brg_v3.12AG025750/Ibat.Brg_v3.12BG023830/Ibat.Brg_v3.12CG026760/Ibat.Brg_v3.12DG023130/Ibat.Brg_v3.12FG023300/Ibat.Brg_v3.14AG014090/Ibat.Brg_v3.14EG013010	10
GO:0006570	tyrosine metabolic process	6/1930	114/184965	0.00131153	0.0169967	0.0146115	Ibat.Brg_v3.04AG002940/Ibat.Brg_v3.04BG002490/Ibat.Brg_v3.04CG002080/Ibat.Brg_v3.04EG002560/Ibat.Brg_v3.04FG003900/Ibat.Brg_v3.07BG018080	6
GO:0015204	urea transmembrane transporter activity	4/1930	46/184965	0.00136063	0.0173685	0.0149311	Ibat.Brg_v3.03BG030650/Ibat.Brg_v3.03EG021420/Ibat.Brg_v3.03FG031730/Ibat.Brg_v3.04FG035830	4
GO:0071289	cellular response to nickel ion	4/1930	46/184965	0.00136063	0.0173685	0.0149311	Ibat.Brg_v3.07BG015240/Ibat.Brg_v3.07DG018090/Ibat.Brg_v3.07DG018120/Ibat.Brg_v3.07EG020450	4
GO:0071918	urea transmembrane transport	4/1930	46/184965	0.00136063	0.0173685	0.0149311	Ibat.Brg_v3.03BG030650/Ibat.Brg_v3.03EG021420/Ibat.Brg_v3.03FG031730/Ibat.Brg_v3.04FG035830	4
GO:0043455	regulation of secondary metabolic process	9/1930	253/184965	0.00151792	0.0192798	0.0165743	Ibat.Brg_v3.02BG029740/Ibat.Brg_v3.02BG030470/Ibat.Brg_v3.02BG030620/Ibat.Brg_v3.02CG028650/Ibat.Brg_v3.02EG026270/Ibat.Brg_v3.02FG028860/Ibat.Brg_v3.03BG001270/Ibat.Brg_v3.03CG009750/Ibat.Brg_v3.06FG015740	9
GO:0010297	heteropolysaccharide binding	3/1930	23/184965	0.00171854	0.0215576	0.0185324	Ibat.Brg_v3.09AG012700/Ibat.Brg_v3.09BG011990/Ibat.Brg_v3.15EG006570	3
GO:0042173	regulation of sporulation resulting in formation of a cellular spore	3/1930	23/184965	0.00171854	0.0215576	0.0185324	Ibat.Brg_v3.14AG019840/Ibat.Brg_v3.14DG017470/Ibat.Brg_v3.14DG018330	3
GO:0000096	sulfur amino acid metabolic process	8/1930	209/184965	0.00173103	0.0215576	0.0185324	Ibat.Brg_v3.12AG018940/Ibat.Brg_v3.12BG017390/Ibat.Brg_v3.12CG019960/Ibat.Brg_v3.12DG018610/Ibat.Brg_v3.12EG016540/Ibat.Brg_v3.12FG016640/Ibat.Brg_v3.13DG022070/Ibat.Brg_v3.S063830	8
GO:0009066	aspartate family amino acid metabolic process	8/1930	209/184965	0.00173103	0.0215576	0.0185324	Ibat.Brg_v3.06CG023270/Ibat.Brg_v3.12AG018940/Ibat.Brg_v3.12BG017390/Ibat.Brg_v3.12CG019960/Ibat.Brg_v3.12DG018610/Ibat.Brg_v3.12EG016540/Ibat.Brg_v3.12FG016640/Ibat.Brg_v3.S102690	8
GO:0010223	secondary shoot formation	9/1930	260/184965	0.00182747	0.0225388	0.0193759	Ibat.Brg_v3.02AG003210/Ibat.Brg_v3.02AG003220/Ibat.Brg_v3.02BG002540/Ibat.Brg_v3.02BG003630/Ibat.Brg_v3.02DG002560/Ibat.Brg_v3.02FG002220/Ibat.Brg_v3.14AG018240/Ibat.Brg_v3.14DG014840/Ibat.Brg_v3.14FG017970	9
GO:0010346	shoot axis formation	9/1930	260/184965	0.00182747	0.0225388	0.0193759	Ibat.Brg_v3.02AG003210/Ibat.Brg_v3.02AG003220/Ibat.Brg_v3.02BG002540/Ibat.Brg_v3.02BG003630/Ibat.Brg_v3.02DG002560/Ibat.Brg_v3.02FG002220/Ibat.Brg_v3.14AG018240/Ibat.Brg_v3.14DG014840/Ibat.Brg_v3.14FG017970	9
GO:0043405	regulation of MAP kinase activity	8/1930	212/184965	0.00189189	0.0232211	0.0199625	Ibat.Brg_v3.02BG030120/Ibat.Brg_v3.02CG029000/Ibat.Brg_v3.04AG019460/Ibat.Brg_v3.04DG019550/Ibat.Brg_v3.04EG025610/Ibat.Brg_v3.14AG019840/Ibat.Brg_v3.14DG017470/Ibat.Brg_v3.14DG018330	8
GO:0043410	positive regulation of MAPK cascade	8/1930	213/184965	0.00194805	0.0236926	0.0203678	Ibat.Brg_v3.02BG030120/Ibat.Brg_v3.02CG029000/Ibat.Brg_v3.04AG019460/Ibat.Brg_v3.04DG019550/Ibat.Brg_v3.04EG025610/Ibat.Brg_v3.14AG019840/Ibat.Brg_v3.14DG017470/Ibat.Brg_v3.14DG018330	8
GO:0055073	cadmium ion homeostasis	3/1930	24/184965	0.00194886	0.0236926	0.0203678	Ibat.Brg_v3.07CG008660/Ibat.Brg_v3.07EG008570/Ibat.Brg_v3.07FG007610	3
GO:0006555	methionine metabolic process	6/1930	125/184965	0.00209504	0.025349	0.0217917	Ibat.Brg_v3.12AG018940/Ibat.Brg_v3.12BG017390/Ibat.Brg_v3.12CG019960/Ibat.Brg_v3.12DG018610/Ibat.Brg_v3.12EG016540/Ibat.Brg_v3.12FG016640	6
GO:0045927	positive regulation of growth	10/1930	318/184965	0.00211694	0.0254932	0.0219157	Ibat.Brg_v3.01CG027000/Ibat.Brg_v3.01EG031640/Ibat.Brg_v3.01FG025190/Ibat.Brg_v3.03CG002470/Ibat.Brg_v3.03DG001980/Ibat.Brg_v3.09AG031830/Ibat.Brg_v3.09BG031210/Ibat.Brg_v3.09DG031910/Ibat.Brg_v3.09FG029760/Ibat.Brg_v3.09FG029960	10
GO:0000023	maltose metabolic process	3/1930	25/184965	0.0021975	0.026216	0.0225371	Ibat.Brg_v3.09AG012700/Ibat.Brg_v3.09BG011990/Ibat.Brg_v3.15EG006570	3
GO:0004764	shikimate 3-dehydrogenase (NADP+) activity	3/1930	25/184965	0.0021975	0.026216	0.0225371	Ibat.Brg_v3.04EG031570/Ibat.Brg_v3.04EG032070/Ibat.Brg_v3.04FG030150	3
GO:0019632	shikimate metabolic process	4/1930	53/184965	0.00230489	0.0272455	0.0234221	Ibat.Brg_v3.04EG031570/Ibat.Brg_v3.04EG032070/Ibat.Brg_v3.04FG030150/Ibat.Brg_v3.05CG020750	4
GO:0031122	cytoplasmic microtubule organization	12/1930	433/184965	0.00230514	0.0272455	0.0234221	Ibat.Brg_v3.01BG035930/Ibat.Brg_v3.01CG028810/Ibat.Brg_v3.01EG033410/Ibat.Brg_v3.01EG034310/Ibat.Brg_v3.01FG026970/Ibat.Brg_v3.02EG021880/Ibat.Brg_v3.06AG026700/Ibat.Brg_v3.06BG025780/Ibat.Brg_v3.06DG022900/Ibat.Brg_v3.06EG023710/Ibat.Brg_v3.11CG001310/Ibat.Brg_v3.14EG024130	12
GO:0006596	polyamine biosynthetic process	6/1930	128/184965	0.00235975	0.0277624	0.0238665	Ibat.Brg_v3.02BG020350/Ibat.Brg_v3.04AG002940/Ibat.Brg_v3.04BG002490/Ibat.Brg_v3.04CG002080/Ibat.Brg_v3.04EG002560/Ibat.Brg_v3.04FG003900	6
GO:0004565	beta-galactosidase activity	8/1930	221/184965	0.00244606	0.0286458	0.024626	Ibat.Brg_v3.03AG010690/Ibat.Brg_v3.03FG011600/Ibat.Brg_v3.12AG022780/Ibat.Brg_v3.12BG011800/Ibat.Brg_v3.12CG012560/Ibat.Brg_v3.14BG016630/Ibat.Brg_v3.14BG017530/Ibat.Brg_v3.14DG015450	8
GO:1902074	response to salt	6/1930	132/184965	0.00275087	0.0320684	0.0275682	Ibat.Brg_v3.01AG029810/Ibat.Brg_v3.01FG027100/Ibat.Brg_v3.12DG007250/Ibat.Brg_v3.13AG020090/Ibat.Brg_v3.13AG020210/Ibat.Brg_v3.13CG020320	6
GO:0043937	regulation of sporulation	3/1930	28/184965	0.00305809	0.0354877	0.0305077	Ibat.Brg_v3.14AG019840/Ibat.Brg_v3.14DG017470/Ibat.Brg_v3.14DG018330	3
GO:0031977	thylakoid lumen	11/1930	395/184965	0.00331519	0.0382972	0.0329229	Ibat.Brg_v3.01AG019780/Ibat.Brg_v3.01BG026160/Ibat.Brg_v3.01CG021690/Ibat.Brg_v3.01EG019220/Ibat.Brg_v3.01EG020080/Ibat.Brg_v3.01FG018150/Ibat.Brg_v3.11AG000240/Ibat.Brg_v3.11AG003680/Ibat.Brg_v3.11BG003460/Ibat.Brg_v3.11FG003850/Ibat.Brg_v3.13EG018770	11
GO:0009931	calcium-dependent protein serine/threonine kinase activity	9/1930	286/184965	0.00344379	0.039426	0.0338933	Ibat.Brg_v3.03AG033410/Ibat.Brg_v3.03DG023540/Ibat.Brg_v3.03FG031170/Ibat.Brg_v3.06BG014640/Ibat.Brg_v3.06EG014520/Ibat.Brg_v3.09AG002100/Ibat.Brg_v3.12AG024870/Ibat.Brg_v3.12DG022010/Ibat.Brg_v3.12FG022420	9
GO:0010857	calcium-dependent protein kinase activity	9/1930	286/184965	0.00344379	0.039426	0.0338933	Ibat.Brg_v3.03AG033410/Ibat.Brg_v3.03DG023540/Ibat.Brg_v3.03FG031170/Ibat.Brg_v3.06BG014640/Ibat.Brg_v3.06EG014520/Ibat.Brg_v3.09AG002100/Ibat.Brg_v3.12AG024870/Ibat.Brg_v3.12DG022010/Ibat.Brg_v3.12FG022420	9
GO:0008238	exopeptidase activity	12/1930	457/184965	0.00354998	0.0404603	0.0347825	Ibat.Brg_v3.02BG011400/Ibat.Brg_v3.02DG009720/Ibat.Brg_v3.02EG007650/Ibat.Brg_v3.02FG010330/Ibat.Brg_v3.04BG030690/Ibat.Brg_v3.04DG032800/Ibat.Brg_v3.07AG019040/Ibat.Brg_v3.07AG022970/Ibat.Brg_v3.07BG017020/Ibat.Brg_v3.11BG008110/Ibat.Brg_v3.11DG005930/Ibat.Brg_v3.13EG022690	12
GO:0015840	urea transport	4/1930	60/184965	0.00362399	0.0411202	0.0353498	Ibat.Brg_v3.03BG030650/Ibat.Brg_v3.03EG021420/Ibat.Brg_v3.03FG031730/Ibat.Brg_v3.04FG035830	4
GO:0016620	oxidoreductase activity, acting on the aldehyde or oxo group of donors, NAD or NADP as acceptor	8/1930	243/184965	0.00433781	0.0490019	0.0421255	Ibat.Brg_v3.06BG027260/Ibat.Brg_v3.06DG024270/Ibat.Brg_v3.11AG010300/Ibat.Brg_v3.11CG012710/Ibat.Brg_v3.11DG009790/Ibat.Brg_v3.11EG008240/Ibat.Brg_v3.11FG010930/Ibat.Brg_v3.S014930	8
GO:0080036	regulation of cytokinin-activated signaling pathway	6/1930	145/184965	0.00436103	0.0490472	0.0421644	Ibat.Brg_v3.02BG029740/Ibat.Brg_v3.02BG030470/Ibat.Brg_v3.02BG030620/Ibat.Brg_v3.02CG028650/Ibat.Brg_v3.02EG026270/Ibat.Brg_v3.02FG028860	6
