# Supplementary material for: Transcriptomic analyses reveal the potential regulators of the storage root skin color in sweet potato
Source: PeerJ. 2025 Dec 1;13:e20231. doi: 10.7717/peerj.20231 (PMC12677044; doi:10.7717/peerj.20231)
Supplement: Supplemental Information 8 [file peerj-13-20231-s008.xlsx]

## Sheet: Sheet1
Primer	Sequence (5'-3')
MYB3-F	TCGCCTTGTTGTGAGAAAGC
MYB3-R	TTCGCCATGAAGACGGATGT
MYB4-F	GAAAGCCGCACAAGAAGACG
MYB4-R	TGGATGGTAAGGAGGGCTGA
MYB6-F	CGTCGGGAGTGAAAAAGGGA
MYB6-R	CCTGCAACTTTTCCTGCACC
MYB75-F	TTATCGGACGCCATTGACCG
MYB75-R	ACTTGTCCTTGGTTCACGCA
tublin-F	CAACTACCAGCCACCAACTGT
tublin-R	CAAGATCCTCACGAGCTTCAC
