# Supplementary material for: Transcriptomic analyses reveal the potential regulators of the storage root skin color in sweet potato
Source: PeerJ. 2025 Dec 1;13:e20231. doi: 10.7717/peerj.20231 (PMC12677044; doi:10.7717/peerj.20231)
Supplement: Supplemental Information 15 [file peerj-13-20231-s015.xlsx]

## Sheet: Sheet1
MYB3	WT			MT
leaf	1.5049	1.85146	1.13027	1.21167	1.07998	0.764188
petiole	4.11056	3.63092	3.59336	1.35254	1.4811	1.25238
stem	1.91676	3.13109	3.5398	0.276944	0.417737	0.495057
skin	23.7963	27.1836	14.6687	6.6269	6.10645	9.76983
fresh	3.59502	3.99169	5.81589	2.67957	1.67481	3.11882
MYB4	WT			MT
leaf	1.2249	1.39442	0.876403	0.891516	1.16986	0.958821
petiole	0.688248	0.78187	1.18427	0.747597	0.814131	0.743463
stem	2.11746	2.0941	2.13219	0.921038	1.16824	1.19361
skin	3.78773	5.53021	4.90867	0.94737	1.32777	0.976032
fresh	1.04271	1.11522	1.00023	1.38351	0.807388	0.970859
MYB6	WT			MT
leaf	2.84198	4.35246	4.10148	1.04518	1.43765	0.665512
petiole	0.503538	3.86995	0.411002	0.173974	0.481214	0.195895
stem	2.31717	1.72518	0.76707	0.183738	0.281257	0.520467
skin	84.7947	92.8876	78.254	25.4503	29.9882	18.586
fresh	2.66777	2.69031	2.86056	0.265489	0.334625	0.736421
MYB75	WT			MT
leaf	2.95858	2.29525	2.83795	1.04519	0.788409	1.21354
petiole	1.02395	0.988502	1.84222	0.503853	0.693343	0.625031
stem	0.520597	0.601091	0.585747	0.639987	1.06153	1.28579
skin	77.0887	79.9276	84.4158	1.97794	1.81384	8.13738
fresh	4.92852	5.35027	4.80035	4.7028	5.12664	5.0923
